# Supplementary material for: Whole blood transcriptomics reveals the enrichment of neutrophil activation pathways during erythema nodosum leprosum reaction
Source: Front Immunol. 2024 Apr 23;15:1366125. doi: 10.3389/fimmu.2024.1366125 (PMC11074352; doi:10.3389/fimmu.2024.1366125)
Supplement: Supplementary file 1 [file DataSheet_1.docx]

**Whole blood transcriptomics reveals the enrichment of neutrophil activation pathways during erythema nodosum leprosum reaction**

**Thabatta Leal Silveira Andrezo Rosa1†, Thyago Leal-Calvo2†, Isabella Forasteiro Tavares2, Mayara Abud Mendes2, André Alves Dias1, Meire Hellen dos Santos Piauy1, Marcella Feitosa da Silva Barboza2, Marylee Kapuscinski3, Fabrício da Mota Ramalho Costa3, Maria Angela M. Marques3, Andrea de Faria F. Belone4, Anna Maria Sales2, Mariana de Andrea Hacker2, Marcia de Berredo Pinho Moreira1, John T. Belisle3, Milton Ozório Moraes2§, Maria Cristina Vidal Pessolani1# and Veronica Schmitz2#***

Supplementary Figures


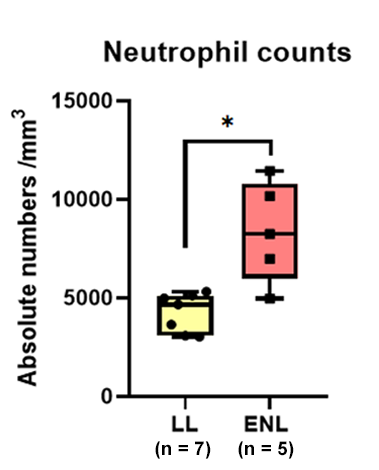


**Supplementary Figure S1.** **Neutrophil absolute numbers are increased in patients with ENL.** Blood counts available from patients with leprosy were assessed to determine neutrophil absolute numbers/mm3 in the cohort of RNAseq analysis (LL, n= 7; ENL, n= 5). Statistical analysis was performed using a two-tailed Welch’s t-test (* p < 0.05).


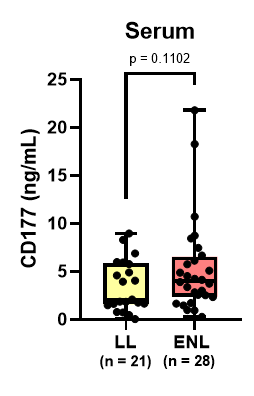


**Supplementary Figure S2.** **CD177 median levels in sera are increased in patients with ENL.** CD177 protein levels were determined in the sera of patients with non-reactional lepromatous leprosy (LL; n=21) or with active erythema nodosum leprosum (ENL; n=28). Results are shown as a boxplot with the median and interquartile range with minimum and maximum values, where each dot represents an individual patient. Statistical analysis was performed using a two-tailed Welch’s t-test.
