# Supplementary material for: Whole blood transcriptomics reveals the enrichment of neutrophil activation pathways during erythema nodosum leprosum reaction
Source: Front Immunol. 2024 Apr 23;15:1366125. doi: 10.3389/fimmu.2024.1366125 (PMC11074352; doi:10.3389/fimmu.2024.1366125)
Supplement: Supplementary file 3 [file Table_2.xls]

## Sheet: Table S2
Supplementary table 2 - Oligonucleotide primer sequences used in RT-qPCR assays. Fw -forward; Rv- reverse
Gene	Sequence (5' - 3')
CD177	Fw - ACACACGGAAACTTGGCTCA
	Rv- CCAGGGTTGATGTGAGTCCTAC
CHIT1	Fw - GGCCTGGGCAGGTTTCAT
	Rv- GCCCAGTTGGTGAAGTAGCA
S100A8	Fw - CCCTGCATGTCTCTTGTCAGC
	Rv- CTTTCTCCAGCTCGGTCAACA
S100A9	Fw - ACCTTCCACCAATACTCTGTGA
	Rv- CCAGGTCCTCCATGATGTGTTC
S100A12	Fw - CATTCCTGTGCATTGAGGGGTTA
	Rv- GCTTCAGCTCACCCTTAGAGAG
OLFM4	Fw - AGGTTCTGTGTCCCAGTTGTT
	Rv- CAAGCGTTCCACTCTGTCCA
IL5RA	Fw - CGCTCCAAAAGAAGATGACTATGA
	Rv- GCCAGTAGTGAGTGGTCGTT
NLRP6	Fw - GCAGACGGTCAGGGTACAG
	Rv- GGACTGCACACAGGTAGGTC
PI3	Fw - TCGTTCCCCAGTGAGAGGGAG
	Rv- CAGCCGTGGGCATCCTGAAT
VSIG4	Fw - TGACATACCCCTTGAAAGCAACA
	Rv- AAGACAGGCAGGCTCTTTCC
RPL13	Fw - GACAAGAAAAAGCGGATGGT
	Rv- GTACTTCCAGCCAACCTCGT
RPS16	Fw - GCGCACGCTACAGTACAAG
	Rv- AGATGGACTGACGGATAGCATA
