# Supplementary material for: Whole blood transcriptomics reveals the enrichment of neutrophil activation pathways during erythema nodosum leprosum reaction
Source: Front Immunol. 2024 Apr 23;15:1366125. doi: 10.3389/fimmu.2024.1366125 (PMC11074352; doi:10.3389/fimmu.2024.1366125)
Supplement: Supplementary file 4 [file Table_3.xls]

## Sheet: Table S3
Supplementary table 3 - Clinical and demographic information of patients enrolled in the RT-qPCR assay. BI - Bacillary index; BL- Borderline lepromatous; LL - Lepromatous leprosy; ENL - Erythema nodosum leprosum; MDT - Multidrug therapy; NA- Not applied.
Group	n	Sex n (%)	Age Mean (SD)	Clinical form	BI range min – max (median)	Reaction diagnosis n (%)	Thalidomide Follow-up n (%)	ENLIST severity classification n (%)
LL	7	Female – 4 (57%)	35 (± 12)	LL (100%)	3 - 6 (5)	NA	NA	NA
		Male – 3 (43%)
ENL	8	Female – 0 (0%)	27 (± 7)	BL - 1 (12%)	4.5 - 5.25 (4.75)	MDT Naïve – 1 (12.5%)	8 (100 %)	Mild – 1 (12.5%)
		Male – 8 (100%)				During MDT – 6 (75%)		Moderate - 3 (37.5 %)
				LL - 7 (88%)		Post MDT- 1 (12.5%)		Severe - 3 (37.5 %)
								Not classified - 1 (12.5%)
