# Supplementary material for: Whole blood transcriptomics reveals the enrichment of neutrophil activation pathways during erythema nodosum leprosum reaction
Source: Front Immunol. 2024 Apr 23;15:1366125. doi: 10.3389/fimmu.2024.1366125 (PMC11074352; doi:10.3389/fimmu.2024.1366125)
Supplement: Supplementary file 5 [file Table_4.xls]

## Sheet: Table S4
Supplementary table 4 - Clinical and demographic characteristics of patients included in the CD177 ELISA. BI - Bacillary index; BL- Borderline lepromatous; LL - Lepromatous leprosy; ENL - Erythema nodosum leprosum; MDT - Multidrug therapy; NA- Not applied.
Group	n	Sex n (%)	Age Mean (SD)	Clinical form	BI range min – max (median)	Reaction diagnosis n (%)	ENLIST severity classification n (%)
LL	21	Female – 8 (38%)	46 (± 16)	LL (100%)	2,25 - 6 (5)	NA	NA
		Male – 13 (62%)
ENL	28	Female – 11 (39%)	49 (± 20)	BL -4 (14%)	2.75 - 6 (5)	MDT Naïve – 6 (21%)	Mild – 5 (18%)
						During MDT – 12 (43%)	Moderate - 9 (32%)
		Male – 17 (61%)		LL - 24 (86%)		Post MDT-10 (36%)	Severe - 7 (25%)
							Not classified - 7 (25%)
