# Supplementary material for: Whole blood transcriptomics reveals the enrichment of neutrophil activation pathways during erythema nodosum leprosum reaction
Source: Front Immunol. 2024 Apr 23;15:1366125. doi: 10.3389/fimmu.2024.1366125 (PMC11074352; doi:10.3389/fimmu.2024.1366125)
Supplement: Supplementary file 6 [file Table_5.xls]

## Sheet: Table S5
Table S5 - Differentially expressed genes in RNAseq analysis of ENLxLL. Statistically differentially expressed genes are highlighted in yellow (parameter: |log2FC| ≥ 0.585 (FC ≥ 1.5) and padj ≤ 0.1). Genes are arranged in descending order of padj values. Log2FC- Log2FoldChange; lfcSE - log2FC Standard error; padj - Adjusted p value.
	SYMBOL	ENTREZID	GENENAME	baseMean	log2FC	lfcSE	pvalue	padj
	CD177	57126	CD177 molecule	828.954	2.95923	0.876476	1.258e-07	0.00029066
	AC139495.2			1852.7	1.93998	0.415209	9.48361e-08	0.00029066
	SOCS3	9021	suppressor of cytokine signaling 3	1002.61	2.04928	0.546635	8.58403e-07	0.00132223
	FCGR1B	2210	Fc fragment of IgG receptor Ib	647.325	1.8951	0.517179	1.19019e-06	0.00137496
	TLR5	7100	toll like receptor 5	402.351	1.48362	0.456749	2.78457e-06	0.0025735
	FCGR1A	2209	Fc fragment of IgG receptor Ia	1547.51	1.97154	0.703817	4.27526e-06	0.00304194
	MCEMP1	199675	mast cell expressed membrane protein 1	770.325	1.81889	0.643004	5.09648e-06	0.00304194
	LRG1	116844	leucine rich alpha-2-glycoprotein 1	1699.07	1.34085	0.46783	5.26629e-06	0.00304194
	FAM160A2	84067	family with sequence similarity 160 member A2	566.738	0.454856	0.175579	7.2964e-06	0.0037463
	HP	3240	haptoglobin	401.858	1.86491	0.895219	1.15328e-05	0.00456315
	KREMEN1	83999	kringle containing transmembrane protein 1	1416.33	1.55606	0.639935	1.17753e-05	0.00456315
	SMARCD3	6604	SWI/SNF related, matrix associated, actin dependent regulator of chromatin, subfamily d, member 3	455.351	1.04125	0.447524	1.18498e-05	0.00456315
	SF3A3	10946	splicing factor 3a subunit 3	421.081	-0.391804	0.152318	2.40517e-05	0.00854946
	STARD3	10948	StAR related lipid transfer domain containing 3	458.471	0.350387	0.120667	2.73911e-05	0.00904102
	CD274	29126	CD274 molecule	409.045	1.49893	0.893327	3.54216e-05	0.0102302
	TAF10	6881	TATA-box binding protein associated factor 10	865.944	0.343417	0.118765	3.46191e-05	0.0102302
	ANKRD22	118932	ankyrin repeat domain 22	331.207	1.44185	1.00594	4.64505e-05	0.0126263
	PGS1	9489	phosphatidylglycerophosphate synthase 1	758.856	0.845535	0.506143	5.80873e-05	0.0149123
	MMP8	4317	matrix metallopeptidase 8	445.973	1.25576	1.09298	7.16745e-05	0.0151461
	LHFPL2	10184	LHFPL tetraspan subfamily member 2	215.425	1.01117	0.638508	7.23403e-05	0.0151461
	ST3GAL4	6484	ST3 beta-galactoside alpha-2,3-sialyltransferase 4	376.806	0.887191	0.568109	7.86642e-05	0.0151461
	NFE2	4778	nuclear factor, erythroid 2	3371.82	0.663513	0.416614	7.64846e-05	0.0151461
	GBGT1	26301	globoside alpha-1,3-N-acetylgalactosaminyltransferase 1 (FORS blood group)	217.612	0.491455	0.276	7.03244e-05	0.0151461
	HLA-F	3134	major histocompatibility complex, class I, F	3819.61	0.396895	0.182747	6.52737e-05	0.0151461
	TMBIM6	7009	transmembrane BAX inhibitor motif containing 6	303.35	1.12758	0.815572	9.53634e-05	0.017627
	CDK5RAP2	55755	CDK5 regulatory subunit associated protein 2	561.356	1.04528	0.767052	0.000110767	0.0179272
	HCAR3	8843	hydroxycarboxylic acid receptor 3	1200.41	0.851563	0.587849	0.000107407	0.0179272
	VPS9D1	9605	VPS9 domain containing 1	541.329	0.800432	0.556028	0.000112687	0.0179272
	JAK3	3718	Janus kinase 3	3036.84	0.451089	0.262827	0.000115067	0.0179272
	NAPRT	93100	nicotinate phosphoribosyltransferase	521.604	0.389887	0.196057	0.000116385	0.0179272
	DSC2	1824	desmocollin 2	391.712	0.914732	0.664004	0.000123262	0.0182237
	KCNJ15	3772	potassium voltage-gated channel subfamily J member 15	3214.21	0.739477	0.523702	0.000126198	0.0182237
	PSME1	5720	proteasome activator subunit 1	289.047	0.344344	0.150342	0.000142802	0.0199966
	CPNE1	8904	copine 1	1171.73	0.292286	0.101152	0.000155433	0.0211252
	BATF2	116071	basic leucine zipper ATF-like transcription factor 2	438.204	1.00926	0.925698	0.000160389	0.021176
	GRINA	2907	glutamate ionotropic receptor NMDA type subunit associated protein 1	3163.13	0.616423	0.45222	0.000167668	0.021522
	OLFM4	10562	olfactomedin 4	418.021	0.878043	1.02048	0.000192473	0.0219018
	STOM	2040	stomatin	1182.94	0.568735	0.420516	0.000191409	0.0219018
	LTA4H	4048	leukotriene A4 hydrolase	2933.18	0.496213	0.345348	0.00019159	0.0219018
	GADD45B	4616	growth arrest and DNA damage inducible beta	664.935	0.494858	0.339117	0.000180646	0.0219018
	LILRB4	11006	leukocyte immunoglobulin like receptor B4	358.472	0.404069	0.238101	0.000194324	0.0219018
	NAIP	4671	NLR family apoptosis inhibitory protein	2700.96	0.743035	0.597815	0.000202076	0.0222332
	HCAR2	338442	hydroxycarboxylic acid receptor 2	879.336	0.645134	0.507286	0.000210832	0.0226571
	CYSTM1	84418	cysteine rich transmembrane module containing 1	493.631	0.7864	0.677592	0.00023349	0.0236001
	LMNB1	4001	lamin B1	278.253	0.75392	0.639986	0.000234929	0.0236001
	S100A9	6280	S100 calcium binding protein A9	36683.9	0.621173	0.493184	0.000227153	0.0236001
	PFKFB3	5209	6-phosphofructo-2-kinase/fructose-2,6-biphosphatase 3	1058.81	0.650521	0.540155	0.000253836	0.024437
	SERPINB9	5272	serpin family B member 9	699.004	-0.329586	0.151231	0.000253093	0.024437
	PADI2	11240	peptidyl arginine deiminase 2	2906.18	0.503654	0.394955	0.000295699	0.0278863
	IL4R	3566	interleukin 4 receptor	2544.12	0.473403	0.359994	0.000302575	0.027964
	MAPK14	1432	mitogen-activated protein kinase 14	2730.6	0.536704	0.456411	0.000351036	0.0311851
	ZNF438	220929	zinc finger protein 438	253.641	0.523179	0.44689	0.000371171	0.0311851
	DYSF	8291	dysferlin	4621.09	0.519113	0.43923	0.000364477	0.0311851
	FLOT2	2319	flotillin 2	6519.85	0.500231	0.416059	0.000367845	0.0311851
	PSMB9	5698	proteasome subunit beta 9	2583.29	0.412245	0.294554	0.000364823	0.0311851
	HAUS4	54930	HAUS augmin like complex subunit 4	526.607	0.42311	0.325693	0.000426962	0.0335084
	CTSA	5476	cathepsin A	1885.13	0.369592	0.241592	0.000427829	0.0335084
	GABARAP	11337	GABA type A receptor-associated protein	3938.91	0.346644	0.201339	0.000415621	0.0335084
	ATP6V0E1	8992	ATPase H+ transporting V0 subunit e1	1252.26	0.331214	0.175237	0.000411185	0.0335084
	LILRA5	353514	leukocyte immunoglobulin like receptor A5	2280.97	0.451712	0.376257	0.000459039	0.0348766
	FFAR2	2867	free fatty acid receptor 2	3362.89	0.437303	0.355198	0.000460393	0.0348766
	RILP	83547	Rab interacting lysosomal protein	599.819	0.533362	0.50091	0.000480467	0.0358103
	S100A12	6283	S100 calcium binding protein A12	1500.9	0.601042	0.614829	0.000498532	0.0365669
	BLOC1S1	2647	biogenesis of lysosomal organelles complex 1 subunit 1	385.504	0.313295	0.156772	0.000507456	0.0366399
	SECTM1	6398	secreted and transmembrane 1	4147.24	0.469101	0.427349	0.00055149	0.0381749
	BCL6	604	BCL6 transcription repressor	6763.88	0.461977	0.425555	0.000586544	0.0381749
	GAS7	8522	growth arrest specific 7	1692.19	0.445836	0.39149	0.000553637	0.0381749
	BCAP31	10134	B cell receptor associated protein 31	600.411	0.416499	0.34977	0.000578803	0.0381749
	FLOT1	10211	flotillin 1	2406.71	0.400698	0.321431	0.000570366	0.0381749
	LTBR	4055	lymphotoxin beta receptor	794.516	0.336983	0.206962	0.000573439	0.0381749
	GART	2618	phosphoribosylglycinamide formyltransferase, phosphoribosylglycinamide synthetase, phosphoribosylaminoimidazole synthetase	241.36	-0.284415	0.118219	0.000548152	0.0381749
	GK	2710	glycerol kinase	1564.4	0.531186	0.549523	0.000617245	0.0393461
	VAMP5	10791	vesicle associated membrane protein 5	271.886	0.482872	0.470817	0.000627196	0.0393461
	NUCB1	4924	nucleobindin 1	2705.12	0.425934	0.376829	0.000630083	0.0393461
	HK3	3101	hexokinase 3	696.775	0.435086	0.398337	0.000656409	0.0404436
	SBNO2	22904	strawberry notch homolog 2	3540.66	0.37736	0.299559	0.000676251	0.0411179
	CCNY	219771	cyclin Y	1141.53	0.293545	0.139519	0.000700727	0.0420527
	LCN2	3934	lipocalin 2	880.015	0.559675	0.724005	0.000740594	0.0426927
	DMTN	2039	dematin actin binding protein	7194.47	0.508132	0.576495	0.000796026	0.0426927
	ALPL	249	alkaline phosphatase, biomineralization associated	4838.4	0.48882	0.543668	0.000822472	0.0426927
	TIFA	92610	TRAF interacting protein with forkhead associated domain	319.715	0.487964	0.580202	0.000919594	0.0426927
	CA4	762	carbonic anhydrase 4	270.254	0.447967	0.48495	0.000914852	0.0426927
	LIMK2	3985	LIM domain kinase 2	3022.02	0.415718	0.406775	0.000857972	0.0426927
	DHRS13	147015	dehydrogenase/reductase 13	451.355	0.402918	0.391932	0.000911325	0.0426927
	AQP9	366	aquaporin 9	9197.81	0.398552	0.378716	0.000888229	0.0426927
	SH3GLB1	51100	SH3 domain containing GRB2 like, endophilin B1	1587.48	0.397957	0.359912	0.000794384	0.0426927
	MKNK1	8569	MAPK interacting serine/threonine kinase 1	1327.03	0.395153	0.359501	0.000821237	0.0426927
	UPP1	7378	uridine phosphorylase 1	720.449	0.388867	0.329534	0.000723356	0.0426927
	TRIM25	7706	tripartite motif containing 25	3356.7	0.38857	0.333345	0.000747472	0.0426927
	MBOAT2	129642	membrane bound O-acyltransferase domain containing 2	561.919	0.377768	0.341718	0.000919821	0.0426927
	PIM3	415116	Pim-3 proto-oncogene, serine/threonine kinase	1131.52	0.344415	0.258678	0.000841439	0.0426927
	GALK1	2584	galactokinase 1	215.3	0.32643	0.220494	0.000854481	0.0426927
	ITGAM	3684	integrin subunit alpha M	2946.02	0.324095	0.220212	0.000897386	0.0426927
	CYBC1	79415	cytochrome b-245 chaperone 1	2361.85	0.311314	0.193395	0.000923885	0.0426927
	RAB32	10981	RAB32, member RAS oncogene family	368.98	0.306767	0.182041	0.000914263	0.0426927
	ITGB2	3689	integrin subunit beta 2	13533.6	0.287039	0.140061	0.000895603	0.0426927
	SMC3	9126	structural maintenance of chromosomes 3	305.784	-0.223118	0.0774174	0.000822323	0.0426927
	PBRM1	55193	polybromo 1	265.434	-0.254108	0.0957437	0.000754148	0.0426927
	ATP6V0A2	23545	ATPase H+ transporting V0 subunit a2	237.804	-0.259855	0.103287	0.000873654	0.0426927
	RABGAP1L	9910	RAB GTPase activating protein 1 like	561.292	-0.280339	0.123652	0.000776679	0.0426927
	CD59	966	CD59 molecule (CD59 blood group)	1067.96	0.455044	0.525329	0.000999748	0.0439984
	SLC22A4	6583	solute carrier family 22 member 4	307.125	0.405063	0.410239	0.000982399	0.0439984
	LILRB3	11025	leukocyte immunoglobulin like receptor B3	2997.94	0.374492	0.3477	0.000998135	0.0439984
	B4GALT5	9334	beta-1,4-galactosyltransferase 5	1518.63	0.351775	0.294127	0.000976991	0.0439984
	RAB5IF	55969	RAB5 interacting factor	1317	0.311554	0.198771	0.000972116	0.0439984
	ALPK1	80216	alpha kinase 1	781.177	0.317124	0.216527	0.00101236	0.0441333
	AGO3	192669	argonaute RISC catalytic component 3	349.7	-0.269294	0.11816	0.00103265	0.044597
	NBEAL2	23218	neurobeachin like 2	6403.8	0.299968	0.178423	0.00105464	0.0451248
	AC099489.1			746.222	0.370006	0.352235	0.00108774	0.0461143
	ZSWIM8	23053	zinc finger SWIM-type containing 8	881.045	0.256221	0.104975	0.00111317	0.0467631
	GYPC	2995	glycophorin C (Gerbich blood group)	9066.77	0.428691	0.496746	0.00112756	0.046824
	SUN1	23353	Sad1 and UNC84 domain containing 1	218.745	-0.292453	0.166576	0.00113488	0.046824
	P2RY14	9934	purinergic receptor P2Y14	281.468	0.459674	0.647073	0.00117081	0.0468505
	PLIN4	729359	perilipin 4	222.685	0.389513	0.412572	0.00117608	0.0468505
	MSRB1	51734	methionine sulfoxide reductase B1	3681.43	0.338487	0.287238	0.00115625	0.0468505
	TAP1	6890	transporter 1, ATP binding cassette subfamily B member	4719.44	0.336813	0.283203	0.00115743	0.0468505
	SLC39A1	27173	solute carrier family 39 member 1	559.832	0.28608	0.156493	0.00120929	0.0477616
	TSPO	706	translocator protein	1864.35	0.317249	0.244868	0.00126495	0.0495369
	CAMP	820	cathelicidin antimicrobial peptide	479.629	0.429084	0.568053	0.00132856	0.0500909
	ICAM1	3383	intercellular adhesion molecule 1	673.212	0.333843	0.298833	0.0013373	0.0500909
	IRAG1			746.773	0.326328	0.274093	0.00130215	0.0500909
	USB1	79650	U6 snRNA biogenesis phosphodiesterase 1	1181.94	0.319364	0.258004	0.00132841	0.0500909
	MXD3	83463	MAX dimerization protein 3	432.865	0.316873	0.25279	0.00134414	0.0500909
	FBXL5	26234	F-box and leucine rich repeat protein 5	3112.57	0.314098	0.24292	0.0013264	0.0500909
	RELB	5971	RELB proto-oncogene, NF-kB subunit	473.67	0.298305	0.201226	0.00136681	0.0501274
	NUP43	348995	nucleoporin 43	215.966	-0.248923	0.102198	0.00135963	0.0501274
	NEU1	4758	neuraminidase 1	350.964	0.269004	0.129686	0.00139583	0.0506009
	LSM10	84967	LSM10, U7 small nuclear RNA associated	267.478	0.254982	0.109392	0.00140163	0.0506009
	GBP5	115362	guanylate binding protein 5	5585.07	0.401383	0.541466	0.00154891	0.050694
	MYL9	10398	myosin light chain 9	437.347	0.393612	0.514012	0.00156876	0.050694
	ACSL1	2180	acyl-CoA synthetase long chain family member 1	11209.6	0.344581	0.35788	0.0015528	0.050694
	DHRS12	79758	dehydrogenase/reductase 12	267.512	0.329971	0.300743	0.00143521	0.050694
	PPP1R3B	79660	protein phosphatase 1 regulatory subunit 3B	1388.24	0.322774	0.293875	0.00154686	0.050694
	CASP4	837	caspase 4	2288.28	0.315253	0.270272	0.00153849	0.050694
	NCF4	4689	neutrophil cytosolic factor 4	1171.17	0.305891	0.236902	0.0014964	0.050694
	YIPF1	54432	Yip1 domain family member 1	364.198	0.294911	0.208991	0.00156568	0.050694
	SIRPA	140885	signal regulatory protein alpha	3565.97	0.293316	0.20103	0.00153394	0.050694
	SLC9A8	23315	solute carrier family 9 member A8	764.294	0.293276	0.200454	0.00152883	0.050694
	STXBP2	6813	syntaxin binding protein 2	809.74	0.287385	0.184325	0.00155696	0.050694
	MTX1	4580	metaxin 1	465.452	0.283598	0.164797	0.00143819	0.050694
	MIIP	60672	migration and invasion inhibitory protein	412.624	0.28208	0.165783	0.00151786	0.050694
	CTSZ	1522	cathepsin Z	2728.34	0.2642	0.124259	0.00148582	0.050694
	LIMD1	8994	LIM domains containing 1	348.288	-0.269787	0.135835	0.00152219	0.050694
	FCGR3B	2215	Fc fragment of IgG receptor IIIb	29896	0.316712	0.279892	0.00158289	0.0507952
	JMJD6	23210	jumonji domain containing 6, arginine demethylase and lysine hydroxylase	260.528	0.278001	0.159248	0.00159678	0.0508878
	AC018755.2			560.513	0.341723	0.360333	0.00162705	0.0514972
	SIPA1L2	57568	signal induced proliferation associated 1 like 2	372.773	0.369466	0.446675	0.00164007	0.0515562
	DESI1	27351	desumoylating isopeptidase 1	352.862	0.254673	0.114322	0.00166856	0.0520973
	SLC25A37	51312	solute carrier family 25 member 37	23934.1	0.362432	0.44135	0.00172854	0.052657
	GUK1	2987	guanylate kinase 1	6261.86	0.361631	0.436896	0.00171954	0.052657
	AGTRAP	57085	angiotensin II receptor associated protein	511.787	0.291314	0.213322	0.00174346	0.052657
	NARF	26502	nuclear prelamin A recognition factor	965.848	0.287551	0.199557	0.0017361	0.052657
	SH3BP2	6452	SH3 domain binding protein 2	2744.74	0.262772	0.12921	0.00173684	0.052657
	CST7	8530	cystatin F	1638.86	0.364581	0.466981	0.00181096	0.0539899
	NLRC4	58484	NLR family CARD domain containing 4	517.167	0.309477	0.282797	0.00180809	0.0539899
	SEMA4A	64218	semaphorin 4A	1615.24	0.293691	0.2306	0.0018354	0.0543679
	SMOX	54498	spermine oxidase	324.097	0.375257	0.541691	0.0018587	0.0547073
	SLC38A5	92745	solute carrier family 38 member 5	554.682	0.354764	0.45232	0.00191461	0.055732
	ALAS2	212	5'-aminolevulinate synthase 2	24661.1	0.354303	0.615066	0.00192692	0.055732
	IL1B	3553	interleukin 1 beta	619.974	0.327544	0.361923	0.00195382	0.055732
	FRAT2	23401	FRAT regulator of WNT signaling pathway 2	3676.77	0.28416	0.206096	0.00195333	0.055732
	PPM1K	152926	protein phosphatase, Mg2+/Mn2+ dependent 1K	335.654	-0.275727	0.17325	0.0019326	0.055732
	SERPINB1	1992	serpin family B member 1	2472.77	0.306287	0.291752	0.00198163	0.0561785
	FCGR2A	2212	Fc fragment of IgG receptor IIa	1838.83	0.292843	0.244704	0.00200656	0.0565385
	HCK	3055	HCK proto-oncogene, Src family tyrosine kinase	5295.53	0.281225	0.208013	0.0021062	0.0589862
	CHPF2	54480	chondroitin polymerizing factor 2	614.176	0.245737	0.110978	0.0021663	0.0603041
	NAMPT	10135	nicotinamide phosphoribosyltransferase	20300.7	0.312324	0.338261	0.00218149	0.0603633
	SLC4A1	6521	solute carrier family 4 member 1 (Diego blood group)	1197.55	0.337405	0.587796	0.00220615	0.0604808
	CD63	967	CD63 molecule	2283.39	0.276961	0.199353	0.00221192	0.0604808
	PPBP	5473	pro-platelet basic protein	699.509	0.318637	0.374006	0.0022648	0.0604949
	MCTP2	55784	multiple C2 and transmembrane domain containing 2	1016.13	0.304589	0.317415	0.00225086	0.0604949
	CEBPB	1051	CCAAT enhancer binding protein beta	3947.17	0.285403	0.237796	0.00223468	0.0604949
	RNASEH2C	84153	ribonuclease H2 subunit C	219.139	0.250909	0.120547	0.00226413	0.0604949
	MOB3C	148932	MOB kinase activator 3C	368.783	0.265631	0.159734	0.0022999	0.0610794
	ERLIN1	10613	ER lipid raft associated 1	341.14	0.312664	0.35872	0.00232402	0.0613492
	ELF4	2000	E74 like ETS transcription factor 4	467.977	0.284253	0.244496	0.00234988	0.0613492
	GRAMD1A	57655	GRAM domain containing 1A	1762.31	0.276806	0.209789	0.00233851	0.0613492
	RGL4	266747	ral guanine nucleotide dissociation stimulator like 4	259.668	0.310962	0.360871	0.00238885	0.0620162
	RUNDC3A	10900	RUN domain containing 3A	703.559	0.332986	0.544048	0.00243364	0.0626917
	GBA	2629	glucosylceramidase beta	664.809	0.262758	0.156856	0.00244201	0.0626917
	TAL1	6886	TAL bHLH transcription factor 1, erythroid differentiation factor	327.126	0.329444	0.471982	0.00248335	0.0628915
	NIBAN1	116496	niban apoptosis regulator 1	4970.54	0.290817	0.288757	0.00249062	0.0628915
	DENND1A	57706	DENN domain containing 1A	457.33	0.267077	0.176936	0.0024817	0.0628915
	THOC5	8563	THO complex 5	542.617	0.261866	0.156795	0.00250469	0.0629032
	ITGAX	3687	integrin subunit alpha X	6764.92	0.267947	0.185254	0.00253971	0.0631798
	BET1L	51272	Bet1 golgi vesicular membrane trafficking protein like	419.447	0.233853	0.101559	0.00254305	0.0631798
	ABCA2	20	ATP binding cassette subfamily A member 2	555.776	0.272637	0.211307	0.00257284	0.0635781
	CLU	1191	clusterin	1099.43	0.307638	0.379645	0.00261468	0.0642343
	CSF2RB	1439	colony stimulating factor 2 receptor beta common subunit	8219.4	0.274095	0.223944	0.0026272	0.0642343
	EHBP1L1	254102	EH domain binding protein 1 like 1	3707.89	0.259916	0.158706	0.00268594	0.0653248
	TNIP1	10318	TNFAIP3 interacting protein 1	3043.29	0.266402	0.190992	0.00270755	0.0655057
	TRIB1	10221	tribbles pseudokinase 1	405.113	0.271053	0.218573	0.00273609	0.0658513
	PRCP	5547	prolylcarboxypeptidase	1106.86	0.249234	0.12791	0.00275576	0.0659813
	KIAA1143	57456	KIAA1143	231.387	-0.219055	0.0903165	0.0027979	0.0666448
	ITGA2B	3674	integrin subunit alpha 2b	715.121	0.311701	0.449087	0.0028325	0.067123
	SELL	6402	selectin L	18132.1	0.264136	0.191251	0.00285705	0.0673593
	TNFRSF1A	7132	TNF receptor superfamily member 1A	4525.96	0.26346	0.189022	0.00287568	0.0674543
	PYGL	5836	glycogen phosphorylase L	3915.01	0.272597	0.243503	0.0028964	0.0675168
	AP000295.1			332.837	0.270697	0.235457	0.00292217	0.0675168
	GAPDH	2597	glyceraldehyde-3-phosphate dehydrogenase	220.27	0.262967	0.189187	0.00291099	0.0675168
	PSMB8	5696	proteasome subunit beta 8	1729.88	0.256412	0.157579	0.00294425	0.0676885
	KCNJ2	3759	potassium voltage-gated channel subfamily J member 2	1111.66	0.285063	0.323823	0.00301082	0.0687624
	SORT1	6272	sortilin 1	726.003	0.277079	0.287432	0.00306536	0.0687624
	PRDX5	25824	peroxiredoxin 5	1182.96	0.265913	0.217778	0.00302738	0.0687624
	PSMB4	5692	proteasome subunit beta 4	986.656	0.230066	0.10218	0.00305304	0.0687624
	NFATC2IP	84901	nuclear factor of activated T cells 2 interacting protein	522.58	-0.23654	0.110052	0.00304356	0.0687624
	PSMB3	5691	proteasome subunit beta 3	1077.48	0.256797	0.168622	0.00309801	0.069159
	BRD8	10902	bromodomain containing 8	374.772	0.222696	0.0953589	0.00311311	0.069162
	ADGRG3	222487	adhesion G protein-coupled receptor G3	2577.77	0.268213	0.260756	0.00328778	0.0719378
	RETREG2	79137	reticulophagy regulator family member 2	1794.98	0.261392	0.215325	0.00329195	0.0719378
	WSB2	55884	WD repeat and SOCS box containing 2	490.905	0.257878	0.190766	0.00329379	0.0719378
	NFKB2	4791	nuclear factor kappa B subunit 2	732.433	0.23967	0.118486	0.00330179	0.0719378
	PPP1R11	6992	protein phosphatase 1 regulatory inhibitor subunit 11	679.976	0.226995	0.101017	0.0033159	0.0719378
	IFITM1	8519	interferon induced transmembrane protein 1	5778.08	0.275921	0.31841	0.0033677	0.0725228
	LRRC58	116064	leucine rich repeat containing 58	237.378	-0.176354	0.0669998	0.00337425	0.0725228
	FAM210B	116151	family with sequence similarity 210 member B	3474.84	0.287709	0.419435	0.00345226	0.073856
	ZFP36	7538	ZFP36 ring finger protein	2840.89	0.256371	0.198977	0.00349253	0.0742664
	AOAH	313	acyloxyacyl hydrolase	1268.22	0.253017	0.174912	0.00350359	0.0742664
	GNG10	2790	G protein subunit gamma 10	720.336	0.272479	0.33574	0.00365156	0.0754457
	GCA	25801	grancalcin	5508.8	0.264887	0.277071	0.00360939	0.0754457
	S100A11	6282	S100 calcium binding protein A11	6577.41	0.256638	0.21933	0.00365718	0.0754457
	TMEM185B	79134	transmembrane protein 185B	334.165	0.249133	0.159128	0.00363804	0.0754457
	LPCAT3	10162	lysophosphatidylcholine acyltransferase 3	364.202	0.246266	0.142498	0.00357922	0.0754457
	CFD	1675	complement factor D	1165.65	-0.270599	0.314448	0.00359373	0.0754457
	KIAA0040	9674	KIAA0040	1531.13	0.254478	0.205613	0.00369951	0.0756435
	IGFLR1	79713	IGF like family receptor 1	485.457	0.25082	0.174267	0.00369233	0.0756435
	BRI3	25798	brain protein I3	1945.74	0.247967	0.164542	0.00383976	0.0781653
	BPI	671	bactericidal permeability increasing protein	406.266	0.271384	0.463195	0.0039712	0.0788644
	F5	2153	coagulation factor V	451.442	0.261634	0.320898	0.00410831	0.0788644
	HSPA1B	3304	heat shock protein family A (Hsp70) member 1B	505.362	0.261363	0.314411	0.00408153	0.0788644
	RNA5-8SP6	100873336	RNA, 5.8S ribosomal pseudogene 6	2318.06	0.259207	0.479715	0.00420059	0.0788644
	UBE2F	140739	ubiquitin conjugating enzyme E2 F (putative)	380.099	0.257948	0.299686	0.00418183	0.0788644
	PINK1	65018	PTEN induced kinase 1	2088.25	0.256496	0.299541	0.00426897	0.0788644
	FURIN	5045	furin, paired basic amino acid cleaving enzyme	2708.54	0.251841	0.208277	0.0039307	0.0788644
	NATD1	256302	N-acetyltransferase domain containing 1	1456.35	0.251183	0.248709	0.00427835	0.0788644
	FPR2	2358	formyl peptide receptor 2	2653.35	0.250756	0.225611	0.00414857	0.0788644
	DUSP3	1845	dual specificity phosphatase 3	422.792	0.249797	0.190282	0.00395169	0.0788644
	NABP1	64859	nucleic acid binding protein 1	2009.11	0.24941	0.230649	0.00428986	0.0788644
	SLC25A44	9673	solute carrier family 25 member 44	1021.78	0.249237	0.194003	0.00403396	0.0788644
	RGS3	5998	regulator of G protein signaling 3	557.443	0.249003	0.194039	0.00405506	0.0788644
	LRP10	26020	LDL receptor related protein 10	7580.49	0.248613	0.191112	0.0040655	0.0788644
	PITPNA	5306	phosphatidylinositol transfer protein alpha	979.765	0.247189	0.196987	0.00424246	0.0788644
	PTPRJ	5795	protein tyrosine phosphatase receptor type J	2569.06	0.246718	0.162465	0.00393836	0.0788644
	ARRB2	409	arrestin beta 2	6918.69	0.245856	0.172311	0.00415353	0.0788644
	MTRNR2L6	100463482	MT-RNR2 like 6	1490.07	0.244443	0.16612	0.00423167	0.0788644
	HLA-E	3133	major histocompatibility complex, class I, E	39939.2	0.242274	0.148209	0.00418781	0.0788644
	MBD6	114785	methyl-CpG binding domain protein 6	1567.68	0.239825	0.133316	0.00405664	0.0788644
	UFD1	7353	ubiquitin recognition factor in ER associated degradation 1	331.146	0.232171	0.113972	0.00397293	0.0788644
	PIP4P1	90809	phosphatidylinositol-4,5-bisphosphate 4-phosphatase 1	299.275	0.208728	0.0887675	0.00404705	0.0788644
	ARPP19	10776	cAMP regulated phosphoprotein 19	657.004	-0.18671	0.07484	0.00421511	0.0788644
	TOP2B	7155	DNA topoisomerase II beta	742.715	-0.202747	0.0848661	0.00417448	0.0788644
	PRKY	5616	protein kinase Y-linked (pseudogene)	272.376	-0.242795	0.157632	0.00430076	0.0788644
	INPP5B	3633	inositol polyphosphate-5-phosphatase B	219.805	-0.241335	0.149604	0.00433376	0.0791554
	RAB24	53917	RAB24, member RAS oncogene family	1289.58	0.240378	0.146398	0.00438548	0.0795275
	CMPK1	51727	cytidine/uridine monophosphate kinase 1	458.231	-0.222175	0.103392	0.00438855	0.0795275
	NPRL3	8131	NPR3 like, GATOR1 complex subunit	1536.77	0.261177	0.384783	0.00442317	0.0798416
	ZC3H3	23144	zinc finger CCCH-type containing 3	433.696	0.246421	0.222443	0.00448162	0.0805819
	SAP18	10284	Sin3A associated protein 18	730.282	0.231175	0.118785	0.00452506	0.0810477
	TNFRSF14	8764	TNF receptor superfamily member 14	1761.36	0.227618	0.112475	0.00455797	0.0813218
	F13A1	2162	coagulation factor XIII A chain	1254.62	0.244933	0.222019	0.00460762	0.0818916
	KLF1	10661	Kruppel like factor 1	324.066	0.253709	0.445898	0.00464138	0.0821756
	ANKRD9	122416	ankyrin repeat domain 9	321.819	0.253602	0.437478	0.00469407	0.0824687
	FCER1G	2207	Fc fragment of IgE receptor Ig	2836.75	0.246137	0.255412	0.00470334	0.0824687
	FAM89B	23625	family with sequence similarity 89 member B	553.81	0.232905	0.125799	0.00471148	0.0824687
	SIGLEC9	27180	sialic acid binding Ig like lectin 9	714.698	0.240905	0.186544	0.00479639	0.0828718
	C19orf38	255809	chromosome 19 open reading frame 38	847.069	0.240138	0.170329	0.00476666	0.0828718
	MVP	9961	major vault protein	739.133	0.240024	0.171827	0.00479296	0.0828718
	RNF146	81847	ring finger protein 146	346.107	0.233486	0.12937	0.00480624	0.0828718
	MFSD14B	84641	major facilitator superfamily domain containing 14B	1019.09	0.240723	0.194631	0.00486068	0.0834989
	GFUS			883.274	0.250936	0.38008	0.00492897	0.0837953
	PPM1M	132160	protein phosphatase, Mg2+/Mn2+ dependent 1M	1029.9	0.237482	0.155122	0.00493234	0.0837953
	CARS2	79587	cysteinyl-tRNA synthetase 2, mitochondrial	943.105	0.235731	0.142394	0.00493056	0.0837953
	GBP2	2634	guanylate binding protein 2	5173.22	0.240242	0.224871	0.00504771	0.0851295
	UBAP1	51271	ubiquitin associated protein 1	1053.78	0.239055	0.194341	0.00503687	0.0851295
	TREML1	340205	triggering receptor expressed on myeloid cells like 1	270.923	0.244289	0.319365	0.00516863	0.0865371
	CLC	1178	Charcot-Leyden crystal galectin	411.109	-0.246261	0.355645	0.00515596	0.0865371
	GRB10	2887	growth factor receptor bound protein 10	263.175	0.244631	0.399123	0.00524341	0.0865419
	CREB5	9586	cAMP responsive element binding protein 5	1772.73	0.238446	0.244559	0.00529584	0.0865419
	FAM157A	728262	family with sequence similarity 157 member A	10079.8	0.238104	0.235274	0.00529089	0.0865419
	TPP1	1200	tripeptidyl peptidase 1	218.515	0.237475	0.196171	0.00521713	0.0865419
	PPP1R3D	5509	protein phosphatase 1 regulatory subunit 3D	367.585	0.2366	0.172151	0.00521424	0.0865419
	LYPLA1	10434	lysophospholipase 1	389.283	0.235662	0.166739	0.00530001	0.0865419
	DERL2	51009	derlin 2	265.249	0.233089	0.139566	0.00525982	0.0865419
	JUNB	3726	JunB proto-oncogene, AP-1 transcription factor subunit	3173.9	0.236385	0.204534	0.00536313	0.0872642
	EIF4E3	317649	eukaryotic translation initiation factor 4E family member 3	1060.38	0.235337	0.178924	0.00540747	0.0876769
	BLVRB	645	biliverdin reductase B	2254.4	0.240673	0.335178	0.00546772	0.0877184
	ALOX5	240	arachidonate 5-lipoxygenase	3862.96	0.235256	0.202525	0.00548257	0.0877184
	CYB5R3	1727	cytochrome b5 reductase 3	770.452	0.235225	0.21882	0.00552392	0.0877184
	PLEK	5341	pleckstrin	3936.08	0.233457	0.154729	0.00549934	0.0877184
	RNF181	51255	ring finger protein 181	215.211	0.225381	0.118258	0.00551506	0.0877184
	PLEKHM2	23207	pleckstrin homology and RUN domain containing M2	659.776	0.215918	0.102636	0.0054794	0.0877184
	SERPINA1	5265	serpin family A member 1	13387.2	0.233719	0.189215	0.0056368	0.0884093
	CANT1	124583	calcium activated nucleotidase 1	421.873	0.233019	0.160226	0.00561972	0.0884093
	PLP2	5355	proteolipid protein 2	1451.23	0.232618	0.160357	0.00567986	0.0884093
	GMPR2	51292	guanosine monophosphate reductase 2	650.708	0.229958	0.136823	0.00570136	0.0884093
	MAEA	10296	macrophage erythroblast attacher	989.553	0.228866	0.130315	0.00564059	0.0884093
	TAPBPL	55080	TAP binding protein like	403.58	0.221957	0.112965	0.00567739	0.0884093
	EIF5B	9669	eukaryotic translation initiation factor 5B	276.627	-0.227114	0.125129	0.00568752	0.0884093
	IFITM2	10581	interferon induced transmembrane protein 2	25662.3	0.233212	0.236159	0.00577062	0.0888375
	BST1	683	bone marrow stromal cell antigen 1	972.209	0.232469	0.183824	0.00578665	0.0888375
	LIX1L	128077	limb and CNS expressed 1 like	299.84	-0.214607	0.102672	0.00577269	0.0888375
	LINC00869	57234	long intergenic non-protein coding RNA 869	452.687	0.220278	0.111393	0.00584535	0.0894416
	CDC34	997	cell division cycle 34	1951.33	0.232759	0.298023	0.00597233	0.0898531
	PLIN5	440503	perilipin 5	261.099	0.232006	0.247304	0.00591525	0.0898531
	DSE	29940	dermatan sulfate epimerase	289.782	0.23159	0.17971	0.00589833	0.0898531
	LIN7A	8825	lin-7 homolog A, crumbs cell polarity complex component	367.843	0.231161	0.210172	0.00596002	0.0898531
	TPD52L2	7165	TPD52 like 2	1659.29	0.228927	0.140415	0.00598891	0.0898531
	RCAN3	11123	RCAN family member 3	377.62	-0.231043	0.184285	0.00597464	0.0898531
	RAP1GAP	5909	RAP1 GTPase activating protein	304.631	0.183996	0.456544	0.00600962	0.0898719
	CSF3R	1441	colony stimulating factor 3 receptor	36465.9	0.230599	0.185258	0.00603387	0.0899436
	PROK2	60675	prokineticin 2	1940.66	0.230389	0.272138	0.00612329	0.0899773
	STAT5B	6777	signal transducer and activator of transcription 5B	3693.99	0.229977	0.165586	0.00610472	0.0899773
	CD300A	11314	CD300a molecule	2201.27	0.229875	0.171331	0.0061317	0.0899773
	AGFG1	3267	ArfGAP with FG repeats 1	407.87	0.229453	0.198863	0.00617243	0.0899773
	ACAA1	30	acetyl-CoA acyltransferase 1	430.903	0.22933	0.151972	0.00612134	0.0899773
	LTF	4057	lactotransferrin	2435	0.223233	0.419701	0.00617073	0.0899773
	PPIL2	23759	peptidylprolyl isomerase like 2	301.299	-0.224813	0.125264	0.0061519	0.0899773
	F2RL1	2150	F2R like trypsin receptor 1	289.766	0.228317	0.241852	0.00628817	0.091151
	LDHA	3939	lactate dehydrogenase A	1518.7	0.227059	0.13905	0.00629745	0.091151
	STK26	51765	serine/threonine kinase 26	316.023	-0.219508	0.113865	0.00631212	0.091151
	ARAF	369	A-Raf proto-oncogene, serine/threonine kinase	734.388	0.21133	0.101694	0.00635587	0.0914968
	AHSP	51327	alpha hemoglobin stabilizing protein	854.794	0.210771	0.436771	0.00637882	0.0915421
	SEPHS2	22928	selenophosphate synthetase 2	595.809	0.227963	0.164476	0.00641734	0.0915643
	CYTH4	27128	cytohesin 4	1034.04	0.227788	0.185426	0.00642	0.0915643
	TBKBP1	9755	TBK1 binding protein 1	452.974	0.22686	0.207605	0.00648607	0.0922219
	TUT4	23318	terminal uridylyl transferase 4	260.278	-0.222346	0.123232	0.00654036	0.0927086
	SLC12A9	56996	solute carrier family 12 member 9	2539.74	0.226879	0.174305	0.00658185	0.0927995
	CDC73	79577	cell division cycle 73	282.955	0.225721	0.140327	0.00658694	0.0927995
	TXN	7295	thioredoxin	273.522	0.225601	0.212214	0.00663406	0.0931793
	H3-3A			17269.3	0.226458	0.169371	0.00665838	0.0932374
	CHD7	55636	chromodomain helicase DNA binding protein 7	288.985	-0.226002	0.149458	0.00668158	0.0932797
	APOL1	8542	apolipoprotein L1	943.574	0.224173	0.257835	0.00673417	0.0937308
	SELENBP1	8991	selenium binding protein 1	543.285	0.216448	0.400734	0.00679485	0.0942912
	LRPAP1	4043	LDL receptor related protein associated protein 1	1416.67	0.224873	0.148641	0.00688582	0.0943443
	SHKBP1	92799	SH3KBP1 binding protein 1	626.423	0.223481	0.217838	0.00688638	0.0943443
	KCMF1	56888	potassium channel modulatory factor 1	601.035	0.218955	0.117413	0.00682315	0.0943443
	GSK3A	2931	glycogen synthase kinase 3 alpha	895.682	0.217521	0.114591	0.00686342	0.0943443
	DIP2A	23181	disco interacting protein 2 homolog A	456.71	-0.221887	0.127282	0.00690075	0.0943443
	AC092299.1			2000.79	0.22247	0.246246	0.00693537	0.0945379
	PLEKHO2	80301	pleckstrin homology domain containing O2	2768.9	0.224415	0.166659	0.00700414	0.0951945
	ZDHHC3	51304	zinc finger DHHC-type containing 3	784.625	0.223366	0.172187	0.00715672	0.0953612
	PADI4	23569	peptidyl arginine deiminase 4	1826.86	0.22311	0.191451	0.00707194	0.0953612
	TLR8	51311	toll like receptor 8	1680.36	0.223092	0.187402	0.00710128	0.0953612
	CEACAM3	1084	carcinoembryonic antigen related cell adhesion molecule 3	1157.21	0.223038	0.171542	0.00721613	0.0953612
	VAV1	7409	vav guanine nucleotide exchange factor 1	1782.5	0.222395	0.137546	0.00720215	0.0953612
	NOD2	64127	nucleotide binding oligomerization domain containing 2	683.564	0.222251	0.187111	0.00723311	0.0953612
	ATP6V0B	533	ATPase H+ transporting V0 subunit b	2072.26	0.222166	0.138018	0.0072638	0.0953612
	SRF	6722	serum response factor	474.76	0.221399	0.132633	0.00726404	0.0953612
	BASP1	10409	brain abundant membrane attached signal protein 1	5458.79	0.220697	0.240299	0.00715875	0.0953612
	IL18R1	8809	interleukin 18 receptor 1	393.511	0.219859	0.338857	0.00705284	0.0953612
	GBP1	2633	guanylate binding protein 1	2658.77	0.218276	0.330446	0.00722068	0.0953612
	GCC2	9648	GRIP and coiled-coil domain containing 2	288.539	-0.223078	0.144182	0.00718929	0.0953612
	WDR45	11152	WD repeat domain 45	988.044	0.221402	0.195264	0.0073004	0.095567
	IL2RG	3561	interleukin 2 receptor subunit gamma	3167.36	0.2172	0.118167	0.00732856	0.0956646
	EMILIN2	84034	elastin microfibril interfacer 2	887.018	0.222475	0.159273	0.00737522	0.0959224
	IRF1	3659	interferon regulatory factor 1	7275.86	0.220998	0.191314	0.00739403	0.0959224
	YPEL3	83719	yippee like 3	5001.84	0.22094	0.183451	0.00747286	0.0959224
	HRH2	3274	histamine receptor H2	2019.14	0.219896	0.203013	0.00746338	0.0959224
	HGS	9146	hepatocyte growth factor-regulated tyrosine kinase substrate	798.381	0.215005	0.114276	0.00746304	0.0959224
	ATM	472	ATM serine/threonine kinase	1116.24	-0.220073	0.129684	0.00744378	0.0959224
	EDEM2	55741	ER degradation enhancing alpha-mannosidase like protein 2	449.189	0.221154	0.152865	0.00764217	0.0967375
	JPT1	51155	Jupiter microtubule associated homolog 1	1067.29	0.22052	0.174575	0.007628	0.0967375
	HLA-C	3107	major histocompatibility complex, class I, C	74670.7	0.220176	0.172591	0.00770849	0.0967375
	TPST2	8459	tyrosylprotein sulfotransferase 2	821.766	0.219949	0.134568	0.0076661	0.0967375
	TRAPPC5	126003	trafficking protein particle complex 5	637.153	0.219281	0.193374	0.00764405	0.0967375
	STN1	79991	STN1 subunit of CST complex	245.533	0.218698	0.190591	0.00776663	0.0967375
	PGLYRP1	8993	peptidoglycan recognition protein 1	580.72	0.21682	0.259271	0.00756375	0.0967375
	IL18RAP	8807	interleukin 18 receptor accessory protein	1024.22	0.215456	0.284096	0.00764097	0.0967375
	TMEM222	84065	transmembrane protein 222	326.716	0.200397	0.0952553	0.00776481	0.0967375
	SF3B5	83443	splicing factor 3b subunit 5	278.69	0.188121	0.0845921	0.00775765	0.0967375
	FNBP4	23360	formin binding protein 4	496.241	-0.216134	0.119602	0.00774078	0.0967375
	S100A8	6279	S100 calcium binding protein A8	5817.79	0.212232	0.321419	0.0078279	0.0972385
	SLC19A1	6573	solute carrier family 19 member 1	1012.92	0.219921	0.160228	0.00786474	0.0974342
	VSIR	64115	V-set immunoregulatory receptor	11153.2	0.219921	0.154407	0.00789378	0.0975325
	LIMK1	3984	LIM domain kinase 1	523.519	0.219158	0.170033	0.00792166	0.097616
	ATF6	22926	activating transcription factor 6	830.346	0.219352	0.16313	0.00795419	0.0977562
	LGALS8	3964	galectin 8	751.052	0.217735	0.185863	0.00798325	0.0978531
	HSPA5	3309	heat shock protein family A (Hsp70) member 5	1680.32	0.215695	0.12136	0.00801312	0.0979593
	YWHAE	7531	tyrosine 3-monooxygenase/tryptophan 5-monooxygenase activation protein epsilon	702.313	0.213769	0.116309	0.00803995	0.098028
	RBM26	64062	RNA binding motif protein 26	374.69	-0.173998	0.0755408	0.00807578	0.0982057
	PPP1R18	170954	protein phosphatase 1 regulatory subunit 18	4495.26	0.218418	0.139306	0.00814558	0.0985359
	RNF10	9921	ring finger protein 10	7021.03	0.211184	0.281101	0.00814083	0.0985359
	SCARF1	8578	scavenger receptor class F member 1	1064.56	0.210603	0.287203	0.00817749	0.0986636
	CLIC1	1192	chloride intracellular channel 1	3432.36	0.217987	0.163093	0.00822701	0.098945
	CYB5R1	51706	cytochrome b5 reductase 1	319.602	0.21727	0.148975	0.00848642	0.098945
	IL10RB	3588	interleukin 10 receptor subunit beta	1198.03	0.217131	0.15636	0.00847598	0.098945
	GNG5	2787	G protein subunit gamma 5	768.201	0.216908	0.137977	0.00849035	0.098945
	FES	2242	FES proto-oncogene, tyrosine kinase	1234.68	0.216809	0.159913	0.00850826	0.098945
	LTB4R	1241	leukotriene B4 receptor	1212.76	0.216546	0.17868	0.00829378	0.098945
	FOSL2	2355	FOS like 2, AP-1 transcription factor subunit	2011.7	0.216359	0.175164	0.00838212	0.098945
	UBE2J1	51465	ubiquitin conjugating enzyme E2 J1	972.271	0.216091	0.184856	0.0082841	0.098945
	JAML	120425	junction adhesion molecule like	8915.26	0.215783	0.129678	0.00852198	0.098945
	SLC66A2			668.026	0.215281	0.182478	0.00846754	0.098945
	AP5B1	91056	adaptor related protein complex 5 subunit beta 1	1800.97	0.214814	0.194219	0.00836799	0.098945
	SOD2	6648	superoxide dismutase 2	21121.9	0.21387	0.200903	0.00843054	0.098945
	ATP6V1C1	528	ATPase H+ transporting V1 subunit C1	447.773	0.212869	0.212969	0.00843222	0.098945
	ARPC1B	10095	actin related protein 2/3 complex subunit 1B	5003.07	0.211203	0.113712	0.00845103	0.098945
	PSTPIP2	9050	proline-serine-threonine phosphatase interacting protein 2	905.8	0.210187	0.275578	0.00829053	0.098945
	HLA-B	3106	major histocompatibility complex, class I, B	75336.7	0.21627	0.133599	0.00854362	0.0989476
	HAGH	3029	hydroxyacylglutathione hydrolase	1766.76	0.206151	0.30664	0.00856579	0.0989563
	KMT2A	4297	lysine methyltransferase 2A	501.781	-0.215729	0.131883	0.0086274	0.0994195
	HSPA6	3310	heat shock protein family A (Hsp70) member 6	1977.31	0.21365	0.186774	0.00869456	0.0996962
	DSTYK	25778	dual serine/threonine and tyrosine protein kinase	212.094	-0.197773	0.0954797	0.00867687	0.0996962
	KIAA0930	23313	KIAA0930	1410.09	0.215875	0.148608	0.00881462	0.100004
	RNASEL	6041	ribonuclease L	553.132	0.215814	0.15157	0.00881302	0.100004
	PLAAT4	5920	phospholipase A and acyltransferase 4	435.471	0.215222	0.164353	0.00878448	0.100004
	TREML2	79865	triggering receptor expressed on myeloid cells like 2	1100.47	0.212587	0.190147	0.00882883	0.100004
	ELOB	6923	elongin B	248.216	0.209749	0.220394	0.00882961	0.100004
	POLD4	57804	DNA polymerase delta 4, accessory subunit	528.404	0.215593	0.14743	0.00888625	0.100399
	S100A6	6277	S100 calcium binding protein A6	3646.9	0.215125	0.145815	0.00900382	0.101063
	GNS	2799	glucosamine (N-acetyl)-6-sulfatase	1877.58	0.214594	0.155185	0.00906147	0.101063
	TCIRG1	10312	T cell immune regulator 1, ATPase H+ transporting V0 subunit a3	4869.88	0.211399	0.119383	0.00905795	0.101063
	TLR2	7097	toll like receptor 2	3167.75	0.20875	0.214095	0.00908472	0.101063
	USF1	7391	upstream transcription factor 1	1009.63	0.205912	0.107473	0.00906942	0.101063
	CHPT1	56994	choline phosphotransferase 1	750.813	0.204551	0.274552	0.00901653	0.101063
	FKBP8	23770	FKBP prolyl isomerase 8	35776.6	0.202	0.300447	0.00910686	0.101063
	NFATC3	4775	nuclear factor of activated T cells 3	740.893	-0.209142	0.113994	0.00911998	0.101063
	MTFR1L	56181	mitochondrial fission regulator 1 like	257.922	-0.200562	0.100576	0.00925122	0.102272
	DDAH2	23564	dimethylarginine dimethylaminohydrolase 2	265.667	0.205841	0.231397	0.00929959	0.102562
	ALAS1	211	5'-aminolevulinate synthase 1	319.029	0.213675	0.14003	0.0093586	0.102777
	AIF1	199	allograft inflammatory factor 1	867.386	0.212479	0.165422	0.00936361	0.102777
	CA1	759	carbonic anhydrase 1	1595.35	0.152885	0.403199	0.00939995	0.102932
	WAS	7454	WASP actin nucleation promoting factor	3740.18	0.213203	0.151529	0.00944377	0.103167
	QPCT	25797	glutaminyl-peptide cyclotransferase	1312.94	0.209052	0.189804	0.00950558	0.103597
	COPE	11316	coatomer protein complex subunit epsilon	1240.93	0.199984	0.101169	0.00961795	0.104575
	ATP6V0D1	9114	ATPase H+ transporting V0 subunit d1	2333.3	0.212468	0.145282	0.00969037	0.104974
	PTTG1IP	754	PTTG1 interacting protein	1781.68	0.211199	0.127414	0.00972278	0.104974
	NFX1	4799	nuclear transcription factor, X-box binding 1	255.326	-0.186603	0.0877485	0.00971968	0.104974
	UBQLN2	29978	ubiquilin 2	474.254	0.212086	0.148981	0.00975957	0.105126
	SLC16A3	9123	solute carrier family 16 member 3	3650.82	0.208003	0.186422	0.00979971	0.105313
	WDR13	64743	WD repeat domain 13	402.753	0.21081	0.150583	0.0100733	0.106214
	APBB1IP	54518	amyloid beta precursor protein binding family B member 1 interacting protein	2922.91	0.210665	0.153492	0.0100576	0.106214
	TALDO1	6888	transaldolase 1	6481.49	0.210633	0.146101	0.0101836	0.106214
	ARL8A	127829	ADP ribosylation factor like GTPase 8A	568.448	0.210587	0.142503	0.0102228	0.106214
	MTRNR2L1	100462977	MT-RNR2 like 1	1261.37	0.2102	0.159756	0.0100328	0.106214
	YIPF4	84272	Yip1 domain family member 4	924.785	0.21012	0.16118	0.0100165	0.106214
	CD53	963	CD53 molecule	5746.73	0.209981	0.142145	0.0103992	0.106214
	B3GNT8	374907	UDP-GlcNAc:betaGal beta-1,3-N-acetylglucosaminyltransferase 8	443.1	0.209573	0.166588	0.0100029	0.106214
	ARHGAP9	64333	Rho GTPase activating protein 9	4218.8	0.209447	0.130004	0.0103879	0.106214
	TMUB2	79089	transmembrane and ubiquitin like domain containing 2	655.289	0.209415	0.125683	0.0101851	0.106214
	TBC1D2	55357	TBC1 domain family member 2	279.066	0.208495	0.124536	0.0104129	0.106214
	GSDMD	79792	gasdermin D	1077.03	0.208271	0.164218	0.0103868	0.106214
	DYNLT1	6993	dynein light chain Tctex-type 1	475.542	0.207827	0.169478	0.0103314	0.106214
	PHF21A	51317	PHD finger protein 21A	796.702	0.20751	0.179949	0.010084	0.106214
	ETS2	2114	ETS proto-oncogene 2, transcription factor	607.514	0.207474	0.17881	0.0101256	0.106214
	MSL3	10943	MSL complex subunit 3	1105.72	0.207194	0.172291	0.0103918	0.106214
	POR	5447	cytochrome p450 oxidoreductase	641.717	0.207111	0.174733	0.0103329	0.106214
	DOK3	79930	docking protein 3	1390.3	0.206556	0.1796	0.0103051	0.106214
	SDHC	6391	succinate dehydrogenase complex subunit C	726.663	0.20566	0.112048	0.00997953	0.106214
	FPR1	2357	formyl peptide receptor 1	11917.1	0.205306	0.190106	0.0102571	0.106214
	SRGN	5552	serglycin	11446.8	0.203548	0.19574	0.0104582	0.106214
	H2AC19			627.795	0.201466	0.234904	0.0099598	0.106214
	TFG	10342	trafficking from ER to golgi regulator	267.882	0.198698	0.102441	0.0104436	0.106214
	SLC25A39	51629	solute carrier family 25 member 39	1265.56	0.192521	0.307879	0.0102172	0.106214
	ATF7IP	55729	activating transcription factor 7 interacting protein	675.165	-0.189716	0.0919117	0.0103263	0.106214
	PLAC8	51316	placenta associated 8	756.885	0.202102	0.205324	0.0104812	0.106214
	CCDC71L	168455	coiled-coil domain containing 71 like	333.831	0.198318	0.232647	0.0105458	0.106257
	SPTB	6710	spectrin beta, erythrocytic	512.673	0.183388	0.345569	0.0105544	0.106257
	DARS1			226.067	-0.198011	0.101859	0.0105441	0.106257
	SPTLC1	10558	serine palmitoyltransferase long chain base subunit 1	378.834	0.201011	0.106739	0.0106407	0.10666
	AUP1	550	AUP1 lipid droplet regulating VLDL assembly factor	670.317	0.156364	0.0685034	0.0106263	0.10666
	PCBP2	5094	poly(rC) binding protein 2	5689.36	0.20083	0.10676	0.0107138	0.10693
	PDZK1IP1	10158	PDZK1 interacting protein 1	687.691	0.193592	0.267976	0.0106921	0.10693
	CUTALP	253039	cutA divalent cation tolerance homolog-like, pseudogene	227.907	-0.2025	0.19059	0.010844	0.107996
	RNF167	26001	ring finger protein 167	738.45	0.204738	0.116997	0.0110213	0.10929
	RAP1A	5906	RAP1A, member of RAS oncogene family	1254.73	0.20244	0.111282	0.0110186	0.10929
	ZDHHC18	84243	zinc finger DHHC-type containing 18	5080.24	0.206125	0.157765	0.011159	0.110419
	MPST	4357	mercaptopyruvate sulfurtransferase	275.299	0.207068	0.140545	0.0112953	0.11114
	RHBDF2	79651	rhomboid 5 homolog 2	1158.51	0.200691	0.189336	0.011295	0.11114
	NFIX	4784	nuclear factor I X	449.557	0.184226	0.310405	0.011304	0.11114
	CYBA	1535	cytochrome b-245 alpha chain	6306.03	0.206626	0.133605	0.0114139	0.111964
	DEFA4	1669	defensin alpha 4	242.9	0.161693	0.373569	0.0114363	0.111964
	FGR	2268	FGR proto-oncogene, Src family tyrosine kinase	6678.37	0.206096	0.137509	0.0116235	0.111969
	DERL1	79139	derlin 1	535.279	0.205123	0.123577	0.0115227	0.111969
	LILRB2	10288	leukocyte immunoglobulin like receptor B2	3026.82	0.200916	0.111484	0.0116494	0.111969
	TLR1	7096	toll like receptor 1	1338.92	0.200477	0.182262	0.0116297	0.111969
	MMP25	64386	matrix metallopeptidase 25	8038.64	0.200206	0.187581	0.0114757	0.111969
	TMEM121B	27439	transmembrane protein 121B	296.842	0.196131	0.206029	0.0117019	0.111969
	MPP1	4354	membrane palmitoylated protein 1	3107.29	0.189002	0.264613	0.0115155	0.111969
	LILRB5	10990	leukocyte immunoglobulin like receptor B5	412.702	0.182861	0.301739	0.0117033	0.111969
	CDKN1C	1028	cyclin dependent kinase inhibitor 1C	234.312	-0.188373	0.262481	0.0116713	0.111969
	PDE3B	5140	phosphodiesterase 3B	369.077	-0.202498	0.115099	0.0116148	0.111969
	PPIG	9360	peptidylprolyl isomerase G	285.708	-0.205536	0.129166	0.0116757	0.111969
	CCDC88A	55704	coiled-coil domain containing 88A	248.123	-0.205625	0.135836	0.0117785	0.112456
	CBFA2T2	9139	CBFA2/RUNX1 translocation partner 2	225.949	-0.200526	0.111765	0.0118576	0.112977
	TKT	7086	transketolase	8006.73	0.204951	0.134645	0.0120043	0.113877
	MBOAT7	79143	membrane bound O-acyltransferase domain containing 7	6152.33	0.203095	0.158387	0.0119991	0.113877
	TLR6	10333	toll like receptor 6	843.476	0.203021	0.157706	0.0120507	0.113877
	TMOD1	7111	tropomodulin 1	509.147	0.170006	0.34696	0.0120356	0.113877
	TBC1D2B	23102	TBC1 domain family member 2B	960.372	0.204234	0.135554	0.012263	0.113982
	ITM2B	9445	integral membrane protein 2B	18198.7	0.204108	0.13749	0.0123049	0.113982
	PSMB10	5699	proteasome subunit beta 10	1294.9	0.204092	0.128883	0.0121912	0.113982
	VAPA	9218	VAMP associated protein A	1194.26	0.200847	0.165778	0.0123023	0.113982
	C4orf3	401152	chromosome 4 open reading frame 3	1024.35	0.199371	0.173789	0.0123084	0.113982
	LILRA6	79168	leukocyte immunoglobulin like receptor A6	2411.51	0.197979	0.183173	0.0122125	0.113982
	SPCS2	9789	signal peptidase complex subunit 2	282.909	0.197516	0.107556	0.0122361	0.113982
	EIF1B	10289	eukaryotic translation initiation factor 1B	686.665	0.193691	0.206464	0.0122289	0.113982
	RPS9	6203	ribosomal protein S9	3930.02	0.191532	0.0984186	0.0121234	0.113982
	YTHDC1	91746	YTH domain containing 1	681.846	-0.175507	0.0833052	0.0121885	0.113982
	PRR13	54458	proline rich 13	2986.58	0.203625	0.134838	0.0124794	0.114647
	APMAP	57136	adipocyte plasma membrane associated protein	2480.81	0.19881	0.173936	0.0124537	0.114647
	PIM1	5292	Pim-1 proto-oncogene, serine/threonine kinase	2986.7	0.195717	0.189593	0.0124774	0.114647
	PARVG	64098	parvin gamma	2028.2	0.17698	0.0848565	0.0124243	0.114647
	KIAA2026	158358	KIAA2026	311.724	-0.200106	0.114735	0.0125271	0.114857
	NFAM1	150372	NFAT activating protein with ITAM motif 1	6678.13	0.202165	0.142598	0.0129052	0.115793
	GLIPR2	152007	GLI pathogenesis related 2	2595.17	0.201074	0.152013	0.012917	0.115793
	HTATIP2	10553	HIV-1 Tat interactive protein 2	404.848	0.200992	0.151264	0.0129791	0.115793
	FRAT1	10023	FRAT regulator of WNT signaling pathway 1	1246.34	0.199972	0.163621	0.012669	0.115793
	PLIN3	10226	perilipin 3	970.048	0.199438	0.161273	0.0129583	0.115793
	GLT1D1	144423	glycosyltransferase 1 domain containing 1	1321.99	0.195186	0.185243	0.0128321	0.115793
	DEDD	9191	death effector domain containing	412.594	0.19344	0.103646	0.0130003	0.115793
	MARCHF2			941.417	0.193352	0.192549	0.0129302	0.115793
	SNX3	8724	sorting nexin 3	439.715	0.188489	0.223549	0.0127445	0.115793
	DENND4B	9909	DENN domain containing 4B	1255.22	0.185402	0.0935911	0.0129834	0.115793
	PCGF5	84333	polycomb group ring finger 5	1878.21	0.181767	0.267779	0.0127366	0.115793
	MYL4	4635	myosin light chain 4	418.826	0.175586	0.29843	0.012956	0.115793
	GLRX5	51218	glutaredoxin 5	1515.33	0.171336	0.317534	0.013005	0.115793
	DDX46	9879	DEAD-box helicase 46	542.053	-0.185799	0.093622	0.0128054	0.115793
	CD28	940	CD28 molecule	244.253	-0.199456	0.165442	0.0127236	0.115793
	NLRC5	84166	NLR family CARD domain containing 5	1373.7	0.201927	0.129887	0.0130494	0.115825
	RHOG	391	ras homolog family member G	3412	0.199789	0.156973	0.0130839	0.115825
	DNASE2	1777	deoxyribonuclease 2, lysosomal	340.434	0.198158	0.113005	0.0130782	0.115825
	RAB1A	5861	RAB1A, member RAS oncogene family	806.051	0.201818	0.136576	0.0131437	0.115911
	GNB2	2783	G protein subunit beta 2	4097.77	0.200144	0.154125	0.013119	0.115911
	UBE2D3	7323	ubiquitin conjugating enzyme E2 D3	3200.71	0.200208	0.151527	0.0132291	0.11617
	UBE2D1	7321	ubiquitin conjugating enzyme E2 D1	848.311	0.192617	0.190837	0.0132095	0.11617
	GPAT4	137964	glycerol-3-phosphate acyltransferase 4	512.034	0.192094	0.102431	0.0132486	0.11617
	CTDNEP1	23399	CTD nuclear envelope phosphatase 1	900.538	0.200072	0.122456	0.0134302	0.117245
	OAT	4942	ornithine aminotransferase	271.038	0.196406	0.110943	0.0134726	0.117245
	CD82	3732	CD82 molecule	1238.22	0.196098	0.170147	0.0134483	0.117245
	SIRPB1	10326	signal regulatory protein beta 1	1950.1	0.195526	0.172759	0.0134555	0.117245
	TFE3	7030	transcription factor binding to IGHM enhancer 3	1583.86	0.200582	0.140911	0.013527	0.11732
	PPM1A	5494	protein phosphatase, Mg2+/Mn2+ dependent 1A	1470.47	0.188155	0.206733	0.013532	0.11732
	IMPDH1	3614	inosine monophosphate dehydrogenase 1	936.034	0.199896	0.145404	0.0136212	0.117408
	ABHD16A	7920	abhydrolase domain containing 16A	547.881	0.19976	0.123545	0.0136438	0.117408
	ARHGAP27	201176	Rho GTPase activating protein 27	2926.66	0.199611	0.12242	0.0136244	0.117408
	FKBP5	2289	FKBP prolyl isomerase 5	2146.9	0.179457	0.253982	0.0136167	0.117408
	HNRNPH2	3188	heterogeneous nuclear ribonucleoprotein H2	1038.71	0.199644	0.145976	0.0136881	0.11757
	TNFAIP6	7130	TNF alpha induced protein 6	340.281	0.173478	0.285336	0.0137532	0.117692
	TES	26136	testin LIM domain protein	675.067	-0.171613	0.0825798	0.0137348	0.117692
	EFHD2	79180	EF-hand domain family member D2	6655.76	0.198959	0.145295	0.0139701	0.118888
	MBD1	4152	methyl-CpG binding domain protein 1	485.267	0.164464	0.0775608	0.0139416	0.118888
	ARID1B	57492	AT-rich interaction domain 1B	367.016	-0.191459	0.103726	0.0139661	0.118888
	H2BC21			454.614	0.18583	0.208752	0.0140153	0.119053
	CDKN2D	1032	cyclin dependent kinase inhibitor 2D	1025.88	0.190004	0.188171	0.0140748	0.119339
	UBC	7316	ubiquitin C	15856	0.194099	0.109729	0.0142966	0.120886
	METTL9	51108	methyltransferase like 9	1465.51	0.186658	0.199468	0.0143096	0.120886
	DGCR2	9993	DiGeorge syndrome critical region gene 2	289.924	0.197661	0.140025	0.0146915	0.122766
	TYROBP	7305	TYRO protein tyrosine kinase binding protein	4807.14	0.197515	0.14188	0.0146771	0.122766
	CLASRP	11129	CLK4 associating serine/arginine rich protein	520.277	0.196182	0.117439	0.0146597	0.122766
	UBE2L6	9246	ubiquitin conjugating enzyme E2 L6	2263.53	0.185013	0.201824	0.0146162	0.122766
	KXD1	79036	KxDL motif containing 1	521.274	0.149535	0.0685697	0.0146386	0.122766
	SLC25A29	123096	solute carrier family 25 member 29	244.178	-0.193974	0.163145	0.0146071	0.122766
	LITAF	9516	lipopolysaccharide induced TNF factor	12643.1	0.189175	0.180956	0.0148101	0.123534
	GCH1	2643	GTP cyclohydrolase 1	238.774	0.170512	0.269031	0.0149564	0.124529
	GLUL	2752	glutamate-ammonia ligase	6293.21	0.193437	0.157391	0.0152403	0.126665
	AL669831.1			7613.25	0.190277	0.170255	0.0152955	0.126895
	MYL12A	10627	myosin light chain 12A	3018.66	0.196125	0.126714	0.0154383	0.127236
	CASP1	834	caspase 1	1797.54	0.19206	0.160366	0.0155018	0.127236
	RPL21P16	729402	ribosomal protein L21 pseudogene 16	300.236	0.171778	0.250269	0.0154798	0.127236
	EPB42	2038	erythrocyte membrane protein band 4.2	1312.14	0.156483	0.317699	0.0154089	0.127236
	LARS1			298.514	-0.196256	0.133074	0.0154575	0.127236
	AHR	196	aryl hydrocarbon receptor	240.058	-0.19629	0.129734	0.0154361	0.127236
	RBCK1	10616	RANBP2-type and C3HC4-type zinc finger containing 1	1400.6	0.196041	0.133142	0.015553	0.12743
	STX10	8677	syntaxin 10	784.992	0.195851	0.128895	0.0156255	0.127797
	PPP2R5B	5526	protein phosphatase 2 regulatory subunit B'beta	296.739	0.184501	0.188623	0.0156694	0.127812
	NLRP6	171389	NLR family pyrin domain containing 6	275.556	0.173707	0.236314	0.0156826	0.127812
	ZC3H12A	80149	zinc finger CCCH-type containing 12A	264.224	0.194952	0.138958	0.0158754	0.128133
	MLF2	8079	myeloid leukemia factor 2	1090.58	0.194632	0.120951	0.0157984	0.128133
	H3-3B			9017.99	0.190689	0.162882	0.0157845	0.128133
	TNFAIP8L2	79626	TNF alpha induced protein 8 like 2	507.644	0.183818	0.0980478	0.01586	0.128133
	GSPT1	2935	G1 to S phase transition 1	3325.83	0.165267	0.275034	0.0158423	0.128133
	SEC13	6396	SEC13 homolog, nuclear pore and COPII coat complex component	395.836	0.150428	0.0702646	0.0158931	0.128133
	MEF2C	4208	myocyte enhancer factor 2C	347.363	-0.194223	0.144033	0.0159161	0.128133
	AC040162.1			234.722	0.194828	0.12581	0.0160206	0.128531
	CTSB	1508	cathepsin B	3636.38	0.188011	0.170872	0.0160212	0.128531
	MBNL3	55796	muscleblind like splicing regulator 3	894.257	0.171606	0.237996	0.0161331	0.129205
	BSG	682	basigin (Ok blood group)	7816.56	0.169979	0.244481	0.0162074	0.129575
	EHD1	10938	EH domain containing 1	3475.27	0.193397	0.144439	0.0162413	0.129622
	RNASEK	440400	ribonuclease K	2041.08	0.193106	0.119056	0.01638	0.130503
	ATP6V0C	527	ATPase H+ transporting V0 subunit c	4254.24	0.182637	0.185927	0.0164876	0.131134
	ARID5A	10865	AT-rich interaction domain 5A	722.291	0.185287	0.17482	0.0166092	0.131199
	LYL1	4066	LYL1 basic helix-loop-helix family member	1704.86	0.174429	0.217138	0.0166074	0.131199
	PTGER4	5734	prostaglandin E receptor 4	361.819	-0.182731	0.0982618	0.0165835	0.131199
	PRPF4B	8899	pre-mRNA processing factor 4B	230.899	-0.192358	0.145772	0.0165935	0.131199
	EIF1	10209	eukaryotic translation initiation factor 1	5455.61	0.185999	0.170883	0.0167391	0.131999
	YIPF3	25844	Yip1 domain family member 3	1192.77	0.193215	0.124676	0.0167721	0.132034
	IDI1	3422	isopentenyl-diphosphate delta isomerase 1	338.824	0.178528	0.196902	0.0168769	0.132068
	PLSCR1	5359	phospholipid scramblase 1	904.889	0.168401	0.239574	0.0168907	0.132068
	MTCO1P12	107075141	MT-CO1 pseudogene 12	269.863	0.10486	0.339302	0.0168844	0.132068
	TRIB2	28951	tribbles pseudokinase 2	307.435	-0.189638	0.156218	0.0168096	0.132068
	AURKAIP1	54998	aurora kinase A interacting protein 1	503.733	0.193036	0.128377	0.0169789	0.132087
	RAB27A	5873	RAB27A, member RAS oncogene family	1404.29	0.19219	0.142093	0.0169327	0.132087
	ZMYND8	23613	zinc finger MYND-type containing 8	252.409	-0.178357	0.0938001	0.0169579	0.132087
	ZNF319	57567	zinc finger protein 319	289.855	0.192371	0.137522	0.0171187	0.132728
	DDX60L	91351	DExD/H-box 60 like	729.275	0.17605	0.203586	0.0171127	0.132728
	RFXANK	8625	regulatory factor X associated ankyrin containing protein	317.618	0.192365	0.123687	0.0171589	0.132817
	DNASE1L1	1774	deoxyribonuclease 1 like 1	373.471	0.187006	0.106738	0.0172858	0.133574
	NDEL1	81565	nudE neurodevelopment protein 1 like 1	309.341	0.190299	0.147146	0.0173861	0.133873
	UBE2R2	54926	ubiquitin conjugating enzyme E2 R2	1801.4	0.189612	0.150423	0.0173848	0.133873
	HDAC4	9759	histone deacetylase 4	567.5	0.188867	0.153111	0.0174403	0.133873
	ZNF641	121274	zinc finger protein 641	773.154	0.187708	0.157972	0.0174202	0.133873
	RILPL2	196383	Rab interacting lysosomal protein like 2	1314.68	0.191721	0.13368	0.0175911	0.134002
	FERMT3	83706	fermitin family member 3	2321.29	0.191391	0.128829	0.0178282	0.134002
	CHMP2A	27243	charged multivesicular body protein 2A	1505.01	0.191371	0.130671	0.0178326	0.134002
	APBB3	10307	amyloid beta precursor protein binding family B member 3	231.527	0.191354	0.132999	0.0177961	0.134002
	RTF2	51507	replication termination factor 2	1574.36	0.191289	0.123593	0.0177261	0.134002
	IFNGR2	3460	interferon gamma receptor 2	1681.62	0.18976	0.144868	0.0178341	0.134002
	GPSM3	63940	G protein signaling modulator 3	5092.64	0.189339	0.147439	0.0177924	0.134002
	CXCR1	3577	C-X-C motif chemokine receptor 1	8385.9	0.182949	0.172174	0.0177407	0.134002
	TINF2	26277	TERF1 interacting nuclear factor 2	660.657	0.18181	0.0991842	0.0175577	0.134002
	PFKFB2	5208	6-phosphofructo-2-kinase/fructose-2,6-biphosphatase 2	289.642	0.16173	0.255825	0.0177162	0.134002
	SNCA	6622	synuclein alpha	4042.93	0.146318	0.312415	0.0176103	0.134002
	DEFA3	1668	defensin alpha 3	4980.03	0.130332	0.336325	0.0175917	0.134002
	CBX5	23468	chromobox 5	292.444	-0.191423	0.123201	0.0176301	0.134002
	SSR2	6746	signal sequence receptor subunit 2	1076.55	0.180096	0.0976037	0.0178761	0.1341
	DDX21	9188	DExD-box helicase 21	489.248	-0.174735	0.0915505	0.0179189	0.134203
	DNAJB12	54788	DnaJ heat shock protein family (Hsp40) member B12	575.32	0.185409	0.106034	0.0180148	0.134703
	TP53I11	9537	tumor protein p53 inducible protein 11	1076.96	0.184526	0.163899	0.0180631	0.134846
	HLA-A	3105	major histocompatibility complex, class I, A	36313.6	0.184161	0.164427	0.0181506	0.135157
	UGCG	7357	UDP-glucose ceramide glucosyltransferase	313.737	0.176031	0.191918	0.0181633	0.135157
	RPS6KA1	6195	ribosomal protein S6 kinase A1	2942.37	0.190579	0.126829	0.0182359	0.135479
	NONO	4841	non-POU domain containing octamer binding	257.449	-0.189832	0.138276	0.0183136	0.135838
	LCP1	3936	lymphocyte cytosolic protein 1	23339.9	0.189784	0.134533	0.0185478	0.136697
	CIDEB	27141	cell death inducing DFFA like effector b	431.227	0.187035	0.111358	0.0185017	0.136697
	IL1R2	7850	interleukin 1 receptor type 2	1026.96	0.156605	0.264803	0.0185198	0.136697
	SERPING1	710	serpin family G member 1	1020.8	0.144501	0.30561	0.0185256	0.136697
	DEGS1	8560	delta 4-desaturase, sphingolipid 1	487.978	0.184928	0.107493	0.0187677	0.137224
	PFKFB4	5210	6-phosphofructo-2-kinase/fructose-2,6-biphosphatase 4	952.385	0.183928	0.161027	0.0186607	0.137224
	DNASE1	1773	deoxyribonuclease 1	256.009	0.182698	0.103337	0.0187471	0.137224
	SCAND1	51282	SCAN domain containing 1	271.19	0.171961	0.089912	0.0186941	0.137224
	TRIM58	25893	tripartite motif containing 58	3698.92	0.145056	0.301818	0.0187184	0.137224
	DHRS9	10170	dehydrogenase/reductase 9	312.068	0.17052	0.204926	0.018798	0.137228
	JTB	10899	jumping translocation breakpoint	833.193	0.189406	0.130151	0.0188847	0.137644
	RGS19	10287	regulator of G protein signaling 19	1797.73	0.188344	0.140065	0.0189343	0.137648
	MAN2A2	4122	mannosidase alpha class 2A member 2	1689.17	0.184417	0.157043	0.0189448	0.137648
	PSENEN	55851	presenilin enhancer, gamma-secretase subunit	383.171	0.188799	0.13501	0.0190435	0.13803
	STRADB	55437	STE20 related adaptor beta	3382.87	0.146348	0.293923	0.0190571	0.13803
	AL732372.2			3288.68	0.178766	0.174136	0.0191484	0.138206
	UBXN6	80700	UBX domain protein 6	283.198	0.146964	0.291199	0.0191238	0.138206
	TNS1	7145	tensin 1	1095.04	0.145153	0.295989	0.0191712	0.138206
	GZMH	2999	granzyme H	473.454	0.179087	0.172203	0.0192653	0.138453
	OSBP2	23762	oxysterol binding protein 2	981.061	0.140671	0.306679	0.0192389	0.138453
	USP11	8237	ubiquitin specific peptidase 11	231.139	-0.187781	0.118834	0.0193296	0.138699
	SUSD6	9766	sushi domain containing 6	1961.67	0.1881	0.134625	0.0194402	0.139276
	FAS	355	Fas cell surface death receptor	506.35	0.168651	0.204628	0.0194718	0.139286
	ZYX	7791	zyxin	299.831	0.183149	0.157043	0.0195215	0.139426
	VDR	7421	vitamin D receptor	277.267	0.187485	0.137618	0.019576	0.139437
	CYRIB			2378.46	0.187397	0.138134	0.0195834	0.139437
	ORAI2	80228	ORAI calcium release-activated calcium modulator 2	1900.64	0.186784	0.140629	0.0196931	0.139844
	AC012435.2			263.226	0.157962	0.242495	0.019701	0.139844
	ARSA	410	arylsulfatase A	433.529	0.186499	0.140642	0.0198421	0.140264
	DBNL	28988	drebrin like	2972.71	0.186311	0.116144	0.0198715	0.140264
	RBM47	54502	RNA binding motif protein 47	763.081	0.181943	0.158488	0.0198816	0.140264
	PSIP1	11168	PC4 and SFRS1 interacting protein 1	428.43	-0.174584	0.0944958	0.0198459	0.140264
	INTS3	65123	integrator complex subunit 3	720.972	0.181394	0.104401	0.020006	0.140804
	AKT1S1	84335	AKT1 substrate 1	331.189	0.172191	0.187944	0.0200191	0.140804
	TGFB1	7040	transforming growth factor beta 1	4893.39	0.187086	0.131255	0.0201601	0.141557
	RNMT	8731	RNA guanine-7 methyltransferase	256.773	-0.186208	0.13859	0.0201874	0.141557
	RER1	11079	retention in endoplasmic reticulum sorting receptor 1	999.688	0.177668	0.0991628	0.0202628	0.14187
	SLC2A1	6513	solute carrier family 2 member 1	731.179	0.144425	0.284174	0.0203328	0.142145
	SDF2	6388	stromal cell derived factor 2	305.79	0.186615	0.125665	0.0204868	0.142335
	PTPN1	5770	protein tyrosine phosphatase non-receptor type 1	798.663	0.186532	0.129479	0.0205334	0.142335
	THEMIS2	9473	thymocyte selection associated family member 2	4339.92	0.186272	0.132403	0.0205836	0.142335
	ITPRIP	85450	inositol 1,4,5-trisphosphate receptor interacting protein	1249.72	0.183045	0.150859	0.020412	0.142335
	TMEM120A	83862	transmembrane protein 120A	498.077	0.182905	0.150957	0.0204689	0.142335
	PEAK3	374872	PEAK family member 3	417.726	0.177136	0.168566	0.0206064	0.142335
	CR1	1378	complement C3b/C4b receptor 1 (Knops blood group)	1618.66	0.16952	0.192688	0.0204739	0.142335
	POU2F1	5451	POU class 2 homeobox 1	230.51	-0.186307	0.132013	0.0205816	0.142335
	MTRNR2L8	100463486	MT-RNR2 like 8	4544.05	0.183745	0.145963	0.0207031	0.142577
	KRT23	25984	keratin 23	913.283	0.165371	0.204297	0.0206919	0.142577
	SURF1	6834	SURF1 cytochrome c oxidase assembly factor	243.988	0.170986	0.0919372	0.0207924	0.142979
	NMI	9111	N-myc and STAT interactor	800.84	0.178067	0.164268	0.020832	0.142993
	ANK1	286	ankyrin 1	621.232	0.137953	0.29635	0.0208564	0.142993
	FOXP1	27086	forkhead box P1	535.421	-0.176018	0.0981848	0.0209279	0.143271
	SELPLG	6404	selectin P ligand	5776.98	0.185267	0.135225	0.0209933	0.143506
	PGK1	5230	phosphoglycerate kinase 1	3725.58	0.185533	0.131041	0.0210814	0.143895
	FAM160B1	57700	family with sequence similarity 160 member B1	426.241	0.181504	0.150923	0.0211909	0.144005
	IFI30	10437	IFI30 lysosomal thiol reductase	6912.99	0.18043	0.154667	0.021175	0.144005
	CEP350	9857	centrosomal protein 350	331.333	-0.185585	0.127565	0.0211314	0.144005
	CTSD	1509	cathepsin D	5921.65	0.185315	0.130718	0.0212255	0.144028
	WDFY3	23001	WD repeat and FYVE domain containing 3	785.875	0.170669	0.183005	0.0212923	0.144269
	NPC2	10577	NPC intracellular cholesterol transporter 2	1251.47	0.185246	0.126564	0.0213423	0.144396
	SLC24A4	123041	solute carrier family 24 member 4	446.068	0.185102	0.129019	0.0214085	0.144421
	PRPF40A	55660	pre-mRNA processing factor 40 homolog A	398.827	-0.180945	0.107469	0.0213953	0.144421
	PRKCD	5580	protein kinase C delta	2646.56	0.184018	0.136991	0.0215734	0.144899
	P2RY13	53829	purinergic receptor P2Y13	2666.41	0.181469	0.148465	0.0215731	0.144899
	COL18A1	80781	collagen type XVIII alpha 1 chain	936.963	0.174191	0.171102	0.0215478	0.144899
	NPTN	27020	neuroplastin	710.699	0.183977	0.118137	0.0216593	0.145265
	MAP1LC3B	81631	microtubule associated protein 1 light chain 3 beta	1257.25	0.176852	0.161857	0.0217994	0.145993
	TMEM167B	56900	transmembrane protein 167B	696.282	0.183684	0.135832	0.0218781	0.146301
	SLC14A1	6563	solute carrier family 14 member 1 (Kidd blood group)	533.497	0.128532	0.306162	0.0219088	0.146301
	MYCBP	26292	MYC binding protein	216.845	0.181735	0.112629	0.0222563	0.148408
	XRN2	22803	5'-3' exoribonuclease 2	1034.73	0.182647	0.116441	0.0223323	0.148699
	AGPAT2	10555	1-acylglycerol-3-phosphate O-acyltransferase 2	369.368	0.182631	0.136903	0.0224116	0.149013
	SLFN5	162394	schlafen family member 5	698.825	-0.18264	0.135936	0.0225026	0.149403
	EIF2S3	1968	eukaryotic translation initiation factor 2 subunit gamma	1293.75	-0.157572	0.0815266	0.0225796	0.149699
	ZDHHC12	84885	zinc finger DHHC-type containing 12	315.325	0.183094	0.127407	0.0227202	0.150119
	RASGRP4	115727	RAS guanyl releasing protein 4	2208.37	0.178201	0.152424	0.0227135	0.150119
	NUDT16	131870	nudix hydrolase 16	550.521	0.177405	0.154744	0.0227404	0.150119
	TRAFD1	10906	TRAF-type zinc finger domain containing 1	1207.72	0.177358	0.154544	0.022801	0.150304
	RXRB	6257	retinoid X receptor beta	556.275	0.169854	0.0937131	0.0228901	0.150677
	SPI1	6688	Spi-1 proto-oncogene	8209.82	0.177016	0.154307	0.0230296	0.150682
	SNX10	29887	sorting nexin 10	907.576	0.175298	0.158521	0.0231844	0.150682
	ICAM3	3385	intercellular adhesion molecule 3	876.597	0.174828	0.159951	0.0231673	0.150682
	PHC2	1912	polyhomeotic homolog 2	3769.83	0.168023	0.178859	0.0231149	0.150682
	AC000093.1			253.781	0.165625	0.185133	0.0231713	0.150682
	APOL6	80830	apolipoprotein L6	1903.33	0.162737	0.194014	0.0230688	0.150682
	FIS1	51024	fission, mitochondrial 1	711.765	0.15926	0.205224	0.0229625	0.150682
	IFIT1	3434	interferon induced protein with tetratricopeptide repeats 1	518.073	-0.145871	0.24837	0.0231581	0.150682
	SYNRG	11276	synergin gamma	634.447	-0.155659	0.0804346	0.0230803	0.150682
	JAK2	3717	Janus kinase 2	577.677	0.170479	0.170786	0.0233681	0.151663
	ILK	3611	integrin linked kinase	1060.4	0.180877	0.115834	0.0234934	0.152262
	PPP1R10	5514	protein phosphatase 1 regulatory subunit 10	523.529	0.17893	0.110161	0.0236822	0.152618
	KIF1B	23095	kinesin family member 1B	496.087	0.173879	0.159741	0.0237135	0.152618
	CCNDBP1	23582	cyclin D1 binding protein 1	1556.65	0.169256	0.172381	0.023678	0.152618
	CNOT6	57472	CCR4-NOT transcription complex subunit 6	242.479	-0.167134	0.091622	0.023593	0.152618
	HLA-DQB1	3119	major histocompatibility complex, class II, DQ beta 1	1445.26	-0.167739	0.176692	0.023629	0.152618
	HPS1	3257	HPS1 biogenesis of lysosomal organelles complex 3 subunit 1	1009.15	0.158595	0.198607	0.0241839	0.155429
	FUT7	2529	fucosyltransferase 7	559.821	0.165513	0.179077	0.0242721	0.15578
	GRK6	2870	G protein-coupled receptor kinase 6	1928.55	0.180068	0.132127	0.024518	0.15611
	TM9SF2	9375	transmembrane 9 superfamily member 2	1927.98	0.178716	0.11215	0.0243662	0.15611
	FNDC3B	64778	fibronectin type III domain containing 3B	613.54	0.17208	0.160428	0.0245601	0.15611
	BCL2L1	598	BCL2 like 1	6514.99	0.141662	0.25014	0.0244794	0.15611
	MXI1	4601	MAX interactor 1, dimerization protein	807.334	0.135102	0.270281	0.0244867	0.15611
	SERINC5	256987	serine incorporator 5	348.951	-0.174782	0.103581	0.0245376	0.15611
	RAPGEF6	51735	Rap guanine nucleotide exchange factor 6	319.849	-0.17784	0.110065	0.0244902	0.15611
	ANKRD27	84079	ankyrin repeat domain 27	243.53	-0.173593	0.101696	0.0246106	0.156217
	AL732372.3			601.462	0.170148	0.163412	0.0250027	0.157838
	SRXN1	140809	sulfiredoxin 1	881.44	0.15951	0.191402	0.0249362	0.157838
	TAF1	6872	TATA-box binding protein associated factor 1	291.344	-0.171282	0.0988456	0.0249847	0.157838
	ZNF587	84914	zinc finger protein 587	345.429	-0.173046	0.155763	0.0249868	0.157838
	XRN1	54464	5'-3' exoribonuclease 1	823.509	0.166601	0.171894	0.0251268	0.158405
	SNAP23	8773	synaptosome associated protein 23	1490.12	0.179073	0.119689	0.0253272	0.159451
	TADA3	10474	transcriptional adaptor 3	785.69	0.175034	0.106041	0.025367	0.159485
	HPCAL1	3241	hippocalcin like 1	876.578	0.179077	0.121102	0.0254326	0.159619
	ZFAND3	60685	zinc finger AN1-type containing 3	1142.31	0.178838	0.131138	0.0254575	0.159619
	TSPAN5	10098	tetraspanin 5	540.378	0.145567	0.228963	0.0255017	0.15968
	ACTR3	10096	actin related protein 3	3630.06	0.177736	0.114086	0.0255588	0.15982
	ATP6AP2	10159	ATPase H+ transporting accessory protein 2	1073.5	0.170554	0.0988564	0.0256077	0.159877
	CDS2	8760	CDP-diacylglycerol synthase 2	1145.91	0.164933	0.173657	0.025637	0.159877
	RXRA	6256	retinoid X receptor alpha	3357.93	0.177452	0.137587	0.025672	0.159879
	RIT1	6016	Ras like without CAAX 1	544.185	0.175751	0.143498	0.0258145	0.160275
	TRIM69	140691	tripartite motif containing 69	560.317	0.175166	0.145352	0.0258396	0.160275
	XPO6	23214	exportin 6	7785.11	0.170771	0.158233	0.0257816	0.160275
	G6PD	2539	glucose-6-phosphate dehydrogenase	1767.24	0.177452	0.135725	0.0259349	0.160538
	IST1	9798	IST1 factor associated with ESCRT-III	970.098	0.160343	0.0874142	0.0259756	0.160538
	PHC3	80012	polyhomeotic homolog 3	481.609	-0.168682	0.0968555	0.0259863	0.160538
	GZMB	3002	granzyme B	559.606	-0.16123	0.180743	0.026095	0.16078
	ETS1	2113	ETS proto-oncogene 1, transcription factor	2233.82	-0.175638	0.14255	0.0260667	0.16078
	FBXO6	26270	F-box protein 6	233.416	0.158045	0.188684	0.0261353	0.160814
	IDH1	3417	isocitrate dehydrogenase (NADP(+)) 1, cytosolic	338.916	0.177998	0.126347	0.0263435	0.161422
	DNAJC5	80331	DnaJ heat shock protein family (Hsp40) member C5	1716.11	0.177812	0.126587	0.026478	0.161422
	TOM1	10043	target of myb1 membrane trafficking protein	850.573	0.177675	0.122322	0.0265748	0.161422
	GOLGA7	51125	golgin A7	579.111	0.175676	0.110737	0.0264208	0.161422
	CDC42	998	cell division cycle 42	3323.23	0.172434	0.103686	0.0265422	0.161422
	PLXNC1	10154	plexin C1	3428.68	0.171384	0.153735	0.0264351	0.161422
	SYNGR2	9144	synaptogyrin 2	1110.98	0.163138	0.0909682	0.0265737	0.161422
	IRF2BPL	64207	interferon regulatory factor 2 binding protein like	810.4	0.161475	0.177858	0.0265745	0.161422
	SLC1A5	6510	solute carrier family 1 member 5	801.977	0.14609	0.219545	0.0265834	0.161422
	SPN	6693	sialophorin	1272.62	-0.174254	0.145001	0.0265106	0.161422
	CYHR1	50626	cysteine and histidine rich 1	751.595	0.171872	0.103375	0.0268833	0.162177
	BEST1	7439	bestrophin 1	631.99	0.170979	0.152999	0.0268618	0.162177
	AC010507.2			624.875	0.155866	0.191138	0.0267514	0.162177
	TTC17	55761	tetratricopeptide repeat domain 17	311.265	-0.173787	0.107257	0.0268757	0.162177
	HP1BP3	50809	heterochromatin protein 1 binding protein 3	491.294	-0.176182	0.114033	0.0268038	0.162177
	ALOX5AP	241	arachidonate 5-lipoxygenase activating protein	3086.77	0.166606	0.163709	0.0269573	0.162412
	ATXN1	6310	ataxin 1	606.694	0.174634	0.140886	0.0270678	0.162442
	ATG3	64422	autophagy related 3	738.322	0.172463	0.148162	0.0270188	0.162442
	SAT1	6303	spermidine/spermine N1-acetyltransferase 1	4267.24	0.16801	0.159805	0.0270659	0.162442
	NSFL1C	55968	NSFL1 cofactor	885.441	0.177018	0.123576	0.027123	0.162562
	MR1	3140	major histocompatibility complex, class I-related	438.014	0.176801	0.120561	0.0271768	0.162647
	HSPA1A	3303	heat shock protein family A (Hsp70) member 1A	3515.4	0.160878	0.176459	0.0272075	0.162647
	DGAT2	84649	diacylglycerol O-acyltransferase 2	463.229	0.158459	0.182095	0.0272637	0.162772
	LEF1	51176	lymphoid enhancer binding factor 1	512.7	-0.16439	0.167141	0.0274237	0.163516
	EMC3	55831	ER membrane protein complex subunit 3	805.202	0.151008	0.200182	0.0274636	0.163543
	MGAT1	4245	mannosyl (alpha-1,3-)-glycoprotein beta-1,2-N-acetylglucosaminyltransferase	2728.15	0.170516	0.10248	0.0276418	0.164249
	ACTR1A	10121	actin related protein 1A	923.456	0.168462	0.0991803	0.0276532	0.164249
	CNPY3	10695	canopy FGF signaling regulator 3	2058.58	0.170054	0.101796	0.0277002	0.164317
	DOCK4	9732	dedicator of cytokinesis 4	224.018	0.139625	0.230546	0.0278393	0.16493
	FZR1	51343	fizzy and cell division cycle 20 related 1	519.45	0.164007	0.166147	0.0278984	0.165068
	TEP1	7011	telomerase associated protein 1	273.553	0.175405	0.117556	0.028038	0.165471
	CREG1	8804	cellular repressor of E1A stimulated genes 1	973.789	0.1496	0.201026	0.0280078	0.165471
	MOB2	81532	MOB kinase activator 2	303.527	0.175324	0.118218	0.0281851	0.165704
	RAD23B	5887	RAD23 homolog B, nucleotide excision repair protein	907.113	0.173976	0.111675	0.0281225	0.165704
	C1orf43	25912	chromosome 1 open reading frame 43	782.973	0.166491	0.0971488	0.0281703	0.165704
	STEAP4	79689	STEAP4 metalloreductase	2992.45	0.16734	0.1565	0.0283265	0.166091
	ZER1	10444	zyg-11 related cell cycle regulator	1239.76	0.155452	0.184488	0.0283574	0.166091
	PRKAR2B	5577	protein kinase cAMP-dependent type II regulatory subunit beta	369.679	0.153669	0.188843	0.0283587	0.166091
	GPR65	8477	G protein-coupled receptor 65	419.182	0.170498	0.147273	0.0285691	0.167111
	ELOVL1	64834	ELOVL fatty acid elongase 1	515.962	0.160213	0.0901167	0.0286247	0.167225
	CDC123	8872	cell division cycle 123	543.826	0.174881	0.124579	0.028854	0.168086
	YY1AP1	55249	YY1 associated protein 1	1173.9	0.172347	0.140373	0.0288244	0.168086
	PIM2	11040	Pim-2 proto-oncogene, serine/threonine kinase	1446.26	0.17169	0.107669	0.0288812	0.168086
	CNEP1R1	255919	CTD nuclear envelope phosphatase 1 regulatory subunit 1	305.508	0.169935	0.146887	0.0290641	0.168605
	LMTK2	22853	lemur tyrosine kinase 2	410.651	0.167806	0.15251	0.0290799	0.168605
	TRIM21	6737	tripartite motif containing 21	1051.71	0.167	0.154702	0.0290335	0.168605
	GAB2	9846	GRB2 associated binding protein 2	1690.48	0.169041	0.148664	0.0292436	0.169342
	MSL1	339287	MSL complex subunit 1	3335.21	0.172184	0.13856	0.0293234	0.169591
	CCL5	6352	C-C motif chemokine ligand 5	2501.17	0.172076	0.138356	0.0294485	0.170102
	PSMF1	9491	proteasome inhibitor subunit 1	2759.07	0.14639	0.201122	0.0296447	0.171021
	RNF40	9810	ring finger protein 40	896.527	0.17371	0.120666	0.0297784	0.171579
	ZBTB7B	51043	zinc finger and BTB domain containing 7B	2158.53	0.169329	0.145119	0.0299574	0.172395
	HM13	81502	histocompatibility minor 13	1155.89	0.173318	0.121945	0.0301756	0.172443
	PHF23	79142	PHD finger protein 23	421.237	0.173088	0.120238	0.0303012	0.172443
	CSNK1D	1453	casein kinase 1 delta	847.669	0.170652	0.140084	0.0301798	0.172443
	TNFRSF10C	8794	TNF receptor superfamily member 10c	4435.03	0.169757	0.143083	0.0301518	0.172443
	TOX4	9878	TOX high mobility group box family member 4	734.369	0.169461	0.105877	0.030233	0.172443
	NCF1C	654817	neutrophil cytosolic factor 1C pseudogene	3726.03	0.167864	0.147618	0.0303778	0.172443
	NFKBIA	4792	NFKB inhibitor alpha	1312.73	0.166724	0.151539	0.0301061	0.172443
	TBCC	6903	tubulin folding cofactor C	277.381	0.166694	0.100757	0.0302779	0.172443
	CTBS	1486	chitobiase	748.435	0.166556	0.15109	0.0303544	0.172443
	CARD16	114769	caspase recruitment domain family member 16	261.021	0.153148	0.182557	0.0301211	0.172443
	ASPH	444	aspartate beta-hydroxylase	271.583	0.13853	0.218619	0.030335	0.172443
	IGHD	3495	immunoglobulin heavy constant delta	401.881	-0.14535	0.200123	0.0304136	0.172443
	IQCE	23288	IQ motif containing E	221.405	0.168424	0.145046	0.0306586	0.173619
	TRAPPC1	58485	trafficking protein particle complex 1	897.174	0.167784	0.103611	0.0307847	0.173774
	IFI16	3428	interferon gamma inducible protein 16	2303.29	0.163807	0.156207	0.0307987	0.173774
	ZNF609	23060	zinc finger protein 609	274.367	-0.170751	0.110733	0.0307878	0.173774
	ZFP36L1	677	ZFP36 ring finger protein like 1	4075.33	0.170525	0.137187	0.030919	0.17424
	TSEN34	79042	tRNA splicing endonuclease subunit 34	949.532	0.168137	0.144359	0.0310641	0.174844
	STAG3L3	442578	stromal antigen 3-like 3 (pseudogene)	239.51	-0.168808	0.106807	0.0312597	0.175731
	NCKAP5L	57701	NCK associated protein 5 like	256.128	0.16941	0.108683	0.0313999	0.176091
	ELMO2	63916	engulfment and cell motility 2	280.929	0.163799	0.154277	0.0313965	0.176091
	MFSD5	84975	major facilitator superfamily domain containing 5	213.879	0.169133	0.108339	0.0315454	0.176334
	CD55	1604	CD55 molecule (Cromer blood group)	1327.51	0.154041	0.175257	0.0315577	0.176334
	NIPAL3	57185	NIPA like domain containing 3	237.311	-0.171559	0.118403	0.031544	0.176334
	MS4A4E	643680	membrane spanning 4-domains A4E	267.4	0.169429	0.109449	0.0316498	0.176422
	TREM1	54210	triggering receptor expressed on myeloid cells 1	2604.64	0.161258	0.159281	0.03164	0.176422
	IL13RA1	3597	interleukin 13 receptor subunit alpha 1	1624.79	0.165654	0.148714	0.0317243	0.176624
	SDHB	6390	succinate dehydrogenase complex iron sulfur subunit B	350.869	0.162974	0.0973883	0.0318181	0.176933
	MRPL44	65080	mitochondrial ribosomal protein L44	239.469	0.171007	0.118842	0.0321023	0.177294
	FAM120AOS	158293	family with sequence similarity 120A opposite strand	267.572	0.170803	0.118212	0.0322356	0.177294
	DNTTIP1	116092	deoxynucleotidyltransferase terminal interacting protein 1	388.252	0.17078	0.127465	0.0322549	0.177294
	HDLBP	3069	high density lipoprotein binding protein	1566.64	0.169119	0.137522	0.0320057	0.177294
	PXN	5829	paxillin	4518.96	0.168837	0.138578	0.0319924	0.177294
	LRRC4	64101	leucine rich repeat containing 4	512.072	0.16525	0.148019	0.0322481	0.177294
	ADRM1	11047	adhesion regulating molecule 1	538.149	0.164334	0.100118	0.0322667	0.177294
	STX11	8676	syntaxin 11	954.233	0.158165	0.164452	0.0321433	0.177294
	SRPK1	6732	SRSF protein kinase 1	1068.07	0.154903	0.17104	0.0322661	0.177294
	MS4A7	58475	membrane spanning 4-domains A7	507.24	-0.160136	0.160518	0.032036	0.177294
	RNF149	284996	ring finger protein 149	5152.86	0.159445	0.160833	0.0324236	0.177945
	SELENOT	51714	selenoprotein T	622.769	0.166678	0.14226	0.0328153	0.179348
	FBXO38	81545	F-box protein 38	488.701	0.166607	0.105461	0.0328733	0.179348
	STX3	6809	syntaxin 3	2031.36	0.164199	0.148967	0.0327737	0.179348
	NFE2L2	4780	nuclear factor, erythroid 2 like 2	793.284	0.163448	0.150853	0.0327496	0.179348
	IFNGR1	3459	interferon gamma receptor 1	1592.77	0.162776	0.152108	0.0328571	0.179348
	TP53	7157	tumor protein p53	379.324	-0.170243	0.120603	0.0329455	0.17953
	CROCCP2	84809	CROCC pseudogene 2	295.599	-0.167599	0.13876	0.0329888	0.179554
	KIAA2013	90231	KIAA2013	1107.87	0.170022	0.125475	0.033104	0.179969
	MFSD14A	64645	major facilitator superfamily domain containing 14A	499.374	0.169399	0.115705	0.0332597	0.180512
	STAT5A	6776	signal transducer and activator of transcription 5A	1379.75	0.168162	0.135409	0.0333074	0.180512
	OPTN	10133	optineurin	1376.71	0.140192	0.200259	0.0333211	0.180512
	ARF3	377	ADP ribosylation factor 3	1793.66	0.169615	0.120042	0.0335234	0.181016
	CMTM2	146225	CKLF like MARVEL transmembrane domain containing 2	476.535	0.152804	0.171662	0.0334831	0.181016
	CALM1	801	calmodulin 1	2528.41	-0.13709	0.073548	0.0335317	0.181016
	ST3GAL2	6483	ST3 beta-galactoside alpha-2,3-sialyltransferase 2	1371.36	0.159483	0.157357	0.033577	0.181049
	XK	7504	X-linked Kx blood group	232.496	0.113623	0.265059	0.0336289	0.181118
	IRAK4	51135	interleukin 1 receptor associated kinase 4	571.502	0.169435	0.124158	0.0337261	0.181147
	SIAH2	6478	siah E3 ubiquitin protein ligase 2	1147.91	0.140121	0.198967	0.0336875	0.181147
	NAAA	27163	N-acylethanolamine acid amidase	476.293	-0.167823	0.110991	0.0337519	0.181147
	LPAR2	9170	lysophosphatidic acid receptor 2	1151.17	0.167807	0.133828	0.0339691	0.182101
	RNF13	11342	ring finger protein 13	769.29	0.158418	0.158322	0.0340426	0.182236
	H2BC12			220.844	0.14616	0.183874	0.0340731	0.182236
	OSBPL2	9885	oxysterol binding protein like 2	1037.45	0.167499	0.133788	0.0342575	0.182378
	TMED9	54732	transmembrane p24 trafficking protein 9	568.471	0.152833	0.0877811	0.0342173	0.182378
	CARM1	10498	coactivator associated arginine methyltransferase 1	595.257	0.146256	0.183083	0.0342496	0.182378
	ELOF1	84337	elongation factor 1 homolog	499.845	0.144791	0.1863	0.0342387	0.182378
	MARCHF5			238.569	0.167019	0.135418	0.0343259	0.182532
	SLC25A28	81894	solute carrier family 25 member 28	254.408	0.168765	0.121834	0.0344141	0.182735
	HNRNPUL2-BSCL2	100534595	HNRNPUL2-BSCL2 readthrough (NMD candidate)	432.454	0.16767	0.11308	0.0344754	0.182735
	TLN1	7094	talin 1	506.8	0.161829	0.149545	0.0344827	0.182735
	GPS2	2874	G protein pathway suppressor 2	639.82	0.168166	0.116774	0.0346604	0.182806
	XIAP	331	X-linked inhibitor of apoptosis	552.491	0.1679	0.128483	0.0348195	0.182806
	IRF2	3660	interferon regulatory factor 2	1338.15	0.166186	0.135939	0.0349578	0.182806
	NSMAF	8439	neutral sphingomyelinase activation associated factor	410.97	0.165875	0.137737	0.0347705	0.182806
	TUT7	79670	terminal uridylyl transferase 7	1064.92	0.162563	0.146331	0.0349885	0.182806
	AL627309.6			1075.83	0.161148	0.149781	0.0349601	0.182806
	B2M	567	beta-2-microglobulin	32215.9	0.16038	0.152183	0.034721	0.182806
	ZNF467	168544	zinc finger protein 467	1266.43	0.157999	0.156621	0.0349879	0.182806
	CNIH4	29097	cornichon family AMPA receptor auxiliary protein 4	273.707	0.149131	0.175971	0.0345831	0.182806
	DNAJB2	3300	DnaJ heat shock protein family (Hsp40) member B2	950.236	0.143329	0.186972	0.0349929	0.182806
	DPM2	8818	dolichyl-phosphate mannosyltransferase subunit 2, regulatory	493.942	0.134423	0.209328	0.0345512	0.182806
	C2CD5	9847	C2 calcium dependent domain containing 5	257.223	-0.164877	0.105613	0.0347684	0.182806
	ZNF706	51123	zinc finger protein 706	222.299	-0.165588	0.107898	0.0350104	0.182806
	CCDC97	90324	coiled-coil domain containing 97	506.909	0.165244	0.107716	0.0353071	0.183939
	TPM1	7168	tropomyosin 1	218.61	0.147887	0.176433	0.0352913	0.183939
	NIT1	4817	nitrilase 1	219.729	0.161604	0.100322	0.035349	0.18395
	DEDD2	162989	death effector domain containing 2	1151.49	0.167166	0.128945	0.0354632	0.184337
	TMCC2	9911	transmembrane and coiled-coil domain family 2	575.088	0.115293	0.252967	0.0355216	0.184433
	CENATAC			234.389	-0.166675	0.113872	0.0357003	0.185153
	RGL2	5863	ral guanine nucleotide dissociation stimulator like 2	1297.06	0.167196	0.122819	0.0359828	0.186333
	MAN1A1	4121	mannosidase alpha class 1A member 1	685.313	0.163982	0.139259	0.0360573	0.186333
	TUBB4B	10383	tubulin beta 4B class IVb	721.198	0.163756	0.139814	0.0360932	0.186333
	DEFA1B	728358	defensin alpha 1B	2811.99	0.0968757	0.279941	0.0361295	0.186333
	PIK3R1	5295	phosphoinositide-3-kinase regulatory subunit 1	472.776	-0.154565	0.0914448	0.0360842	0.186333
	MIEN1	84299	migration and invasion enhancer 1	213.867	0.165186	0.109923	0.036202	0.186499
	MAPK3	5595	mitogen-activated protein kinase 3	820.924	0.164612	0.135966	0.0364218	0.187214
	TXN2	25828	thioredoxin 2	285.427	0.143077	0.0801846	0.0363925	0.187214
	RAB11A	8766	RAB11A, member RAS oncogene family	654.718	0.163485	0.106589	0.0367595	0.188739
	PICALM	8301	phosphatidylinositol binding clathrin assembly protein	3610.57	0.165254	0.131015	0.0369819	0.189671
	YBX1	4904	Y-box binding protein 1	4630.85	0.142341	0.182404	0.0371533	0.189934
	TEX261	113419	testis expressed 261	448.88	0.130592	0.0706346	0.0370778	0.189934
	RCC2	55920	regulator of chromosome condensation 2	569.888	-0.165232	0.113412	0.0371566	0.189934
	S100P	6286	S100 calcium binding protein P	343.964	0.120192	0.23324	0.0373598	0.190762
	KLHDC4	54758	kelch domain containing 4	212.542	-0.162645	0.13889	0.037428	0.190899
	CAMKK2	10645	calcium/calmodulin dependent protein kinase kinase 2	1524.13	0.163293	0.136288	0.0376026	0.191349
	ZNHIT1	10467	zinc finger HIT-type containing 1	325.543	0.155866	0.0946506	0.037603	0.191349
	MTMR14	64419	myotubularin related protein 14	906.044	0.150662	0.0884585	0.0376404	0.191349
	PGAP6			1184.23	0.161498	0.14127	0.0377157	0.191398
	ZNF200	7752	zinc finger protein 200	324.082	0.147914	0.169769	0.0377329	0.191398
	REPIN1	29803	replication initiator 1	518.355	-0.162825	0.107382	0.0378663	0.191864
	PSMD4	5710	proteasome 26S subunit, non-ATPase 4	985.741	0.161453	0.104283	0.0379357	0.192005
	NUCKS1	64710	nuclear casein kinase and cyclin dependent kinase substrate 1	510.602	-0.162479	0.137223	0.0381186	0.19272
	TMEM59	9528	transmembrane protein 59	1165.06	0.16342	0.133125	0.0383458	0.192988
	SPPL2A	84888	signal peptide peptidase like 2A	244.676	0.162207	0.137503	0.0382977	0.192988
	C1RL	51279	complement C1r subcomponent like	983.219	0.160237	0.142512	0.0384639	0.192988
	ABTB1	80325	ankyrin repeat and BTB domain containing 1	3620.19	0.159131	0.145349	0.038413	0.192988
	LACTB	114294	lactamase beta	295.221	0.154252	0.155862	0.0383865	0.192988
	ATP5F1E	514	ATP synthase F1 subunit epsilon	959.826	0.138979	0.185666	0.0384296	0.192988
	KLF4	9314	Kruppel like factor 4	246.502	-0.164671	0.126072	0.0383864	0.192988
	KATNIP			290.268	0.161648	0.138278	0.0385962	0.193442
	TSC22D4	81628	TSC22 domain family member 4	2088.38	0.163499	0.129609	0.0390672	0.195201
	SLC9A1	6548	solute carrier family 9 member A1	411.227	0.162916	0.132406	0.0390457	0.195201
	SLTM	79811	SAFB like transcription modulator	675.635	-0.146106	0.0849102	0.0391162	0.195201
	FTSJ3	117246	FtsJ RNA 2'-O-methyltransferase 3	272.528	-0.162939	0.132063	0.0391066	0.195201
	UBA52	7311	ubiquitin A-52 residue ribosomal protein fusion product 1	9100.94	0.145691	0.170424	0.0392153	0.195484
	SDCBP	6386	syndecan binding protein	6230.64	0.158208	0.144836	0.0394956	0.196669
	PPIF	10105	peptidylprolyl isomerase F	609.678	0.163339	0.127644	0.0395942	0.196948
	FOLR3	2352	folate receptor 3	373.994	0.119019	0.226376	0.0398263	0.197889
	IFITM3	10410	interferon induced transmembrane protein 3	7450.78	0.129368	0.20139	0.0400469	0.198772
	SAMD9L	219285	sterile alpha motif domain containing 9 like	1526.36	0.137047	0.184931	0.0401316	0.198979
	AC007326.4			380.934	0.163288	0.122704	0.0401809	0.19901
	MYD88	4615	MYD88 innate immune signal transduction adaptor	3165.71	0.161016	0.134749	0.0403768	0.199027
	TET2	54790	tet methylcytosine dioxygenase 2	872.669	0.158908	0.140969	0.0403587	0.199027
	FBXO7	25793	F-box protein 7	6163.56	0.127876	0.203655	0.0403857	0.199027
	IL7R	3575	interleukin 7 receptor	1861.57	-0.152097	0.155691	0.0403705	0.199027
	EFTUD2	9343	elongation factor Tu GTP binding domain containing 2	522.52	-0.160661	0.107316	0.0403997	0.199027
	VCPIP1	80124	valosin containing protein interacting protein 1	699.54	0.155342	0.148232	0.0407888	0.20073
	SNX18	112574	sorting nexin 18	716.651	0.160185	0.135552	0.0410002	0.201546
	MAP2K2	5605	mitogen-activated protein kinase kinase 2	1572.75	0.160161	0.135344	0.0410936	0.201546
	NRGN	4900	neurogranin	994.051	0.130501	0.195693	0.0411291	0.201546
	GOLGA8B	440270	golgin A8 family member B	383.055	-0.157242	0.1433	0.0410888	0.201546
	PDCD6	10016	programmed cell death 6	483.102	0.1356	0.0767592	0.041244	0.201894
	EXOC1	55763	exocyst complex component 1	307.785	0.162161	0.116926	0.0412974	0.201933
	SH3BGRL	6451	SH3 domain binding glutamate rich protein like	1444.36	0.16188	0.115152	0.0413715	0.201933
	RAB4B	53916	RAB4B, member RAS oncogene family	600.152	0.161072	0.111199	0.041384	0.201933
	GABARAPL2	11345	GABA type A receptor associated protein like 2	1141.31	0.139237	0.177348	0.0414703	0.201933
	BPGM	669	bisphosphoglycerate mutase	1350.68	0.101848	0.257554	0.0414276	0.201933
	PPIP5K2	23262	diphosphoinositol pentakisphosphate kinase 2	248.771	-0.161847	0.125663	0.0415485	0.202101
	ZNF512	84450	zinc finger protein 512	225.395	-0.161649	0.12686	0.041596	0.202119
	BAZ1A	11177	bromodomain adjacent to zinc finger domain 1A	1505.85	0.156763	0.142892	0.0417506	0.202657
	MAFG	4097	MAF bZIP transcription factor G	287.615	0.161287	0.114882	0.0420398	0.203745
	RCBTB2	1102	RCC1 and BTB domain containing protein 2	532.288	0.159561	0.10809	0.0421033	0.203745
	SERF2	10169	small EDRK-rich factor 2	3495.18	0.14356	0.167936	0.0421071	0.203745
	PF4	5196	platelet factor 4	487.884	0.13913	0.175824	0.0422253	0.204104
	RBMS1	5937	RNA binding motif single stranded interacting protein 1	1024.69	0.159795	0.13267	0.042331	0.204231
	DCAF10	79269	DDB1 and CUL4 associated factor 10	358.9	0.133682	0.185973	0.0423401	0.204231
	DOK1	1796	docking protein 1	510.024	0.161122	0.125304	0.0424329	0.204351
	LRCH4	4034	leucine rich repeats and calponin homology domain containing 4	1042.98	0.161091	0.125424	0.0424533	0.204351
	RNF130	55819	ring finger protein 130	2576.33	0.161263	0.119891	0.0425794	0.20457
	NOTCH1	4851	notch receptor 1	2092.87	0.16098	0.124279	0.0427227	0.20457
	TANK	10010	TRAF family member associated NFKB activator	466.58	0.157811	0.137751	0.0427644	0.20457
	UBXN2B	137886	UBX domain protein 2B	856.932	0.154988	0.144743	0.0427497	0.20457
	ZBTB44	29068	zinc finger and BTB domain containing 44	588.366	0.144121	0.165791	0.0426527	0.20457
	PSMD13	5719	proteasome 26S subunit, non-ATPase 13	701.026	0.137313	0.0790698	0.0427168	0.20457
	IL1RN	3557	interleukin 1 receptor antagonist	1105.56	0.147116	0.160022	0.0428256	0.204651
	USP38	84640	ubiquitin specific peptidase 38	249.652	0.160279	0.115915	0.0434542	0.2049
	RRP12	23223	ribosomal RNA processing 12 homolog	618.471	0.160115	0.127859	0.0431806	0.2049
	SLC12A6	9990	solute carrier family 12 member 6	2029.5	0.159772	0.128999	0.0433322	0.2049
	STAT3	6774	signal transducer and activator of transcription 3	3291.45	0.159597	0.129387	0.0434443	0.2049
	ACTN1	87	actinin alpha 1	352.455	0.158734	0.133	0.0434242	0.2049
	AFTPH	54812	aftiphilin	554.654	0.157366	0.10437	0.0430335	0.2049
	TCTA	6988	T cell leukemia translocation altered	248.094	0.154303	0.0988134	0.043215	0.2049
	NQO2	4835	N-ribosyldihydronicotinamide:quinone reductase 2	837.101	0.141252	0.170313	0.0429769	0.2049
	FAM117A	81558	family with sequence similarity 117 member A	1100.66	0.135909	0.17986	0.043112	0.2049
	RGS10	6001	regulator of G protein signaling 10	527.749	0.131507	0.187796	0.043342	0.2049
	GPX1	2876	glutathione peroxidase 1	5870.99	0.123975	0.204303	0.043029	0.2049
	EWSR1	2130	EWS RNA binding protein 1	1715.35	0.119611	0.0655378	0.0432705	0.2049
	PABPC4	8761	poly(A) binding protein cytoplasmic 4	809.2	-0.16076	0.12009	0.0431918	0.2049
	OST4	100128731	oligosaccharyltransferase complex subunit 4, non-catalytic	824.028	0.149566	0.153661	0.043778	0.206216
	UNC119	9094	unc-119 lipid binding chaperone	845.998	0.158605	0.109365	0.0438456	0.206324
	ARPC4	10093	actin related protein 2/3 complex subunit 4	3598.88	0.159428	0.113516	0.044073	0.207061
	C11orf21	29125	chromosome 11 open reading frame 21	831.292	-0.159866	0.116818	0.0440917	0.207061
	SF3B2	10992	splicing factor 3b subunit 2	249.317	0.15719	0.135926	0.0441555	0.20715
	DAPP1	27071	dual adaptor of phosphotyrosine and 3-phosphoinositides 1	845.521	0.145788	0.15973	0.0442309	0.207293
	SLC16A5	9121	solute carrier family 16 member 5	255.817	0.158548	0.11089	0.0444685	0.207359
	SLC6A6	6533	solute carrier family 6 member 6	4256.84	0.157734	0.133572	0.0443824	0.207359
	CAPNS1	826	calpain small subunit 1	1902.58	0.155559	0.102817	0.0444693	0.207359
	ACIN1	22985	apoptotic chromatin condensation inducer 1	1666	0.137608	0.0803363	0.0444231	0.207359
	CREB1	1385	cAMP responsive element binding protein 1	594.231	-0.149584	0.0931317	0.0443541	0.207359
	KDM2A	22992	lysine demethylase 2A	1663.75	0.153627	0.099346	0.0445647	0.207594
	TNFSF13B	10673	TNF superfamily member 13b	1272.21	0.13352	0.180957	0.0446347	0.207711
	OSER1	51526	oxidative stress responsive serine rich 1	516.63	0.159513	0.120785	0.0447273	0.207724
	GNA13	10672	G protein subunit alpha 13	1375.25	0.157772	0.132523	0.0446868	0.207724
	COMT	1312	catechol-O-methyltransferase	287.088	0.159438	0.119344	0.044813	0.207912
	PSTPIP1	9051	proline-serine-threonine phosphatase interacting protein 1	1256.3	0.159122	0.115747	0.0448938	0.208078
	BCL2L11	10018	BCL2 like 11	489.464	0.159155	0.121121	0.0451688	0.208547
	ERP44	23071	endoplasmic reticulum protein 44	696.872	0.158974	0.1164	0.0451755	0.208547
	CERS2	29956	ceramide synthase 2	1087.34	0.152081	0.0974074	0.0450603	0.208547
	EP400	57634	E1A binding protein p400	329.163	-0.157943	0.110594	0.0451614	0.208547
	LAMP1	3916	lysosomal associated membrane protein 1	1834.43	0.158933	0.123842	0.0452499	0.208682
	MNDA	4332	myeloid cell nuclear differentiation antigen	15823.7	0.152118	0.145651	0.0453466	0.208809
	WSB1	26118	WD repeat and SOCS box containing 1	1665.18	0.148118	0.153341	0.0454128	0.208809
	CHMP7	91782	charged multivesicular body protein 7	522.431	-0.157956	0.111387	0.0454056	0.208809
	TXNRD1	7296	thioredoxin reductase 1	733.573	0.15879	0.123367	0.0454797	0.208908
	USP32	84669	ubiquitin specific peptidase 32	1206.42	0.155111	0.13808	0.0456522	0.209456
	VTI1B	10490	vesicle transport through interaction with t-SNAREs 1B	858.941	0.131006	0.183368	0.0456897	0.209456
	JARID2	3720	jumonji and AT-rich interaction domain containing 2	695.885	-0.157853	0.112073	0.0457481	0.209516
	POLR1D	51082	RNA polymerase I and III subunit D	920.657	0.129949	0.18508	0.0458171	0.209624
	UBB	7314	ubiquitin B	24201.7	0.10941	0.228053	0.0459851	0.210185
	AGPAT1	10554	1-acylglycerol-3-phosphate O-acyltransferase 1	585.703	0.158467	0.119793	0.0460599	0.210319
	BAG6	7917	BCL2 associated athanogene 6	2716.61	0.150662	0.147155	0.0461332	0.210349
	BCL11B	64919	BAF chromatin remodeling complex subunit BCL11B	396.741	-0.150777	0.14688	0.0461575	0.210349
	FAM157B	100132403	family with sequence similarity 157 member B	872.746	0.141163	0.164004	0.0463527	0.21103
	NR1H2	7376	nuclear receptor subfamily 1 group H member 2	839.469	0.157926	0.117897	0.0466894	0.21173
	POGZ	23126	pogo transposable element derived with ZNF domain	448.551	-0.151734	0.0987049	0.0466896	0.21173
	DUSP6	1848	dual specificity phosphatase 6	1499.95	-0.156012	0.107752	0.0466182	0.21173
	KTN1	3895	kinectin 1	330.7	-0.157846	0.123933	0.0466097	0.21173
	FBXW4	6468	F-box and WD repeat domain containing 4	283.397	0.146261	0.154397	0.0467406	0.211753
	RELT	84957	RELT TNF receptor	934.758	0.157102	0.127631	0.0468826	0.211774
	SIPA1L1	26037	signal induced proliferation associated 1 like 1	1021.09	0.153964	0.138428	0.0468315	0.211774
	IFNAR1	3454	interferon alpha and beta receptor subunit 1	1348.58	0.147252	0.152402	0.0468538	0.211774
	BIN2	51411	bridging integrator 2	3672.7	0.15564	0.107634	0.0470765	0.211821
	CCR2	729230	C-C motif chemokine receptor 2	787.246	0.154287	0.13731	0.0469552	0.211821
	NCF2	4688	neutrophil cytosolic factor 2	9836.88	0.152746	0.140902	0.0470678	0.211821
	ANKH	56172	ANKH inorganic pyrophosphate transport regulator	574.668	0.125316	0.19136	0.046996	0.211821
	SIGLEC5	8778	sialic acid binding Ig like lectin 5	1034.5	0.135942	0.171547	0.0471739	0.212053
	S1PR4	8698	sphingosine-1-phosphate receptor 4	2320.79	0.151024	0.144008	0.0474373	0.21303
	STK35	140901	serine/threonine kinase 35	421.202	0.151755	0.0998227	0.0475938	0.213525
	PREX1	57580	phosphatidylinositol-3,4,5-trisphosphate dependent Rac exchange factor 1	6221.57	0.153601	0.137578	0.0476545	0.21359
	RAP2B	5912	RAP2B, member of RAS oncogene family	558.914	-0.130488	0.0758672	0.0477251	0.213699
	AK1	203	adenylate kinase 1	289.803	0.113504	0.213836	0.0478244	0.213937
	FAR2	55711	fatty acyl-CoA reductase 2	258.795	0.149603	0.146122	0.0478879	0.214013
	PSEN1	5663	presenilin 1	758.081	0.156531	0.125009	0.048148	0.21455
	LAMP2	3920	lysosomal associated membrane protein 2	2438.41	0.156504	0.124338	0.0482914	0.21455
	CD37	951	CD37 molecule	4402.74	0.155076	0.108371	0.0482018	0.21455
	BNIP2	663	BCL2 interacting protein 2	996.56	0.155006	0.132392	0.0480822	0.21455
	IGSF6	10261	immunoglobulin superfamily member 6	2524.5	0.148687	0.147301	0.0482511	0.21455
	SLC22A18	5002	solute carrier family 22 member 18	283.826	0.142992	0.157492	0.0483329	0.21455
	TSPYL1	7259	TSPY like 1	486.164	-0.140793	0.0858377	0.0482065	0.21455
	HECTD4	283450	HECT domain E3 ubiquitin protein ligase 4	361.955	-0.147126	0.149861	0.0484944	0.214896
	KLHL36	79786	kelch like family member 36	463.777	-0.153223	0.104013	0.048504	0.214896
	SS18	6760	SS18 subunit of BAF chromatin remodeling complex	245.131	-0.138957	0.084274	0.0487466	0.215764
	GIMAP4	55303	GTPase, IMAP family member 4	2946.71	0.155928	0.114054	0.0488604	0.216061
	RSBN1	54665	round spermatid basic protein 1	284.223	0.154227	0.132617	0.0489809	0.216387
	ERCC3	2071	ERCC excision repair 3, TFIIH core complex helicase subunit	254.141	-0.139266	0.0848031	0.0490781	0.216609
	RAB10	10890	RAB10, member RAS oncogene family	1276.01	0.155824	0.123831	0.0492688	0.21719
	ATP6AP1	537	ATPase H+ transporting accessory protein 1	1116.14	0.151601	0.101834	0.0493824	0.21719
	TFEB	7942	transcription factor EB	789.194	0.15017	0.142333	0.0493578	0.21719
	IRAK3	11213	interleukin 1 receptor associated kinase 3	1266.46	0.135414	0.168373	0.0495096	0.21719
	PRDX6	9588	peroxiredoxin 6	2092.64	0.117812	0.200409	0.0495794	0.21719
	GPR146	115330	G protein-coupled receptor 146	349.745	0.113667	0.209357	0.0494317	0.21719
	SFPQ	6421	splicing factor proline and glutamine rich	1635.48	-0.131342	0.0775397	0.0495856	0.21719
	IPO5	3843	importin 5	219.921	-0.155208	0.126817	0.0495203	0.21719
	UBALD2	283991	UBA like domain containing 2	1999.96	0.149446	0.143148	0.0497683	0.217783
	NUMB	8650	NUMB endocytic adaptor protein	2474.01	0.153569	0.132276	0.0499571	0.218279
	CFL1	1072	cofilin 1	1496.81	0.152804	0.134508	0.0500232	0.218279
	CCR7	1236	C-C motif chemokine receptor 7	700.421	-0.14249	0.15569	0.0500101	0.218279
	SRRM2	23524	serine/arginine repetitive matrix 2	1383.71	0.154399	0.11097	0.0501852	0.218573
	UBP1	7342	upstream binding protein 1	418.89	-0.147804	0.0961648	0.0501679	0.218573
	CARD19	84270	caspase recruitment domain family member 19	340.257	0.154831	0.12514	0.0503883	0.219251
	POU2F2	5452	POU class 2 homeobox 2	1027.72	-0.154228	0.128289	0.05044	0.219269
	GRN	2896	granulin precursor	6429.79	0.153974	0.129023	0.0505596	0.219583
	RERE	473	arginine-glutamic acid dipeptide repeats	1929.66	0.151953	0.135432	0.0507008	0.219989
	PDE7A	5150	phosphodiesterase 7A	689.716	-0.15254	0.106113	0.0507523	0.220006
	TMEM115	11070	transmembrane protein 115	253.725	0.152474	0.1063	0.050954	0.22026
	NOP10	55505	NOP10 ribonucleoprotein	334.332	0.146153	0.147777	0.050908	0.22026
	USP10	9100	ubiquitin specific peptidase 10	973.159	0.13939	0.159505	0.050933	0.22026
	MAPK1	5594	mitogen-activated protein kinase 1	397.389	0.151165	0.136834	0.0510392	0.220291
	ESYT1	23344	extended synaptotagmin 1	934.992	-0.150402	0.138693	0.0510564	0.220291
	CHMP4B	128866	charged multivesicular body protein 4B	1310.21	0.153769	0.111685	0.0513323	0.221275
	RAB7A	7879	RAB7A, member RAS oncogene family	3052.38	0.153456	0.128022	0.0515606	0.221639
	TMBIM4	51643	transmembrane BAX inhibitor motif containing 4	754.904	0.153439	0.128319	0.0514968	0.221639
	COX5B	1329	cytochrome c oxidase subunit 5B	453.124	0.153012	0.109182	0.0515409	0.221639
	PML	5371	promyelocytic leukemia	752.498	0.133485	0.168159	0.0516323	0.22174
	KAT6A	7994	lysine acetyltransferase 6A	958.896	0.153172	0.110318	0.0517507	0.221998
	MTRNR2L12	100463498	MT-RNR2 like 12	16067.5	0.149347	0.139803	0.0517941	0.221998
	NDUFA11	126328	NADH:ubiquinone oxidoreductase subunit A11	369.526	0.140208	0.0876448	0.0518364	0.221998
	SLC7A5	8140	solute carrier family 7 member 5	237.621	0.12055	0.189676	0.0521533	0.223149
	TBC1D1	23216	TBC1 domain family member 1	921.36	0.152837	0.127703	0.0525079	0.224458
	RAB31	11031	RAB31, member RAS oncogene family	1854.12	0.146469	0.144553	0.0525785	0.224552
	ALDOA	226	aldolase, fructose-bisphosphate A	7093.11	0.153048	0.112852	0.0527332	0.22459
	CIC	23152	capicua transcriptional repressor	1026.1	0.151323	0.132903	0.0526763	0.22459
	SYNE3	161176	spectrin repeat containing nuclear envelope family member 3	500.05	-0.151069	0.105603	0.052688	0.22459
	MARS1			504.275	0.153172	0.116715	0.0532353	0.224772
	TM9SF1	10548	transmembrane 9 superfamily member 1	288.692	0.153122	0.123855	0.0530067	0.224772
	IP6K1	9807	inositol hexakisphosphate kinase 1	883.605	0.153081	0.11537	0.0532025	0.224772
	TAPBP	6892	TAP binding protein	4318.7	0.150673	0.133936	0.0530905	0.224772
	GMFG	9535	glia maturation factor gamma	1245.67	0.148282	0.139229	0.0535056	0.224772
	SLAMF7	57823	SLAM family member 7	480.027	0.147217	0.14161	0.053473	0.224772
	CPD	1362	carboxypeptidase D	1506.62	0.14623	0.144343	0.0530132	0.224772
	ZDHHC20	253832	zinc finger DHHC-type containing 20	688.997	0.142303	0.151616	0.0529569	0.224772
	GPR27	2850	G protein-coupled receptor 27	393.058	0.140985	0.153545	0.0531841	0.224772
	PTGS1	5742	prostaglandin-endoperoxide synthase 1	604.688	0.135258	0.163372	0.052887	0.224772
	APOL2	23780	apolipoprotein L2	367.543	0.120611	0.187254	0.0533873	0.224772
	GATA1	2623	GATA binding protein 1	305.513	0.117871	0.192182	0.0534506	0.224772
	ARHGEF6	9459	Rac/Cdc42 guanine nucleotide exchange factor 6	932.531	-0.129458	0.0777089	0.0532939	0.224772
	DDX18	8886	DEAD-box helicase 18	360.967	-0.150876	0.105681	0.0530303	0.224772
	POLR2J3	548644	RNA polymerase II subunit J3	826.592	-0.152682	0.125184	0.0533745	0.224772
	CHCHD2	51142	coiled-coil-helix-coiled-coil-helix domain containing 2	647.94	0.150545	0.106002	0.0537304	0.225307
	HADHA	3030	hydroxyacyl-CoA dehydrogenase trifunctional multienzyme complex subunit alpha	1268.07	0.120358	0.070249	0.0537099	0.225307
	MS4A6A	64231	membrane spanning 4-domains A6A	913.117	0.144308	0.146546	0.0539858	0.225968
	SUPT16H	11198	SPT16 homolog, facilitates chromatin remodeling subunit	545.021	-0.129279	0.077878	0.0539714	0.225968
	POLR2J	5439	RNA polymerase II subunit J	267.199	0.151344	0.129392	0.0540519	0.22604
	CD2BP2	10421	CD2 cytoplasmic tail binding protein 2	769.416	0.149815	0.134168	0.054153	0.226258
	WDR37	22884	WD repeat domain 37	400.125	0.13667	0.0853065	0.0542776	0.226573
	MTF1	4520	metal regulatory transcription factor 1	487.567	0.150658	0.130878	0.0544518	0.227095
	HNRNPC	3183	heterogeneous nuclear ribonucleoprotein C (C1/C2)	2617.09	0.146487	0.0984608	0.0545147	0.227153
	SIPA1	6494	signal-induced proliferation-associated 1	2669.11	0.152202	0.116744	0.0546911	0.227478
	CSK	1445	C-terminal Src kinase	1620.73	0.150586	0.130564	0.05468	0.227478
	GMIP	51291	GEM interacting protein	3009	0.150965	0.128024	0.0550646	0.228756
	VAT1	10493	vesicle amine transport 1	262.675	0.150365	0.10806	0.0550974	0.228756
	C14orf119	55017	chromosome 14 open reading frame 119	294.775	0.149756	0.106616	0.0553212	0.229273
	GOLGA3	2802	golgin A3	414.914	-0.147234	0.100677	0.0552738	0.229273
	IER2	9592	immediate early response 2	1763.29	0.149378	0.132881	0.0553827	0.229278
	CSE1L	1434	chromosome segregation 1 like	217.793	-0.147011	0.100463	0.0554584	0.229278
	TRPM7	54822	transient receptor potential cation channel subfamily M member 7	258.597	-0.147788	0.136974	0.0554712	0.229278
	FLII	2314	FLII actin remodeling protein	2098.96	0.151564	0.119726	0.0557451	0.229475
	TMEM127	55654	transmembrane protein 127	1960.25	0.151235	0.119132	0.0562637	0.229475
	PIK3CD	5293	phosphatidylinositol-4,5-bisphosphate 3-kinase catalytic subunit delta	4504.36	0.151115	0.122017	0.0562423	0.229475
	PRELID1	27166	PRELI domain containing 1	1243.16	0.150738	0.125048	0.0562505	0.229475
	SP1	6667	Sp1 transcription factor	1734.67	0.150382	0.109281	0.0556236	0.229475
	PAPOLG	64895	poly(A) polymerase gamma	240.116	0.149356	0.132546	0.0555707	0.229475
	ADAM8	101	ADAM metallopeptidase domain 8	4936.65	0.147408	0.136868	0.0560617	0.229475
	TMEM179B	374395	transmembrane protein 179B	278.794	0.146022	0.0990516	0.0558365	0.229475
	UBE2L3	7332	ubiquitin conjugating enzyme E2 L3	644.497	0.139811	0.0901283	0.0560792	0.229475
	ANPEP	290	alanyl aminopeptidase, membrane	3355.96	0.139207	0.152847	0.0558633	0.229475
	PARP9	83666	poly(ADP-ribose) polymerase family member 9	2077.78	0.133628	0.16131	0.0562438	0.229475
	VHL	7428	von Hippel-Lindau tumor suppressor	575.175	-0.137032	0.0869321	0.056247	0.229475
	PIK3IP1	113791	phosphoinositide-3-kinase interacting protein 1	706.546	-0.142749	0.146355	0.0561338	0.229475
	KIAA0319L	79932	KIAA0319 like	1055.06	-0.148504	0.134736	0.0556952	0.229475
	HSH2D	84941	hematopoietic SH2 domain containing	1547.25	-0.150951	0.124836	0.0559813	0.229475
	CDA	978	cytidine deaminase	1251.15	0.140766	0.149578	0.0563438	0.229599
	TTC3	7267	tetratricopeptide repeat domain 3	427.81	-0.150776	0.123665	0.0564914	0.229997
	KDM6B	23135	lysine demethylase 6B	3277.25	0.147504	0.13557	0.056661	0.230282
	SLC40A1	30061	solute carrier family 40 member 1	1045.17	0.13995	0.150615	0.0566128	0.230282
	TMEM123	114908	transmembrane protein 123	1822.9	-0.150742	0.11651	0.0569237	0.231146
	KLHL12	59349	kelch like family member 12	296.441	0.149066	0.107913	0.0571131	0.231591
	CIR1	9541	corepressor interacting with RBPJ, 1	658.536	0.147166	0.135589	0.0571334	0.231591
	KDM2B	84678	lysine demethylase 2B	260.69	-0.147786	0.133825	0.0571963	0.231642
	GHITM	27069	growth hormone inducible transmembrane protein	1356.84	0.150408	0.121142	0.0574277	0.232304
	DECR1	1666	2,4-dienoyl-CoA reductase 1	601.834	0.139008	0.0900993	0.0574603	0.232304
	SPARC	6678	secreted protein acidic and cysteine rich	1200.2	0.118663	0.18342	0.0576913	0.232425
	TMEM86B	255043	transmembrane protein 86B	260.291	0.118031	0.184732	0.0575487	0.232425
	TENT5C	54855	terminal nucleotidyltransferase 5C	1537.22	0.0975246	0.223998	0.0576114	0.232425
	FAM193A	8603	family with sequence similarity 193 member A	295.269	-0.147977	0.105629	0.0576465	0.232425
	RAB11FIP4	84440	RAB11 family interacting protein 4	991.974	0.149349	0.126753	0.0578754	0.232712
	C2orf68	388969	chromosome 2 open reading frame 68	725.709	0.148622	0.108006	0.0578865	0.232712
	BACH1	571	BTB domain and CNC homolog 1	1843.56	0.146051	0.136993	0.0579137	0.232712
	EVI2B	2124	ecotropic viral integration site 2B	6426.86	0.149535	0.125475	0.0579646	0.232714
	WBP2	23558	WW domain binding protein 2	3315.25	0.143864	0.141315	0.0582046	0.232869
	ZNF185	7739	zinc finger protein 185 with LIM domain	304.497	0.136884	0.153655	0.0581909	0.232869
	RTN4	57142	reticulon 4	254.17	0.119786	0.18077	0.0581774	0.232869
	ZBTB1	22890	zinc finger and BTB domain containing 1	227.039	-0.146196	0.102116	0.0581814	0.232869
	PCBP1	5093	poly(rC) binding protein 1	4567.17	0.147592	0.106553	0.0588329	0.23457
	LYN	4067	LYN proto-oncogene, Src family tyrosine kinase	6583.98	0.140273	0.147218	0.0588067	0.23457
	GP1BB	2812	glycoprotein Ib platelet subunit beta	790.877	0.116397	0.185764	0.0586837	0.23457
	MYC	4609	MYC proto-oncogene, bHLH transcription factor	282.248	-0.149336	0.123465	0.0587486	0.23457
	HSD17B11	51170	hydroxysteroid 17-beta dehydrogenase 11	1701.37	0.149137	0.123246	0.0591049	0.235249
	MLX	6945	MAX dimerization protein MLX	594.075	0.141308	0.0944684	0.0590908	0.235249
	SUPT4H1	6827	SPT4 homolog, DSIF elongation factor subunit	687.465	0.149308	0.120901	0.0591823	0.235354
	FAM102A	399665	family with sequence similarity 102 member A	691.676	-0.131098	0.161346	0.0593055	0.235641
	PLAGL1	5325	PLAG1 like zinc finger 1	249.665	0.131307	0.160801	0.0594884	0.236165
	ZNF101	94039	zinc finger protein 101	341.149	-0.14902	0.115578	0.0595825	0.236335
	SNX20	124460	sorting nexin 20	1194.82	0.148986	0.120395	0.0597456	0.236779
	IL6R	3570	interleukin 6 receptor	4540.83	0.148562	0.12322	0.0600223	0.237672
	UQCR11	10975	ubiquinol-cytochrome c reductase, complex III subunit XI	371.138	0.129815	0.162234	0.0601892	0.2381
	BRD1	23774	bromodomain containing 1	301.528	-0.144132	0.100318	0.0602334	0.2381
	TRIP12	9320	thyroid hormone receptor interactor 12	1545.62	0.14698	0.10734	0.0603041	0.238175
	FTH1	2495	ferritin heavy chain 1	19641.7	0.137528	0.149894	0.0604091	0.238183
	TSPAN32	10077	tetraspanin 32	359.811	-0.147375	0.12832	0.0603712	0.238183
	NADK	65220	NAD kinase	5372.24	0.148056	0.124023	0.0606575	0.238959
	CKLF	51192	chemokine like factor	387.968	0.133463	0.155969	0.060755	0.239139
	FUNDC2	65991	FUN14 domain containing 2	301.464	0.116093	0.18295	0.0608888	0.239398
	RPS26	6231	ribosomal protein S26	832.81	-0.119338	0.177567	0.0609245	0.239398
	MDM4	4194	MDM4 regulator of p53	1019.55	-0.142407	0.098417	0.0614975	0.241444
	IKZF3	22806	IKAROS family zinc finger 3	760.211	-0.146738	0.126342	0.0621164	0.243667
	RGS14	10636	regulator of G protein signaling 14	1628.02	0.147134	0.122901	0.0624116	0.24441
	MAF1	84232	MAF1 homolog, negative regulator of RNA polymerase III	225.822	0.10735	0.195982	0.0623866	0.24441
	ACSS2	55902	acyl-CoA synthetase short chain family member 2	334.356	0.147313	0.117379	0.062586	0.244886
	CCNL1	57018	cyclin L1	1089.56	0.146792	0.123127	0.0629314	0.244992
	TXNL1	9352	thioredoxin like 1	273.443	0.145975	0.108995	0.0628687	0.244992
	ZNF316	100131017	zinc finger protein 316	780.029	0.145116	0.130997	0.0627375	0.244992
	YWHAH	7533	tyrosine 3-monooxygenase/tryptophan 5-monooxygenase activation protein eta	598.107	0.141068	0.0972624	0.0627345	0.244992
	MXD1	4084	MAX dimerization protein 1	7886.57	0.139907	0.142844	0.0628021	0.244992
	APOBEC3A	200315	apolipoprotein B mRNA editing enzyme catalytic subunit 3A	2582.97	0.135638	0.150069	0.0629077	0.244992
	TRIM22	10346	tripartite motif containing 22	3600.39	0.119632	0.174396	0.0629868	0.245002
	GLRX	2745	glutaredoxin	419.908	0.134555	0.151404	0.0632619	0.245865
	CHMP1A	5119	charged multivesicular body protein 1A	974.711	0.146658	0.11941	0.0636808	0.246224
	ATP6V1B2	526	ATPase H+ transporting V1 subunit B2	5143.68	0.145711	0.126259	0.0638339	0.246224
	ETV6	2120	ETS variant 6	754.881	0.144145	0.131959	0.0637855	0.246224
	CCDC69	26112	coiled-coil domain containing 69	1339.63	0.143849	0.103757	0.0635585	0.246224
	AKIRIN2	55122	akirin 2	797.179	0.143588	0.133618	0.0637157	0.246224
	ZNF516	9658	zinc finger protein 516	880.751	0.143246	0.134698	0.0635904	0.246224
	PIK3R5	23533	phosphoinositide-3-kinase regulatory subunit 5	2143.73	0.142373	0.100538	0.063604	0.246224
	TMEM140	55281	transmembrane protein 140	1396.58	0.12497	0.165437	0.0636879	0.246224
	IFI35	3430	interferon induced protein 35	587.401	0.121451	0.170571	0.0638244	0.246224
	PPP1R15A	23645	protein phosphatase 1 regulatory subunit 15A	1089.21	0.141655	0.13777	0.0640117	0.246704
	DNM2	1785	dynamin 2	2030.63	0.145534	0.11048	0.0642704	0.247083
	AP5Z1	9907	adaptor related protein complex 5 subunit zeta 1	564.036	0.142432	0.101381	0.0642474	0.247083
	CD74	972	CD74 molecule	4821.95	-0.133371	0.152155	0.0642706	0.247083
	KLF16	83855	Kruppel like factor 16	390.482	0.145273	0.126565	0.0644541	0.247583
	AKAP9	10142	A-kinase anchoring protein 9	397.664	-0.142937	0.13401	0.0645204	0.247632
	BNIP3L	665	BCL2 interacting protein 3 like	3679.8	0.106414	0.194154	0.0646445	0.247902
	MLLT1	4298	MLLT1 super elongation complex subunit	805.353	0.134707	0.14957	0.064704	0.247925
	ZNF746	155061	zinc finger protein 746	772.825	0.143307	0.13206	0.0650959	0.248028
	USF2	7392	upstream transcription factor 2, c-fos interacting	1167.83	0.141746	0.100771	0.0649814	0.248028
	ARCN1	372	archain 1	906.546	0.13891	0.0955741	0.0648649	0.248028
	POLL	27343	DNA polymerase lambda	503.526	0.122265	0.168089	0.0649044	0.248028
	ANKRD12	23253	ankyrin repeat domain 12	1166.46	-0.14162	0.136569	0.0649273	0.248028
	TOB2	10766	transducer of ERBB2, 2	294.585	-0.143959	0.106204	0.0650057	0.248028
	MED14	9282	mediator complex subunit 14	235.699	-0.145668	0.1143	0.0651066	0.248028
	LAMTOR5	10542	late endosomal/lysosomal adaptor, MAPK and MTOR activator 5	304.376	0.144213	0.129017	0.0651932	0.248153
	ATG9A	79065	autophagy related 9A	549.42	0.145257	0.123635	0.0654082	0.248562
	TOR1A	1861	torsin family 1 member A	372.072	0.142496	0.102877	0.0653749	0.248562
	MAP1S	55201	microtubule associated protein 1S	383.181	0.144974	0.112688	0.0659903	0.249755
	RIC8A	60626	RIC8 guanine nucleotide exchange factor A	630.447	0.140849	0.0999904	0.0659442	0.249755
	ME2	4200	malic enzyme 2	537.241	0.138559	0.0959951	0.0660464	0.249755
	RALGAPA2	57186	Ral GTPase activating protein catalytic alpha subunit 2	397.112	0.134884	0.147853	0.0660213	0.249755
	BMP2K	55589	BMP2 inducible kinase	572.708	0.125472	0.162347	0.0658149	0.249755
	MTSS1	9788	MTSS I-BAR domain containing 1	365.286	-0.13685	0.144661	0.0659128	0.249755
	LRRC25	126364	leucine rich repeat containing 25	2627.64	0.139577	0.139337	0.0661186	0.249824
	LRRFIP2	9209	LRR binding FLII interacting protein 2	374.946	0.144817	0.123092	0.0663062	0.250158
	MTCH1	23787	mitochondrial carrier 1	990.923	0.129772	0.084611	0.0663155	0.250158
	SPTBN1	6711	spectrin beta, non-erythrocytic 1	429.375	-0.144064	0.126779	0.0664234	0.250361
	LILRA2	11027	leukocyte immunoglobulin like receptor A2	2308.93	0.140592	0.136637	0.0665422	0.250604
	TPR	7175	translocated promoter region, nuclear basket protein	987.403	-0.145004	0.117853	0.06662	0.250693
	USP3	9960	ubiquitin specific peptidase 3	1063.61	0.144307	0.111278	0.0667789	0.251087
	MAP3K8	1326	mitogen-activated protein kinase kinase kinase 8	247.523	0.139704	0.137847	0.0670819	0.251612
	FAM214B	80256	family with sequence similarity 214 member B	933.72	0.137946	0.141447	0.066992	0.251612
	SLC8A1	6546	solute carrier family 8 member A1	265.864	0.131155	0.15265	0.0670399	0.251612
	RIOK3	8780	RIO kinase 3	1433.01	0.105994	0.191013	0.0673252	0.252319
	FOXJ3	22887	forkhead box J3	346.257	-0.125476	0.0806911	0.0675904	0.253108
	TAP2	6891	transporter 2, ATP binding cassette subfamily B member	1963.12	0.128588	0.155842	0.0676852	0.25325
	SESN3	143686	sestrin 3	1501.86	0.101863	0.197737	0.0677379	0.25325
	CYP1B1	1545	cytochrome P450 family 1 subfamily B member 1	307.674	0.125547	0.159942	0.0680307	0.253729
	TRABD2A	129293	TraB domain containing 2A	239.041	-0.13039	0.152808	0.0680292	0.253729
	SLC38A1	81539	solute carrier family 38 member 1	751.407	-0.141297	0.132839	0.0679877	0.253729
	DHRS7	51635	dehydrogenase/reductase 7	1103.04	0.142986	0.127139	0.0681467	0.253956
	UBE2D2	7322	ubiquitin conjugating enzyme E2 D2	761.646	0.128112	0.0838084	0.0682939	0.2543
	TTC37	9652	tetratricopeptide repeat domain 37	245.206	-0.141597	0.131249	0.0684542	0.254692
	PEF1	553115	penta-EF-hand domain containing 1	347.235	0.13603	0.0940823	0.0686523	0.25483
	FCGR2B	2213	Fc fragment of IgG receptor IIb	479.208	0.134989	0.144873	0.0686472	0.25483
	NFIL3	4783	nuclear factor, interleukin 3 regulated	713.687	0.130178	0.152504	0.068657	0.25483
	RNASEH2B	79621	ribonuclease H2 subunit B	241.346	-0.143675	0.115394	0.0688951	0.255509
	DDX49	54555	DEAD-box helicase 49	234.39	0.143296	0.112439	0.0690173	0.255757
	ATF4	468	activating transcription factor 4	924.784	0.136611	0.0953963	0.069179	0.256151
	COLGALT1	79709	collagen beta(1-O)galactosyltransferase 1	963.135	0.143208	0.115096	0.0697283	0.256282
	PTPRE	5791	protein tyrosine phosphatase receptor type E	1893.01	0.143078	0.120309	0.0699588	0.256282
	HSBP1	3281	heat shock factor binding protein 1	340.773	0.143052	0.121547	0.0698037	0.256282
	PISD	23761	phosphatidylserine decarboxylase	1364.52	0.142982	0.118506	0.0703014	0.256282
	TMUB1	83590	transmembrane and ubiquitin like domain containing 1	250.428	0.142131	0.110095	0.0704345	0.256282
	CHST15	51363	carbohydrate sulfotransferase 15	2520.75	0.141718	0.1293	0.0693395	0.256282
	UIMC1	51720	ubiquitin interaction motif containing 1	437.495	0.141641	0.106933	0.0698101	0.256282
	LAIR1	3903	leukocyte associated immunoglobulin like receptor 1	713.919	0.141046	0.105194	0.0698619	0.256282
	WASF2	10163	WASP family member 2	3097.7	0.139978	0.132595	0.0704324	0.256282
	BAK1	578	BCL2 antagonist/killer 1	406.013	0.139163	0.135182	0.0700239	0.256282
	CDC37	11140	cell division cycle 37	1085.67	0.137595	0.0974275	0.0696283	0.256282
	SORL1	6653	sortilin related receptor 1	469.485	0.135065	0.14332	0.0699885	0.256282
	AMZ2	51321	archaelysin family metallopeptidase 2	275.292	0.132992	0.0907646	0.0701412	0.256282
	MANSC1	54682	MANSC domain containing 1	580.374	0.130883	0.149855	0.0702633	0.256282
	PGRMC1	10857	progesterone receptor membrane component 1	326.527	0.130416	0.151413	0.0693986	0.256282
	SLC11A1	6556	solute carrier family 11 member 1	4358.88	0.128717	0.153138	0.07025	0.256282
	SHARPIN	81858	SHANK associated RH domain interactor	700.51	0.121058	0.164816	0.0696246	0.256282
	FBXO9	26268	F-box protein 9	649.853	0.113735	0.175104	0.0700708	0.256282
	GOLGA8A	23015	golgin A8 family member A	370.259	-0.129916	0.151837	0.0697393	0.256282
	FCF1	51077	FCF1 rRNA-processing protein	218.876	-0.139292	0.101434	0.070329	0.256282
	EHMT1	79813	euchromatic histone lysine methyltransferase 1	461.177	-0.141907	0.127258	0.0700099	0.256282
	MIS18BP1	55320	MIS18 binding protein 1	265.457	-0.143179	0.116162	0.0698965	0.256282
	CYBB	1536	cytochrome b-245 beta chain	4906.53	0.138514	0.13591	0.070593	0.256656
	CAPZA1	829	capping actin protein of muscle Z-line subunit alpha 1	2864.97	0.137323	0.138135	0.0708442	0.257195
	LRFN1	57622	leucine rich repeat and fibronectin type III domain containing 1	295.101	0.135522	0.141581	0.0708525	0.257195
	PHACTR4	65979	phosphatase and actin regulator 4	218.765	-0.142465	0.114779	0.0710913	0.257859
	MGAT4A	11320	alpha-1,3-mannosyl-glycoprotein 4-beta-N-acetylglucosaminyltransferase A	481.176	-0.140203	0.10478	0.071232	0.258167
	MAP11	55262	microtubule associated protein 11	783.015	0.142235	0.114958	0.0715583	0.258439
	LEMD2	221496	LEM domain containing 2	215.563	0.141879	0.111852	0.071552	0.258439
	TPM4	7171	tropomyosin 4	1786.13	0.141825	0.111628	0.0715868	0.258439
	ASCC2	84164	activating signal cointegrator 1 complex subunit 2	2466.97	0.107937	0.182423	0.0715423	0.258439
	TNFAIP8	25816	TNF alpha induced protein 8	629.996	-0.138782	0.101675	0.0715713	0.258439
	ATXN7L3	56970	ataxin 7 like 3	1003.93	0.140404	0.129083	0.071812	0.25905
	WDTC1	23038	WD and tetratricopeptide repeats 1	1548.2	0.140397	0.12843	0.0721762	0.259518
	PSMD9	5715	proteasome 26S subunit, non-ATPase 9	270.568	0.137147	0.136875	0.072206	0.259518
	TMEM91	641649	transmembrane protein 91	498.222	0.12602	0.155321	0.0721289	0.259518
	EZR	7430	ezrin	859.269	-0.141904	0.114729	0.0721623	0.259518
	SH3BP1	23616	SH3 domain binding protein 1	1032.66	-0.141972	0.118218	0.0722224	0.259518
	RNF145	153830	ring finger protein 145	832.525	0.136759	0.0983634	0.0723879	0.259708
	NCL	4691	nucleolin	1554.55	-0.141872	0.119129	0.0723552	0.259708
	PXK	54899	PX domain containing serine/threonine kinase like	383.004	0.140828	0.126016	0.0725305	0.259982
	IGF2BP2	10644	insulin like growth factor 2 mRNA binding protein 2	512.268	0.0981432	0.197626	0.0725767	0.259982
	CTDSP1	58190	CTD small phosphatase 1	2164.65	0.140668	0.126146	0.0727726	0.260482
	EPM2AIP1	9852	EPM2A interacting protein 1	232.888	-0.1399	0.10626	0.0728389	0.260518
	COX6A1	1337	cytochrome c oxidase subunit 6A1	343.431	0.141484	0.11479	0.0729885	0.26066
	CALCOCO2	10241	calcium binding and coiled-coil domain 2	1091.27	0.141358	0.114318	0.0731607	0.26066
	KPNB1	3837	karyopherin subunit beta 1	3300.04	0.140018	0.128021	0.0730899	0.26066
	OPRL1	4987	opioid related nociceptin receptor 1	223.085	0.13964	0.129259	0.0731155	0.26066
	ENTPD1	953	ectonucleoside triphosphate diphosphohydrolase 1	1476.76	0.135083	0.140036	0.0730398	0.26066
	IQSEC1	9922	IQ motif and Sec7 domain 1	2919.66	0.141174	0.121143	0.0734052	0.260927
	C1orf162	128346	chromosome 1 open reading frame 162	794.709	0.140425	0.125779	0.0733859	0.260927
	TIMP1	7076	TIMP metallopeptidase inhibitor 1	891.567	0.138754	0.131597	0.0732978	0.260927
	MEAF6	64769	MYST/Esa1 associated factor 6	247.844	-0.136289	0.0984731	0.0734894	0.261026
	RNF213	57674	ring finger protein 213	5553.48	0.134122	0.141066	0.0737443	0.261433
	CAMKK1	84254	calcium/calmodulin dependent protein kinase kinase 1	253.141	0.130566	0.147085	0.0736938	0.261433
	DENND11			231.105	-0.13461	0.140138	0.0737739	0.261433
	MTOR	2475	mechanistic target of rapamycin kinase	339.634	-0.140708	0.122975	0.0738507	0.261505
	TNFAIP2	7127	TNF alpha induced protein 2	7293.15	0.14036	0.110901	0.0742328	0.26152
	FKBP1A	2280	FKBP prolyl isomerase 1A	2815.76	0.140206	0.124193	0.0744207	0.26152
	ZNFX1	57169	zinc finger NFX1-type containing 1	1556.18	0.14011	0.124748	0.0743994	0.26152
	RPS19BP1	91582	ribosomal protein S19 binding protein 1	240.244	0.139189	0.106077	0.0741624	0.26152
	DCTN2	10540	dynactin subunit 2	533.301	0.138679	0.104276	0.0739403	0.26152
	FAM168A	23201	family with sequence similarity 168 member A	300.22	0.132882	0.0932466	0.0740937	0.26152
	TMED8	283578	transmembrane p24 trafficking protein family member 8	286.179	0.131774	0.144498	0.0743728	0.26152
	UBE2B	7320	ubiquitin conjugating enzyme E2 B	1223.23	0.129752	0.148071	0.0740003	0.26152
	NAMPTP1	646309	nicotinamide phosphoribosyltransferase pseudogene 1	1254.87	0.0916478	0.206855	0.0744072	0.26152
	PCSK7	9159	proprotein convertase subtilisin/kexin type 7	1232.69	-0.140659	0.112189	0.0740542	0.26152
	GPAT3	84803	glycerol-3-phosphate acyltransferase 3	537.997	0.135346	0.137885	0.0745419	0.261548
	EPHB4	2050	EPH receptor B4	278.117	0.110717	0.174925	0.0745137	0.261548
	RAB5C	5878	RAB5C, member RAS oncogene family	1878.91	0.140314	0.112204	0.0747508	0.262081
	STRN4	29888	striatin 4	260.886	0.139845	0.124688	0.0749314	0.262317
	NUP188	23511	nucleoporin 188	232.385	-0.133439	0.14113	0.0748867	0.262317
	GSTK1	373156	glutathione S-transferase kappa 1	604.462	0.140261	0.115097	0.0754522	0.262592
	PSMB6	5694	proteasome subunit beta 6	229.669	0.139575	0.109392	0.075205	0.262592
	ARHGAP30	257106	Rho GTPase activating protein 30	5526.81	0.139114	0.10832	0.0756301	0.262592
	MTMR1	8776	myotubularin related protein 1	355.96	0.138936	0.12719	0.0755635	0.262592
	E2F3	1871	E2F transcription factor 3	348.5	0.136115	0.135233	0.0754324	0.262592
	PRR5L	79899	proline rich 5 like	271.968	0.134988	0.137343	0.0756796	0.262592
	FYB1	2533	FYN binding protein 1	5263.52	0.127741	0.149748	0.0755352	0.262592
	PREB	10113	prolactin regulatory element binding	314.575	0.116897	0.0756228	0.0754939	0.262592
	PCED1B	91523	PC-esterase domain containing 1B	298.321	-0.135528	0.136354	0.0755621	0.262592
	LDLRAP1	26119	low density lipoprotein receptor adaptor protein 1	606.706	-0.136571	0.134324	0.0753254	0.262592
	NPIPA1	9284	nuclear pore complex interacting protein family member A1	300.721	-0.139719	0.123317	0.0756592	0.262592
	HOOK3	84376	hook microtubule tethering protein 3	357.136	-0.139981	0.11324	0.0756921	0.262592
	AVL9	23080	AVL9 cell migration associated	474.782	0.138527	0.127778	0.0760412	0.263408
	PRDX2	7001	peroxiredoxin 2	940.041	0.101865	0.187024	0.0760349	0.263408
	ARL11	115761	ADP ribosylation factor like GTPase 11	356.773	0.129396	0.146682	0.0761405	0.263555
	ACAP1	9744	ArfGAP with coiled-coil, ankyrin repeat and PH domains 1	2063.26	0.139558	0.122523	0.0762161	0.263619
	SPPL3	121665	signal peptide peptidase like 3	354.497	0.139595	0.113482	0.0765306	0.26372
	PRDX3	10935	peroxiredoxin 3	424.898	0.138484	0.107405	0.0764337	0.26372
	NRDC	4898	nardilysin convertase	465.876	0.134656	0.137091	0.076517	0.26372
	EGLN1	54583	egl-9 family hypoxia inducible factor 1	1422.38	0.129741	0.145827	0.0764869	0.26372
	RBBP4	5928	RB binding protein 4, chromatin remodeling factor	421.103	-0.137956	0.105647	0.0764305	0.26372
	RINL	126432	Ras and Rab interactor like	279.368	0.139498	0.112951	0.0766067	0.263785
	LONP1	9361	lon peptidase 1, mitochondrial	226.094	-0.139627	0.115004	0.0767228	0.263988
	SP140	11262	SP140 nuclear body protein	366.654	0.138976	0.111024	0.0771011	0.264825
	TMCO3	55002	transmembrane and coiled-coil domains 3	312.13	0.124427	0.153201	0.0771378	0.264825
	MTHFD2	10797	methylenetetrahydrofolate dehydrogenase (NADP+ dependent) 2, methenyltetrahydrofolate cyclohydrolase	229.975	0.12357	0.154432	0.077119	0.264825
	PSPC1	55269	paraspeckle component 1	238.593	-0.129393	0.0903396	0.0773458	0.265341
	SRA1	10011	steroid receptor RNA activator 1	382.698	0.136217	0.132385	0.0774969	0.265466
	RNF125	54941	ring finger protein 125	265.516	-0.139222	0.114268	0.0774448	0.265466
	CARS1			373.914	0.13823	0.125919	0.0775567	0.265474
	DHX34	9704	DExH-box helicase 34	1039.49	0.134183	0.136772	0.077691	0.265737
	NFE2L1	4779	nuclear factor, erythroid 2 like 1	586.635	0.136774	0.104272	0.0779368	0.266046
	SH3GLB2	56904	SH3 domain containing GRB2 like, endophilin B2	529.816	0.133913	0.137061	0.0779345	0.266046
	NADSYN1	55191	NAD synthetase 1	966.601	0.122917	0.082746	0.0779542	0.266046
	CD151	977	CD151 molecule (Raph blood group)	343.102	0.127571	0.147577	0.0783349	0.267148
	OAZ1	4946	ornithine decarboxylase antizyme 1	18123.7	0.121816	0.155599	0.0786759	0.268113
	YBX3	8531	Y-box binding protein 3	6710.24	0.0873402	0.208681	0.0789211	0.268553
	NAP1L1	4673	nucleosome assembly protein 1 like 1	1335.37	-0.138349	0.112578	0.0788959	0.268553
	UBE2G2	7327	ubiquitin conjugating enzyme E2 G2	538.641	-0.136482	0.104867	0.0790172	0.268682
	SNF8	11267	SNF8 subunit of ESCRT-II	275.942	0.137867	0.110889	0.0793805	0.269452
	SEC22B	9554	SEC22 homolog B, vesicle trafficking protein (gene/pseudogene)	853.314	0.137467	0.109097	0.0794771	0.269452
	CHMP2B	25978	charged multivesicular body protein 2B	318.648	0.132463	0.138347	0.0794466	0.269452
	CNN2	1265	calponin 2	6905.05	0.131951	0.139404	0.0793518	0.269452
	NNT	23530	nicotinamide nucleotide transhydrogenase	295.803	-0.136323	0.128987	0.0796556	0.26986
	GUCD1	83606	guanylyl cyclase domain containing 1	1066.2	0.136316	0.128395	0.0800386	0.27076
	ATP5PD	10476	ATP synthase peripheral stalk subunit d	310.771	0.134961	0.102081	0.0800278	0.27076
	GSN	2934	gelsolin	1688.08	0.13158	0.139298	0.0801666	0.270995
	LAT2	7462	linker for activation of T cells family member 2	1593.78	0.137743	0.12082	0.0803203	0.271128
	HEATR5B	54497	HEAT repeat containing 5B	256.82	-0.137744	0.113176	0.0803234	0.271128
	MYO1F	4542	myosin IF	12701.7	0.136872	0.125662	0.0804064	0.27121
	FCGRT	2217	Fc fragment of IgG receptor and transporter	3069.2	0.137603	0.120549	0.0806702	0.271563
	MOB1A	55233	MOB kinase activator 1A	2247.87	0.137151	0.123639	0.0807003	0.271563
	WDR26	80232	WD repeat domain 26	1870.32	0.13697	0.124717	0.0806374	0.271563
	STAU1	6780	staufen double-stranded RNA binding protein 1	593.248	0.136409	0.108092	0.0812519	0.271563
	NKIRAS2	28511	NFKB inhibitor interacting Ras like 2	343.701	0.136082	0.106238	0.0808519	0.271563
	ZBTB34	403341	zinc finger and BTB domain containing 34	487.601	0.135375	0.129428	0.0812751	0.271563
	RRAGA	10670	Ras related GTP binding A	351.125	0.133317	0.0995463	0.0811492	0.271563
	RAB43	339122	RAB43, member RAS oncogene family	1198.98	0.129098	0.14278	0.081096	0.271563
	STMP1	647087	short transmembrane mitochondrial protein 1	509.261	0.117149	0.16005	0.0810889	0.271563
	SRSF11	9295	serine and arginine rich splicing factor 11	826.692	-0.132612	0.0980671	0.0810567	0.271563
	RNF216	54476	ring finger protein 216	538.913	-0.132905	0.0983777	0.0807584	0.271563
	GAPT	202309	GRB2 binding adaptor protein, transmembrane	374.076	-0.133352	0.134773	0.0811086	0.271563
	TMEM63A	9725	transmembrane protein 63A	726.094	-0.136204	0.107198	0.0811905	0.271563
	MORF4L1	10933	mortality factor 4 like 1	1627.93	0.130643	0.0948762	0.0814406	0.27192
	MNT	4335	MAX network transcriptional repressor	560.024	0.136692	0.123881	0.0815589	0.271922
	UBA2	10054	ubiquitin like modifier activating enzyme 2	288.809	-0.136214	0.126083	0.0815462	0.271922
	RAB33B	83452	RAB33B, member RAS oncogene family	229.951	0.12473	0.149053	0.0816819	0.272135
	HLX	3142	H2.0 like homeobox	431.24	0.11994	0.155644	0.0818716	0.272571
	SEC63	11231	SEC63 homolog, protein translocation regulator	352.329	-0.136985	0.113488	0.0820214	0.272873
	MMP9	4318	matrix metallopeptidase 9	3492.73	0.105325	0.175307	0.0824013	0.27394
	GNG2	54331	G protein subunit gamma 2	1175.42	-0.133498	0.10136	0.0826249	0.274486
	ETFB	2109	electron transfer flavoprotein subunit beta	300.963	0.136705	0.118949	0.0828364	0.274991
	MARCHF6			524.497	0.136576	0.113833	0.0829775	0.275064
	UBE2M	9040	ubiquitin conjugating enzyme E2 M	515.682	0.132702	0.134171	0.0829485	0.275064
	CLTB	1212	clathrin light chain B	485.245	0.133267	0.132605	0.0831627	0.275086
	CREBRF	153222	CREB3 regulatory factor	1050.77	0.131062	0.137459	0.0830708	0.275086
	NUDT3	11165	nudix hydrolase 3	964.918	-0.133037	0.100842	0.0831577	0.275086
	MAP2K6	5608	mitogen-activated protein kinase kinase 6	276.651	0.11585	0.160133	0.0832263	0.275099
	NUAK2	81788	NUAK family kinase 2	957.641	0.132141	0.134926	0.0833908	0.275446
	CRIP1	1396	cysteine rich protein 1	665.772	-0.124548	0.147825	0.0835783	0.275788
	CHST12	55501	carbohydrate sulfotransferase 12	396.205	-0.135094	0.126578	0.0836136	0.275788
	MYLIP	29116	myosin regulatory light chain interacting protein	581.681	0.13398	0.129955	0.0837716	0.275918
	ITK	3702	IL2 inducible T cell kinase	650.303	-0.130064	0.138687	0.0837724	0.275918
	COX6B1	1340	cytochrome c oxidase subunit 6B1	710.686	0.135993	0.12106	0.0839615	0.27599
	GNA15	2769	G protein subunit alpha 15	222.993	0.133805	0.130177	0.0839735	0.27599
	MAP2K3	5606	mitogen-activated protein kinase kinase 3	2430.45	0.125697	0.145851	0.0838951	0.27599
	SNX1	6642	sorting nexin 1	1264.3	0.134435	0.12804	0.0841278	0.276204
	ODC1	4953	ornithine decarboxylase 1	630.646	0.117152	0.157648	0.0842025	0.276204
	FOXO4	4303	forkhead box O4	1038.87	0.107257	0.171006	0.084218	0.276204
	USP47	55031	ubiquitin specific peptidase 47	244.007	-0.135237	0.109223	0.0844305	0.276704
	NUDT22	84304	nudix hydrolase 22	229.125	0.132127	0.101222	0.0856561	0.280394
	CKAP4	10970	cytoskeleton associated protein 4	1070.36	0.122053	0.149835	0.0856775	0.280394
	RALBP1	10928	ralA binding protein 1	1624.99	0.12647	0.143151	0.0857553	0.28045
	TUBA4A	7277	tubulin alpha 4a	1539.47	0.134837	0.123039	0.0858354	0.280513
	GNAI2	2771	G protein subunit alpha i2	406.422	0.135219	0.113745	0.0859676	0.280746
	DNAJC4	3338	DnaJ heat shock protein family (Hsp40) member C4	319.532	0.134081	0.12557	0.0863262	0.281353
	PNRC1	10957	proline rich nuclear receptor coactivator 1	3001.5	0.132887	0.129678	0.0862762	0.281353
	ATP13A3	79572	ATPase 13A3	346.575	0.118815	0.153839	0.0863359	0.281353
	AKT2	208	AKT serine/threonine kinase 2	1181.45	0.134988	0.119668	0.0864673	0.281582
	TBCB	1155	tubulin folding cofactor B	399.29	0.129982	0.0975351	0.0865607	0.281688
	E2F4	1874	E2F transcription factor 4	686.013	0.131957	0.102128	0.0869482	0.28275
	ERGIC3	51614	ERGIC and golgi 3	587.146	0.111691	0.0749804	0.0875797	0.284603
	B3GNTL1	146712	UDP-GlcNAc:betaGal beta-1,3-N-acetylglucosaminyltransferase like 1	224.928	0.124368	0.144867	0.0877728	0.28503
	CTDP1	9150	CTD phosphatase subunit 1	320.018	0.133604	0.123106	0.0885306	0.286643
	CALM3	808	calmodulin 3	432.567	0.132764	0.126708	0.0885599	0.286643
	PTMA	5757	prothymosin alpha	3566.52	-0.125517	0.0914693	0.0885795	0.286643
	SLC35E1	79939	solute carrier family 35 member E1	356.89	-0.132249	0.104659	0.0884634	0.286643
	TCERG1	10915	transcription elongation regulator 1	219.521	-0.133174	0.125285	0.0884672	0.286643
	RFNG	5986	RFNG O-fucosylpeptide 3-beta-N-acetylglucosaminyltransferase	267.78	0.122731	0.146645	0.0886822	0.286774
	SIGLEC14	100049587	sialic acid binding Ig like lectin 14	1166.83	0.112778	0.160144	0.0887576	0.286817
	CXCR2	3579	C-X-C motif chemokine receptor 2	12122.6	0.123278	0.145685	0.0888845	0.286826
	TFCP2	7024	transcription factor CP2	232.007	-0.120054	0.0843911	0.0888506	0.286826
	CD163	9332	CD163 molecule	474.006	0.119084	0.151592	0.0889847	0.286949
	CEBPD	1052	CCAAT enhancer binding protein delta	2547.99	0.121359	0.148284	0.0891686	0.287342
	U2AF1	7307	U2 small nuclear RNA auxiliary factor 1	551.46	0.0970155	0.181359	0.0894071	0.287909
	SQSTM1	8878	sequestosome 1	2391.18	0.133569	0.115533	0.0899602	0.288954
	H2AZ1			720.037	0.133431	0.1133	0.0899815	0.288954
	UBE2J2	118424	ubiquitin conjugating enzyme E2 J2	240.887	0.131372	0.10388	0.0899268	0.288954
	CHSY1	22856	chondroitin sulfate synthase 1	590.241	0.123038	0.145319	0.0898715	0.288954
	RBM3	5935	RNA binding motif protein 3	1121.63	-0.133348	0.119698	0.0901612	0.28933
	SNX15	29907	sorting nexin 15	233.594	0.128024	0.136648	0.0902352	0.289366
	MTMR4	9110	myotubularin related protein 4	403.9	0.133061	0.121147	0.0904522	0.289861
	ANAPC1	64682	anaphase promoting complex subunit 1	219.177	-0.132593	0.109144	0.0905163	0.289866
	ZCCHC3	85364	zinc finger CCHC-type containing 3	217.366	-0.112158	0.0765054	0.0906651	0.290141
	OAS2	4939	2'-5'-oligoadenylate synthetase 2	935.126	-0.110357	0.161932	0.0907348	0.290163
	LCP2	3937	lymphocyte cytosolic protein 2	1022	0.132458	0.123175	0.0910954	0.291115
	SMARCA2	6595	SWI/SNF related, matrix associated, actin dependent regulator of chromatin, subfamily a, member 2	730.242	-0.130242	0.10226	0.0912127	0.291288
	IL1R1	3554	interleukin 1 receptor type 1	235.807	0.115879	0.154175	0.0915242	0.292081
	HERC3	8916	HECT and RLD domain containing E3 ubiquitin protein ligase 3	522.706	0.132805	0.11414	0.0916052	0.292085
	WAC	51322	WW domain containing adaptor with coiled-coil	1454.37	0.130885	0.104545	0.0916636	0.292085
	ABLIM1	3983	actin binding LIM protein 1	567.788	-0.124011	0.142448	0.091715	0.292085
	TDP2	51567	tyrosyl-DNA phosphodiesterase 2	726.661	0.123424	0.142928	0.0923191	0.293713
	VPS36	51028	vacuolar protein sorting 36 homolog	294.831	-0.132218	0.11143	0.0923535	0.293713
	PPP2CB	5516	protein phosphatase 2 catalytic subunit beta	224.766	0.130829	0.105358	0.0924346	0.293727
	PIP4P2	55529	phosphatidylinositol-4,5-bisphosphate 4-phosphatase 2	414.01	0.128744	0.132995	0.092485	0.293727
	NDUFA13	51079	NADH:ubiquinone oxidoreductase subunit A13	384.898	0.120915	0.0871938	0.0925562	0.293752
	NUDT5	11164	nudix hydrolase 5	363.492	0.130588	0.127931	0.0926378	0.293809
	TUBA1B	10376	tubulin alpha 1b	2011.48	0.131505	0.108458	0.0927834	0.294069
	SATB1	6304	SATB homeobox 1	380.444	-0.131383	0.124346	0.0930234	0.294627
	WDR83OS	51398	WD repeat domain 83 opposite strand	351.518	0.131627	0.110167	0.0933071	0.295121
	TOMM20	9804	translocase of outer mitochondrial membrane 20	354.755	-0.12429	0.0923673	0.093269	0.295121
	HS1BP3	64342	HCLS1 binding protein 3	330.638	0.131285	0.108606	0.0934007	0.295215
	RELA	5970	RELA proto-oncogene, NF-kB subunit	755.991	0.126098	0.0955004	0.0934841	0.295277
	SCO2	9997	SCO cytochrome c oxidase assembly protein 2	309.131	0.115122	0.153838	0.093554	0.295296
	DEF6	50619	DEF6 guanine nucleotide exchange factor	1532.74	0.131922	0.118659	0.0936832	0.295432
	IFNAR2	3455	interferon alpha and beta receptor subunit 2	1101.29	0.130335	0.127215	0.0937251	0.295432
	C11orf68	83638	chromosome 11 open reading frame 68	329.934	0.131346	0.109818	0.0938419	0.295599
	RRAGC	64121	Ras related GTP binding C	321.789	0.131535	0.11175	0.0941103	0.296063
	CHMP3	51652	charged multivesicular body protein 3	827.929	0.131029	0.123683	0.0941815	0.296063
	BPNT2			241.52	-0.125498	0.0948868	0.0941336	0.296063
	CPEB4	80315	cytoplasmic polyadenylation element binding protein 4	284.317	0.0908989	0.186507	0.0942573	0.2961
	GALNT2	2590	polypeptide N-acetylgalactosaminyltransferase 2	489.279	0.124547	0.139531	0.0943771	0.296275
	MYL12B	103910	myosin light chain 12B	1308.35	0.130691	0.124182	0.0947279	0.297174
	FBRS	64319	fibrosin	654.521	0.13098	0.120662	0.0954813	0.297759
	FCN1	2219	ficolin 1	10733.9	0.130933	0.122021	0.0951306	0.297759
	PPP3R1	5534	protein phosphatase 3 regulatory subunit B, alpha	997.209	0.130614	0.108928	0.0952242	0.297759
	TFIP11	24144	tuftelin interacting protein 11	463.054	0.130329	0.108112	0.0954942	0.297759
	MEFV	4210	MEFV innate immuity regulator, pyrin	2389.15	0.122567	0.142228	0.0951365	0.297759
	RNF187	149603	ring finger protein 187	998.607	0.118345	0.148308	0.0953642	0.297759
	ISY1-RAB43	100534599	ISY1-RAB43 readthrough	262	0.10651	0.164048	0.0949906	0.297759
	BAG1	573	BCL2 associated athanogene 1	2153.81	0.0977387	0.175435	0.0954928	0.297759
	UTP6	55813	UTP6 small subunit processome component	261.845	-0.131194	0.113696	0.095414	0.297759
	LYSMD2	256586	LysM domain containing 2	291.001	0.129995	0.125612	0.0955664	0.297783
	PMF1	11243	polyamine modulated factor 1	287.212	0.12846	0.102318	0.0957386	0.297883
	MARK3	4140	microtubule affinity regulating kinase 3	487.952	0.12457	0.138414	0.0957537	0.297883
	SRSF3	6428	serine and arginine rich splicing factor 3	860.095	-0.12446	0.0942172	0.0958345	0.297883
	EVL	51466	Enah/Vasp-like	2031.06	-0.127568	0.132294	0.0958565	0.297883
	PTPN6	5777	protein tyrosine phosphatase non-receptor type 6	831.126	0.130059	0.124516	0.0960518	0.29829
	NPL	80896	N-acetylneuraminate pyruvate lyase	1234.84	0.12207	0.142215	0.096254	0.298717
	ASAP1	50807	ArfGAP with SH3 domain, ankyrin repeat and PH domain 1	1060.6	0.128753	0.128585	0.0964073	0.298978
	STAT1	6772	signal transducer and activator of transcription 1	5015.97	0.116308	0.150364	0.0965122	0.298978
	ELK4	2005	ETS transcription factor ELK4	337.263	-0.130815	0.115252	0.0965322	0.298978
	TACC3	10460	transforming acidic coiled-coil containing protein 3	1651.76	0.130684	0.115663	0.0968741	0.299836
	GANAB	23193	glucosidase II alpha subunit	1051.26	-0.111955	0.0786873	0.0974314	0.301359
	GBP3	2635	guanylate binding protein 3	236.817	0.107324	0.161367	0.097531	0.301465
	OSTF1	26578	osteoclast stimulating factor 1	1414.03	0.129865	0.122252	0.0976108	0.30151
	FEM1C	56929	fem-1 homolog C	294.332	0.125314	0.135338	0.0978042	0.301906
	GPR132	29933	G protein-coupled receptor 132	343.353	0.130086	0.115147	0.0983337	0.303338
	FUBP1	8880	far upstream element binding protein 1	421.891	-0.127019	0.101348	0.098481	0.30359
	KPNA4	3840	karyopherin subunit alpha 4	650.183	0.12947	0.110828	0.0989426	0.304336
	ACER3	55331	alkaline ceramidase 3	296.888	0.122355	0.139792	0.0989867	0.304336
	SAMSN1	64092	SAM domain, SH3 domain and nuclear localization signals 1	309.21	0.108687	0.158809	0.0988655	0.304336
	SMG1	23049	SMG1 nonsense mediated mRNA decay associated PI3K related kinase	1207.42	-0.12892	0.107725	0.0988404	0.304336
	BAZ2A	11176	bromodomain adjacent to zinc finger domain 2A	1748.7	0.129782	0.11507	0.0990929	0.30446
	ANXA11	311	annexin A11	3474.8	0.128362	0.126009	0.0992386	0.304503
	RELL1	768211	RELT like 1	341.896	-0.117002	0.147718	0.0992135	0.304503
	FGD3	89846	FYVE, RhoGEF and PH domain containing 3	3900.02	0.129383	0.113616	0.0999267	0.304799
	ABHD3	171586	abhydrolase domain containing 3	455.388	0.129317	0.119126	0.0999613	0.304799
	C6orf89	221477	chromosome 6 open reading frame 89	803.003	0.123587	0.0953836	0.0999891	0.304799
	PGAM1	5223	phosphoglycerate mutase 1	2149.52	0.122317	0.093205	0.0999947	0.304799
	FCAR	2204	Fc fragment of IgA receptor	785.965	0.1051	0.162917	0.0995898	0.304799
	ERCC5	2073	ERCC excision repair 5, endonuclease	478.549	-0.124988	0.0980075	0.0999064	0.304799
	RIF1	55183	replication timing regulatory factor 1	251.859	-0.127857	0.127002	0.0997764	0.304799
	GNL3L	54552	G protein nucleolar 3 like	471.787	-0.128051	0.105698	0.0997264	0.304799
	TSC1	7248	TSC complex subunit 1	331.501	-0.128548	0.10783	0.0998641	0.304799
	SPTAN1	6709	spectrin alpha, non-erythrocytic 1	997.088	-0.12862	0.12403	0.0998116	0.304799
	NDUFA2	4695	NADH:ubiquinone oxidoreductase subunit A2	218.238	0.106461	0.16038	0.10093	0.307448
	BRK1	55845	BRICK1 subunit of SCAR/WAVE actin nucleating complex	629.956	0.128633	0.110913	0.101126	0.307592
	NCF1	653361	neutrophil cytosolic factor 1	7647.79	0.127585	0.125973	0.101177	0.307592
	ZMAT3	64393	zinc finger matrin-type 3	216.876	-0.119887	0.0900187	0.101046	0.307592
	ATP8B2	57198	ATPase phospholipid transporting 8B2	589.727	-0.125363	0.132096	0.101297	0.307755
	NBN	4683	nibrin	592.64	0.114016	0.150081	0.102	0.309482
	DCAF12	25853	DDB1 and CUL4 associated factor 12	4395.94	0.0896768	0.182199	0.101979	0.309482
	QRICH1	54870	glutamine rich 1	529.365	-0.126619	0.103954	0.102086	0.309541
	N4BP1	9683	NEDD4 binding protein 1	1300.65	0.125591	0.130487	0.102369	0.310194
	JKAMP	51528	JNK1/MAPK8 associated membrane protein	224.182	0.128269	0.119286	0.102581	0.310313
	SHOC2	8036	SHOC2 leucine rich repeat scaffold protein	736.436	0.127821	0.122281	0.102687	0.310313
	FAR1	84188	fatty acyl-CoA reductase 1	792.224	0.126142	0.128511	0.102811	0.310313
	RBM10	8241	RNA binding motif protein 10	474.486	0.124431	0.0990559	0.102773	0.310313
	PRKACB	5567	protein kinase cAMP-activated catalytic subunit beta	379.369	-0.12388	0.134039	0.102754	0.310313
	SNX5	27131	sorting nexin 5	422.796	-0.124111	0.0982896	0.102668	0.310313
	FLT3LG	2323	fms related tyrosine kinase 3 ligand	303.951	-0.125449	0.130247	0.102954	0.310542
	DCTN4	51164	dynactin subunit 4	352.72	0.127918	0.111302	0.103133	0.310706
	UPK3BL1	100134938	uroplakin 3B like 1	275.426	-0.115003	0.148077	0.103143	0.310706
	DUSP7	1849	dual specificity phosphatase 7	294.361	-0.127927	0.120187	0.10321	0.310706
	TRIM4	89122	tripartite motif containing 4	220.193	-0.121865	0.0949479	0.1041	0.313183
	NRBP1	29959	nuclear receptor binding protein 1	855.079	0.12399	0.0992729	0.104262	0.313464
	NPEPL1	79716	aminopeptidase like 1	279.241	0.120355	0.139292	0.104434	0.313778
	HDAC7	51564	histone deacetylase 7	768.601	0.127436	0.119229	0.104748	0.313905
	SAMD8	142891	sterile alpha motif domain containing 8	314.81	0.125163	0.129221	0.10464	0.313905
	C17orf49	124944	chromosome 17 open reading frame 49	347.061	0.111917	0.0812997	0.104684	0.313905
	GMPR	2766	guanosine monophosphate reductase	964.303	0.0817291	0.192397	0.104645	0.313905
	GBP4	115361	guanylate binding protein 4	1271.96	0.10418	0.160921	0.104909	0.314182
	FBXW5	54461	F-box and WD repeat domain containing 5	1004.92	0.123963	0.0998306	0.105023	0.314321
	NUFIP2	57532	nuclear FMR1 interacting protein 2	1087.43	0.12738	0.115863	0.10532	0.315005
	APOBR	55911	apolipoprotein B receptor	3616.26	0.108791	0.154856	0.105446	0.315178
	PRUNE1	58497	prune exopolyphosphatase 1	221.514	0.124545	0.101902	0.105749	0.315881
	WASH6P	653440	WASP family homolog 6, pseudogene	727.991	0.126891	0.111202	0.105831	0.31592
	NFYC	4802	nuclear transcription factor Y subunit gamma	676.69	0.126613	0.109827	0.106032	0.316219
	ARAP1	116985	ArfGAP with RhoGAP domain, ankyrin repeat and PH domain 1	4688.3	0.126146	0.124044	0.106072	0.316219
	PTMS	5763	parathymosin	252.733	0.0873685	0.182589	0.106136	0.316219
	VAV3	10451	vav guanine nucleotide exchange factor 3	290.493	0.126572	0.121254	0.106351	0.316606
	DNAJC3	5611	DnaJ heat shock protein family (Hsp40) member C3	745.281	0.125676	0.125422	0.106403	0.316606
	GNAS	2778	GNAS complex locus	6960.67	0.111436	0.150798	0.106672	0.317057
	LBH	81606	LBH regulator of WNT signaling pathway	998.428	-0.119063	0.139903	0.106692	0.317057
	CCDC93	54520	coiled-coil domain containing 93	391.998	0.125625	0.106663	0.106923	0.317131
	GARS1			311.734	0.106633	0.0762319	0.106862	0.317131
	ELMO1	9844	engulfment and cell motility 1	522.405	-0.126662	0.118808	0.106882	0.317131
	CAPZB	832	capping actin protein of muscle Z-line subunit beta	3154.2	0.126403	0.111642	0.107294	0.317621
	C2CD3	26005	C2 calcium dependent domain containing 3	467.592	0.125348	0.106027	0.107232	0.317621
	CDC42EP3	10602	CDC42 effector protein 3	1297.34	0.124422	0.128453	0.107237	0.317621
	DDX24	57062	DEAD-box helicase 24	768.359	-0.126142	0.1213	0.107467	0.31793
	ADAMTSL4	54507	ADAMTS like 4	351.597	0.124992	0.125616	0.108055	0.319017
	UBE3B	89910	ubiquitin protein ligase E3B	328.472	0.121112	0.0960825	0.108014	0.319017
	YKT6	10652	YKT6 v-SNARE homolog	542.946	0.112457	0.0832348	0.10805	0.319017
	VAMP1	6843	vesicle associated membrane protein 1	343.23	-0.124461	0.104084	0.108111	0.319017
	WWC3	55841	WWC family member 3	904.203	0.126028	0.115996	0.108938	0.319486
	TET3	200424	tet methylcytosine dioxygenase 3	559.956	0.125872	0.119281	0.108876	0.319486
	AGPAT3	56894	1-acylglycerol-3-phosphate O-acyltransferase 3	480.972	0.125695	0.121363	0.10863	0.319486
	ATP5MG	10632	ATP synthase membrane subunit g	336.719	0.122241	0.132548	0.108629	0.319486
	TRIR	79002	telomerase RNA component interacting RNase	1093.64	0.120103	0.0947738	0.108899	0.319486
	YIPF6	286451	Yip1 domain family member 6	280.836	0.109208	0.152666	0.108488	0.319486
	PNPLA2	57104	patatin like phospholipase domain containing 2	2494.97	0.107942	0.154295	0.108428	0.319486
	CCR1	1230	C-C motif chemokine receptor 1	1404.38	0.104019	0.15892	0.108883	0.319486
	DOP1B	9980	DOP1 leucine zipper like protein B	236.489	-0.124335	0.1267	0.108961	0.319486
	MYCBP2	23077	MYC binding protein 2	457.274	-0.125888	0.11123	0.108566	0.319486
	ARHGAP26	23092	Rho GTPase activating protein 26	1812.93	0.124186	0.126404	0.109589	0.320918
	SULT1A1	6817	sulfotransferase family 1A member 1	316.581	-0.115394	0.143769	0.10955	0.320918
	PLCG1	5335	phospholipase C gamma 1	545.448	-0.118384	0.13903	0.109724	0.321113
	FASN	2194	fatty acid synthase	215.694	-0.116926	0.141083	0.110189	0.322268
	ANP32A	8125	acidic nuclear phosphoprotein 32 family member A	1892.7	0.123339	0.103443	0.110696	0.323547
	TSG101	7251	tumor susceptibility 101	437.721	0.125279	0.117576	0.110849	0.323583
	SEPTIN2	4735	septin 2	1166.62	-0.0934277	0.0646834	0.110785	0.323583
	DDX6	1656	DEAD-box helicase 6	1579.05	-0.102572	0.0733025	0.11095	0.323674
	FKBP15	23307	FKBP prolyl isomerase 15	966.331	0.125073	0.118122	0.111321	0.324552
	KMT2B	9757	lysine methyltransferase 2B	918.034	0.124875	0.11905	0.111651	0.325074
	TMEM43	79188	transmembrane protein 43	1003.07	0.122596	0.102248	0.111637	0.325074
	EPN1	29924	epsin 1	226.242	0.108577	0.15176	0.111711	0.325074
	ABR	29	ABR activator of RhoGEF and GTPase	1199	0.123587	0.105761	0.111983	0.325251
	MTHFD1	4522	methylenetetrahydrofolate dehydrogenase, cyclohydrolase and formyltetrahydrofolate synthetase 1	219.937	0.117647	0.0922825	0.111913	0.325251
	ATP6V1F	9296	ATPase H+ transporting V1 subunit F	383.206	0.102984	0.0740099	0.111945	0.325251
	DYNC1I2	1781	dynein cytoplasmic 1 intermediate chain 2	279.943	-0.121086	0.0989017	0.112086	0.325344
	SHISA5	51246	shisa family member 5	4346.51	0.118038	0.138014	0.112165	0.325369
	ARIH1	25820	ariadne RBR E3 ubiquitin protein ligase 1	527.222	0.123833	0.107791	0.112686	0.326062
	HCST	10870	hematopoietic cell signal transducer	438.475	0.121538	0.100322	0.112549	0.326062
	ZDHHC7	55625	zinc finger DHHC-type containing 7	1121.85	0.117034	0.0915958	0.112493	0.326062
	EIF3F	8665	eukaryotic translation initiation factor 3 subunit F	1280.54	-0.123084	0.104811	0.11266	0.326062
	LRRC47	57470	leucine rich repeat containing 47	279.075	-0.12421	0.110173	0.112848	0.326326
	MAP4K4	9448	mitogen-activated protein kinase kinase kinase kinase 4	1982.46	0.124239	0.120274	0.113021	0.326536
	PSMD2	5708	proteasome 26S subunit, non-ATPase 2	864.395	0.121622	0.101087	0.113203	0.326536
	GNB1	2782	G protein subunit beta 1	3021.11	0.120117	0.0975302	0.113072	0.326536
	MYL6	4637	myosin light chain 6	3108.56	0.108861	0.150659	0.113139	0.326536
	NCOR1	9611	nuclear receptor corepressor 1	964.162	-0.124095	0.111742	0.113741	0.327884
	G3BP1	10146	G3BP stress granule assembly factor 1	621.228	-0.123781	0.109613	0.11382	0.327908
	LAPTM5	7805	lysosomal protein transmembrane 5	15357.2	0.123499	0.108237	0.113912	0.327966
	ADA2	51816	adenosine deaminase 2	1674.02	-0.121073	0.13036	0.114219	0.328441
	U2SURP	23350	U2 snRNP associated SURP domain containing	404.4	-0.123648	0.121355	0.114218	0.328441
	STK40	83931	serine/threonine kinase 40	2762.36	0.12076	0.131042	0.114303	0.328478
	FADD	8772	Fas associated via death domain	379.448	0.119934	0.132593	0.114681	0.329359
	NINJ1	4814	ninjurin 1	1981.86	0.123232	0.122479	0.114816	0.329544
	RALY	22913	RALY heterogeneous nuclear ribonucleoprotein	1410.23	0.119883	0.0983593	0.114938	0.329687
	DDX27	55661	DEAD-box helicase 27	308.461	-0.120387	0.0996723	0.115158	0.330116
	PTK2B	2185	protein tyrosine kinase 2 beta	2351.19	0.123231	0.10927	0.115241	0.330147
	CCPG1	9236	cell cycle progression 1	1143.1	0.120263	0.13117	0.11551	0.330714
	LAPTM4A	9741	lysosomal protein transmembrane 4 alpha	762.624	0.123481	0.118236	0.115743	0.330891
	TBC1D14	57533	TBC1 domain family member 14	1447.11	0.119249	0.133288	0.115651	0.330891
	RHOB	388	ras homolog family member B	970.271	-0.116624	0.138089	0.115787	0.330891
	P4HB	5034	prolyl 4-hydroxylase subunit beta	2082.93	0.112241	0.0861981	0.116048	0.331432
	CD46	4179	CD46 molecule	3444.42	0.123241	0.118322	0.116407	0.331765
	ZNF740	283337	zinc finger protein 740	386.698	0.123165	0.118902	0.116478	0.331765
	PGGT1B	5229	protein geranylgeranyltransferase type I subunit beta	253.383	0.122418	0.107685	0.116725	0.331765
	YTHDF3	253943	YTH N6-methyladenosine RNA binding protein 3	571.969	0.122145	0.10651	0.116739	0.331765
	ANTXR2	118429	ANTXR cell adhesion molecule 2	833.573	0.121252	0.127462	0.116671	0.331765
	BST2	684	bone marrow stromal cell antigen 2	868.568	0.112095	0.144678	0.116348	0.331765
	RPN1	6184	ribophorin I	1530.31	0.110908	0.0846941	0.116726	0.331765
	HELB	92797	DNA helicase B	315.43	-0.123338	0.114809	0.116445	0.331765
	GIMAP8	155038	GTPase, IMAP family member 8	738.565	0.121304	0.103667	0.116855	0.331892
	MUL1	79594	mitochondrial E3 ubiquitin protein ligase 1	240.839	0.121863	0.105898	0.117116	0.331954
	LRRK2	120892	leucine rich repeat kinase 2	2363.72	0.114004	0.141412	0.117236	0.331954
	GNA12	2768	G protein subunit alpha 12	485.35	0.1053	0.153091	0.117214	0.331954
	AFF1	4299	AF4/FMR2 family member 1	575.372	0.0938303	0.16721	0.117025	0.331954
	GLG1	2734	golgi glycoprotein 1	853.696	-0.115181	0.0909392	0.116988	0.331954
	DNAJB1	3337	DnaJ heat shock protein family (Hsp40) member B1	652.144	0.122392	0.121605	0.117641	0.332169
	ATG16L2	89849	autophagy related 16 like 2	5008.1	0.122101	0.122692	0.117887	0.332169
	MIDN	90007	midnolin	2083.11	0.117087	0.136051	0.117677	0.332169
	RARA	5914	retinoic acid receptor alpha	1288.52	0.115965	0.137918	0.11784	0.332169
	TMEM183A	92703	transmembrane protein 183A	627.458	0.115056	0.139657	0.11744	0.332169
	PPT1	5538	palmitoyl-protein thioesterase 1	2606.9	0.113882	0.141305	0.117754	0.332169
	SULF2	55959	sulfatase 2	1323.49	-0.115212	0.13916	0.117854	0.332169
	CALHM2	51063	calcium homeostasis modulator family member 2	235.949	-0.11928	0.131615	0.117689	0.332169
	LILRB1	10859	leukocyte immunoglobulin like receptor B1	652.879	0.116603	0.136651	0.118091	0.332542
	TOR1AIP1	26092	torsin 1A interacting protein 1	936.293	0.121765	0.107264	0.118388	0.33297
	STK10	6793	serine/threonine kinase 10	510.463	0.121359	0.105577	0.118367	0.33297
	SULT1B1	27284	sulfotransferase family 1B member 1	1080.98	0.110129	0.146199	0.118611	0.333396
	HNRNPA1	3178	heterogeneous nuclear ribonucleoprotein A1	1667.55	-0.121521	0.106785	0.11879	0.333695
	DNAJB6	10049	DnaJ heat shock protein family (Hsp40) member B6	1032.16	0.122411	0.115507	0.119148	0.333762
	KARS1			749.165	0.121299	0.1067	0.119396	0.333762
	SPSB3	90864	splA/ryanodine receptor domain and SOCS box containing 3	647.238	0.1199	0.128835	0.119117	0.333762
	CWC25	54883	CWC25 spliceosome associated protein homolog	381.168	0.118444	0.0980601	0.118913	0.333762
	FAM8A1	51439	family with sequence similarity 8 member A1	1327.09	0.114912	0.138775	0.119317	0.333762
	CEP19	84984	centrosomal protein 19	243.262	0.114235	0.139992	0.119097	0.333762
	USP19	10869	ubiquitin specific peptidase 19	663.395	0.113369	0.0892603	0.119329	0.333762
	ITGA4	3676	integrin subunit alpha 4	1088.95	-0.121837	0.12113	0.119464	0.333762
	MADD	8567	MAP kinase activating death domain	466.48	-0.122258	0.113144	0.119402	0.333762
	FKBP4	2288	FKBP prolyl isomerase 4	243.857	0.106211	0.150789	0.119622	0.333967
	H2AJ			222.579	0.103318	0.154337	0.119682	0.333967
	MARCHF7			1137.01	0.12199	0.115427	0.120386	0.334279
	TBC1D10B	26000	TBC1 domain family member 10B	772.653	0.121819	0.117868	0.120621	0.334279
	PHF12	57649	PHD finger protein 12	1233.25	0.121378	0.122363	0.120154	0.334279
	MTMR3	8897	myotubularin related protein 3	1880.21	0.121348	0.122309	0.12027	0.334279
	COQ10B	80219	coenzyme Q10B	224.52	0.120985	0.124107	0.120178	0.334279
	ZNF787	126208	zinc finger protein 787	468.531	0.117537	0.133404	0.12024	0.334279
	PAG1	55824	phosphoprotein membrane anchor with glycosphingolipid microdomains 1	794.033	0.112383	0.141995	0.120572	0.334279
	ARHGEF12	23365	Rho guanine nucleotide exchange factor 12	283.458	0.0969103	0.161653	0.120564	0.334279
	HSPB1	3315	heat shock protein family B (small) member 1	284.96	0.0869003	0.174321	0.120429	0.334279
	CS	1431	citrate synthase	762.589	-0.110822	0.086082	0.120446	0.334279
	MRFAP1L1	114932	Morf4 family associated protein 1 like 1	295.278	-0.110982	0.0863921	0.120661	0.334279
	DNAJC8	22826	DnaJ heat shock protein family (Hsp40) member C8	301.568	-0.114961	0.0921482	0.120054	0.334279
	SH3GL1	6455	SH3 domain containing GRB2 like 1, endophilin A2	468.438	0.121411	0.120386	0.12103	0.334899
	CASC3	22794	CASC3 exon junction complex subunit	321.197	0.115702	0.13639	0.120996	0.334899
	AGAP2	116986	ArfGAP with GTPase domain, ankyrin repeat and PH domain 2	647.535	0.121324	0.119897	0.121482	0.334944
	PAIP2	51247	poly(A) binding protein interacting protein 2	779.512	0.121124	0.108854	0.12126	0.334944
	H6PD	9563	hexose-6-phosphate dehydrogenase/glucose 1-dehydrogenase	609.724	0.118787	0.100722	0.121346	0.334944
	EPG5	57724	ectopic P-granules autophagy protein 5 homolog	259.813	0.11302	0.140566	0.121425	0.334944
	SUCLG1	8802	succinate-CoA ligase alpha subunit	292.737	0.101694	0.0753533	0.121133	0.334944
	ZFX	7543	zinc finger protein X-linked	250.495	-0.121638	0.114463	0.121401	0.334944
	PHYKPL	85007	5-phosphohydroxy-L-lysine phospho-lyase	443.987	0.121282	0.111087	0.121769	0.335536
	TMEM248	55069	transmembrane protein 248	694.402	0.111625	0.0879484	0.122166	0.336429
	HNRNPL	3191	heterogeneous nuclear ribonucleoprotein L	1857.08	0.0974475	0.0712695	0.122278	0.336537
	CSF2RA	1438	colony stimulating factor 2 receptor alpha subunit	860.891	0.119169	0.127703	0.122374	0.3366
	PLAUR	5329	plasminogen activator, urokinase receptor	1012.71	0.116148	0.13454	0.122556	0.336702
	FAM126B	285172	family with sequence similarity 126 member B	1035.74	0.111606	0.142099	0.122524	0.336702
	MON1B	22879	MON1 homolog B, secretory trafficking associated	707.04	0.120926	0.111006	0.122816	0.337214
	UBE2Q1	55585	ubiquitin conjugating enzyme E2 Q1	609.11	0.120343	0.122693	0.122985	0.337479
	ERGIC1	57222	endoplasmic reticulum-golgi intermediate compartment 1	2877.87	0.112209	0.140784	0.123291	0.338116
	STIM1	6786	stromal interaction molecule 1	715.503	0.108918	0.0848044	0.123713	0.338671
	BAZ1B	9031	bromodomain adjacent to zinc finger domain 1B	392.424	-0.117109	0.0984354	0.123639	0.338671
	PARP12	64761	poly(ADP-ribose) polymerase family member 12	562.325	-0.117484	0.130917	0.123658	0.338671
	INO80	54617	INO80 complex ATPase subunit	232.309	-0.111959	0.140893	0.123794	0.338694
	CDC42SE1	56882	CDC42 small effector 1	6307.49	0.119591	0.105939	0.124045	0.339156
	DPYD	1806	dihydropyrimidine dehydrogenase	871.091	0.117458	0.130554	0.124184	0.339156
	CD14	929	CD14 molecule	715.211	0.106019	0.148889	0.124148	0.339156
	UBAC1	10422	UBA domain containing 1	311.827	0.120236	0.120411	0.124502	0.339224
	DICER1	23405	dicer 1, ribonuclease III	929.812	0.118513	0.127603	0.124394	0.339224
	ZC3H13	23091	zinc finger CCCH-type containing 13	483.951	-0.116725	0.0981758	0.124497	0.339224
	ARHGEF7	8874	Rho guanine nucleotide exchange factor 7	291.878	-0.120059	0.108792	0.124479	0.339224
	POLDIP2	26073	DNA polymerase delta interacting protein 2	402.094	0.118488	0.103033	0.124871	0.339857
	SSR4	6748	signal sequence receptor subunit 4	528.018	0.114684	0.0942819	0.124882	0.339857
	MICAL1	64780	microtubule associated monooxygenase, calponin and LIM domain containing 1	1463.52	0.1204	0.113325	0.125011	0.339963
	NPIPB5	100132247	nuclear pore complex interacting protein family member B5	1513.63	-0.120275	0.118505	0.125068	0.339963
	RHOA	387	ras homolog family member A	6082.66	0.118092	0.102627	0.125699	0.341477
	COTL1	23406	coactosin like F-actin binding protein 1	11367.5	0.119868	0.119799	0.125866	0.341731
	ZNF266	10781	zinc finger protein 266	415.764	-0.119572	0.120514	0.12646	0.343143
	SCYL1	57410	SCY1 like pseudokinase 1	281.803	0.114935	0.134202	0.126578	0.343261
	GTF2IP20	441124	general transcription factor IIi pseudogene 20	236.945	0.115012	0.13388	0.126834	0.343333
	NIPA2	81614	NIPA magnesium transporter 2	361.938	0.114444	0.094981	0.126892	0.343333
	RANBP10	57610	RAN binding protein 10	601.843	0.0955048	0.160446	0.126793	0.343333
	SFT2D2	375035	SFT2 domain containing 2	603.905	-0.11689	0.100353	0.126902	0.343333
	TLR4	7099	toll like receptor 4	2465.47	0.107959	0.144883	0.127236	0.344036
	AC018638.4			213.733	0.11966	0.115421	0.127423	0.344272
	NEK6	10783	NIMA related kinase 6	230.534	0.118751	0.12299	0.127569	0.344272
	GNAQ	2776	G protein subunit alpha q	916.421	0.11805	0.125717	0.127571	0.344272
	SMARCC2	6601	SWI/SNF related, matrix associated, actin dependent regulator of chromatin subfamily c member 2	819.857	-0.118401	0.105738	0.127621	0.344272
	AKAP13	11214	A-kinase anchoring protein 13	2370.84	0.119392	0.114619	0.128248	0.344991
	TRPM2	7226	transient receptor potential cation channel subfamily M member 2	236.185	0.113169	0.136467	0.128163	0.344991
	DCAF11	80344	DDB1 and CUL4 associated factor 11	1139.07	0.112461	0.137733	0.128071	0.344991
	RNF20	56254	ring finger protein 20	425.807	0.111659	0.0908258	0.128344	0.344991
	MX1	4599	MX dynamin like GTPase 1	1420.84	-0.0907367	0.16544	0.128411	0.344991
	SLC35E3	55508	solute carrier family 35 member E3	319.818	-0.104935	0.148362	0.12831	0.344991
	PPP1R16B	26051	protein phosphatase 1 regulatory subunit 16B	364.018	-0.116071	0.130482	0.128385	0.344991
	SEC61A1	29927	SEC61 translocon alpha 1 subunit	1005.75	0.10042	0.076144	0.128593	0.345281
	ARHGDIB	397	Rho GDP dissociation inhibitor beta	10086.5	0.119028	0.111544	0.128858	0.345452
	CSAD	51380	cysteine sulfinic acid decarboxylase	425.145	0.117791	0.125115	0.128881	0.345452
	NELFE	7936	negative elongation factor complex member E	328.638	0.113119	0.0935394	0.128738	0.345452
	PBX2	5089	PBX homeobox 2	2256.33	0.118672	0.110238	0.129512	0.346856
	WDFY1	57590	WD repeat and FYVE domain containing 1	520.211	0.108229	0.143396	0.129555	0.346856
	EGLN2	112398	egl-9 family hypoxia inducible factor 2	1712.39	0.118708	0.118946	0.129735	0.347028
	CENPT	80152	centromere protein T	234.516	-0.118874	0.116624	0.129769	0.347028
	ARNTL	406	aryl hydrocarbon receptor nuclear translocator like	336.38	0.118753	0.114264	0.13023	0.347254
	AP2M1	1173	adaptor related protein complex 2 subunit mu 1	2325.99	0.11316	0.135286	0.130148	0.347254
	TNFSF10	8743	TNF superfamily member 10	1787.09	0.1077	0.143821	0.130211	0.347254
	CCDC115	84317	coiled-coil domain containing 115	254.612	-0.116215	0.101161	0.130095	0.347254
	RPAP2	79871	RNA polymerase II associated protein 2	279.742	-0.116625	0.102403	0.130179	0.347254
	ARHGEF11	9826	Rho guanine nucleotide exchange factor 11	722.718	0.117276	0.125273	0.130323	0.347301
	PRDM1	639	PR/SET domain 1	404.801	0.113374	0.134608	0.130596	0.34763
	CD3G	917	CD3g molecule	429.86	-0.112399	0.136415	0.130544	0.34763
	FHL3	2275	four and a half LIM domains 3	354.81	-0.11046	0.13941	0.130925	0.348304
	ABI3	51225	ABI family member 3	451.22	-0.117737	0.122121	0.131248	0.348963
	CBLB	868	Cbl proto-oncogene B	218.643	-0.118038	0.120121	0.131367	0.349079
	TRAK2	66008	trafficking kinesin protein 2	511.858	0.0811622	0.176156	0.131518	0.349278
	RAB5B	5869	RAB5B, member RAS oncogene family	1466.23	0.116598	0.103784	0.131702	0.349365
	GDE1	51573	glycerophosphodiester phosphodiesterase 1	757.948	0.115961	0.127989	0.131688	0.349365
	P2RX1	5023	purinergic receptor P2X 1	687.677	0.110385	0.139052	0.131831	0.349508
	WWP2	11060	WW domain containing E3 ubiquitin protein ligase 2	1126.15	0.118078	0.114596	0.132389	0.350426
	KHDC4	22889	KH domain containing 4, pre-mRNA splicing factor	324.02	-0.110554	0.0909426	0.132405	0.350426
	CD226	10666	CD226 molecule	261.314	-0.116821	0.124577	0.132328	0.350426
	KHNYN	23351	KH and NYN domain containing	1145.68	0.117963	0.115521	0.13275	0.350771
	CTSS	1520	cathepsin S	15564.6	0.117789	0.111931	0.132917	0.350771
	NUB1	51667	negative regulator of ubiquitin like proteins 1	987.226	0.117662	0.118576	0.133147	0.350771
	CFP	5199	complement factor properdin	2995.69	0.117648	0.11849	0.133219	0.350771
	ZFAND2B	130617	zinc finger AN1-type containing 2B	312.425	0.117373	0.121065	0.132998	0.350771
	BRMS1	25855	BRMS1 transcriptional repressor and anoikis regulator	352.349	0.116122	0.103598	0.133084	0.350771
	MED15	51586	mediator complex subunit 15	577.642	0.107551	0.0864354	0.13267	0.350771
	AHSA2P	130872	activator of HSP90 ATPase homolog 2, pseudogene	636.86	-0.11653	0.104956	0.133015	0.350771
	WBP11	51729	WW domain binding protein 11	450.923	-0.117592	0.110189	0.132953	0.350771
	CCND2	894	cyclin D2	593.783	-0.117199	0.121444	0.133341	0.350892
	ANKS1A	23294	ankyrin repeat and sterile alpha motif domain containing 1A	274.372	0.116616	0.123677	0.133693	0.35162
	UBE2W	55284	ubiquitin conjugating enzyme E2 W	465.889	0.10563	0.14499	0.133788	0.351669
	KCNE3	10008	potassium voltage-gated channel subfamily E regulatory subunit 3	996.455	0.116124	0.125256	0.133927	0.351835
	SLC43A2	124935	solute carrier family 43 member 2	2551.59	0.117111	0.119774	0.134454	0.352589
	LIMD2	80774	LIM domain containing 2	3908.86	0.116371	0.105946	0.134371	0.352589
	MIA2	4253	MIA SH3 domain ER export factor 2	284.865	0.115919	0.104466	0.134596	0.352589
	PRKAG1	5571	protein kinase AMP-activated non-catalytic subunit gamma 1	275.809	0.115885	0.104196	0.134455	0.352589
	UBL5	59286	ubiquitin like 5	344.806	0.102027	0.149302	0.134542	0.352589
	NUP58	9818	nucleoporin 58	412.63	0.116682	0.121378	0.135023	0.353509
	S100A4	6275	S100 calcium binding protein A4	4761.52	0.117155	0.114516	0.135358	0.354184
	YIF1B	90522	Yip1 interacting factor homolog B, membrane trafficking protein	216.737	0.116829	0.111055	0.135771	0.354663
	RP2	6102	RP2 activator of ARL3 GTPase	506.967	0.111121	0.135686	0.135706	0.354663
	PRPF38B	55119	pre-mRNA processing factor 38B	645.144	-0.110241	0.0920314	0.135753	0.354663
	CAP1	10487	cyclase associated actin cytoskeleton regulatory protein 1	8550.11	0.116937	0.114125	0.136051	0.355193
	FMNL1	752	formin like 1	6688.88	0.116013	0.122769	0.136278	0.355376
	OSCAR	126014	osteoclast associated Ig-like receptor	981.292	0.112485	0.132761	0.136225	0.355376
	PANK2	80025	pantothenate kinase 2	540.355	0.112014	0.0959609	0.136813	0.355376
	UBL7	84993	ubiquitin like 7	506.756	0.109661	0.137775	0.136458	0.355376
	FCGR3A	2214	Fc fragment of IgG receptor IIIa	6724.05	0.105788	0.143554	0.136491	0.355376
	ST6GALNAC2	10610	ST6 N-acetylgalactosaminide alpha-2,6-sialyltransferase 2	421.481	0.10451	0.145184	0.136718	0.355376
	KATNBL1	79768	katanin regulatory subunit B1 like 1	320.622	0.103304	0.146746	0.136761	0.355376
	CCNJL	79616	cyclin J like	260.248	0.0864466	0.166996	0.136632	0.355376
	ZC3H7A	29066	zinc finger CCCH-type containing 7A	307.713	-0.111381	0.0946405	0.13673	0.355376
	RIN3	79890	Ras and Rab interactor 3	1597.16	0.11433	0.127726	0.137108	0.355744
	MKRN1	23608	makorin ring finger protein 1	4904.74	0.0881787	0.164698	0.137109	0.355744
	FOXK1	221937	forkhead box K1	375.551	-0.115692	0.106713	0.137217	0.355824
	PILRA	29992	paired immunoglobin like type 2 receptor alpha	2055.52	0.115681	0.12271	0.137391	0.356075
	RBM23	55147	RNA binding motif protein 23	1343.53	0.114457	0.126789	0.137732	0.356691
	IQGAP1	8826	IQ motif containing GTPase activating protein 1	1364.08	0.100649	0.14966	0.137782	0.356691
	RTN3	10313	reticulon 3	3998.65	0.112786	0.130921	0.137979	0.356998
	NPEPPS	9520	aminopeptidase puromycin sensitive	1182.53	0.116109	0.115749	0.138758	0.358201
	B4GALT1	2683	beta-1,4-galactosyltransferase 1	1259.08	0.115858	0.110611	0.138831	0.358201
	HIVEP2	3097	human immunodeficiency virus type I enhancer binding protein 2	361.46	0.115791	0.119571	0.138818	0.358201
	PLXDC2	84898	plexin domain containing 2	853.599	0.111908	0.132322	0.138728	0.358201
	HNRNPH1	3187	heterogeneous nuclear ribonucleoprotein H1	2135.4	-0.116079	0.112782	0.138708	0.358201
	BIN3	55909	bridging integrator 3	214.567	0.100135	0.149816	0.13895	0.358309
	KDM5A	5927	lysine demethylase 5A	791.493	0.115912	0.112522	0.139214	0.35859
	IRF9	10379	interferon regulatory factor 9	1932.02	0.114421	0.125453	0.139199	0.35859
	SLCO3A1	28232	solute carrier organic anion transporter family member 3A1	369.276	0.113845	0.126734	0.13977	0.359751
	MYO18A	399687	myosin XVIIIA	719.167	-0.112725	0.0995442	0.139821	0.359751
	DAD1	1603	defender against cell death 1	423.439	0.110134	0.09402	0.140015	0.36005
	HEBP2	23593	heme binding protein 2	479.702	0.108363	0.137983	0.140141	0.360093
	BAG5	9529	BCL2 associated athanogene 5	235.738	-0.0887271	0.0669269	0.140263	0.360093
	RFC1	5981	replication factor C subunit 1	243.561	-0.111863	0.131392	0.140266	0.360093
	GON4L	54856	gon-4 like	448.731	0.111313	0.0966485	0.140426	0.360305
	ADGRE5	976	adhesion G protein-coupled receptor E5	7113.14	0.109821	0.135165	0.140733	0.360893
	TBC1D25	4943	TBC1 domain family member 25	292.584	0.111924	0.130833	0.140879	0.361067
	ING1	3621	inhibitor of growth family member 1	218.21	0.11524	0.118369	0.1411	0.361396
	ZBTB17	7709	zinc finger and BTB domain containing 17	268.395	0.114203	0.10539	0.141227	0.361396
	PDK3	5165	pyruvate dehydrogenase kinase 3	668.98	0.110714	0.133166	0.141242	0.361396
	ASAH1	427	N-acylsphingosine amidohydrolase 1	2650.58	0.11502	0.118899	0.141643	0.361618
	TBXAS1	6916	thromboxane A synthase 1	1773.66	0.113968	0.124007	0.141993	0.361618
	MACROH2A1			2266.67	0.111942	0.0988305	0.141565	0.361618
	MAN2B2	23324	mannosidase alpha class 2B member 2	801.648	0.108576	0.0919634	0.141605	0.361618
	LDB1	8861	LIM domain binding 1	646.52	0.102613	0.0830167	0.141903	0.361618
	UBXN7	26043	UBX domain protein 7	459.655	-0.110137	0.0950129	0.141825	0.361618
	NEMF	9147	nuclear export mediator factor	225.243	-0.112569	0.128483	0.141917	0.361618
	NOLC1	9221	nucleolar and coiled-body phosphoprotein 1	291.158	-0.11432	0.106416	0.141656	0.361618
	DCLRE1C	64421	DNA cross-link repair 1C	245.589	-0.114685	0.108932	0.142034	0.361618
	SRSF9	8683	serine and arginine rich splicing factor 9	886.477	0.0984329	0.0778622	0.142266	0.362011
	ARAP3	64411	ArfGAP with RhoGAP domain, ankyrin repeat and PH domain 3	856.559	0.111787	0.130019	0.142474	0.362341
	TK2	7084	thymidine kinase 2	245.971	0.110839	0.132031	0.142638	0.362558
	OR2W3	343171	olfactory receptor family 2 subfamily W member 3	267.39	0.0669236	0.190829	0.143037	0.363372
	CLK3	1198	CDC like kinase 3	899.776	0.114681	0.117398	0.143257	0.363731
	ARHGAP25	9938	Rho GTPase activating protein 25	3042.43	0.114486	0.116893	0.144033	0.365299
	ASB6	140459	ankyrin repeat and SOCS box containing 6	265.528	0.108136	0.0923219	0.143961	0.365299
	PPP2R5D	5528	protein phosphatase 2 regulatory subunit B'delta	242.761	-0.110838	0.0981542	0.144502	0.366289
	IPMK	253430	inositol polyphosphate multikinase	309.817	0.108376	0.135585	0.144678	0.366533
	RASSF2	9770	Ras association domain family member 2	6075.4	0.112421	0.126373	0.144868	0.366814
	EXOC3	11336	exocyst complex component 3	739.313	0.110031	0.0966143	0.144974	0.36688
	VPS26A	9559	VPS26, retromer complex component A	275.341	0.113006	0.105322	0.145339	0.367602
	KMT2E	55904	lysine methyltransferase 2E	982.754	-0.107689	0.0923366	0.14565	0.368189
	UNC13D	201294	unc-13 homolog D	2225.42	0.11259	0.124698	0.145994	0.368654
	AP1G2	8906	adaptor related protein complex 1 subunit gamma 2	728.503	0.108174	0.0933906	0.145961	0.368654
	AP000347.1			454.067	0.11379	0.111436	0.146171	0.368699
	GAB3	139716	GRB2 associated binding protein 3	428.736	0.107291	0.0918421	0.146112	0.368699
	SCYL2	55681	SCY1 like pseudokinase 2	407.858	0.11349	0.120047	0.146305	0.368815
	SH2B2	10603	SH2B adaptor protein 2	371.024	0.104825	0.140475	0.146377	0.368815
	TOP1	7150	DNA topoisomerase I	1008.94	0.112849	0.123024	0.146561	0.369077
	SLC25A45	283130	solute carrier family 25 member 45	223.752	-0.109324	0.132608	0.14674	0.369327
	MBD4	8930	methyl-CpG binding domain 4, DNA glycosylase	402.429	0.113013	0.109253	0.148016	0.371325
	UNKL	64718	unk like zinc finger	376.167	0.106259	0.137508	0.147954	0.371325
	CD44	960	CD44 molecule (Indian blood group)	651.838	0.103767	0.141352	0.147884	0.371325
	MTARC1			278.507	0.102687	0.142956	0.147693	0.371325
	YOD1	55432	YOD1 deubiquitinase	333.82	0.0817671	0.167978	0.148	0.371325
	ELK3	2004	ETS transcription factor ELK3	264.674	-0.110869	0.100554	0.147791	0.371325
	UBL4A	8266	ubiquitin like 4A	242.953	0.112858	0.108843	0.14835	0.37185
	ERF	2077	ETS2 repressor factor	462.145	0.109063	0.132044	0.148539	0.37185
	HERC5	51191	HECT and RLD domain containing E3 ubiquitin protein ligase 5	422.489	-0.0832078	0.16602	0.148547	0.37185
	SYMPK	8189	symplekin	307.046	-0.113207	0.116857	0.148437	0.37185
	LMO2	4005	LIM domain only 2	587.409	0.113143	0.113598	0.14886	0.372231
	LDHB	3945	lactate dehydrogenase B	862.145	-0.105483	0.138358	0.148786	0.372231
	RRP1B	23076	ribosomal RNA processing 1B	213.063	-0.113109	0.114524	0.149027	0.372446
	FOXN3	1112	forkhead box N3	764.113	-0.104891	0.0891742	0.14929	0.372903
	BORCS8	729991	BLOC-1 related complex subunit 8	354.78	0.109912	0.12944	0.149576	0.373098
	RRAGD	58528	Ras related GTP binding D	227.731	0.105168	0.138456	0.149638	0.373098
	IMP3	55272	IMP U3 small nucleolar ribonucleoprotein 3	236.597	-0.108274	0.0955351	0.1496	0.373098
	ARID4A	5926	AT-rich interaction domain 4A	571.788	-0.111143	0.125936	0.149691	0.373098
	STX16	8675	syntaxin 16	1475.3	0.11228	0.108045	0.149945	0.373466
	HCLS1	3059	hematopoietic cell-specific Lyn substrate 1	7306.11	0.111581	0.124108	0.150001	0.373466
	RAPGEF1	2889	Rap guanine nucleotide exchange factor 1	1397.85	-0.110891	0.102543	0.150143	0.373618
	TPGS2	25941	tubulin polyglutamylase complex subunit 2	662.781	0.0793125	0.170094	0.150282	0.373765
	SDHD	6392	succinate dehydrogenase complex subunit D	456.823	0.106737	0.0929117	0.150417	0.373898
	SYNJ1	8867	synaptojanin 1	257.416	0.112296	0.109611	0.15074	0.374377
	PDLIM7	9260	PDZ and LIM domain 7	1512.84	0.105632	0.137165	0.150772	0.374377
	MCM3	4172	minichromosome maintenance complex component 3	244.307	-0.112241	0.119378	0.150959	0.37464
	DCP1A	55802	decapping mRNA 1A	269.017	-0.102057	0.0855564	0.151234	0.375122
	SKIV2L	6499	Ski2 like RNA helicase	469.667	0.112414	0.113457	0.151422	0.375222
	ATF7	11016	activating transcription factor 7	284.051	0.108031	0.0961511	0.151599	0.375222
	MED16	10025	mediator complex subunit 16	622.642	0.101471	0.143028	0.151563	0.375222
	MPRIP	23164	myosin phosphatase Rho interacting protein	690.779	-0.111001	0.124614	0.151543	0.375222
	NBPF15	284565	NBPF member 15	250.527	-0.105392	0.137101	0.151723	0.375328
	AGER	177	advanced glycosylation end-product specific receptor	254.598	0.111142	0.123764	0.151838	0.375411
	VPS37B	79720	VPS37B subunit of ESCRT-I	759.375	0.111793	0.119885	0.152289	0.376123
	NCKAP1L	3071	NCK associated protein 1 like	820.703	0.110989	0.123902	0.152251	0.376123
	EXOSC10	5394	exosome component 10	304.537	-0.112068	0.11443	0.152714	0.376971
	DENND5A	23258	DENN domain containing 5A	1906.74	0.110535	0.124327	0.153453	0.378595
	CD48	962	CD48 molecule	1162.5	0.110963	0.122252	0.153716	0.379001
	RNF11	26994	ring finger protein 11	908.674	0.0819403	0.165543	0.153782	0.379001
	PHOSPHO1	162466	phosphoethanolamine/phosphocholine phosphatase	4362.96	0.0845449	0.162447	0.153878	0.379025
	NFATC1	4772	nuclear factor of activated T cells 1	236.829	-0.11172	0.11483	0.153956	0.379025
	RPS6KA5	9252	ribosomal protein S6 kinase A5	405.058	-0.108868	0.128558	0.154428	0.379985
	RPLP1	6176	ribosomal protein lateral stalk subunit P1	1169.53	0.111476	0.116969	0.154534	0.380042
	SIRPB2	284759	signal regulatory protein beta 2	1320.5	0.107835	0.13076	0.154835	0.38058
	RNF169	254225	ring finger protein 169	436.542	0.110698	0.107007	0.154996	0.380775
	SH3BP5L	80851	SH3 binding domain protein 5 like	820.489	0.109716	0.125503	0.155161	0.380976
	TBC1D3L	101060376	TBC1 domain family member 3L	217.495	0.0824122	0.16437	0.155455	0.381496
	PAF1	54623	PAF1 homolog, Paf1/RNA polymerase II complex component	409.198	0.110906	0.109173	0.155565	0.381565
	SURF6	6838	surfeit 6	238.575	-0.109186	0.126647	0.155745	0.381802
	CCDC124	115098	coiled-coil domain containing 124	278.322	0.101631	0.141034	0.155876	0.381921
	SURF4	6836	surfeit 4	909.892	0.0907581	0.0727064	0.156032	0.382101
	PDIA3	2923	protein disulfide isomerase family A member 3	1219.7	0.110447	0.108494	0.156889	0.383797
	KDM5C	8242	lysine demethylase 5C	939.929	0.108579	0.101081	0.156974	0.383797
	MFN2	9927	mitofusin 2	1157.74	0.103405	0.137889	0.156934	0.383797
	PDAP1	11333	PDGFA associated protein 1	521.229	0.110389	0.119826	0.157345	0.384501
	RPS12	6206	ribosomal protein S12	4037.53	0.102052	0.139735	0.157493	0.384658
	ACSL5	51703	acyl-CoA synthetase long chain family member 5	440.89	0.110706	0.113738	0.157622	0.38477
	ZNF213	7760	zinc finger protein 213	233.663	0.108593	0.126387	0.158181	0.385932
	RBM14	10432	RNA binding motif protein 14	364.906	-0.109063	0.103931	0.158429	0.386128
	RSL1D1	26156	ribosomal L1 domain containing 1	526.05	-0.110271	0.118466	0.158416	0.386128
	MTPN	136319	myotrophin	2331.26	0.109757	0.107435	0.158793	0.386813
	ZNF33A	7581	zinc finger protein 33A	616.265	-0.10988	0.120053	0.159073	0.38729
	THUMPD1	55623	THUMP domain containing 1	267.322	-0.105562	0.0950995	0.159225	0.387455
	PCNX1	22990	pecanex 1	1291.78	0.103011	0.137417	0.159371	0.387606
	PRAM1	84106	PML-RARA regulated adaptor molecule 1	1338.97	0.108067	0.12683	0.159548	0.387833
	UTRN	7402	utrophin	685.658	-0.105713	0.132285	0.159865	0.388399
	NIBAN3	199786	niban apoptosis regulator 3	310.898	-0.0919368	0.151843	0.159983	0.388483
	MINDY1	55793	MINDY lysine 48 deubiquitinase 1	858.3	0.108774	0.12369	0.160391	0.388861
	TANGO2	128989	transport and golgi organization 2 homolog	870.885	0.10004	0.141508	0.160299	0.388861
	GVINP1	387751	GTPase, very large interferon inducible pseudogene 1	301.903	-0.109326	0.121242	0.160358	0.388861
	RPS11	6205	ribosomal protein S11	4449.35	0.109286	0.107822	0.160821	0.389698
	ARL4C	10123	ADP ribosylation factor like GTPase 4C	1039.8	-0.105638	0.131694	0.161164	0.390325
	ZFYVE1	53349	zinc finger FYVE-type containing 1	270.871	0.108583	0.123391	0.161368	0.390467
	SUMF2	25870	sulfatase modifying factor 2	420.512	-0.109664	0.112846	0.161392	0.390467
	MARCHF8			2455.99	0.0800328	0.164875	0.16192	0.391293
	PTPN11	5781	protein tyrosine phosphatase non-receptor type 11	339.186	-0.0992302	0.0852408	0.161988	0.391293
	ATXN7L3B	552889	ataxin 7 like 3B	503.076	-0.102399	0.0903479	0.161971	0.391293
	ATP2B4	493	ATPase plasma membrane Ca2+ transporting 4	870.087	0.109258	0.110661	0.16236	0.391327
	RAC1	5879	Rac family small GTPase 1	2118.18	0.108862	0.108361	0.162764	0.391327
	APH1A	51107	aph-1 homolog A, gamma-secretase subunit	1036.48	0.0988971	0.084938	0.162537	0.391327
	IMPA2	3613	inositol monophosphatase 2	611.757	0.0981237	0.143236	0.16267	0.391327
	HSF1	3297	heat shock transcription factor 1	476.606	0.0966193	0.0817387	0.162666	0.391327
	GASK1B	51313	golgi associated kinase 1B	311.397	0.0903148	0.152938	0.162335	0.391327
	TXLNA	200081	taxilin alpha	359.368	-0.10458	0.0946291	0.162234	0.391327
	SEPTIN9	10801	septin 9	3584.21	-0.108536	0.122005	0.162718	0.391327
	ST6GAL1	6480	ST6 beta-galactoside alpha-2,6-sialyltransferase 1	916.956	-0.10909	0.118858	0.162606	0.391327
	PTPA	5524	protein phosphatase 2 phosphatase activator	583.554	0.109297	0.114974	0.162857	0.391348
	CYFIP2	26999	cytoplasmic FMR1 interacting protein 2	1905.68	0.109203	0.114604	0.163229	0.392037
	MGAM	8972	maltase-glucoamylase	2918.83	0.0951227	0.146809	0.163516	0.392409
	ZFP36L2	678	ZFP36 ring finger protein like 2	3125.07	-0.107883	0.104549	0.163553	0.392409
	MAP4	4134	microtubule associated protein 4	261.749	-0.108515	0.119936	0.164198	0.393751
	INKA2	55924	inka box actin regulator 2	1631.96	0.103266	0.134605	0.164396	0.394022
	SSRP1	6749	structure specific recognition protein 1	406.017	-0.108847	0.113877	0.164569	0.394231
	KDELR2	11014	KDEL endoplasmic reticulum protein retention receptor 2	373.781	0.108741	0.112012	0.164724	0.394399
	TTC38	55020	tetratricopeptide repeat domain 38	300.941	-0.106614	0.126821	0.164909	0.394637
	NFKBIB	4793	NFKB inhibitor beta	270.117	0.108565	0.110911	0.165085	0.39465
	GDI1	2664	GDP dissociation inhibitor 1	1306.9	0.106281	0.100428	0.165008	0.39465
	PCIF1	63935	PDX1 C-terminal inhibiting factor 1	533.569	0.108529	0.110837	0.165197	0.394712
	STARD7	56910	StAR related lipid transfer domain containing 7	640.105	-0.104693	0.096539	0.165282	0.394712
	AP3M1	26985	adaptor related protein complex 3 subunit mu 1	382.198	-0.0980457	0.0847423	0.165617	0.395308
	SELENOO	83642	selenoprotein O	313.779	0.108469	0.112345	0.165834	0.395623
	TADA2B	93624	transcriptional adaptor 2B	561.248	0.107589	0.106304	0.166241	0.396277
	GALC	2581	galactosylceramidase	355.835	0.105716	0.128285	0.16628	0.396277
	C9orf78	51759	chromosome 9 open reading frame 78	3397.51	0.0715689	0.173638	0.166568	0.396554
	RBBP7	5931	RB binding protein 7, chromatin remodeling factor	348.964	-0.107884	0.108377	0.166535	0.396554
	VCAN	1462	versican	2759.24	0.10307	0.133831	0.166672	0.396598
	RNPEPL1	57140	arginyl aminopeptidase like 1	1349.01	0.106607	0.10301	0.166936	0.397021
	LENG8	114823	leukocyte receptor cluster member 8	2936.21	0.107972	0.110865	0.167354	0.397267
	AP1M1	8907	adaptor related protein complex 1 subunit mu 1	900.031	0.107774	0.109032	0.167329	0.397267
	VPS8	23355	VPS8 subunit of CORVET complex	513.836	0.107364	0.121666	0.167383	0.397267
	NUP214	8021	nucleoporin 214	586.395	0.0992894	0.139834	0.167227	0.397267
	USP36	57602	ubiquitin specific peptidase 36	247.763	-0.103539	0.132399	0.167668	0.397535
	SKI	6497	SKI proto-oncogene	678.583	-0.107101	0.122643	0.167582	0.397535
	CMTM3	123920	CKLF like MARVEL transmembrane domain containing 3	630.439	0.107975	0.113867	0.167908	0.397695
	GALNT3	2591	polypeptide N-acetylgalactosaminyltransferase 3	238.523	0.0979947	0.14147	0.167823	0.397695
	C6orf47	57827	chromosome 6 open reading frame 47	309.52	0.107396	0.12025	0.168249	0.398055
	MAP3K11	4296	mitogen-activated protein kinase kinase kinase 11	2110.6	0.106799	0.123104	0.168318	0.398055
	RECQL	5965	RecQ like helicase	238.946	-0.106632	0.104245	0.168147	0.398055
	DCTN5	84516	dynactin subunit 5	408.639	0.107396	0.119597	0.168635	0.398349
	VRK3	51231	VRK serine/threonine kinase 3	539.175	0.107136	0.107252	0.168724	0.398349
	PTAFR	5724	platelet activating factor receptor	3833.7	0.105937	0.125967	0.168532	0.398349
	TNFRSF10B	8795	TNF receptor superfamily member 10b	878.696	0.105032	0.0995754	0.168788	0.398349
	ZNF770	54989	zinc finger protein 770	236.86	-0.104744	0.0988748	0.1689	0.398411
	TMBIM1	64114	transmembrane BAX inhibitor motif containing 1	1637.99	0.107452	0.11072	0.169324	0.398925
	REXO1	57455	RNA exonuclease 1 homolog	412.561	0.104632	0.0988885	0.169377	0.398925
	PIP4K2A	5305	phosphatidylinositol-5-phosphate 4-kinase type 2 alpha	2312.64	0.0854307	0.156275	0.16928	0.398925
	SH2B3	10019	SH2B adaptor protein 3	1011.58	-0.0993692	0.0883154	0.169689	0.399456
	TNRC6C	57690	trinucleotide repeat containing adaptor 6C	219.238	-0.102222	0.133805	0.169919	0.399794
	RIPOR2	9750	RHO family interacting cell polarization regulator 2	8074.88	0.103249	0.131705	0.170041	0.399822
	ZBTB4	57659	zinc finger and BTB domain containing 4	427.215	-0.103785	0.130505	0.170104	0.399822
	BIRC2	329	baculoviral IAP repeat containing 2	398.433	0.0953191	0.144211	0.170249	0.399961
	DNAJB11	51726	DnaJ heat shock protein family (Hsp40) member B11	246.886	0.106958	0.108866	0.170434	0.40019
	MAPKAPK2	9261	MAPK activated protein kinase 2	1341.11	0.10527	0.126408	0.170526	0.400203
	SPRYD3	84926	SPRY domain containing 3	465.899	0.107202	0.114593	0.170903	0.400885
	TGFBR1	7046	transforming growth factor beta receptor 1	664.701	0.10556	0.124808	0.171333	0.40169
	C18orf32	497661	chromosome 18 open reading frame 32	287.628	0.102574	0.132345	0.171431	0.401714
	NFKB1	4790	nuclear factor kappa B subunit 1	721.756	0.105683	0.103966	0.171648	0.401989
	WBP1L	54838	WW domain binding protein 1 like	821.098	0.105509	0.103376	0.171722	0.401989
	RENBP	5973	renin binding protein	254.478	0.104437	0.127624	0.172094	0.402655
	FNBP1	23048	formin binding protein 1	1570.96	-0.0971592	0.0858283	0.172597	0.403424
	RASAL3	64926	RAS protein activator like 3	293.012	-0.103797	0.128953	0.172587	0.403424
	IL1RAP	3556	interleukin 1 receptor accessory protein	621.277	0.0893547	0.150612	0.173041	0.404053
	YLPM1	56252	YLP motif containing 1	276.447	-0.106329	0.108958	0.172975	0.404053
	EIF4H	7458	eukaryotic translation initiation factor 4H	1744.17	0.103361	0.098005	0.173189	0.404194
	RGP1	9827	RGP1 homolog, RAB6A GEF complex partner 1	265.754	0.103192	0.0976977	0.173383	0.404444
	HARS1			289.93	-0.100404	0.0917827	0.173593	0.404525
	CLSTN1	22883	calsyntenin 1	465.37	-0.105176	0.124168	0.17352	0.404525
	SLC10A3	8273	solute carrier family 10 member 3	239.39	0.106131	0.109996	0.174262	0.405401
	MCMBP	79892	minichromosome maintenance complex binding protein	684.094	0.104956	0.103611	0.174215	0.405401
	NCF1B	654816	neutrophil cytosolic factor 1B pseudogene	2103.65	0.104512	0.125585	0.174495	0.405401
	CLEC7A	64581	C-type lectin domain containing 7A	2809.7	0.102512	0.130925	0.174278	0.405401
	CPSF6	11052	cleavage and polyadenylation specific factor 6	351.198	-0.0995461	0.0905236	0.174378	0.405401
	PLAGL2	5326	PLAG1 like zinc finger 2	425.211	-0.102351	0.0962786	0.174436	0.405401
	CYTH2	9266	cytohesin 2	560.385	0.106062	0.116283	0.175154	0.406728
	ATG4D	84971	autophagy related 4D cysteine peptidase	246.193	0.104206	0.125712	0.175539	0.407051
	PTAR1	375743	protein prenyltransferase alpha subunit repeat containing 1	367.777	0.102012	0.131296	0.175558	0.407051
	TRANK1	9881	tetratricopeptide repeat and ankyrin repeat containing 1	2044.46	0.101179	0.133032	0.175486	0.407051
	KCTD12	115207	potassium channel tetramerization domain containing 12	1286.15	0.105383	0.120163	0.176143	0.407185
	REC8	9985	REC8 meiotic recombination protein	217.945	0.103133	0.128347	0.17611	0.407185
	ST13	6767	ST13 Hsp70 interacting protein	1343.9	0.0906035	0.148244	0.175875	0.407185
	CYBRD1	79901	cytochrome b reductase 1	328.621	0.0888761	0.150223	0.176099	0.407185
	PNP	4860	purine nucleoside phosphorylase	543.408	0.0824716	0.157531	0.176057	0.407185
[truncated: 12,379 more rows]
