# Supplementary material for: Whole blood transcriptomics reveals the enrichment of neutrophil activation pathways during erythema nodosum leprosum reaction
Source: Front Immunol. 2024 Apr 23;15:1366125. doi: 10.3389/fimmu.2024.1366125 (PMC11074352; doi:10.3389/fimmu.2024.1366125)
Supplement: Supplementary file 7 [file Table_6.xls]

## Sheet: Table S6
Supplementary table 6 - Diferentially expressed genes in pair-wise RNAseq analysis of THALxENL. Statistically differentially expressed genes are highlighted in yellow (parameters: |log2FC| ≥ 0.585 (FC ≥ 1.5) and padj ≤ 0.1 ). The genes are arranged in descending order of padj. Log2FC- Log2FoldChange; lfcSE - log2FC Standard error; padj - Adjusted p value.
	SYMBOL	ENTREZID	GENENAME	baseMean	log2FoldChange	lfcSE	pvalue	padj
	HAPLN3	145864	hyaluronan and proteoglycan link protein 3	128.72	-1.64471	0.230095	6.74934e-14	9.20677e-10
	RNASE2	6036	ribonuclease A family member 2	230.109	1.03137	0.16694	1.17267e-10	7.99818e-07
	IGFBP2	3485	insulin like growth factor binding protein 2	126.984	2.01532	0.365957	6.01609e-10	2.73552e-06
	RNA5SP389	106480766	RNA, 5S ribosomal pseudogene 389	672.961	-1.35247	0.232393	9.17315e-10	3.12827e-06
	KCNH3	23416	potassium voltage-gated channel subfamily H member 3	54.4073	-1.95284	0.365976	1.90401e-09	5.19452e-06
	CAMP	820	cathelicidin antimicrobial peptide	385.403	1.59881	0.292811	3.47467e-09	7.89965e-06
	CLC	1178	Charcot-Leyden crystal galectin	342.249	1.14152	0.20517	4.1658e-09	8.11795e-06
	KIAA0319L	79932	KIAA0319 like	905.157	0.70247	0.160755	4.11863e-08	7.02278e-05
	ATP2C2	9914	ATPase secretory pathway Ca2+ transporting 2	38.8799	2.08611	0.473589	6.20545e-08	9.40539e-05
	CELSR2	1952	cadherin EGF LAG seven-pass G-type receptor 2	14.7656	-2.37228	0.941362	2.18825e-07	0.000298499
	ZNF692	55657	zinc finger protein 692	171.606	0.855694	0.204601	2.98565e-07	0.000370248
	CHIT1	1118	chitinase 1	86.4766	1.62529	0.392691	5.23037e-07	0.000594562
	TMEM92	162461	transmembrane protein 92	19.4363	2.06879	0.619237	5.95851e-07	0.000625231
	CD33	945	CD33 molecule	408.909	0.475305	0.130023	7.04891e-07	0.000686815
	SLC2A5	6518	solute carrier family 2 member 5	66.9823	1.4791	0.363169	8.24029e-07	0.000708569
	MPZL1	9019	myelin protein zero like 1	602.841	-0.642403	0.183068	8.31105e-07	0.000708569
	CLEC5A	23601	C-type lectin domain containing 5A	146.269	1.26885	0.310489	1.00818e-06	0.000808975
	MRAS	22808	muscle RAS oncogene homolog	32.7048	-1.63821	0.467377	1.75459e-06	0.00132969
	ALOX15	246	arachidonate 15-lipoxygenase	121.305	1.5784	0.449904	2.00749e-06	0.00144128
	CRISP3	10321	cysteine rich secretory protein 3	113.443	1.33339	0.360646	2.17864e-06	0.00148594
	PI3	5266	peptidase inhibitor 3	1399.68	0.935558	0.285735	4.39416e-06	0.00285432
	CAT	847	catalase	1349.72	0.379134	0.118662	6.41554e-06	0.00380497
	TK2	7084	thymidine kinase 2	196.105	-0.865908	0.284099	6.18065e-06	0.00380497
	RETN	56729	resistin	139.352	0.980665	0.330409	8.46977e-06	0.00462145
	MARVELD1	83742	MARVEL domain containing 1	114.808	0.820796	0.285616	8.20316e-06	0.00462145
	MYH10	4628	myosin heavy chain 10	86.5712	-1.48323	0.588164	9.28677e-06	0.00487234
	CHD7	55636	chromodomain helicase DNA binding protein 7	403.46	0.410612	0.141253	9.74022e-06	0.00492098
	ZNF608	57507	zinc finger protein 608	42.6587	-1.26658	0.460248	1.06692e-05	0.00519781
	ALDH2	217	aldehyde dehydrogenase 2 family member	906.25	0.652163	0.254215	1.23418e-05	0.00580533
	IL5RA	3568	interleukin 5 receptor subunit alpha	70.9701	1.07955	0.401453	1.38479e-05	0.0060935
	MARK4	57787	microtubule affinity regulating kinase 4	237.331	-0.525196	0.207988	1.38088e-05	0.0060935
	SOAT1	6646	sterol O-acyltransferase 1	364.745	-0.454443	0.174034	1.44181e-05	0.00614617
	LILRA3	11026	leukocyte immunoglobulin like receptor A3	872.577	0.657004	0.265095	1.52483e-05	0.00630311
	GIMAP1	170575	GTPase, IMAP family member 1	571.502	-0.543565	0.221542	1.5956e-05	0.00640166
	DUSP13	51207	dual specificity phosphatase 13	18.5227	1.34346	0.605557	1.79228e-05	0.00691973
	PNKD	25953	PNKD metallo-beta-lactamase domain containing	226.434	0.439263	0.173608	1.87691e-05	0.00691973
	SPCS1	28972	signal peptidase complex subunit 1	142.938	-1.2465	0.530484	1.87628e-05	0.00691973
	NACC2	138151	NACC family member 2	609.6	-0.310496	0.107697	2.0324e-05	0.00729578
	ELAPOR1			748.394	0.587848	0.257055	2.30877e-05	0.00807535
	VASH1	22846	vasohibin 1	153.733	-0.724864	0.318419	2.55974e-05	0.00872934
	CYP1B1	1545	cytochrome P450 family 1 subfamily B member 1	249.661	-0.741794	0.328475	2.69663e-05	0.00897189
	FMO5	2330	flavin containing monooxygenase 5	22.6821	-1.03173	0.457969	2.80296e-05	0.00910362
	CDT1	81620	chromatin licensing and DNA replication factor 1	35.5943	0.931382	0.413007	2.91843e-05	0.00925821
	FHL3	2275	four and a half LIM domains 3	285.688	0.543184	0.258249	3.61461e-05	0.0112061
	FPR3	2359	formyl peptide receptor 3	13.8694	1.1561	0.608162	3.78769e-05	0.0113628
	C11orf95	65998	chromosome 11 open reading frame 95	19.7813	-1.18961	0.655044	3.83176e-05	0.0113628
	MYO5A	4644	myosin VA	262.66	0.699614	0.340695	4.04132e-05	0.0117293
	LTF	4057	lactotransferrin	1935.67	1.15089	0.718019	5.01004e-05	0.0142379
	MYBPH	4608	myosin binding protein H	31.938	1.15132	0.845263	5.14302e-05	0.0143175
	NLRP6	171389	NLR family pyrin domain containing 6	218.388	-0.655857	0.360667	6.61302e-05	0.0176879
	PEG10	23089	paternally expressed 10	22.9723	-1.07041	0.702396	6.6022e-05	0.0176879
	LGALS12	85329	galectin 12	67.7658	0.675614	0.379772	7.18764e-05	0.0185596
	SUSD3	203328	sushi domain containing 3	109.319	0.504184	0.278595	7.3471e-05	0.0185596
	SLC46A2	57864	solute carrier family 46 member 2	68.1094	-0.635788	0.358231	7.27849e-05	0.0185596
	DUSP23	54935	dual specificity phosphatase 23	98.2166	0.583274	0.334152	7.87399e-05	0.0195289
	SLC8A1	6546	solute carrier family 8 member A1	216.948	-0.605167	0.352161	8.29215e-05	0.0201988
	OTULINL	54491	OTU deubiquitinase with linear linkage specificity like	263.863	0.354745	0.175433	8.8568e-05	0.0204772
	CHST2	9435	carbohydrate sulfotransferase 2	331.825	-0.351149	0.172425	8.84517e-05	0.0204772
	RNA5SP202	100873463	RNA, 5S ribosomal pseudogene 202	264.223	-0.806747	0.487102	8.73121e-05	0.0204772
	PRRG4	79056	proline rich and Gla domain 4	341.939	-0.56007	0.33179	9.07144e-05	0.0206239
	LCN2	3934	lipocalin 2	697.022	0.912935	0.603202	9.53472e-05	0.0209779
	ENAH	55740	ENAH actin regulator	213.415	-0.90377	0.588256	9.39944e-05	0.0209779
	CLEC10A	10462	C-type lectin domain containing 10A	92.6844	0.661528	0.405694	9.86075e-05	0.0213509
	CHI3L1	1116	chitinase 3 like 1	2705.22	0.919278	0.848778	0.000108741	0.0223215
	RNASE3	6037	ribonuclease A family member 3	56.9531	0.860011	0.582174	0.000109636	0.0223215
	TCN1	6947	transcobalamin 1	165.394	0.777842	0.500539	0.000107292	0.0223215
	TDRD9	122402	tudor domain containing 9	49.7164	-0.742422	0.474268	0.000108068	0.0223215
	CXCL8	3576	C-X-C motif chemokine ligand 8	33.1706	0.881991	0.63047	0.0001165	0.0231158
	MIA2	4253	MIA SH3 domain ER export factor 2	254.774	-0.332035	0.169391	0.000116926	0.0231158
	SLC9A3R1	9368	SLC9A3 regulator 1	30.9384	0.881503	0.717133	0.000134427	0.026196
	ABCA13	154664	ATP binding cassette subfamily A member 13	49.1219	0.832385	0.633941	0.000142877	0.0274505
	DEFA3	1668	defensin alpha 3	3954.87	0.839476	0.660815	0.000146869	0.0278256
	NBPF26	101060684	NBPF member 26	362.191	-0.418875	0.269059	0.000155931	0.0291378
	DBNDD2	55861	dysbindin domain containing 2	53.4861	0.541511	0.375011	0.000159266	0.0293587
	B4GALNT3	283358	beta-1,4-N-acetyl-galactosaminyltransferase 3	24.4817	0.816062	0.701616	0.000169144	0.0307638
	VSIG4	11326	V-set and immunoglobulin domain containing 4	41.9644	0.793158	0.718157	0.000185615	0.0311526
	OLFM4	10562	olfactomedin 4	331.221	0.779419	0.687142	0.000191799	0.0311526
	ORM1	5004	orosomucoid 1	148.575	0.555244	0.404954	0.00018519	0.0311526
	GYS1	2997	glycogen synthase 1	236.182	0.334484	0.200127	0.000191835	0.0311526
	CD163	9332	CD163 molecule	378.685	0.317422	0.178773	0.000181357	0.0311526
	EFTUD2	9343	elongation factor Tu GTP binding domain containing 2	447.532	0.273413	0.138657	0.000179015	0.0311526
	C6orf62	81688	chromosome 6 open reading frame 62	1257.97	-0.203806	0.0971044	0.000187877	0.0311526
	KATNBL1	79768	katanin regulatory subunit B1 like 1	276.237	-0.357956	0.221458	0.000182425	0.0311526
	SPATA13	221178	spermatogenesis associated 13	125.139	-0.483116	0.344666	0.000188232	0.0311526
	ARHGAP23	57636	Rho GTPase activating protein 23	12.9897	-0.751359	0.667422	0.000209267	0.0335836
	RFXANK	8625	regulatory factor X associated ankyrin containing protein	285.783	0.277974	0.152568	0.000230046	0.036489
	SPG21	51324	SPG21 abhydrolase domain containing, maspardin	871.549	0.26224	0.139505	0.000233446	0.0366027
	HFE	3077	homeostatic iron regulator	71.758	0.468485	0.357745	0.000237401	0.0367999
	CLEC2B	9976	C-type lectin domain family 2 member B	115.432	-0.349084	0.235147	0.000244388	0.0374572
	CEBPE	1053	CCAAT enhancer binding protein epsilon	72.5446	0.52485	0.431352	0.000270508	0.040876
	C4BPA	722	complement component 4 binding protein alpha	89.9544	-0.615141	0.534084	0.000272687	0.040876
	TTLL4	9654	tubulin tyrosine ligase like 4	238.217	0.408482	0.325628	0.000305633	0.0453167
	PRKDC	5591	protein kinase, DNA-activated, catalytic subunit	775.464	0.351442	0.260386	0.000310417	0.0455312
	PVR	5817	PVR cell adhesion molecule	86.5237	0.474669	0.405818	0.000323267	0.0469115
	ADGRE4P	326342	adhesion G protein-coupled receptor E4, pseudogene	67.904	0.534543	0.477441	0.00032974	0.0473472
	CEACAM6	4680	carcinoembryonic antigen related cell adhesion molecule 6	102.996	0.633453	0.669791	0.000333955	0.0474529
	MMP8	4317	matrix metallopeptidase 8	358.81	0.562361	0.526753	0.000348774	0.0490477
	PPFIA4	8497	PTPRF interacting protein alpha 4	18.4138	0.608153	0.684766	0.000367551	0.0505076
	POLR2J3	548644	RNA polymerase II subunit J3	726.999	0.246752	0.143947	0.000365354	0.0505076
	TLR9	54106	toll like receptor 9	70.4636	-0.381866	0.317671	0.000370263	0.0505076
	SLFN13	146857	schlafen family member 13	105.017	0.369908	0.304188	0.000374504	0.0505803
	COA1	55744	cytochrome c oxidase assembly factor 1 homolog	123.191	0.325468	0.25081	0.000392412	0.0524794
	NPIPB5	100132247	nuclear pore complex interacting protein family member B5	1255.17	0.26671	0.171077	0.00040083	0.0530847
	OLR1	4973	oxidized low density lipoprotein receptor 1	30.1668	0.578725	0.671017	0.000412995	0.0541699
	SERPINB10	5273	serpin family B member 10	22.9715	0.56707	0.643754	0.000433182	0.0552822
	DAAM2	23500	dishevelled associated activator of morphogenesis 2	169.938	0.464328	0.441943	0.000430426	0.0552822
	HERPUD1	9709	homocysteine inducible ER protein with ubiquitin like domain 1	673.636	0.214901	0.122853	0.000437686	0.0552822
	TMSB4XP4	7118	TMSB4X pseudogene 4	329.838	-0.270992	0.182738	0.000435334	0.0552822
	RAB44	401258	RAB44, member RAS oncogene family	89.834	0.45447	0.436807	0.000448542	0.0561335
	STON2	85439	stonin 2	31.8028	0.525387	0.54697	0.000454003	0.0563005
	PTPN7	5778	protein tyrosine phosphatase non-receptor type 7	384.301	0.252145	0.161772	0.000459841	0.0565108
	HOMER3	9454	homer scaffold protein 3	133.498	-0.292157	0.220056	0.000465127	0.0566499
	CTSW	1521	cathepsin W	688.187	0.259802	0.173451	0.000471959	0.0569734
	BPI	671	bactericidal permeability increasing protein	335.5	0.453765	0.449197	0.00048021	0.0570722
	ATG9A	79065	autophagy related 9A	450.428	0.237867	0.148193	0.000485329	0.0570722
	ABHD3	171586	abhydrolase domain containing 3	367.395	-0.255595	0.16959	0.000484115	0.0570722
	TMEM120B	144404	transmembrane protein 120B	145.417	0.435037	0.431549	0.000501183	0.0574508
	EIF4A1	1973	eukaryotic translation initiation factor 4A1	441.024	0.319613	0.269304	0.000496174	0.0574508
	SERPINB9	5272	serpin family B member 9	561.753	0.221507	0.133082	0.00050035	0.0574508
	VSTM1	284415	V-set and transmembrane domain containing 1	102.776	0.273887	0.201381	0.000513005	0.0583158
	CTSG	1511	cathepsin G	71.307	0.51239	0.66737	0.000528871	0.0596225
	ADAM15	8751	ADAM metallopeptidase domain 15	305.417	0.284146	0.225434	0.000550365	0.0615371
	KYAT1	883	kynurenine aminotransferase 1	46.2851	0.403313	0.409529	0.000566691	0.0623406
	LYZ	4069	lysozyme	30626.1	0.223347	0.140026	0.00056632	0.0623406
	CLDN12	9069	claudin 12	11.8684	0.492101	0.653519	0.000579559	0.0630364
	DNMT3B	1789	DNA methyltransferase 3 beta	125.899	-0.446927	0.483905	0.00058445	0.0630364
	BICDL2	146439	BICD family like cargo adaptor 2	18.1323	-0.491539	0.590987	0.00058688	0.0630364
	BBX	56987	BBX high mobility group box domain containing	101.758	0.287776	0.642912	0.000602789	0.0642394
	VSIG10	54621	V-set and immunoglobulin domain containing 10	8.41417	0.46075	0.663358	0.000630312	0.0666518
	NOD2	64127	nucleotide binding oligomerization domain containing 2	544.173	0.223079	0.145728	0.000641155	0.0667633
	GJA1	2697	gap junction protein alpha 1	99.6791	-0.445801	0.507096	0.000636992	0.0667633
	ERICH1	157697	glutamate rich 1	396.407	-0.251211	0.191327	0.000678277	0.0700937
	AL441992.2			21.1872	0.448219	0.63317	0.000700301	0.0718256
	SLC39A11	201266	solute carrier family 39 member 11	111.542	0.231265	0.165491	0.000736352	0.0748667
	ABCA2	20	ATP binding cassette subfamily A member 2	441.287	-0.277949	0.251876	0.000740928	0.0748667
	MTPN	136319	myotrophin	1881.46	-0.166089	0.0998926	0.000819056	0.0821525
	HHEX	3087	hematopoietically expressed homeobox	76.1596	-0.369241	0.433896	0.000831883	0.08283
	SLC29A1	2030	solute carrier family 29 member 1 (Augustine blood group)	107.8	0.333678	0.375313	0.000856455	0.0846587
	GPX3	2878	glutathione peroxidase 3	49.6065	0.402203	0.585504	0.000892427	0.0863375
	NEU3	10825	neuraminidase 3	121.238	0.250908	0.223488	0.000889745	0.0863375
	LAMA5	3911	laminin subunit alpha 5	45.6686	-0.398904	0.600396	0.000888631	0.0863375
	SIGLEC8	27181	sialic acid binding Ig like lectin 8	35.0888	0.400364	0.560137	0.000906374	0.0867253
	DEFA4	1669	defensin alpha 4	191.931	0.389165	0.51302	0.000918472	0.0867253
	TMEM91	641649	transmembrane protein 91	463.899	0.248946	0.224297	0.000921866	0.0867253
	CBX6	23466	chromobox 6	540.873	-0.173886	0.109331	0.000909463	0.0867253
	LIPA	3988	lipase A, lysosomal acid type	32.0532	0.391355	0.586782	0.000934151	0.0872791
	NINJ2	4815	ninjurin 2	171.079	0.244747	0.225597	0.000991147	0.0907399
	NKG7	4818	natural killer cell granule protein 7	366.433	0.220802	0.173185	0.000988198	0.0907399
	TET2	54790	tet methylcytosine dioxygenase 2	712.699	-0.227064	0.184912	0.000980416	0.0907399
	LIPN	643418	lipase family member N	22.5502	-0.362663	0.483377	0.00102607	0.0933109
	RFLNB	359845	refilin B	1497.73	0.244577	0.233985	0.00104946	0.0941817
	GSDMB	55876	gasdermin B	228.195	0.23114	0.201707	0.00104293	0.0941817
	LEPROT	54741	leptin receptor overlapping transcript	418.574	0.185738	0.126522	0.00106552	0.094998
	AC104389.5			101.968	0.227991	0.198681	0.00107597	0.0953069
	KCTD20	222658	potassium channel tetramerization domain containing 20	610.433	0.188736	0.131658	0.00110629	0.0968348
	ZNF316	100131017	zinc finger protein 316	624.467	-0.23862	0.228446	0.00110741	0.0968348
	ARHGEF40	55701	Rho guanine nucleotide exchange factor 40	679.628	-0.254177	0.268381	0.00113042	0.0982169
	ZNF419	79744	zinc finger protein 419	34.4395	0.331632	0.442682	0.0011542	0.0988251
	NPM1	4869	nucleophosmin 1	823.2	0.216591	0.18198	0.00115915	0.0988251
	BHLHE40	8553	basic helix-loop-helix family member e40	412.193	0.200765	0.150565	0.00114987	0.0988251
	MAP3K15	389840	mitogen-activated protein kinase kinase kinase 15	11.6681	0.328603	0.581871	0.00117935	0.0999226
	FRAS1	80144	Fraser extracellular matrix complex subunit 1	44.5564	-0.315171	0.576895	0.00124121	0.104515
	CORO1B	57175	coronin 1B	513.987	0.213175	0.183643	0.00125102	0.104694
	PXDN	7837	peroxidasin	18.4006	-0.315291	0.569996	0.00127736	0.106247
	COPS3	8533	COP9 signalosome subunit 3	58.6431	0.289277	0.386491	0.00136799	0.113096
	CISH	1154	cytokine inducible SH2 containing protein	361.85	0.196935	0.158756	0.00138401	0.113731
	CD24	100133941	CD24 molecule	496.141	0.270562	0.346318	0.00139438	0.113897
	CCNF	899	cyclin F	15.6007	0.264421	0.560148	0.00140924	0.114425
	LDLRAD4	753	low density lipoprotein receptor class A domain containing 4	100.938	0.247618	0.305072	0.00149165	0.117147
	AC097637.1			21.6101	0.24511	0.550215	0.00146203	0.117147
	MMP9	4318	matrix metallopeptidase 9	2824.44	0.221893	0.237103	0.00149429	0.117147
	GFOD1	54438	glucose-fructose oxidoreductase domain containing 1	137.594	0.210426	0.201752	0.00147999	0.117147
	ABHD6	57406	abhydrolase domain containing 6	33.8489	-0.24984	0.305393	0.00145428	0.117147
	GCH1	2643	GTP cyclohydrolase 1	189.854	-0.286315	0.401204	0.00148394	0.117147
	TMEM168	64418	transmembrane protein 168	17.9884	0.302384	0.501749	0.00155278	0.120349
	TPST1	8460	tyrosylprotein sulfotransferase 1	123.323	0.240355	0.294223	0.00154812	0.120349
	CDCP1	64866	CUB domain containing protein 1	34.9463	0.299041	0.481669	0.00158207	0.121926
	OR52K3P	390035	olfactory receptor family 52 subfamily K member 3 pseudogene	177.009	0.209598	0.21538	0.00161586	0.123172
	VDAC2	7417	voltage dependent anion channel 2	45.8514	-0.293107	0.460162	0.00161629	0.123172
	PGLYRP1	8993	peptidoglycan recognition protein 1	489.034	0.223518	0.260172	0.00163904	0.123571
	SCARF1	8578	scavenger receptor class F member 1	844.617	0.222949	0.258614	0.00163964	0.123571
	RBBP5	5929	RB binding protein 5, histone lysine methyltransferase complex subunit	158.346	0.28472	0.439549	0.00166764	0.124307
	CDIPT	10423	CDP-diacylglycerol--inositol 3-phosphatidyltransferase	121.037	0.256767	0.353376	0.00166657	0.124307
	STEAP3	55240	STEAP3 metalloreductase	46.7742	0.25785	0.357968	0.0016777	0.124378
	HSPA1B	3304	heat shock protein family A (Hsp70) member 1B	411.491	-0.195767	0.181179	0.00170121	0.125439
	WNT5B	81029	Wnt family member 5B	10.0915	0.285539	0.493472	0.00172145	0.125776
	RILPL1	353116	Rab interacting lysosomal protein like 1	59.2747	0.221083	0.263669	0.00172422	0.125776
	ZNF366	167465	zinc finger protein 366	26.7118	0.265623	0.402314	0.00180308	0.130136
	FRAT1	10023	FRAT regulator of WNT signaling pathway 1	998.888	-0.18108	0.150655	0.00180297	0.130136
	DLEU7	220107	deleted in lymphocytic leukemia 7	28.7269	0.272594	0.432901	0.00181885	0.130584
	SPNS2	124976	sphingolipid transporter 2	23.8919	0.27604	0.459618	0.00183111	0.130776
	DGKH	160851	diacylglycerol kinase eta	165.618	0.206746	0.234773	0.00185574	0.131844
	RRM2	6241	ribonucleotide reductase regulatory subunit M2	38.3981	0.255345	0.506534	0.00193757	0.135946
	MARCHF5			189.793	-0.187652	0.176058	0.0019253	0.135946
	MEX3A	92312	mex-3 RNA binding family member A	13.2545	-0.238431	0.513391	0.00194337	0.135946
	CCDC69	26112	coiled-coil domain containing 69	1218.98	-0.173007	0.142214	0.00197802	0.137664
	PRSS33	260429	serine protease 33	67.1899	0.249225	0.397722	0.00207875	0.143407
	RNF122	79845	ring finger protein 122	135.352	-0.178974	0.161334	0.00208157	0.143407
	HOPX	84525	HOP homeobox	53.7049	0.253997	0.43393	0.00212119	0.144676
	APBA2	321	amyloid beta precursor protein binding family A member 2	161.563	0.192127	0.212133	0.00211791	0.144676
	CCDC71L	168455	coiled-coil domain containing 71 like	263.324	-0.214211	0.293477	0.00215845	0.146485
	HP	3240	haptoglobin	319.721	0.208535	0.282387	0.00222435	0.149997
	BAX	581	BCL2 associated X, apoptosis regulator	115.737	0.19985	0.25795	0.00227249	0.149997
	TMEM121B	27439	transmembrane protein 121B	237.443	0.184017	0.196588	0.00227916	0.149997
	SRGAP2C	653464	SLIT-ROBO Rho GTPase activating protein 2C	145.406	0.176015	0.163218	0.00224614	0.149997
	GART	2618	phosphoribosylglycinamide formyltransferase, phosphoribosylglycinamide synthetase, phosphoribosylaminoimidazole synthetase	224.149	0.17304	0.157115	0.00229263	0.149997
	NFKB2	4791	nuclear factor kappa B subunit 2	658.405	-0.158271	0.126168	0.00229818	0.149997
	L1TD1	54596	LINE1 type transposase domain containing 1	273.23	-0.18048	0.178345	0.00223985	0.149997
	SOX11	6664	SRY-box 11	18.8416	-0.183505	0.480253	0.0022564	0.149997
	AZU1	566	azurocidin 1	167.872	0.23783	0.424137	0.00240097	0.15596
	POLR2J2	246721	RNA polymerase II subunit J2	75.1804	0.184948	0.217467	0.0024359	0.157479
	ELANE	1991	elastase, neutrophil expressed	159.443	0.232085	0.408062	0.00248386	0.159072
	CLIP1	6249	CAP-Gly domain containing linker protein 1	537.992	-0.155356	0.125704	0.00248034	0.159072
	UROD	7389	uroporphyrinogen decarboxylase	205.639	0.163368	0.142022	0.00250581	0.159728
	SURF4	6836	surfeit 4	739.043	-0.128331	0.0893774	0.00254698	0.160108
	TSC22D3	1831	TSC22 domain family member 3	4435.17	-0.155574	0.127513	0.00254053	0.160108
	FCGR2C	9103	Fc fragment of IgG receptor IIc (gene/pseudogene)	237.636	-0.17961	0.20439	0.00253751	0.160108
	SHROOM3	57619	shroom family member 3	11.2656	-0.159354	0.453423	0.00256531	0.16052
	SPAG7	9552	sperm associated antigen 7	135.911	0.168641	0.160572	0.00258334	0.160673
	NBPF14	25832	NBPF member 14	885.109	-0.161473	0.140751	0.00259131	0.160673
	NAPSB	256236	napsin B aspartic peptidase, pseudogene	305.729	-0.160229	0.1399	0.00264907	0.163511
	FOSL2	2355	FOS like 2, AP-1 transcription factor subunit	1599.55	-0.167208	0.161129	0.00267288	0.164238
	C10orf105	414152	chromosome 10 open reading frame 105	116.109	-0.174757	0.197361	0.00269302	0.164733
	TRIM35	23087	tripartite motif containing 35	122.44	0.163866	0.15237	0.00271726	0.165007
	BCL2L11	10018	BCL2 like 11	391.963	-0.155654	0.132298	0.00272169	0.165007
	ZDHHC19	131540	zinc finger DHHC-type containing 19	33.8557	-0.200844	0.461751	0.00277108	0.167258
	AC068831.6			12.8806	0.215987	0.416542	0.00286712	0.168352
	FOXP3	50943	forkhead box P3	41.5586	0.195923	0.305117	0.00286831	0.168352
	AC092053.1			116.718	0.19592	0.305859	0.0028756	0.168352
	SMYD2	56950	SET and MYND domain containing 2	69.9816	0.192046	0.286143	0.00282906	0.168352
	CCDC88A	55704	coiled-coil domain containing 88A	348.644	0.162651	0.155006	0.00284412	0.168352
	SLC16A5	9121	solute carrier family 16 member 5	204.853	0.148899	0.123176	0.00287393	0.168352
	CD300E	342510	CD300e molecule	851.486	-0.17342	0.209435	0.00287148	0.168352
	ZNF600	162966	zinc finger protein 600	75.9933	0.17885	0.243626	0.00295072	0.17128
	FOS	2353	Fos proto-oncogene, AP-1 transcription factor subunit	705.126	-0.149406	0.125489	0.00293964	0.17128
	RP2	6102	RP2 activator of ARL3 GTPase	407.286	-0.15218	0.132638	0.00300476	0.173678
	PRSS36	146547	serine protease 36	15.5936	0.199416	0.343768	0.00308082	0.177322
	ABAT	18	4-aminobutyrate aminotransferase	37.243	0.189977	0.308396	0.0031358	0.177645
	MSL2	55167	MSL complex subunit 2	502.496	-0.141136	0.114388	0.00311802	0.177645
	SPRYD3	84926	SPRY domain containing 3	383.893	-0.1412	0.11478	0.00313599	0.177645
	RBPMS	11030	RNA binding protein, mRNA processing factor	20.5627	-0.184961	0.44534	0.00313851	0.177645
	BTBD11	121551	BTB domain containing 11	34.6653	0.198342	0.410003	0.00331224	0.18004
	LAG3	3902	lymphocyte activating 3	55.7972	0.1774	0.273271	0.00333518	0.18004
	TNFRSF9	3604	TNF receptor superfamily member 9	117.244	0.176865	0.26173	0.00323553	0.18004
	ADGRG5	221188	adhesion G protein-coupled receptor G5	133.435	0.171816	0.24436	0.00330193	0.18004
	MAN2C1	4123	mannosidase alpha class 2C member 1	273.004	0.165355	0.202218	0.00322935	0.18004
	GRN	2896	granulin precursor	5203.53	0.152008	0.141723	0.00331562	0.18004
	CLEC4E	26253	C-type lectin domain family 4 member E	733.175	0.149185	0.13413	0.00331496	0.18004
	MAP3K1	4214	mitogen-activated protein kinase kinase kinase 1	819.613	-0.149559	0.134528	0.00329631	0.18004
	MPP7	143098	membrane palmitoylated protein 7	134.862	-0.157251	0.162235	0.00332329	0.18004
	ZMYM6	9204	zinc finger MYM-type containing 6	129.987	-0.17164	0.246977	0.00333921	0.18004
	HSP90AB1	3326	heat shock protein 90 alpha family class B member 1	31.0542	-0.172649	0.437443	0.00333764	0.18004
	INHBB	3625	inhibin subunit beta B	16.3187	-0.199285	0.383176	0.00329561	0.18004
	PAQR4	124222	progestin and adipoQ receptor family member 4	50.7148	0.192252	0.355202	0.00342785	0.182477
	LRRC27	80313	leucine rich repeat containing 27	49.9674	0.174526	0.266058	0.00339927	0.182477
	PLOD1	5351	procollagen-lysine,2-oxoglutarate 5-dioxygenase 1	459.566	0.154835	0.158096	0.00343791	0.182477
	SDSL	113675	serine dehydratase like	15.8371	-0.19419	0.372198	0.00343588	0.182477
	CDON	50937	cell adhesion associated, oncogene regulated	7.60252	-0.147641	0.423856	0.00346632	0.183272
	WDFY4	57705	WDFY family member 4	160.03	0.165039	0.234868	0.00357275	0.187861
	CDKN1B	1027	cyclin dependent kinase inhibitor 1B	942.306	-0.147485	0.137361	0.00358066	0.187861
	DONSON	29980	downstream neighbor of SON	14.4576	-0.189055	0.390174	0.00363139	0.189792
	NUAK2	81788	NUAK family kinase 2	771.805	-0.14549	0.135067	0.00369331	0.191224
	ZBTB22	9278	zinc finger and BTB domain containing 22	139.017	-0.151685	0.159344	0.00370083	0.191224
	FCGR2B	2213	Fc fragment of IgG receptor IIb	380.569	-0.155986	0.187506	0.00368023	0.191224
	NPIPA5	100288332	nuclear pore complex interacting protein family member A5	9.36892	0.11749	0.391525	0.0037381	0.191697
	RNF146	81847	ring finger protein 146	289.563	-0.149139	0.148521	0.00372637	0.191697
	CCNG2	901	cyclin G2	164.196	-0.150361	0.15721	0.00377745	0.192269
	ST14	6768	suppression of tumorigenicity 14	121.883	-0.159763	0.222828	0.00376651	0.192269
	GABRG2	2566	gamma-aminobutyric acid type A receptor gamma2 subunit	105.93	0.146693	0.143976	0.00384387	0.194923
	CSGALNACT2	55454	chondroitin sulfate N-acetylgalactosaminyltransferase 2	475.633	-0.14741	0.150265	0.00391531	0.19781
	KLF13	51621	Kruppel like factor 13	1935.7	-0.143525	0.13654	0.00394106	0.198377
	PTGDR2	11251	prostaglandin D2 receptor 2	113.344	0.167813	0.284632	0.0039728	0.199239
	RPL32	6161	ribosomal protein L32	1431.97	0.120427	0.0923238	0.00399551	0.199644
	ABCC4	10257	ATP binding cassette subfamily C member 4	61.5073	0.159477	0.244753	0.00402446	0.200357
	TTN	7273	titin	128.184	-0.177607	0.368366	0.00406349	0.201564
	MAPK8	5599	mitogen-activated protein kinase 8	126.898	-0.148152	0.170473	0.00411834	0.203544
	CDC42EP2	10435	CDC42 effector protein 2	381.332	0.148518	0.181916	0.00418806	0.205501
	PARP11	57097	poly(ADP-ribose) polymerase family member 11	92.8671	-0.152024	0.21075	0.00417365	0.205501
	DCK	1633	deoxycytidine kinase	71.8288	-0.152957	0.22243	0.00422413	0.206528
	HERC2	8924	HECT and RLD domain containing E3 ubiquitin protein ligase 2	163.574	0.150234	0.204052	0.00424399	0.206758
	XPO7	23039	exportin 7	37.0419	0.171434	0.382668	0.00426053	0.206825
	TNNT1	7138	troponin T1, slow skeletal type	38.9851	-0.171959	0.353273	0.00429257	0.207642
	CEACAM19	56971	carcinoembryonic antigen related cell adhesion molecule 19	20.6964	0.171561	0.356835	0.00431808	0.208137
	CLSTN3	9746	calsyntenin 3	113.252	0.145604	0.180889	0.00442172	0.212383
	CR1	1378	complement C3b/C4b receptor 1 (Knops blood group)	1291.98	-0.149172	0.21739	0.00445565	0.213262
	CTPS2	56474	CTP synthase 2	28.4138	0.151599	0.247843	0.00461345	0.220042
	HSPA6	3310	heat shock protein family A (Hsp70) member 6	1574.72	-0.138706	0.142583	0.0046363	0.220362
	P2RY6	5031	pyrimidinergic receptor P2Y6	11.2545	0.159909	0.382229	0.00466125	0.220778
	FGL2	10875	fibrinogen like 2	4517.46	0.121796	0.101447	0.00474747	0.223311
	ITGA3	3675	integrin subunit alpha 3	45.395	-0.162533	0.339511	0.00474074	0.223311
	GTF2F1	2962	general transcription factor IIF subunit 1	42.2882	0.158776	0.376044	0.00478126	0.224128
	BCL2L15	440603	BCL2 like 15	102.732	0.157704	0.304432	0.00481547	0.224205
	UEVLD	55293	UEV and lactate/malate dehyrogenase domains	115.055	0.138193	0.148617	0.00481578	0.224205
	SLC27A3	11000	solute carrier family 27 member 3	285.13	0.136147	0.13915	0.004852	0.225123
	OTUD1	220213	OTU deubiquitinase 1	187.722	-0.135931	0.139988	0.0049006	0.226607
	CNR2	1269	cannabinoid receptor 2	129.43	0.13816	0.164823	0.00500308	0.230564
	CPNE2	221184	copine 2	91.7863	0.148156	0.260038	0.0050318	0.230897
	CXCR3	2833	C-X-C motif chemokine receptor 3	71.7486	0.141547	0.212428	0.00504611	0.230897
	PRPF39	55015	pre-mRNA processing factor 39	45.1351	-0.15181	0.287016	0.00506107	0.230897
	RPL36	25873	ribosomal protein L36	958.808	0.114755	0.0926217	0.00515603	0.234445
	TXNIP	10628	thioredoxin interacting protein	19901	-0.102334	0.0727041	0.0052184	0.236493
	STMN1	3925	stathmin 1	164.931	0.135729	0.168519	0.00528729	0.238212
	HSH2D	84941	hematopoietic SH2 domain containing	1287.18	0.132743	0.139286	0.00529127	0.238212
	TMEM45A	55076	transmembrane protein 45A	209.338	0.137282	0.20299	0.00536199	0.239029
	INPPL1	3636	inositol polyphosphate phosphatase like 1	661.554	-0.13436	0.156343	0.00535454	0.239029
	RNA5SP149	106480437	RNA, 5S ribosomal pseudogene 149	230.872	-0.148301	0.288215	0.00534633	0.239029
	ENTPD2	954	ectonucleoside triphosphate diphosphohydrolase 2	13.3304	0.13902	0.373806	0.005428	0.241183
	NOTCH2	4853	notch receptor 2	1504.57	-0.129265	0.12953	0.0054735	0.242416
	ERAL1	26284	Era like 12S mitochondrial rRNA chaperone 1	11.9183	0.137766	0.372552	0.00549346	0.242512
	SPON2	10417	spondin 2	132.282	0.133513	0.172288	0.00555291	0.244286
	KCTD11	147040	potassium channel tetramerization domain containing 11	47.6327	-0.134587	0.196859	0.0055868	0.244286
	METRNL	284207	meteorin like, glial cell differentiation regulator	248.855	-0.135198	0.204579	0.00558738	0.244286
	TMEM140	55281	transmembrane protein 140	1116.71	-0.130782	0.148695	0.00572171	0.24936
	DMWD	1762	DM1 locus, WD repeat containing	100.221	-0.13126	0.161869	0.00576546	0.250467
	IER5	51278	immediate early response 5	318.45	-0.13124	0.16647	0.0057899	0.250651
	F5	2153	coagulation factor V	361.436	-0.141437	0.276489	0.00580645	0.250651
	STRN	6801	striatin	318.857	-0.110528	0.0901426	0.00583849	0.251239
	CNTNAP3B	728577	contactin associated protein like 3B	178.238	-0.135354	0.232464	0.00586715	0.251678
	CTNNA1	1495	catenin alpha 1	77.7967	0.141389	0.313355	0.00608815	0.257855
	ITGA5	3678	integrin subunit alpha 5	1462.42	0.125698	0.13262	0.00614873	0.257855
	ABCA7	10347	ATP binding cassette subfamily A member 7	1717.84	-0.117932	0.107602	0.00613501	0.257855
	RIC1	57589	RIC1 homolog, RAB6A GEF complex partner 1	210.585	-0.123186	0.120861	0.00607231	0.257855
	MAP3K5	4217	mitogen-activated protein kinase kinase kinase 5	531.911	-0.123428	0.12245	0.00611634	0.257855
	USP38	84640	ubiquitin specific peptidase 38	202.189	-0.124528	0.125684	0.00608079	0.257855
	MICAL1	64780	microtubule associated monooxygenase, calponin and LIM domain containing 1	1179.81	-0.127066	0.143946	0.00618125	0.257855
	REM2	161253	RRAD and GEM like GTPase 2	167.306	-0.128295	0.156305	0.00611685	0.257855
	MRM2	29960	mitochondrial rRNA methyltransferase 2	47.1272	-0.136886	0.347336	0.00617528	0.257855
	YARS1			344.886	0.123547	0.125568	0.0062496	0.259911
	TREX1	11277	three prime repair exonuclease 1	174.873	0.121281	0.118207	0.00627385	0.260126
	KIF20A	10112	kinesin family member 20A	14.342	0.136426	0.322543	0.00647811	0.267781
	RELB	5971	RELB proto-oncogene, NF-kB subunit	384.81	-0.12534	0.150483	0.00650075	0.267905
	TIFAB	497189	TIFA inhibitor	16.295	0.135181	0.314485	0.00660397	0.27134
	H2AX			115.532	0.122945	0.166026	0.00688405	0.280052
	GZMA	3001	granzyme A	200.526	0.122765	0.156976	0.00690685	0.280052
	CREG1	8804	cellular repressor of E1A stimulated genes 1	782.806	0.119706	0.124209	0.00691866	0.280052
	IL15	3600	interleukin 15	46.66	-0.124264	0.203688	0.0068587	0.280052
	SLC15A2	6565	solute carrier family 15 member 2	63.8396	-0.125074	0.214508	0.00685405	0.280052
	MGAT4B	11282	alpha-1,3-mannosyl-glycoprotein 4-beta-N-acetylglucosaminyltransferase B	89.6197	-0.124447	0.215106	0.00694167	0.280152
	SIGLEC12	89858	sialic acid binding Ig like lectin 12 (gene/pseudogene)	8.00776	0.10721	0.345	0.00696846	0.280377
	MAN1A1	4121	mannosidase alpha class 1A member 1	548.551	-0.121001	0.13343	0.00698835	0.280377
	ACSL3	2181	acyl-CoA synthetase long chain family member 3	206.531	-0.12182	0.150688	0.00704335	0.281755
	NECTIN1	5818	nectin cell adhesion molecule 1	129.839	0.121392	0.178459	0.00711945	0.283451
	KAT6A	7994	lysine acetyltransferase 6A	838.107	-0.117005	0.117523	0.0071273	0.283451
	COL5A3	50509	collagen type V alpha 3 chain	22.7907	0.12819	0.280538	0.00719308	0.285235
	SIGLEC22P	114195	sialic acid binding Ig like lectin 22, pseudogene	10.3237	0.127501	0.285482	0.00730117	0.287848
	TRIM65	201292	tripartite motif containing 65	119.383	-0.120248	0.155821	0.0072992	0.287848
	ATP6V0A1	535	ATPase H+ transporting V0 subunit a1	310.482	0.118522	0.129395	0.00735467	0.289121
	TPM2	7169	tropomyosin 2	55.6013	0.120857	0.213155	0.00741127	0.290509
	SPN	6693	sialophorin	1106.13	0.11847	0.171938	0.00755566	0.290693
	ORM2	5005	orosomucoid 2	13.6552	0.116813	0.335299	0.00752127	0.290693
	XPNPEP1	7511	X-prolyl aminopeptidase 1	203.04	0.116226	0.121594	0.00753351	0.290693
	COL4A3	1285	collagen type IV alpha 3 chain	6.59447	-0.0992771	0.334662	0.00753491	0.290693
	KLF2	10365	Kruppel like factor 2	3522.9	-0.101529	0.0836641	0.00756514	0.290693
	FOXO1	2308	forkhead box O1	244.408	-0.116446	0.121833	0.00749615	0.290693
	TMTC1	83857	transmembrane and tetratricopeptide repeat containing 1	54.0327	-0.123013	0.246352	0.00749296	0.290693
	ARRB1	408	arrestin beta 1	876.249	0.117444	0.13134	0.00762606	0.292211
	SLC11A2	4891	solute carrier family 11 member 2	132.52	0.11636	0.127492	0.00774528	0.294774
	RPL38	6169	ribosomal protein L38	1307.58	0.101051	0.0836105	0.00773137	0.294774
	VNN1	8876	vanin 1	277.947	-0.11895	0.219916	0.00775778	0.294774
	FAM95C	100289137	family with sequence similarity 95 member C	17.251	0.12231	0.288371	0.00790703	0.29532
	TUB	7275	TUB bipartite transcription factor	6.71101	-0.0826899	0.316994	0.00780743	0.29532
	YAP1	10413	Yes associated protein 1	15.1408	-0.104814	0.333507	0.00784847	0.29532
	MVP	9961	major vault protein	595.237	-0.116239	0.132592	0.00790135	0.29532
	SLC22A4	6583	solute carrier family 22 member 4	245.284	-0.116455	0.171216	0.00788065	0.29532
	IL1B	3553	interleukin 1 beta	489.083	-0.118381	0.221987	0.00786507	0.29532
	TRIM71	131405	tripartite motif containing 71	58.7735	-0.122121	0.284612	0.0079237	0.29532
	RESF1	55196	retroelement silencing factor 1	2635.53	-0.115132	0.126229	0.0079736	0.29637
	CYP27A1	1593	cytochrome P450 family 27 subfamily A member 1	566.335	0.117222	0.219709	0.00801656	0.297157
	NAPSA	9476	napsin A aspartic peptidase	6.99389	0.118436	0.314433	0.00808259	0.297389
	ATP8B4	79895	ATPase phospholipid transporting 8B4 (putative)	77.9457	0.115862	0.209859	0.00813181	0.297389
	ORAI1	84876	ORAI calcium release-activated calcium modulator 1	382.757	0.112913	0.117843	0.00811904	0.297389
	PPTC7	160760	PTC7 protein phosphatase homolog	447.327	-0.104931	0.0939701	0.0080678	0.297389
	KIF6	221458	kinesin family member 6	24.518	-0.115375	0.322065	0.0081161	0.297389
	ZNF208	7757	zinc finger protein 208	24.4615	-0.0831224	0.3155	0.00816625	0.29785
	TOX2	84969	TOX high mobility group box family member 2	10.8256	0.118212	0.275668	0.00839718	0.299138
	EEF2K	29904	eukaryotic elongation factor 2 kinase	94.1916	0.116977	0.305823	0.00838157	0.299138
	LMNA	4000	lamin A/C	154.858	0.114235	0.148297	0.00837877	0.299138
	TTC16	158248	tetratricopeptide repeat domain 16	98.299	0.114132	0.154907	0.00835986	0.299138
	NFATC3	4775	nuclear factor of activated T cells 3	632.481	0.11287	0.125123	0.00846175	0.299138
	OXER1	165140	oxoeicosanoid receptor 1	171.478	0.112814	0.17081	0.00850859	0.299138
	JAZF1	221895	JAZF zinc finger 1	48.5904	0.110115	0.321976	0.00844798	0.299138
	CPSF7	79869	cleavage and polyadenylation specific factor 7	691.46	-0.0980313	0.080265	0.0082707	0.299138
	HECA	51696	hdc homolog, cell cycle regulator	828.361	-0.10167	0.0882669	0.00832707	0.299138
	CAST	831	calpastatin	1076.93	-0.104988	0.0969997	0.00847533	0.299138
	NBPF9	400818	NBPF member 9	223.203	-0.112521	0.123452	0.00848688	0.299138
	DICER1	23405	dicer 1, ribonuclease III	781	-0.113306	0.126501	0.0084018	0.299138
	TMED8	283578	transmembrane p24 trafficking protein family member 8	234.306	-0.113725	0.128273	0.00835385	0.299138
	MAK	4117	male germ cell associated kinase	79.3816	-0.115229	0.214035	0.00827295	0.299138
	PARK7	11315	Parkinsonism associated deglycase	345.574	0.108242	0.106542	0.00854	0.299471
	WWOX	51741	WW domain containing oxidoreductase	23.5931	0.114068	0.231563	0.00864857	0.3025
	DMTF1	9988	cyclin D binding myb like transcription factor 1	214.855	-0.112708	0.138168	0.00870924	0.303843
	MAEA	10296	macrophage erythroblast attacher	804.576	-0.101981	0.0922123	0.00885507	0.305803
	ELF1	1997	E74 like ETS transcription factor 1	1010.5	-0.104255	0.0974842	0.00879368	0.305803
	NAMPTP1	646309	nicotinamide phosphoribosyltransferase pseudogene 1	993.33	-0.11083	0.180989	0.00884776	0.305803
	WDR74	54663	WD repeat domain 74	551.339	-0.111363	0.20282	0.00883302	0.305803
	ZNRF1	84937	zinc and ring finger 1	41.1699	0.111173	0.211505	0.00893804	0.306232
	IQCE	23288	IQ motif containing E	214.055	-0.110243	0.179347	0.00895833	0.306232
	RAB12	201475	RAB12, member RAS oncogene family	99.8932	-0.11067	0.160059	0.00897975	0.306232
	NFKBIZ	64332	NFKB inhibitor zeta	474.214	-0.111224	0.152381	0.00894259	0.306232
	SLC26A11	284129	solute carrier family 26 member 11	84.0215	-0.111333	0.153518	0.00890983	0.306232
	GZMB	3002	granzyme B	465.52	0.109824	0.168355	0.00908017	0.308884
	DIP2A	23181	disco interacting protein 2 homolog A	428.506	0.110507	0.13898	0.00919533	0.312024
	NDUFV3	4731	NADH:ubiquinone oxidoreductase subunit V3	212.861	0.107577	0.112517	0.00925023	0.313108
	NHS	4810	NHS actin remodeling regulator	42.1404	0.111738	0.268285	0.00931291	0.313856
	KIF2C	11004	kinesin family member 2C	19.3617	0.11151	0.264964	0.00934137	0.313856
	ASF1B	55723	anti-silencing function 1B histone chaperone	126.865	0.10845	0.196	0.00933154	0.313856
	SDC4	6385	syndecan 4	19.4584	0.109105	0.2225	0.00942036	0.315733
	IKZF3	22806	IKAROS family zinc finger 3	738.688	0.109192	0.130964	0.00948857	0.317239
	AC022415.2			8.77745	0.0862517	0.30996	0.00952362	0.317411
	AOAH	313	acyloxyacyl hydrolase	1064.64	-0.108571	0.124537	0.00954025	0.317411
	SULT1A1	6817	sulfotransferase family 1A member 1	260.958	0.107534	0.154785	0.00968625	0.321485
	BMPR1A	657	bone morphogenetic protein receptor type 1A	67.0365	-0.108021	0.233518	0.00973105	0.321579
	AL590560.2			16.4178	-0.108956	0.257525	0.00973625	0.321579
	SERPINH1	871	serpin family H member 1	73.0475	0.107119	0.152098	0.00981515	0.321847
	ACACB	32	acetyl-CoA carboxylase beta	82.5766	0.106853	0.216894	0.00979769	0.321847
	TMED5	50999	transmembrane p24 trafficking protein 5	444.983	-0.10778	0.126896	0.00980418	0.321847
	AMACR	23600	alpha-methylacyl-CoA racemase	46.3333	0.107999	0.256568	0.00989818	0.322013
	KLF16	83855	Kruppel like factor 16	320.073	-0.103516	0.104714	0.00991462	0.322013
	GDPD3	79153	glycerophosphodiester phosphodiesterase domain containing 3	67.2896	-0.105766	0.176877	0.00985624	0.322013
	LAMA1	284217	laminin subunit alpha 1	42.5769	-0.107676	0.246172	0.00990047	0.322013
	RDH5	5959	retinol dehydrogenase 5	32.1915	0.105199	0.183269	0.00996044	0.322732
	IER5L	389792	immediate early response 5 like	93.7243	-0.106191	0.154043	0.00999354	0.323037
	ETS2	2114	ETS proto-oncogene 2, transcription factor	494.214	-0.1055	0.160597	0.0100538	0.323452
	TLR10	81793	toll like receptor 10	156.598	-0.105728	0.158231	0.0100355	0.323452
	SMG1P4	100507526	SMG1 pseudogene 4	31.113	0.100889	0.301645	0.0100973	0.324086
	MKI67	4288	marker of proliferation Ki-67	125.449	0.103787	0.195534	0.0102829	0.328235
	TJP1	7082	tight junction protein 1	27.8945	-0.0942607	0.305029	0.0102891	0.328235
	AVL9	23080	AVL9 cell migration associated	423.598	-0.105075	0.117099	0.0102987	0.328235
	ANAPC1	64682	anaphase promoting complex subunit 1	185.425	0.105218	0.135131	0.0105121	0.329543
	P2RX1	5023	purinergic receptor P2X 1	564.983	0.104949	0.128525	0.0106064	0.329543
	SF3A3	10946	splicing factor 3a subunit 3	360.716	0.104461	0.138489	0.0106705	0.329543
	S100B	6285	S100 calcium binding protein B	28.0124	0.10348	0.230851	0.0106073	0.329543
	RBM14-RBM4	100526737	RBM14-RBM4 readthrough	22.9773	0.103447	0.236329	0.0106547	0.329543
	TATDN2	9797	TatD DNase domain containing 2	443.183	0.0978873	0.0923448	0.0105553	0.329543
	NCAM1	4684	neural cell adhesion molecule 1	15.953	0.0973148	0.300464	0.0104573	0.329543
	ZNF354B	117608	zinc finger protein 354B	163.183	-0.103266	0.179657	0.0103895	0.329543
	BACH1	571	BTB domain and CNC homolog 1	1481.71	-0.103375	0.113391	0.0106637	0.329543
	CARMIL1	55604	capping protein regulator and myosin 1 linker 1	30.3849	-0.10349	0.23283	0.0106204	0.329543
	IPMK	253430	inositol polyphosphate multikinase	247.218	-0.104396	0.139094	0.010678	0.329543
	TRIM25	7706	tripartite motif containing 25	2684.31	-0.104423	0.142537	0.0106127	0.329543
	PODXL	5420	podocalyxin like	129.318	-0.104777	0.242345	0.010426	0.329543
	LRRC25	126364	leucine rich repeat containing 25	2114.9	-0.105322	0.133164	0.0104986	0.329543
	SH3GLB1	51100	SH3 domain containing GRB2 like, endophilin B1	1273.51	-0.102352	0.164979	0.0107178	0.330027
	PRPF4B	8899	pre-mRNA processing factor 4B	203.346	0.101617	0.180363	0.0107643	0.330712
	BRIP1	83990	BRCA1 interacting protein C-terminal helicase 1	18.243	0.102164	0.258168	0.0109672	0.334684
	BEND2	139105	BEN domain containing 2	24.4815	0.101081	0.208296	0.0109576	0.334684
	LENG9	94059	leukocyte receptor cluster member 9	19.5621	-0.10129	0.215688	0.0109633	0.334684
	RAB2B	84932	RAB2B, member RAS oncogene family	177.082	0.103157	0.128252	0.0111286	0.335313
	RHAG	6005	Rh associated glycoprotein	13.4208	0.100709	0.271481	0.0111078	0.335313
	MARCO	8685	macrophage receptor with collagenous structure	129.493	0.100621	0.167694	0.0111012	0.335313
	ADARB2	105	adenosine deaminase RNA specific B2 (inactive)	30.4666	0.0951507	0.293006	0.0111085	0.335313
	PFKFB3	5209	6-phosphofructo-2-kinase/fructose-2,6-biphosphatase 3	847.363	-0.100066	0.187821	0.0111188	0.335313
	PGGT1B	5229	protein geranylgeranyltransferase type I subunit beta	213.085	-0.102702	0.11877	0.0111353	0.335313
	IKZF1	10320	IKAROS family zinc finger 1	2035.1	0.0997098	0.102927	0.0111843	0.336047
	AC104389.6			4907.2	0.100768	0.241405	0.0112457	0.337149
	SNX29P2	440352	sorting nexin 29 pseudogene 2	42.0288	0.0992634	0.180663	0.0113305	0.338945
	ERG28	11161	ergosterol biosynthesis 28 homolog	64.729	0.101988	0.136596	0.0113753	0.339541
	ECSIT	51295	ECSIT signalling integrator	63.589	0.0995279	0.224628	0.011433	0.339777
	RRM2B	50484	ribonucleotide reductase regulatory TP53 inducible subunit M2B	342.612	-0.0987277	0.101413	0.0114285	0.339777
	ZBTB18	10472	zinc finger and BTB domain containing 18	730.005	-0.0980868	0.0995701	0.0114888	0.340692
	GANAB	23193	glucosidase II alpha subunit	862.869	0.0939921	0.0872958	0.0115493	0.341743
	SNX15	29907	sorting nexin 15	188.088	0.100657	0.127146	0.0119064	0.348466
	MICAL2	9645	microtubule associated monooxygenase, calponin and LIM domain containing 2	1433.53	0.0981924	0.159269	0.0118642	0.348466
	DDX11L9	100288486	DEAD/H-box helicase 11 like 9	30.0366	0.0975731	0.229658	0.0119234	0.348466
	PLEKHG3	26030	pleckstrin homology and RhoGEF domain containing G3	704.059	0.0975414	0.164007	0.0119489	0.348466
	CLEC11A	6320	C-type lectin domain containing 11A	32.4063	0.0968641	0.202619	0.0119533	0.348466
	BORCS8-MEF2B	4207	BORCS8-MEF2B readthrough	65.5069	-0.0967599	0.194713	0.0119553	0.348466
	APBB1IP	54518	amyloid beta precursor protein binding family B member 1 interacting protein	2338.41	-0.100576	0.119792	0.0118874	0.348466
	MYO7B	4648	myosin VIIB	117.094	0.096364	0.194209	0.0120585	0.349949
	RASGRP1	10125	RAS guanyl releasing protein 1	15.8422	-0.0876162	0.288499	0.0120866	0.349949
	ELF3	1999	E74 like ETS transcription factor 3	9.05219	-0.0877594	0.287576	0.0121601	0.349949
	TMX4	56255	thioredoxin related transmembrane protein 4	851.651	-0.0988558	0.109708	0.0121149	0.349949
	CXCR2	3579	C-X-C motif chemokine receptor 2	9957.72	-0.0998938	0.126729	0.0121575	0.349949
	HIVEP2	3097	human immunodeficiency virus type I enhancer binding protein 2	291.634	-0.100252	0.126013	0.0120437	0.349949
	NR2C2AP	126382	nuclear receptor 2C2 associated protein	10.0406	0.08866	0.285734	0.0122404	0.350099
	SLC28A3	64078	solute carrier family 28 member 3	7.88842	0.0885842	0.285798	0.0122423	0.350099
	CLEC18B	497190	C-type lectin domain family 18 member B	7.26036	-0.0879499	0.286873	0.0122072	0.350099
	H1-5			39.2731	-0.0955701	0.258143	0.0122888	0.350694
	R3HDM2	22864	R3H domain containing 2	517.897	-0.0900566	0.0804889	0.0123396	0.351409
	PGM1	5236	phosphoglucomutase 1	195.444	-0.0978848	0.140154	0.012482	0.354724
	JUNB	3726	JunB proto-oncogene, AP-1 transcription factor subunit	2521.76	-0.0976858	0.141171	0.0125095	0.354764
	VRTN	55237	vertebrae development associated	12.7361	-0.0743278	0.284012	0.0125663	0.354901
	CDV3	55573	CDV3 homolog	1101.72	-0.0828011	0.0635074	0.0125463	0.354901
	OSBPL7	114881	oxysterol binding protein like 7	88.9179	0.0968377	0.146264	0.0125963	0.355012
	TARM1	441864	T cell-interacting, activating receptor on myeloid cells 1	9.03983	0.0898141	0.278159	0.0126372	0.35543
	CD93	22918	CD93 molecule	1944.69	0.0972173	0.139575	0.0127051	0.355873
	PHF13	148479	PHD finger protein 13	94.2095	-0.0976446	0.1355	0.012703	0.355873
	FECH	2235	ferrochelatase	463.072	0.0958426	0.145977	0.0129057	0.359676
	RNF14	9604	ring finger protein 14	256.27	0.0955102	0.101943	0.0129314	0.359676
	PAQR7	164091	progestin and adipoQ receptor family member 7	88.5053	0.0949993	0.152077	0.0129598	0.359676
	PLIN4	729359	perilipin 4	180.165	-0.0942657	0.163412	0.0128849	0.359676
	IER2	9592	immediate early response 2	1412.76	-0.0975243	0.125827	0.0129746	0.359676
	PDP1	54704	pyruvate dehyrogenase phosphatase catalytic subunit 1	122.531	-0.0975284	0.123158	0.0129991	0.359676
	IGHA2	3494	immunoglobulin heavy constant alpha 2 (A2m marker)	786.12	0.0940444	0.158736	0.0130586	0.359863
	IGF2BP2	10644	insulin like growth factor 2 mRNA binding protein 2	424.056	0.0928555	0.183497	0.0130555	0.359863
	LGALS9	3965	galectin 9	1222.49	-0.0972476	0.120349	0.013105	0.360414
	MTFR1L	56181	mitochondrial fission regulator 1 like	208.369	0.0936639	0.0961566	0.0131598	0.361193
	SLC35C1	55343	solute carrier family 35 member C1	125.549	-0.0968278	0.119418	0.0132606	0.36323
	NDUFA3	4696	NADH:ubiquinone oxidoreductase subunit A3	179.846	0.0950152	0.104194	0.0133791	0.365741
	TRIM44	54765	tripartite motif containing 44	421.043	-0.0959382	0.128097	0.0134922	0.368095
	UPK3BL1	100134938	uroplakin 3B like 1	228.453	0.0950826	0.107154	0.0135752	0.369619
	FAM89B	23625	family with sequence similarity 89 member B	450.577	-0.0955409	0.11148	0.0136054	0.369703
	SLC35E1	79939	solute carrier family 35 member E1	424.966	0.0945894	0.105396	0.0136799	0.370253
	PACSIN2	11252	protein kinase C and casein kinase substrate in neurons 2	1294.83	-0.0957433	0.117222	0.0136721	0.370253
	RSU1	6251	Ras suppressor protein 1	138.998	0.0948003	0.131956	0.0137734	0.370578
	ZBTB34	403341	zinc finger and BTB domain containing 34	392.209	-0.0940468	0.10277	0.0137208	0.370578
	POR	5447	cytochrome p450 oxidoreductase	520.769	-0.0950875	0.129719	0.0137491	0.370578
	SRF	6722	serum response factor	383.598	-0.0942958	0.106579	0.0139055	0.373395
	STIMATE	375346	STIM activating enhancer	8.66705	-0.0716985	0.275183	0.0140455	0.376414
	GNL3L	54552	G protein nucleolar 3 like	483.394	0.0944077	0.123978	0.0141638	0.377611
	RPL32P3	132241	ribosomal protein L32 pseudogene 3	179.385	0.0936632	0.1056	0.0141427	0.377611
	SLC35F6	54978	solute carrier family 35 member F6	19.2246	0.0832801	0.26936	0.0142046	0.377611
	TMEM43	79188	transmembrane protein 43	804.261	-0.0874394	0.081214	0.0141802	0.377611
	MSL3	10943	MSL complex subunit 3	885.909	-0.0917924	0.145561	0.0142286	0.377611
	LNPK	80856	lunapark, ER junction formation factor	132.371	-0.0942525	0.121028	0.0142771	0.378163
	RGPD5	84220	RANBP2 like and GRIP domain containing 5	30.7334	0.0686846	0.272116	0.014333	0.378554
	SLC16A3	9123	solute carrier family 16 member 3	2944.05	-0.0939297	0.124142	0.0143474	0.378554
	PI4KA	5297	phosphatidylinositol 4-kinase alpha	209.754	0.0927584	0.134662	0.0143894	0.378931
	CRYBB2P1	1416	crystallin beta B2 pseudogene 1	102.244	0.0932796	0.118775	0.0147061	0.380118
	H1-0			274.612	0.0929858	0.124493	0.0147132	0.380118
	ATP8A1	10396	ATPase phospholipid transporting 8A1	126.897	0.0923226	0.131667	0.0146879	0.380118
	AKTIP	64400	AKT interacting protein	96.0251	0.0905681	0.145819	0.014641	0.380118
	PCLAF	9768	PCNA clamp associated factor	34.582	0.0879425	0.197376	0.0145605	0.380118
	ASPM	259266	abnormal spindle microtubule assembly	28.5581	0.0869887	0.246138	0.0145282	0.380118
	SP140	11262	SP140 nuclear body protein	297.437	-0.0898459	0.0915929	0.0146357	0.380118
	SEC22C	9117	SEC22 homolog C, vesicle trafficking protein	125.245	-0.0914544	0.142387	0.0144882	0.380118
	VCPKMT	79609	valosin containing protein lysine methyltransferase	111.113	-0.092152	0.133316	0.0146745	0.380118
	TBC1D9	23158	TBC1 domain family member 9	141.9	-0.093209	0.108387	0.0145351	0.380118
	MADD	8567	MAP kinase activating death domain	382.628	0.0920505	0.104078	0.0148465	0.380295
	KLRD1	3824	killer cell lectin like receptor D1	612.844	0.0905836	0.142636	0.0147851	0.380295
	RPS14	6208	ribosomal protein S14	2168.13	0.0888814	0.0894546	0.0148809	0.380295
	ACP6	51205	acid phosphatase 6, lysophosphatidic	90.1002	0.0872174	0.176458	0.0149368	0.380295
	PHF24	23349	PHD finger protein 24	16.1379	0.0688516	0.269599	0.0149424	0.380295
	MAGI1	9223	membrane associated guanylate kinase, WW and PDZ domain containing 1	29.436	-0.0777237	0.269669	0.0148835	0.380295
	ATF3	467	activating transcription factor 3	25.8251	-0.0869353	0.233	0.0147692	0.380295
	HMOX1	3162	heme oxygenase 1	486.425	-0.0911485	0.0997131	0.0149431	0.380295
	KCNC3	3748	potassium voltage-gated channel subfamily C member 3	40.9038	-0.0885162	0.155334	0.0149766	0.380439
	FAM117A	81558	family with sequence similarity 117 member A	876.596	0.0924873	0.112108	0.015019	0.38051
	CNOT6L	246175	CCR4-NOT transcription complex subunit 6 like	484.337	-0.0920561	0.107027	0.0150352	0.38051
	NONO	4841	non-POU domain containing octamer binding	232.799	0.0922358	0.110751	0.0151034	0.380823
	THY1	7070	Thy-1 cell surface antigen	11.6202	-0.0733325	0.270012	0.0150811	0.380823
	NUDT4	11163	nudix hydrolase 4	685.242	0.0922795	0.117201	0.0151557	0.381437
	RIT1	6016	Ras like without CAAX 1	431.533	-0.0920056	0.119565	0.0152475	0.383042
	WASHC5	9897	WASH complex subunit 5	33.7015	0.0848352	0.236175	0.0153474	0.384843
	OGFRL1	79627	opioid growth factor receptor like 1	1715.36	0.0904091	0.131736	0.015422	0.386003
	NABP1	64859	nucleic acid binding protein 1	1706.37	-0.090701	0.128313	0.0154821	0.386798
	CDS2	8760	CDP-diacylglycerol synthase 2	967.687	-0.0898184	0.134296	0.015513	0.386862
	S100A6	6277	S100 calcium binding protein A6	3019.78	0.0909273	0.112258	0.0157781	0.392223
	ARHGEF11	9826	Rho guanine nucleotide exchange factor 11	601.61	-0.0908111	0.119314	0.0157855	0.392223
	PPRC1	23082	PPARG related coactivator 1	112.662	0.0905351	0.122259	0.015818	0.392316
	AL669918.1			71.7185	-0.0821449	0.244119	0.0159105	0.393179
	DUSP16	80824	dual specificity phosphatase 16	171.538	-0.0907241	0.114375	0.015891	0.393179
	ARPP19	10776	cAMP regulated phosphoprotein 19	549.22	0.0854345	0.0827582	0.0159467	0.393362
	GNLY	10578	granulysin	1906.41	0.0890485	0.131484	0.0159836	0.39356
	LYN	4067	LYN proto-oncogene, Src family tyrosine kinase	5255.98	-0.0896009	0.126608	0.0160267	0.393911
	CCNY	219771	cyclin Y	923	0.088735	0.0980376	0.0161768	0.395838
	TRIM66	9866	tripartite motif containing 66	76.5645	0.083364	0.196036	0.0161922	0.395838
	FUT7	2529	fucosyltransferase 7	461.683	-0.0869342	0.142522	0.0161677	0.395838
	SLC35E3	55508	solute carrier family 35 member E3	410.692	0.0850778	0.15438	0.0163064	0.395854
	TCEAL4	79921	transcription elongation factor A like 4	36.0048	0.0848779	0.15785	0.0162487	0.395854
	TTYH3	80727	tweety family member 3	57.6314	0.0828335	0.210902	0.0163122	0.395854
	HTRA3	94031	HtrA serine peptidase 3	12.6715	0.0790951	0.252748	0.0162516	0.395854
	PVRIG	79037	PVR related immunoglobulin domain containing	121.302	-0.0878851	0.133149	0.0163614	0.395854
	GALNT1	2589	polypeptide N-acetylgalactosaminyltransferase 1	348.952	-0.0883608	0.0976567	0.0163669	0.395854
	SLC23A2	9962	solute carrier family 23 member 2	273.453	0.088735	0.101863	0.0165252	0.398858
	ATG2A	23130	autophagy related 2A	851.41	0.0867252	0.137666	0.0165496	0.398858
	C12orf57	113246	chromosome 12 open reading frame 57	150.868	0.0882737	0.1259	0.016644	0.399017
	NECAB2	54550	N-terminal EF-hand calcium binding protein 2	55.0641	0.0824932	0.184071	0.0166229	0.399017
	OLIG2	10215	oligodendrocyte transcription factor 2	17.7639	0.0804723	0.238958	0.0165991	0.399017
	CD2	914	CD2 molecule	528.985	0.0886885	0.121003	0.0167067	0.399817
	SNX6	58533	sorting nexin 6	542.977	-0.0887566	0.107979	0.0168287	0.402032
	C2CD2L	9854	C2CD2 like	287.863	0.0883467	0.117697	0.0169988	0.40327
	SH3BP1	23616	SH3 domain binding protein 1	833.784	0.0845281	0.0841734	0.0169297	0.40327
	POPDC2	64091	popeye domain containing 2	18.0889	-0.0813867	0.197586	0.016954	0.40327
	ZNF254	9534	zinc finger protein 254	42.9506	-0.0818504	0.176381	0.0169896	0.40327
	CXCL1	2919	C-X-C motif chemokine ligand 1	56.6234	0.0827508	0.15802	0.0171079	0.403439
	H3C6			62.5007	0.0819324	0.168765	0.0171126	0.403439
	KIAA1522	57648	KIAA1522	36.9862	0.0817976	0.174235	0.01705	0.403439
	PDCD6IP	10015	programmed cell death 6 interacting protein	759.583	-0.0858891	0.0908605	0.0171242	0.403439
	KLC4	89953	kinesin light chain 4	55.2263	0.082775	0.156169	0.0171729	0.40384
	EHBP1	23301	EH domain binding protein 1	70.9634	0.0817078	0.16787	0.01723	0.40384
	ZFP36L1	677	ZFP36 ring finger protein like 1	3366.17	-0.0879241	0.11753	0.0172147	0.40384
	RASL10B	91608	RAS like family 10 member B	15.6611	0.0800561	0.21732	0.0172844	0.404419
	DUSP8	1850	dual specificity phosphatase 8	24.2981	-0.080593	0.186211	0.0173808	0.405407
	MYADM	91663	myeloid associated differentiation marker	2388.92	-0.0848234	0.0877374	0.0173861	0.405407
	EYS	346007	eyes shut homolog	17.8633	0.0793807	0.222872	0.0174368	0.405897
	SLC9A8	23315	solute carrier family 9 member A8	617.029	-0.0875924	0.114416	0.0174748	0.406089
	ANKRD55	79722	ankyrin repeat domain 55	39.0043	0.081859	0.157329	0.0175163	0.40636
	TMEM273	170371	transmembrane protein 273	229.466	0.0815595	0.156904	0.0176645	0.409103
	ERGIC1	57222	endoplasmic reticulum-golgi intermediate compartment 1	2312.09	-0.0870984	0.113012	0.0177674	0.410788
	PNP	4860	purine nucleoside phosphorylase	441.979	0.0861713	0.116255	0.0181704	0.410823
	SLCO4C1	353189	solute carrier organic anion transporter family member 4C1	142.242	0.0856139	0.124731	0.0179536	0.410823
	RTN2	6253	reticulon 2	116.086	0.0808833	0.15158	0.0182206	0.410823
	UROS	7390	uroporphyrinogen III synthase	69.6255	0.0807322	0.161474	0.0178502	0.410823
	CCL4L2	9560	C-C motif chemokine ligand 4 like 2	33.2537	0.0788409	0.190953	0.0180832	0.410823
	RHOBTB3	22836	Rho related BTB domain containing 3	33.8465	0.0787059	0.194245	0.0181058	0.410823
	ZIC2	7546	Zic family member 2	33.6598	-0.0726668	0.249538	0.0180184	0.410823
	UGDH	7358	UDP-glucose 6-dehydrogenase	15.7882	-0.0776878	0.229651	0.0178632	0.410823
	ATP5F1C	509	ATP synthase F1 subunit gamma	30.1591	-0.0778445	0.221452	0.0180514	0.410823
	CNTNAP3	79937	contactin associated protein like 3	119.214	-0.0780495	0.209286	0.0182054	0.410823
	PPM1N	147699	protein phosphatase, Mg2+/Mn2+ dependent 1N (putative)	41.738	-0.0792701	0.200146	0.0178024	0.410823
	AC099489.1			622.635	-0.0824483	0.143183	0.0180217	0.410823
	NOL4L	140688	nucleolar protein 4 like	358.308	-0.0834233	0.0860876	0.0181711	0.410823
	SOX4	6659	SRY-box 4	138.108	-0.0838852	0.135502	0.0179322	0.410823
	SLC66A3			169.12	-0.0867592	0.105113	0.0178981	0.410823
	SLC2A13	114134	solute carrier family 2 member 13	39.1746	0.0783875	0.190718	0.0182868	0.41099
	LIMK1	3984	LIM domain kinase 1	425.251	-0.0840303	0.130192	0.0182883	0.41099
	PNRC1	10957	proline rich nuclear receptor coactivator 1	2404.74	-0.082537	0.0835243	0.0183926	0.411976
	TNFRSF1B	7133	TNF receptor superfamily member 1B	6166.1	-0.0836439	0.0882909	0.0183868	0.411976
	DEGS1	8560	delta 4-desaturase, sphingolipid 1	398.191	-0.0856627	0.101684	0.0184305	0.412149
	CUEDC1	404093	CUE domain containing 1	207.453	0.0832542	0.132479	0.0184674	0.412298
	FCGR3A	2214	Fc fragment of IgG receptor IIIa	5353.97	-0.0857947	0.105479	0.0185051	0.412464
	EZR	7430	ezrin	746.277	-0.0856513	0.104106	0.0185523	0.412841
	SYT11	23208	synaptotagmin 11	154.738	-0.0853887	0.112359	0.0187402	0.416345
	KIF4A	24137	kinesin family member 4A	18.2017	0.0764056	0.209967	0.0188944	0.418407
	C9orf72	203228	C9orf72-SMCR8 complex subunit	474.348	-0.0835862	0.125745	0.0188758	0.418407
	DENND2C	163259	DENN domain containing 2C	13.8147	0.0758579	0.216725	0.0189734	0.418795
	ENDOG	2021	endonuclease G	32.372	-0.0796508	0.148804	0.0189545	0.418795
	KCNK6	9424	potassium two pore domain channel subfamily K member 6	425.108	0.0846027	0.101023	0.0191028	0.418834
	EDA	1896	ectodysplasin A	13.4659	0.075064	0.222264	0.0191262	0.418834
	NCKAP1	10787	NCK associated protein 1	61.235	-0.0768537	0.181715	0.0191286	0.418834
	LMNB1	4001	lamin B1	235.129	-0.0773642	0.171121	0.0191125	0.418834
	TNKS2	80351	tankyrase 2	499.937	-0.0806046	0.0789058	0.0190532	0.418834
	TMEM87B	84910	transmembrane protein 87B	148.417	-0.0842813	0.116061	0.0192165	0.420085
	LIF	3976	LIF interleukin 6 family cytokine	12.3236	0.0612085	0.249407	0.0192499	0.42014
	AC010627.1			8.15841	0.0745141	0.223502	0.0193	0.42056
	TBCE	6905	tubulin folding cofactor E	40.3806	0.0750536	0.214891	0.0193657	0.420796
	NR3C1	2908	nuclear receptor subfamily 3 group C member 1	700.685	-0.0807425	0.0809471	0.0194033	0.420796
	CTDSP1	58190	CTD small phosphatase 1	1757.79	-0.0844457	0.107672	0.0193802	0.420796
	ATP5MF	9551	ATP synthase membrane subunit f	229.833	0.0841995	0.103792	0.0194917	0.421372
	PFKFB2	5208	6-phosphofructo-2-kinase/fructose-2,6-biphosphatase 2	229.191	-0.0806889	0.13518	0.0194809	0.421372
	SYNJ2	8871	synaptojanin 2	115.755	0.082122	0.125428	0.0196581	0.42378
	PPT2	9374	palmitoyl-protein thioesterase 2	34.2133	0.0734588	0.224173	0.0196962	0.42378
	TUBA1A	7846	tubulin alpha 1a	60.1538	-0.0786898	0.144834	0.0196904	0.42378
	ZNF653	115950	zinc finger protein 653	18.4268	0.0696054	0.240824	0.0197613	0.424509
	RNPS1	10921	RNA binding protein with serine rich domain 1	423.529	0.0837767	0.104868	0.0197979	0.424628
	DGKZ	8525	diacylglycerol kinase zeta	1621.79	0.0834691	0.109106	0.0199831	0.426041
	QSOX1	5768	quiescin sulfhydryl oxidase 1	725.596	0.083087	0.114641	0.0199887	0.426041
	ARL17A	51326	ADP ribosylation factor like GTPase 17A	59.672	0.0757578	0.168783	0.0199799	0.426041
	PDK4	5166	pyruvate dehydrogenase kinase 4	129.027	-0.0807211	0.129722	0.0199784	0.426041
	KIF3C	3797	kinesin family member 3C	91.2496	0.0823691	0.119686	0.0200374	0.426413
	HTRA1	5654	HtrA serine peptidase 1	10.3494	-0.0726933	0.215967	0.0203719	0.432855
	STAT5B	6777	signal transducer and activator of transcription 5B	3021.09	-0.082523	0.113316	0.0204066	0.432918
	MCF2L2	23101	MCF.2 cell line derived transforming sequence-like 2	33.0659	-0.0726298	0.211888	0.0205477	0.433217
	SAMD4A	23034	sterile alpha motif domain containing 4A	55.6299	-0.0728773	0.208994	0.0205226	0.433217
	SOWAHC	65124	sosondowah ankyrin repeat domain family member C	20.8287	-0.0746756	0.171353	0.0204654	0.433217
	F2RL1	2150	F2R like trypsin receptor 1	236.297	-0.0809387	0.123133	0.0205206	0.433217
	BOLA2-SMG1P6	107282092	BOLA2-SMG1P6 readthrough	48.6883	0.0756875	0.15327	0.0206911	0.435566
	SLC30A4	7782	solute carrier family 30 member 4	49.4419	-0.0752018	0.157073	0.0207442	0.436011
	COL1A1	1277	collagen type I alpha 1 chain	12.5327	-0.0523092	0.239034	0.0208392	0.436703
	RNF145	153830	ring finger protein 145	816.554	-0.0816635	0.0949797	0.0208411	0.436703
	ZNF652	22834	zinc finger protein 652	472.353	0.0805551	0.0882697	0.0209582	0.437142
	TMCO3	55002	transmembrane and coiled-coil domains 3	268.545	-0.0777818	0.135785	0.0209362	0.437142
	HIPK3	10114	homeodomain interacting protein kinase 3	930.666	-0.0817736	0.0968702	0.0209094	0.437142
	FANCD2	2177	FA complementation group D2	64.0087	0.0726267	0.191327	0.0210822	0.438388
	UTP14C	9724	UTP14C small subunit processome component	56.4001	0.0676946	0.234571	0.0210556	0.438388
	CEACAM4	1089	carcinoembryonic antigen related cell adhesion molecule 4	392.262	0.0817419	0.10731	0.0211673	0.43882
	ZDHHC4	55146	zinc finger DHHC-type containing 4	56.9205	-0.0770963	0.137259	0.0211657	0.43882
	BMS1P1	399761	BMS1 pseudogene 1	86.602	0.0773888	0.133341	0.0214035	0.442372
	HAUS1	115106	HAUS augmin like complex subunit 1	12.0911	0.0636224	0.239678	0.0213715	0.442372
	SERPINB6	5269	serpin family B member 6	390.575	0.0765186	0.0724775	0.0214805	0.443292
	MCL1	4170	MCL1 apoptosis regulator, BCL2 family member	9795.47	-0.0796194	0.086702	0.0215579	0.444216
	TAF9B	51616	TATA-box binding protein associated factor 9b	34.5682	0.0742684	0.15077	0.0216287	0.444984
	LTB	4050	lymphotoxin beta	1948.59	-0.0749172	0.14533	0.0216604	0.444984
	TOPBP1	11073	DNA topoisomerase II binding protein 1	246.156	0.0808781	0.108218	0.0217347	0.44584
	ALDH6A1	4329	aldehyde dehydrogenase 6 family member A1	208.667	0.0803311	0.110975	0.0219633	0.44846
	PIAS1	8554	protein inhibitor of activated STAT 1	154.133	0.0778219	0.12516	0.0220926	0.44846
	CKAP2	26586	cytoskeleton associated protein 2	37.3789	0.0643583	0.235567	0.0219196	0.44846
	TENT5A	55603	terminal nucleotidyltransferase 5A	61.4973	-0.0510564	0.235233	0.0220854	0.44846
	TMEM38B	55151	transmembrane protein 38B	26.7987	-0.071914	0.16968	0.0220516	0.44846
	UBE2G1	7326	ubiquitin conjugating enzyme E2 G1	364.218	-0.0787466	0.0848044	0.0220624	0.44846
	SLC36A1	206358	solute carrier family 36 member 1	323.993	-0.0792828	0.11757	0.0220736	0.44846
	CCZ1B	221960	CCZ1 homolog B, vacuolar protein trafficking and biogenesis associated	143.012	0.074301	0.143809	0.0221396	0.448746
	RAB39B	116442	RAB39B, member RAS oncogene family	39.8498	-0.076405	0.131204	0.0222044	0.449393
	ST3GAL1	6482	ST3 beta-galactoside alpha-2,3-sialyltransferase 1	996.54	0.0748346	0.0690484	0.0223818	0.45214
	SCYL3	57147	SCY1 like pseudokinase 3	50.1227	-0.0735471	0.145691	0.022423	0.45214
	UBE2K	3093	ubiquitin conjugating enzyme E2 K	70.41	-0.0755068	0.133636	0.0224521	0.45214
	UVRAG	7405	UV radiation resistance associated	207.744	-0.0798916	0.0975894	0.0224727	0.45214
	MAFB	9935	MAF bZIP transcription factor B	339.715	-0.0784601	0.117694	0.0225836	0.453701
	UPF2	26019	UPF2 regulator of nonsense mediated mRNA decay	92.5472	0.0687134	0.208555	0.0226214	0.453791
	ITSN2	50618	intersectin 2	675.887	-0.078489	0.0874322	0.0227403	0.455507
	SNX8	29886	sorting nexin 8	129.535	0.0720611	0.150446	0.0229502	0.459038
	LIN28B	389421	lin-28 homolog B	14.6997	-0.0573227	0.236075	0.0229878	0.459116
	PLXND1	23129	plexin D1	408.06	0.0788645	0.109953	0.0230553	0.45912
	UBE2J1	51465	ubiquitin conjugating enzyme E2 J1	776.773	-0.0752045	0.13033	0.0230283	0.45912
	FAM219B	57184	family with sequence similarity 219 member B	118.301	0.0698476	0.172516	0.0231931	0.461191
	GPBAR1	151306	G protein-coupled bile acid receptor 1	176.509	0.0772617	0.118408	0.0232782	0.461673
	ADGRD1	283383	adhesion G protein-coupled receptor D1	9.82153	0.0520818	0.233537	0.023285	0.461673
	LIG3	3980	DNA ligase 3	165.124	0.0709493	0.154507	0.0233641	0.462569
	SNAP23	8773	synaptosome associated protein 23	1202.33	-0.0770012	0.0825275	0.0234103	0.462811
	BBS10	79738	Bardet-Biedl syndrome 10	53.0907	-0.0750004	0.12793	0.0234641	0.463203
	CLN3	1201	CLN3 lysosomal/endosomal transmembrane protein, battenin	324.178	0.0785924	0.101063	0.0236304	0.463204
	TOP2A	7153	DNA topoisomerase II alpha	84.1721	0.070819	0.151724	0.0236339	0.463204
	SLC22A17	51310	solute carrier family 22 member 17	14.6446	0.0684511	0.185544	0.0236301	0.463204
	CYP4F8	11283	cytochrome P450 family 4 subfamily F member 8	18.2179	0.0678279	0.19675	0.0236184	0.463204
	RBM7	10179	RNA binding motif protein 7	178.103	-0.0787499	0.100845	0.0235004	0.463204
	CFD	1675	complement factor D	1084.21	-0.0783617	0.106032	0.0236786	0.463414
	KEAP1	9817	kelch like ECH associated protein 1	74.3807	-0.0706563	0.151391	0.0237616	0.464373
	MYL6	4637	myosin light chain 6	2784.56	0.0782017	0.103936	0.0238951	0.464655
	PREX2	80243	phosphatidylinositol-3,4,5-trisphosphate dependent Rac exchange factor 2	11.5635	-0.0569578	0.233324	0.0238204	0.464655
	KCNMA1	3778	potassium calcium-activated channel subfamily M alpha 1	17.2742	-0.0657892	0.212691	0.0239123	0.464655
	ASPHD2	57168	aspartate beta-hydroxylase domain containing 2	86.5471	-0.0715753	0.142785	0.0238948	0.464655
	TMEM94	9772	transmembrane protein 94	156.588	0.0727224	0.134541	0.0240602	0.466668
	APOBEC3D	140564	apolipoprotein B mRNA editing enzyme catalytic subunit 3D	32.6562	0.0660275	0.208125	0.0240946	0.466668
	SMCHD1	23347	structural maintenance of chromosomes flexible hinge domain containing 1	439.925	-0.0778866	0.0956503	0.0241185	0.466668
	PADI4	23569	peptidyl arginine deiminase 4	1471.29	0.0777817	0.102537	0.0242805	0.469137
	SLC2A9	56606	solute carrier family 2 member 9	40.8572	0.0721513	0.134975	0.0243769	0.470332
	CD8A	925	CD8a molecule	704.074	0.0775606	0.0992321	0.0245056	0.470962
	PCTP	58488	phosphatidylcholine transfer protein	233.178	0.0728319	0.130693	0.0244853	0.470962
	ING1	3621	inhibitor of growth family member 1	177.579	-0.0775341	0.10144	0.0245131	0.470962
	MS4A3	932	membrane spanning 4-domains A3	85.0601	0.067484	0.176095	0.0245794	0.471573
	SSBP4	170463	single stranded DNA binding protein 4	79.9237	-0.073388	0.126172	0.0247574	0.474321
	BX322639.1			33.5485	-0.0607686	0.224223	0.0249402	0.477151
	DDX19A	55308	DEAD-box helicase 19A	72.9911	0.0732923	0.12476	0.0250335	0.478267
	ZFP42	132625	ZFP42 zinc finger protein	24.8094	-0.0646691	0.204897	0.0250814	0.478511
	PDHA1	5160	pyruvate dehydrogenase E1 alpha 1 subunit	198.94	0.0762248	0.106145	0.0253723	0.481855
	DSTYK	25778	dual serine/threonine and tyrosine protein kinase	224.702	0.076085	0.0905265	0.0255046	0.481855
	RNF115	27246	ring finger protein 115	312.272	0.0754884	0.0855684	0.0255569	0.481855
	KMT2A	4297	lysine methyltransferase 2A	518.987	0.0751391	0.112415	0.0255544	0.481855
	ARHGAP11A	9824	Rho GTPase activating protein 11A	36.2733	0.0666182	0.166782	0.0255746	0.481855
	RAD17	5884	RAD17 checkpoint clamp loader component	101.25	-0.0687643	0.145516	0.0255152	0.481855
	SP3	6670	Sp3 transcription factor	655.124	-0.0762309	0.0914325	0.0254334	0.481855
	SLC30A1	7779	solute carrier family 30 member 1	185.041	-0.0762942	0.104531	0.0254313	0.481855
	PTPRC	5788	protein tyrosine phosphatase receptor type C	883.482	-0.0764067	0.102397	0.0254507	0.481855
	GRAMD1C	54762	GRAM domain containing 1C	50.6514	0.0649073	0.192025	0.0256522	0.482651
	NRROS	375387	negative regulator of reactive oxygen species	254.134	0.0757757	0.105659	0.0257837	0.483791
	APOBR	55911	apolipoprotein B receptor	2946.3	-0.0709284	0.13069	0.0257763	0.483791
	AC245049.1			11.9497	0.0617444	0.214659	0.0258507	0.483988
	AL121845.3			137.54	-0.071332	0.128197	0.0258652	0.483988
	MED13L	23389	mediator complex subunit 13L	880.722	-0.0729957	0.073498	0.0260599	0.486963
	MTMR1	8776	myotubularin related protein 1	288.73	-0.0738502	0.11538	0.0261057	0.487153
	CTNNBIP1	56998	catenin beta interacting protein 1	116.773	0.0749886	0.1081	0.0262013	0.488268
	ANK3	288	ankyrin 3	67.0307	0.0669046	0.152486	0.0262492	0.488493
	MPPE1	65258	metallophosphoesterase 1	404.42	0.0751144	0.0919823	0.0266193	0.489007
	GSTP1	2950	glutathione S-transferase pi 1	848.355	0.0741308	0.0841217	0.0268862	0.489007
	GPX4	2879	glutathione peroxidase 4	727.558	0.073936	0.0799314	0.0263852	0.489007
	RPS19	6223	ribosomal protein S19	2254.83	0.0737715	0.0805337	0.0267045	0.489007
	TPGS2	25941	tubulin polyglutamylase complex subunit 2	542.233	0.0734338	0.113475	0.0267234	0.489007
	ANXA6	309	annexin A6	1093.05	0.0733189	0.114849	0.0265956	0.489007
	MLH3	27030	mutL homolog 3	74.3431	0.065355	0.160782	0.0268291	0.489007
	JPH4	84502	junctophilin 4	12.1559	0.0634613	0.187579	0.0268693	0.489007
	HTR3B	9177	5-hydroxytryptamine receptor 3B	18.7026	0.0630746	0.200382	0.0263722	0.489007
	NLGN4Y	22829	neuroligin 4 Y-linked	21.9201	-0.0543287	0.225284	0.0265378	0.489007
	ESRP1	54845	epithelial splicing regulatory protein 1	13.1788	-0.0547187	0.224238	0.026788	0.489007
	NPHP1	4867	nephrocystin 1	8.8887	-0.0565029	0.223523	0.0265415	0.489007
	ST8SIA4	7903	ST8 alpha-N-acetyl-neuraminide alpha-2,8-sialyltransferase 4	7.23039	-0.0584553	0.219705	0.0266613	0.489007
	TRIM45	80263	tripartite motif containing 45	8.88998	-0.0589546	0.217169	0.0268859	0.489007
	HSPA7	3311	heat shock protein family A (Hsp70) member 7	150.727	-0.0715359	0.121218	0.0268668	0.489007
	LTA4H	4048	leukotriene A4 hydrolase	2357.13	-0.0744198	0.108362	0.0266416	0.489007
	VPS35	55737	VPS35 retromer complex component	600.299	-0.075459	0.099651	0.0263987	0.489007
	H6PD	9563	hexose-6-phosphate dehydrogenase/glucose 1-dehydrogenase	529.765	0.0740727	0.0852615	0.0271163	0.489622
	FLNB	2317	filamin B	172.408	0.070279	0.125958	0.0269857	0.489622
	SIGLEC1	6614	sialic acid binding Ig like lectin 1	96.7758	0.0649136	0.160686	0.0271713	0.489622
	PRPF38A	84950	pre-mRNA processing factor 38A	39.626	0.0618229	0.202486	0.0270177	0.489622
	SMPDL3A	10924	sphingomyelin phosphodiesterase acid like 3A	46.7319	-0.0651399	0.159971	0.0270434	0.489622
	NOTCH1	4851	notch receptor 1	1682.11	-0.0741018	0.0858057	0.0271541	0.489622
	RRP12	23223	ribosomal RNA processing 12 homolog	830.466	-0.0742393	0.0872023	0.0271635	0.489622
	HEXA	3073	hexosaminidase subunit alpha	393.97	0.0744298	0.0976385	0.0274334	0.49111
	QRICH1	54870	glutamine rich 1	432.007	0.0735788	0.107466	0.0274661	0.49111
	SOX13	9580	SRY-box 13	58.6593	0.068199	0.132679	0.0274699	0.49111
	GMPR	2766	guanosine monophosphate reductase	776.237	0.067367	0.137629	0.0274113	0.49111
	TWF1	5756	twinfilin actin binding protein 1	118.457	-0.0723384	0.114312	0.0274567	0.49111
	MARCHF7			914.113	-0.0738354	0.0852359	0.0273907	0.49111
	RAB13	5872	RAB13, member RAS oncogene family	52.0264	0.0646186	0.158912	0.0275153	0.491277
	OLFML2B	25903	olfactomedin like 2B	9.41274	-0.0588764	0.213181	0.0275562	0.491365
	FMR1	2332	fragile X mental retardation 1	273.655	-0.0725104	0.112621	0.0276022	0.491542
	PRRG3	79057	proline rich and Gla domain 3	17.379	-0.0576372	0.215268	0.0278421	0.495169
	TRIM8	81603	tripartite motif containing 8	874.949	-0.0732404	0.106396	0.0278974	0.495505
	ANKRD10	55608	ankyrin repeat domain 10	376.214	-0.0737312	0.0894539	0.0279506	0.495806
	MXD1	4084	MAX dimerization protein 1	6300.96	-0.0736169	0.101666	0.0280305	0.496576
	RPL9	6133	ribosomal protein L9	55.4718	0.0681359	0.129081	0.0280877	0.496944
	PAOX	196743	polyamine oxidase	7.12397	-0.0553412	0.218592	0.0281295	0.49704
	ZC3H12D	340152	zinc finger CCCH-type containing 12D	186.847	0.073022	0.105697	0.0281798	0.497042
	NCAPH2	29781	non-SMC condensin II complex subunit H2	130.538	0.0704149	0.118632	0.0282061	0.497042
	RBM43	375287	RNA binding motif protein 43	76.0567	-0.0706201	0.117596	0.0282389	0.497042
	CAPN3	825	calpain 3	63.1187	0.0689175	0.124245	0.0283295	0.497343
	SMG1P2	440354	SMG1 pseudogene 2	33.0862	0.0639505	0.155353	0.0283033	0.497343
	SERF1B	728492	small EDRK-rich factor 1B	42.7535	0.0619762	0.180412	0.0283654	0.497343
	STBD1	8987	starch binding domain 1	24.5255	0.0616343	0.180928	0.028605	0.499734
	MMP25	64386	matrix metallopeptidase 25	6410.51	-0.0704329	0.116816	0.0285406	0.499734
	SGTB	54557	small glutamine rich tetratricopeptide repeat containing beta	207.593	-0.0714488	0.111912	0.0286117	0.499734
	CUL9	23113	cullin 9	230.113	0.0730996	0.0906127	0.0287421	0.501369
	EXOC5	10640	exocyst complex component 5	215.687	-0.069317	0.120141	0.0287968	0.501683
	FUNDC2	65991	FUN14 domain containing 2	244.99	0.072141	0.106468	0.0288814	0.501999
	SLC48A1	55652	solute carrier family 48 member 1	140.327	0.0697846	0.117754	0.0288886	0.501999
	HEBP2	23593	heme binding protein 2	399.057	-0.0721903	0.104499	0.0290997	0.505024
	LOXL1	4016	lysyl oxidase like 1	12.8759	-0.0600946	0.189416	0.0292632	0.505374
	GPC4	2239	glypican 4	36.2457	-0.0606502	0.182928	0.029268	0.505374
	TUBB2B	347733	tubulin beta 2B class IIb	53.6948	-0.0610994	0.178252	0.029192	0.505374
	CHST11	50515	carbohydrate sulfotransferase 11	889.291	-0.0708431	0.0742342	0.0292272	0.505374
	PHB2	11331	prohibitin 2	499.452	0.0703888	0.0721838	0.0293638	0.506387
	KAT8	84148	lysine acetyltransferase 8	447.204	0.0709797	0.079277	0.0301145	0.507778
	DENND4C	55667	DENN domain containing 4C	130.079	0.0708496	0.107906	0.0298481	0.507778
	RPL15	6138	ribosomal protein L15	2826.07	0.070378	0.0732103	0.0296513	0.507778
	PRKY	5616	protein kinase Y-linked (pseudogene)	229.186	0.0687226	0.118031	0.0297195	0.507778
	MAN2B1	4125	mannosidase alpha class 2B member 1	1635.13	0.0686829	0.0655797	0.0300138	0.507778
	AC007342.3			80.5525	0.0683452	0.11834	0.0299758	0.507778
	UBE2C	11065	ubiquitin conjugating enzyme E2 C	21.9705	0.0599484	0.181243	0.0299523	0.507778
	LPL	4023	lipoprotein lipase	15.2925	0.0554354	0.209502	0.0300644	0.507778
	CTSV	1515	cathepsin V	13.1274	-0.0485929	0.217158	0.0300936	0.507778
	H4C14			53.1407	-0.0597999	0.181629	0.0300499	0.507778
	TNRC6A	27327	trinucleotide repeat containing adaptor 6A	108.718	-0.065469	0.132029	0.0297505	0.507778
	AQP9	366	aquaporin 9	7349.01	-0.0664971	0.126179	0.0299344	0.507778
	HIPK1	204851	homeodomain interacting protein kinase 1	835.022	-0.0686485	0.0650994	0.0299009	0.507778
	C1GALT1	56913	core 1 synthase, glycoprotein-N-acetylgalactosamine 3-beta-galactosyltransferase 1	234.026	-0.0692059	0.116878	0.0295501	0.507778
	TGFBR2	7048	transforming growth factor beta receptor 2	1837.89	-0.0702029	0.0729621	0.029849	0.507778
	MACF1	23499	microtubule actin crosslinking factor 1	1024.47	-0.0709695	0.106415	0.0299833	0.507778
	RAB43	339122	RAB43, member RAS oncogene family	958.191	-0.071967	0.102963	0.0295011	0.507778
	SRRM2	23524	serine/arginine repetitive matrix 2	1309.18	-0.072069	0.0905771	0.0299386	0.507778
	SREBF1	6720	sterol regulatory element binding transcription factor 1	248.57	0.0697243	0.111374	0.0302301	0.507844
	TCP11L1	55346	t-complex 11 like 1	48.1222	0.0687487	0.115669	0.0301986	0.507844
	PPIAP79	100289244	peptidylprolyl isomerase A pseudogene 79	8.67023	-0.0584633	0.193067	0.0302262	0.507844
	MORC4	79710	MORC family CW-type zinc finger 4	235.621	0.0710254	0.0812046	0.030375	0.508852
	SLFN12	55106	schlafen family member 12	56.0004	0.0690897	0.113654	0.030328	0.508852
	FBXL16	146330	F-box and leucine rich repeat protein 16	56.3088	-0.0628832	0.14304	0.030402	0.508852
	MYBPC3	4607	myosin binding protein C, cardiac	67.0521	-0.0643677	0.13341	0.030464	0.509264
	DEPDC4	120863	DEP domain containing 4	17.2072	-0.0572792	0.198108	0.0305916	0.5106
	H4-16			20.1527	-0.058632	0.187024	0.0306188	0.5106
	APRT	353	adenine phosphoribosyltransferase	323.899	0.0712524	0.0864809	0.0307011	0.510848
	ABO	28	ABO, alpha 1-3-N-acetylgalactosaminyltransferase and alpha 1-3-galactosyltransferase	36.5346	0.0574882	0.195716	0.0307086	0.510848
	CCDC144CP	348254	coiled-coil domain containing 144C, pseudogene	12.0405	0.0523184	0.21278	0.0308278	0.51091
	CYB5R2	51700	cytochrome b5 reductase 2	23.1369	-0.0543852	0.208597	0.0308376	0.51091
	RC3H1	149041	ring finger and CCCH-type domains 1	564.477	-0.0699927	0.0758953	0.0308621	0.51091
	TXNRD1	7296	thioredoxin reductase 1	589.52	-0.0705701	0.103622	0.0308046	0.51091
	IVD	3712	isovaleryl-CoA dehydrogenase	223.309	0.0700612	0.105424	0.031029	0.51149
	GALNT3	2591	polypeptide N-acetylgalactosaminyltransferase 3	190.254	-0.063304	0.135655	0.0310439	0.51149
	NFKBIE	4794	NFKB inhibitor epsilon	167.601	-0.0703739	0.103329	0.0310471	0.51149
	INSIG1	3638	insulin induced gene 1	259.139	-0.0704805	0.0805187	0.0310224	0.51149
	SELENBP1	8991	selenium binding protein 1	429.977	0.065522	0.124298	0.0311533	0.511817
	ZNF559	84527	zinc finger protein 559	51.4697	-0.0597058	0.166165	0.0311796	0.511817
	ACLY	47	ATP citrate lyase	575.615	-0.0673968	0.0625705	0.031133	0.511817
	CCDC144B	284047	coiled-coil domain containing 144B (pseudogene)	79.2379	0.0588208	0.176431	0.0312572	0.512475
	TM2D1	83941	TM2 domain containing 1	89.467	-0.0678092	0.114179	0.0313705	0.512794
	NCOA3	8202	nuclear receptor coactivator 3	544.776	-0.0698008	0.077187	0.0314147	0.512794
	TMEM50A	23585	transmembrane protein 50A	913.39	-0.0699535	0.0781258	0.0313686	0.512794
	TNPO1	3842	transportin 1	549.581	-0.070286	0.101252	0.031427	0.512794
	MRPL55	128308	mitochondrial ribosomal protein L55	72.4164	0.0674105	0.114405	0.0316861	0.513619
	SLC14A1	6563	solute carrier family 14 member 1 (Kidd blood group)	428.083	0.0635455	0.130666	0.0316687	0.513619
	TULP4	56995	TUB like protein 4	78.5915	-0.063759	0.129419	0.031707	0.513619
	IMPA2	3613	inositol monophosphatase 2	495.546	-0.0671416	0.115233	0.0317411	0.513619
	ARNTL	406	aryl hydrocarbon receptor nuclear translocator like	297.763	-0.0683067	0.111035	0.0316162	0.513619
	SAT1	6303	spermidine/spermine N1-acetyltransferase 1	3424.6	-0.0689761	0.108202	0.0315766	0.513619
	MFAP1	4236	microfibril associated protein 1	207.685	-0.0699568	0.0794867	0.0316025	0.513619
	FAM172A	83989	family with sequence similarity 172 member A	98.5686	-0.0663492	0.118143	0.031784	0.513704
	SNRNP40	9410	small nuclear ribonucleoprotein U5 subunit 40	168.596	0.0700901	0.0850121	0.0321138	0.514229
	DCAF6	55827	DDB1 and CUL4 associated factor 6	139.867	0.0622876	0.134292	0.0321935	0.514229
	MYOM1	8736	myomesin 1	24.865	0.0566438	0.190364	0.0319619	0.514229
	OSBPL6	114880	oxysterol binding protein like 6	14.2769	0.0527777	0.206917	0.0321253	0.514229
	AIFM3	150209	apoptosis inducing factor mitochondria associated 3	28.6654	-0.0594493	0.156502	0.0321842	0.514229
	NPM3	10360	nucleophosmin/nucleoplasmin 3	24.2764	-0.0605792	0.146887	0.0320621	0.514229
	NR4A1	3164	nuclear receptor subfamily 4 group A member 1	56.9756	-0.0619548	0.137072	0.0320598	0.514229
	NBPF10	100132406	NBPF member 10	255.718	-0.0695423	0.103386	0.0318974	0.514229
	PPP3R1	5534	protein phosphatase 3 regulatory subunit B, alpha	803.001	-0.0700557	0.0824649	0.0318929	0.514229
	PTAR1	375743	protein prenyltransferase alpha subunit repeat containing 1	302.924	-0.0702326	0.0958064	0.0320276	0.514229
	DHRS3	9249	dehydrogenase/reductase 3	73.0677	0.0635014	0.127751	0.0322697	0.514842
	MS4A14	84689	membrane spanning 4-domains A14	42.3691	-0.0588782	0.160575	0.0323873	0.516116
	PRAM1	84106	PML-RARA regulated adaptor molecule 1	1144.04	0.0697019	0.0955477	0.0326721	0.518492
	SH2D2A	9047	SH2 domain containing 2A	160.258	0.0670072	0.111935	0.0326566	0.518492
	EMG1	10436	EMG1 N1-specific pseudouridine methyltransferase	108.42	0.0626183	0.129908	0.0326711	0.518492
	DNAJC21	134218	DnaJ heat shock protein family (Hsp40) member C21	244.002	-0.0697135	0.0951166	0.0326884	0.518492
	AQR	9716	aquarius intron-binding spliceosomal factor	89.0448	0.0621963	0.131709	0.0327326	0.518589
	ARHGAP18	93663	Rho GTPase activating protein 18	84.9318	0.0683695	0.105256	0.0327844	0.518807
	MME	4311	membrane metalloendopeptidase	2791.19	0.0690977	0.100445	0.0328322	0.518962
	PPIA	5478	peptidylprolyl isomerase A	813.767	0.0692017	0.0977325	0.0330612	0.519571
	CD8B	926	CD8b molecule	83.3451	0.0646581	0.119727	0.0329805	0.519571
	TOMM7	54543	translocase of outer mitochondrial membrane 7	116.782	0.0597056	0.146039	0.0330087	0.519571
	MAGED4B	81557	MAGE family member D4B	16.7658	-0.0542904	0.197629	0.0329144	0.519571
	ADAM10	102	ADAM metallopeptidase domain 10	1130.58	-0.0694931	0.093935	0.0330291	0.519571
	MAT2B	27430	methionine adenosyltransferase 2B	79.2569	0.0632604	0.123644	0.0333852	0.52406
	ZFP91	80829	ZFP91 zinc finger protein	424.429	0.067287	0.0695588	0.0336684	0.524233
	ARHGEF12	23365	Rho guanine nucleotide exchange factor 12	336.851	0.0665188	0.11062	0.0334632	0.524233
	DNAJA3	9093	DnaJ heat shock protein family (Hsp40) member A3	117.873	0.0662341	0.110885	0.0336843	0.524233
	COL19A1	1310	collagen type XIX alpha 1 chain	15.9037	0.0561983	0.176777	0.0336723	0.524233
	AHRR	57491	aryl-hydrocarbon receptor repressor	6.52778	0.0510424	0.205305	0.0335248	0.524233
	SALL4	57167	spalt like transcription factor 4	22.5012	-0.0560557	0.179137	0.0335949	0.524233
	ADM2	79924	adrenomedullin 2	14.4635	-0.0566907	0.171911	0.0336103	0.524233
	S1PR4	8698	sphingosine-1-phosphate receptor 4	1893.05	-0.0689461	0.0940291	0.0337037	0.524233
	ZWINT	11130	ZW10 interacting kinetochore protein	21.8284	0.0575004	0.158926	0.0339048	0.526254
	DERL1	79139	derlin 1	433.595	-0.0686376	0.0960944	0.0339108	0.526254
	STAG3L3	442578	stromal antigen 3-like 3 (pseudogene)	227.344	0.0667161	0.106716	0.0342148	0.528526
	SLC23A3	151295	solute carrier family 23 member 3	10.8893	0.0549363	0.184576	0.0341029	0.528526
	CEP290	80184	centrosomal protein 290	25.0412	0.0536724	0.192882	0.0341541	0.528526
	METTL7B	196410	methyltransferase like 7B	9.69966	-0.0494583	0.205728	0.034251	0.528526
	FCGR2A	2212	Fc fragment of IgG receptor IIa	1472.79	-0.0656652	0.111197	0.0341838	0.528526
	ANXA2	302	annexin A2	1555.94	0.0665156	0.0673179	0.0344006	0.528921
	GGTA1			38.2893	0.0601914	0.13351	0.0343799	0.528921
	ELOVL7	79993	ELOVL fatty acid elongase 7	31.9861	0.0599413	0.134651	0.0344317	0.528921
	HCAR2	338442	hydroxycarboxylic acid receptor 2	696.535	-0.0617201	0.126121	0.0343343	0.528921
	RALGDS	5900	ral guanine nucleotide dissociation stimulator	404.649	0.068342	0.0902374	0.034667	0.530385
	ANO6	196527	anoctamin 6	16.0975	-0.0530632	0.193471	0.0345778	0.530385
	IGF2BP1	10642	insulin like growth factor 2 mRNA binding protein 1	40.1817	-0.0569312	0.157622	0.034621	0.530385
	DENND10			436.031	-0.0681981	0.0936717	0.0346824	0.530385
	CENATAC			191.601	0.0682315	0.0916884	0.0347637	0.530438
	PICALM	8301	phosphatidylinositol binding clathrin assembly protein	2877.59	-0.0682918	0.0872865	0.0347411	0.530438
	RANBP10	57610	RAN binding protein 10	486.632	0.0654243	0.109467	0.0348943	0.531835
	ZEB2	9839	zinc finger E-box binding homeobox 2	887.712	-0.0665526	0.103773	0.0350802	0.534073
	HCFC1	3054	host cell factor C1	125.787	0.0620221	0.121089	0.035245	0.535387
	ATOH8	84913	atonal bHLH transcription factor 8	25.0002	0.0527785	0.191037	0.0352183	0.535387
	ADORA3	140	adenosine A3 receptor	28.5459	0.0581771	0.140681	0.0353046	0.535695
	FAM20B	9917	FAM20B glycosaminoglycan xylosylkinase	140.653	0.0676788	0.093066	0.0354113	0.536718
	DYNLL1	8655	dynein light chain LC8-type 1	72.6932	0.0598937	0.129417	0.0354932	0.537362
	ZMYND8	23613	zinc finger MYND-type containing 8	237.91	0.0673421	0.0947885	0.0356888	0.537741
	DHX16	8449	DEAH-box helicase 16	372.712	0.0659766	0.0685074	0.0357548	0.537741
	GJC1	10052	gap junction protein gamma 1	71.3118	-0.0546947	0.172158	0.0356321	0.537741
	NAMPT	10135	nicotinamide phosphoribosyltransferase	16146.5	-0.0615236	0.121158	0.035745	0.537741
	RAP1A	5906	RAP1A, member of RAS oncogene family	1007.91	-0.0671808	0.0775945	0.0356001	0.537741
	GAPT	202309	GRB2 binding adaptor protein, transmembrane	302.537	-0.0672683	0.0951895	0.0357384	0.537741
	MFAP3L	9848	microfibril associated protein 3 like	49.2479	0.0589353	0.132684	0.0358536	0.538634
	MED6	10001	mediator complex subunit 6	111.054	0.0660836	0.102506	0.03591	0.538887
	TUBA1C	84790	tubulin alpha 1c	209.596	0.0661248	0.101925	0.0359914	0.539516
	PILRB	29990	paired immunoglobin like type 2 receptor beta	464.201	0.0671511	0.0805868	0.0360408	0.539527
	STRN3	29966	striatin 3	77.2464	-0.0615527	0.119828	0.0360713	0.539527
	ADRB2	154	adrenoceptor beta 2	91.35	0.0631475	0.113553	0.0361675	0.540373
	NDUFA13	51079	NADH:ubiquinone oxidoreductase subunit A13	405.27	0.0668464	0.079363	0.0363976	0.541068
	ERBB2	2064	erb-b2 receptor tyrosine kinase 2	117.997	0.0638017	0.11058	0.0363338	0.541068
	ATXN10	25814	ataxin 10	56.9424	0.0556973	0.153046	0.036452	0.541068
	FRMD4A	55691	FERM domain containing 4A	63.683	0.055212	0.158322	0.036431	0.541068
	CALCRL	10203	calcitonin receptor like receptor	15.551	0.0536813	0.176381	0.0362642	0.541068
	PGM3	5238	phosphoglucomutase 3	49.3615	-0.0585819	0.13196	0.0363812	0.541068
	TPRG1	285386	tumor protein p63 regulated 1	11.0402	0.0516677	0.188752	0.0366104	0.542829
	ARL8A	127829	ADP ribosylation factor like GTPase 8A	457.952	-0.0660393	0.0990411	0.0367007	0.543577
	SNAP29	9342	synaptosome associated protein 29	9.80607	0.0505606	0.193303	0.0367486	0.543695
	ITGAL	3683	integrin subunit alpha L	579.776	0.0662704	0.0964088	0.0368725	0.544938
	AC015911.9			14.7493	0.0537808	0.168969	0.0369528	0.545245
	PAG1	55824	phosphoprotein membrane anchor with glycosphingolipid microdomains 1	658.353	-0.065359	0.101675	0.0369732	0.545245
	CCL5	6352	C-C motif chemokine ligand 5	2515.33	0.0666413	0.0902786	0.0370454	0.545719
	AK1	203	adenylate kinase 1	243.152	0.0593875	0.124027	0.0373035	0.546478
	RECQL4	9401	RecQ like helicase 4	22.9873	0.0547484	0.154888	0.0373373	0.546478
	PRDM10	56980	PR/SET domain 10	61.8158	0.0536794	0.166634	0.037314	0.546478
	DENND2B			7.66283	0.040588	0.203124	0.0372245	0.546478
	GADD45B	4616	growth arrest and DNA damage inducible beta	544.055	-0.0636713	0.108206	0.0371854	0.546478
	B3GNT2	10678	UDP-GlcNAc:betaGal beta-1,3-N-acetylglucosaminyltransferase 2	149.656	-0.0647998	0.103122	0.0372941	0.546478
	UXS1	80146	UDP-glucuronate decarboxylase 1	79.9723	0.0614742	0.115432	0.0374314	0.547269
	SRGAP2	23380	SLIT-ROBO Rho GTPase activating protein 2	414.214	0.066183	0.0917333	0.0375905	0.547833
	AC100868.1			12.6434	-0.0467896	0.200227	0.0375707	0.547833
	TPPP3	51673	tubulin polymerization promoting protein family member 3	38.1834	-0.0548884	0.151776	0.0375369	0.547833
	RNASEH2B	79621	ribonuclease H2 subunit B	207.744	0.0661607	0.0831127	0.0378378	0.547894
	AL355916.3			39.7525	0.0603367	0.118057	0.037908	0.547894
	EPCAM	4072	epithelial cell adhesion molecule	32.3667	-0.0520969	0.177927	0.0377806	0.547894
	LGALS9C	654346	galectin 9C	35.8756	-0.0573843	0.131325	0.0378636	0.547894
	FAM43A	131583	family with sequence similarity 43 member A	85.8192	-0.0625328	0.110302	0.0378444	0.547894
	VEZF1	7716	vascular endothelial zinc finger 1	390.821	-0.0650329	0.0698511	0.037916	0.547894
	HIF1AN	55662	hypoxia inducible factor 1 subunit alpha inhibitor	619.468	-0.0660847	0.0904436	0.0378431	0.547894
	GNA13	10672	G protein subunit alpha 13	1108.49	-0.0661124	0.0897687	0.03785	0.547894
	DPEP3	64180	dipeptidase 3	45.3617	0.0567061	0.134136	0.0380826	0.548029
	HJURP	55355	Holliday junction recognition protein	36.3289	0.0558345	0.13986	0.038086	0.548029
	THBS4	7060	thrombospondin 4	9.12665	0.0459839	0.200146	0.0380408	0.548029
	NBL1	4681	NBL1, DAN family BMP antagonist	16.6226	-0.0546691	0.149712	0.0380549	0.548029
	HEATR5A	25938	HEAT repeat containing 5A	164.484	-0.0630871	0.10691	0.038263	0.549416
	TOR2A	27433	torsin family 2 member A	66.1609	-0.0632863	0.106256	0.0382264	0.549416
	S1PR3	1903	sphingosine-1-phosphate receptor 3	91.7858	-0.060205	0.117197	0.038319	0.549642
	SNX18	112574	sorting nexin 18	576.016	-0.0657024	0.0881528	0.0385606	0.552526
	TTK	7272	TTK protein kinase	9.41369	0.0491562	0.189647	0.0388115	0.554621
	NFIL3	4783	nuclear factor, interleukin 3 regulated	570.647	-0.0636525	0.102559	0.0388694	0.554621
	SGSH	6448	N-sulfoglucosamine sulfohydrolase	132.644	-0.0642992	0.0995817	0.0388231	0.554621
	YIPF4	84272	Yip1 domain family member 4	823.498	-0.0653302	0.0779486	0.0388311	0.554621
	GLUL	2752	glutamate-ammonia ligase	5041.72	-0.065484	0.0860308	0.0389737	0.555528
	SLC19A3	80704	solute carrier family 19 member 3	13.0906	-0.0491653	0.188589	0.0390374	0.555855
	MYO9A	4649	myosin IXA	24.0313	0.0484422	0.19128	0.0390835	0.555931
	ZNF175	7728	zinc finger protein 175	83.4324	0.0620593	0.107876	0.0391892	0.556509
	EXO1	9156	exonuclease 1	12.8425	0.0516331	0.170958	0.0392057	0.556509
	ITM2A	9452	integral membrane protein 2A	172.325	0.0620098	0.107597	0.0393417	0.556779
	MT1L	4500	metallothionein 1L, pseudogene	8.7395	0.0458596	0.196864	0.0393964	0.556779
	PANX2	56666	pannexin 2	304.239	-0.061964	0.107572	0.0394059	0.556779
	CTDP1	9150	CTD phosphatase subunit 1	263.029	-0.063881	0.0994668	0.0394065	0.556779
	RAB33B	83452	RAB33B, member RAS oncogene family	192.662	-0.0645777	0.0950004	0.0394288	0.556779
	PFN1	5216	profilin 1	8765.57	0.0644304	0.0719003	0.0395555	0.557986
	UPF1	5976	UPF1 RNA helicase and ATPase	1253.46	-0.0646113	0.0740085	0.0395961	0.557986
	RPS15	6209	ribosomal protein S15	2658.56	0.0629819	0.0613958	0.0396689	0.558252
	KLHL14	57565	kelch like family member 14	15.0238	-0.0528339	0.154675	0.0396968	0.558252
	DDAH2	23564	dimethylarginine dimethylaminohydrolase 2	219.525	-0.0590782	0.116833	0.0397519	0.55845
	ASB2	51676	ankyrin repeat and SOCS box containing 2	25.0337	0.053475	0.147265	0.0398678	0.559503
	DDX11	1663	DEAD/H-box helicase 11	109.988	0.0564602	0.126947	0.0399837	0.560552
	CYP4F12	66002	cytochrome P450 family 4 subfamily F member 12	23.252	0.0525099	0.153397	0.0402759	0.562754
	IGF1R	3480	insulin like growth factor 1 receptor	482.049	-0.0618889	0.105422	0.0402185	0.562754
	TLR8	51311	toll like receptor 8	1352.71	-0.0620702	0.104462	0.0403057	0.562754
	CD2BP2	10421	CD2 cytoplasmic tail binding protein 2	626.461	-0.0645954	0.0881895	0.0402977	0.562754
	VPS54	51542	VPS54 subunit of GARP complex	112.33	0.0640428	0.0940752	0.0403742	0.563134
	AC015911.7			27.2265	0.0534325	0.143301	0.0405228	0.564628
	CERS6	253782	ceramide synthase 6	83.8514	-0.0346497	0.194882	0.0405811	0.564864
	PCDH9	5101	protocadherin 9	32.4118	-0.0552347	0.130631	0.0406288	0.564951
	SETD7	80854	SET domain containing 7, histone lysine methyltransferase	150.03	-0.0632134	0.0978717	0.0407294	0.565774
	CYSLTR2	57105	cysteinyl leukotriene receptor 2	57.3682	0.0545105	0.133815	0.0408589	0.56613
	WAPL	23063	WAPL cohesin release factor	90.7359	0.0510064	0.163925	0.0408796	0.56613
	GALNT7	51809	polypeptide N-acetylgalactosaminyltransferase 7	194.972	-0.0632684	0.097141	0.0408349	0.56613
	AC004057.1			381.801	0.0640739	0.0893446	0.0410263	0.566859
	DPH7	92715	diphthamide biosynthesis 7	82.1525	0.061183	0.105291	0.0411722	0.566859
	AC009779.3			62.3719	0.060875	0.106647	0.0410906	0.566859
	ABCC3	8714	ATP binding cassette subfamily C member 3	113.464	0.0585439	0.114599	0.0411601	0.566859
	SMPD4	55627	sphingomyelin phosphodiesterase 4	134.711	0.058528	0.114936	0.0410618	0.566859
	AL157935.2			117.484	0.0539122	0.135648	0.0412646	0.566859
	GALNT4	8693	polypeptide N-acetylgalactosaminyltransferase 4	100.359	-0.0530754	0.141764	0.0412469	0.566859
	TJP2	9414	tight junction protein 2	154.535	-0.0594649	0.111173	0.0412365	0.566859
	LST1	7940	leukocyte specific transcript 1	2367.44	0.0639928	0.0870704	0.0413656	0.567104
	HES4	57801	hes family bHLH transcription factor 4	16.8501	-0.0506044	0.164401	0.0413386	0.567104
	CCL4	6351	C-C motif chemokine ligand 4	100.905	0.0615554	0.102628	0.0415951	0.569214
	EIF4E	1977	eukaryotic translation initiation factor 4E	166.605	-0.0540766	0.132997	0.041603	0.569214
	BMT2	154743	base methyltransferase of 25S rRNA 2 homolog	119.563	-0.0593195	0.10998	0.0418633	0.571152
	STXBP2	6813	syntaxin binding protein 2	752.461	-0.0611491	0.103602	0.0418093	0.571152
	SBNO2	22904	strawberry notch homolog 2	2824.22	-0.0620833	0.0994941	0.0418703	0.571152
	BOD1L1	259282	biorientation of chromosomes in cell division 1 like 1	163.307	-0.0633408	0.091349	0.0419228	0.571298
	CD163L1	283316	CD163 molecule like 1	6.89401	0.0401999	0.196531	0.0419746	0.571433
	INPP5B	3633	inositol polyphosphate-5-phosphatase B	193.51	0.0636329	0.0860927	0.0420413	0.571702
	CDC23	8697	cell division cycle 23	96.7246	0.0627771	0.0947841	0.0421201	0.571702
	LONRF1	91694	LON peptidase N-terminal domain and ring finger 1	111.755	-0.0614044	0.101738	0.0421008	0.571702
	PLCH2	9651	phospholipase C eta 2	65.6266	-0.059461	0.108619	0.0421937	0.572132
	GTF3C2	2976	general transcription factor IIIC subunit 2	271.215	0.0634623	0.0808347	0.0424485	0.572173
	NDST1	3340	N-deacetylase and N-sulfotransferase 1	679.157	0.0617502	0.0994037	0.0423718	0.572173
	FAH	2184	fumarylacetoacetate hydrolase	77.1033	0.058881	0.110147	0.0423677	0.572173
	PKD1	5310	polycystin 1, transient receptor potential channel interacting	252.505	0.0584373	0.111565	0.0424051	0.572173
	SYT15	83849	synaptotagmin 15	37.8072	0.0503384	0.160001	0.0422888	0.572173
	VAV1	7409	vav guanine nucleotide exchange factor 1	1432.86	-0.0634372	0.0854216	0.0424209	0.572173
	MCOLN1	57192	mucolipin 1	75.4272	0.0576717	0.113986	0.0424922	0.572197
	KIAA0319	9856	KIAA0319	32.8499	-0.0529375	0.135144	0.0426843	0.574217
	HPS1	3257	HPS1 biogenesis of lysosomal organelles complex 3 subunit 1	828.822	0.0615692	0.0985136	0.04291	0.576
	MLXIP	22877	MLX interacting protein	92.6851	0.0584093	0.110261	0.0429435	0.576
	CDC42SE1	56882	CDC42 small effector 1	5030.02	-0.0624416	0.067947	0.0428647	0.576
	GSN	2934	gelsolin	1356.12	0.0619929	0.0956655	0.0430958	0.576344
	IL18BP	10068	interleukin 18 binding protein	92.1734	0.056723	0.115864	0.0430472	0.576344
	MAF1	84232	MAF1 homolog, negative regulator of RNA polymerase III	188.051	0.0563333	0.117228	0.0430749	0.576344
	ANXA7	310	annexin A7	375.234	0.0606283	0.101586	0.0432413	0.577722
	ALOX5AP	241	arachidonate 5-lipoxygenase activating protein	2489.22	0.0615406	0.0970016	0.0434091	0.577728
	NCOA4	8031	nuclear receptor coactivator 4	6809.96	0.0610937	0.0993076	0.0433528	0.577728
	EGR1	1958	early growth response 1	18.8703	0.0523551	0.136101	0.0432976	0.577728
	MTR	4548	5-methyltetrahydrofolate-homocysteine methyltransferase	19.6185	0.0468921	0.179645	0.0434913	0.577728
	NIBAN1	116496	niban apoptosis regulator 1	4157.63	-0.0581186	0.109844	0.0434958	0.577728
	CHST7	56548	carbohydrate sulfotransferase 7	126.255	-0.0601989	0.102725	0.0434338	0.577728
	PI4K2A	55361	phosphatidylinositol 4-kinase type 2 alpha	122.026	0.0616688	0.0957655	0.0435665	0.578104
	AGO3	192669	argonaute RISC catalytic component 3	373.96	0.062753	0.0799851	0.0437742	0.57816
	SNRPA	6626	small nuclear ribonucleoprotein polypeptide A	224.392	0.0626182	0.0863921	0.0437867	0.57816
	RNF121	55298	ring finger protein 121	67.9965	0.0606315	0.0988242	0.0441994	0.57816
	SLC2A1	6513	solute carrier family 2 member 1	592.97	0.0605399	0.0988456	0.0443296	0.57816
	TRGC2	6967	T cell receptor gamma constant 2	161.944	0.0594373	0.10488	0.0436743	0.57816
	BIRC5	332	baculoviral IAP repeat containing 5	123.855	0.0576703	0.110968	0.0436519	0.57816
	CD3D	915	CD3d molecule	177.901	0.0576143	0.107973	0.0449562	0.57816
	AC009053.1			57.3166	0.0569241	0.110772	0.0447514	0.57816
	ISG20L2	81875	interferon stimulated exonuclease gene 20 like 2	133.009	0.0562217	0.114397	0.0442705	0.57816
	IDO1	3620	indoleamine 2,3-dioxygenase 1	101.008	0.0545766	0.12102	0.0441604	0.57816
	AOC2	314	amine oxidase copper containing 2	105.023	0.0543799	0.123276	0.0437171	0.57816
	FBN2	2201	fibrillin 2	31.3136	0.0540593	0.122614	0.0443679	0.57816
	LYRM9	201229	LYR motif containing 9	42.104	0.0535445	0.125	0.0443656	0.57816
	S100A12	6283	S100 calcium binding protein A12	1247.77	0.0533895	0.123146	0.0451515	0.57816
	QPRT	23475	quinolinate phosphoribosyltransferase	33.9408	0.0522493	0.13175	0.0444205	0.57816
	RUNDC3A	10900	RUN domain containing 3A	572.284	0.0494451	0.150485	0.044974	0.57816
	CDCA2	157313	cell division cycle associated 2	22.2954	0.0484557	0.164259	0.0442821	0.57816
	AVPI1	60370	arginine vasopressin induced 1	8.07009	0.0479757	0.170686	0.043881	0.57816
	LRRN4CL	221091	LRRN4 C-terminal like	13.1796	0.0463437	0.176211	0.0449525	0.57816
	PAGE2B	389860	PAGE family member 2B	8.93619	0.0438685	0.187394	0.0445479	0.57816
	QDPR	5860	quinoid dihydropteridine reductase	13.8972	-0.0393053	0.192522	0.0449207	0.57816
	AS3MT	57412	arsenite methyltransferase	22.3665	-0.0408385	0.191681	0.0448578	0.57816
	G2E3	55632	G2/M-phase specific E3 ubiquitin protein ligase	13.2843	-0.0424568	0.190175	0.0445972	0.57816
	RUFY4	285180	RUN and FYVE domain containing 4	13.4069	-0.0488136	0.159801	0.0444616	0.57816
	CFAP45	25790	cilia and flagella associated protein 45	26.6698	-0.052487	0.129012	0.0447641	0.57816
	OSGIN1	29948	oxidative stress induced growth inhibitor 1	24.0885	-0.052661	0.126925	0.0450788	0.57816
	CASP4LP			42.4922	-0.0528345	0.126474	0.0449547	0.57816
	TSHZ3	57616	teashirt zinc finger homeobox 3	135.028	-0.0533983	0.123704	0.0449645	0.57816
	SEC24D	9871	SEC24 homolog D, COPII coat complex component	74.8918	-0.0535811	0.12428	0.0445283	0.57816
	STIMATE-MUSTN1	100526772	STIMATE-MUSTN1 readthrough	115.196	-0.0545536	0.119869	0.0445785	0.57816
	KIF5C	3800	kinesin family member 5C	66.4732	-0.0546217	0.117892	0.0451813	0.57816
	TCF4	6925	transcription factor 4	172.209	-0.0578761	0.108501	0.0443709	0.57816
	THAP1	55145	THAP domain containing 1	53.4154	-0.0581821	0.105595	0.045154	0.57816
	ZC3HAV1	56829	zinc finger CCCH-type containing, antiviral 1	115.829	-0.0585732	0.104327	0.0451214	0.57816
	GPR137B	7107	G protein-coupled receptor 137B	66.9982	-0.0602731	0.0984915	0.0448561	0.57816
	MIB1	57534	mindbomb E3 ubiquitin protein ligase 1	168.98	-0.0610814	0.0951594	0.0446575	0.57816
	RAB1A	5861	RAB1A, member RAS oncogene family	656.868	-0.0613481	0.0921621	0.0450089	0.57816
	EGLN1	54583	egl-9 family hypoxia inducible factor 1	1137.24	-0.0617793	0.0926546	0.0441813	0.57816
	NDEL1	81565	nudE neurodevelopment protein 1 like 1	243.84	-0.0592227	0.101699	0.0452394	0.578361
	LAMB2	3913	laminin subunit beta 2	40.4677	0.0476626	0.163093	0.0456189	0.581577
	WDR41	55255	WD repeat domain 41	109.943	-0.0600403	0.0974335	0.0455836	0.581577
	PHF23	79142	PHD finger protein 23	338.256	-0.0617914	0.0830171	0.0455817	0.581577
	RNF13	11342	ring finger protein 13	617.242	-0.0594525	0.0996642	0.0456842	0.581866
	IL27	246778	interleukin 27	8.15784	-0.0456419	0.176431	0.0458158	0.582997
	BLOC1S2	282991	biogenesis of lysosomal organelles complex 1 subunit 2	143.472	-0.0601139	0.0960245	0.0459416	0.584054
	ZFR2	23217	zinc finger RNA binding protein 2	6.71827	0.0384662	0.191195	0.046073	0.584681
	HK3	3101	hexokinase 3	557.767	-0.0548426	0.114729	0.0460767	0.584681
	AC025423.2			15.4315	0.0487687	0.149651	0.0461449	0.585003
	TRAV4	28689	T cell receptor alpha variable 4	8.37678	0.0456026	0.174537	0.0463197	0.585044
	ZNF697	90874	zinc finger protein 697	22.9487	-0.0522029	0.125281	0.0462347	0.585044
	DDX3X	1654	DEAD-box helicase 3 X-linked	2783.15	-0.0578649	0.0476621	0.0463016	0.585044
	SSH3	54961	slingshot protein phosphatase 3	182.499	-0.0604934	0.0927626	0.046298	0.585044
	TMEM14C	51522	transmembrane protein 14C	83.7705	0.0578733	0.103519	0.0464946	0.585086
	WHAMMP3	339005	WAS protein homolog associated with actin, golgi membranes and microtubules pseudogene 3	50.3989	0.0536305	0.118377	0.0464329	0.585086
	IL17RE	132014	interleukin 17 receptor E	7.79713	0.0454135	0.175034	0.0464575	0.585086
	TEN1-CDK3	100529145	TEN1-CDK3 readthrough (NMD candidate)	35.7101	-0.0502889	0.135947	0.0463915	0.585086
	ZFYVE26	23503	zinc finger FYVE-type containing 26	222.908	0.0609328	0.0866958	0.0468227	0.587588
	CARD14	79092	caspase recruitment domain family member 14	15.8972	-0.045586	0.172716	0.0467631	0.587588
	GAS7	8522	growth arrest specific 7	1365.93	-0.0551494	0.111935	0.0467916	0.587588
	GSPT1	2935	G1 to S phase transition 1	2690.35	0.0565141	0.107115	0.046919	0.588241
	TCN2	6948	transcobalamin 2	83.22	-0.0549974	0.112061	0.0469609	0.588241
	ATP5F1E	514	ATP synthase F1 subunit epsilon	775.005	0.0600914	0.0891135	0.0479288	0.588608
	MGST2	4258	microsomal glutathione S-transferase 2	65.935	0.0579222	0.10117	0.0474394	0.588608
	DCLRE1C	64421	DNA cross-link repair 1C	232.922	0.0576992	0.100533	0.048069	0.588608
	CLPTM1L	81037	CLPTM1 like	104.062	0.0573677	0.10185	0.0480092	0.588608
	MARCKSL1	65108	MARCKS like 1	446.743	0.056775	0.104187	0.047864	0.588608
	WDR18	57418	WD repeat domain 18	95.0632	0.0546328	0.111616	0.0476968	0.588608
	GATA3	2625	GATA binding protein 3	139.911	0.0543086	0.113309	0.0474469	0.588608
	EZH2	2146	enhancer of zeste 2 polycomb repressive complex 2 subunit	56.4346	0.0537161	0.115942	0.0472435	0.588608
	AGAP9	642517	ArfGAP with GTPase domain, ankyrin repeat and PH domain 9	37.4535	0.0525664	0.120424	0.0472802	0.588608
	MROH6	642475	maestro heat like repeat family member 6	92.311	0.0524406	0.119128	0.0479445	0.588608
	TUBD1	51174	tubulin delta 1	36.5396	0.052048	0.120534	0.0480367	0.588608
	HSBP1L1	440498	heat shock factor binding protein 1 like 1	21.4827	0.0520279	0.12058	0.0480516	0.588608
	RNA5SP145	100873412	RNA, 5S ribosomal pseudogene 145	73.1233	-0.044875	0.172437	0.0478351	0.588608
	H1-4			19.4584	-0.0466692	0.161577	0.0473877	0.588608
	PCBP4	57060	poly(rC) binding protein 4	38.3714	-0.0467837	0.158576	0.047747	0.588608
	TMTC2	160335	transmembrane and tetratricopeptide repeat containing 2	30.055	-0.0516707	0.122882	0.0478098	0.588608
	JMJD6	23210	jumonji domain containing 6, arginine demethylase and lysine hydroxylase	213.115	-0.0584283	0.099541	0.0473307	0.588608
	RPS6KA3	6197	ribosomal protein S6 kinase A3	967.981	-0.0595957	0.0611113	0.0480263	0.588608
	BZW1	9689	basic leucine zipper and W2 domains 1	834.954	-0.0597708	0.0611293	0.0475574	0.588608
	ZNF787	126208	zinc finger protein 787	382.886	-0.0597725	0.0926785	0.0475648	0.588608
	CD46	4179	CD46 molecule	2774.82	-0.0598426	0.0632686	0.0479956	0.588608
	MAP3K2	10746	mitogen-activated protein kinase kinase kinase 2	826.571	-0.0605763	0.0729762	0.047959	0.588608
	IKBKB	3551	inhibitor of nuclear factor kappa B kinase subunit beta	550.761	-0.0606918	0.0739991	0.0477872	0.588608
	SPOPL	339745	speckle type BTB/POZ protein like	481.386	-0.0607113	0.0830567	0.0477045	0.588608
	UBE2R2	54926	ubiquitin conjugating enzyme E2 R2	1483.41	-0.0607214	0.0831586	0.0476747	0.588608
	SCPEP1	59342	serine carboxypeptidase 1	783.884	0.0604059	0.0820044	0.0484184	0.589566
	MAVS	57506	mitochondrial antiviral signaling protein	849.394	0.0600718	0.0782704	0.0493191	0.589566
	MARCHF2			752.556	0.059288	0.089295	0.0493905	0.589566
	MCM5	4174	minichromosome maintenance complex component 5	289.212	0.0588454	0.0933456	0.0489862	0.589566
	TATDN3	128387	TatD DNase domain containing 3	115.968	0.0584685	0.0938481	0.0494814	0.589566
	CHST12	55501	carbohydrate sulfotransferase 12	352.256	0.0584157	0.0952323	0.0490631	0.589566
	RPA1	6117	replication protein A1	422.736	0.0583033	0.0970017	0.0485664	0.589566
	CIDECP1	152302	cell death inducing DFFA like effector c pseudogene 1	76.1486	0.0574547	0.0985181	0.0493527	0.589566
	ADGRE3	84658	adhesion G protein-coupled receptor E3	1139.8	0.0570899	0.0997178	0.049423	0.589566
	RSPH3	83861	radial spoke head 3	99.8194	0.056759	0.101589	0.0490985	0.589566
	PIK3C2B	5287	phosphatidylinositol-4-phosphate 3-kinase catalytic subunit type 2 beta	130.224	0.0559012	0.103292	0.0496654	0.589566
	RNASE6	6039	ribonuclease A family member k6	173.814	0.0556239	0.104236	0.0496478	0.589566
	L3MBTL1	26013	L3MBTL histone methyl-lysine binding protein 1	66.3418	0.0552312	0.107656	0.0486074	0.589566
	ZNF891	101060200	zinc finger protein 891	71.4516	0.0539959	0.111879	0.0485464	0.589566
	OSBP2	23762	oxysterol binding protein 2	785.177	0.0520648	0.118281	0.0488529	0.589566
	CD164	8763	CD164 molecule	344.692	0.0515167	0.118571	0.0496132	0.589566
	ANKRD36	375248	ankyrin repeat domain 36	69.3354	0.0508982	0.121166	0.0496376	0.589566
	OR2W3	343171	olfactory receptor family 2 subfamily W member 3	212.402	0.0502889	0.125414	0.049191	0.589566
	SUCNR1	56670	succinate receptor 1	17.5318	0.0468132	0.154283	0.0484685	0.589566
	SCMH1	22955	Scm polycomb group protein homolog 1	40.6663	0.04585	0.160584	0.0488728	0.589566
	INKA1	389119	inka box actin regulator 1	9.24416	0.0445074	0.171981	0.0484778	0.589566
	CACNG6	59285	calcium voltage-gated channel auxiliary subunit gamma 6	10.4637	0.0433505	0.173654	0.0497032	0.589566
	PCDH12	51294	protocadherin 12	10.0819	0.0431651	0.177163	0.0488904	0.589566
	MID1	4281	midline 1	7.11298	-0.0397122	0.185164	0.0493469	0.589566
	CRYBG1	202	crystallin beta-gamma domain containing 1	51.7828	-0.0454933	0.162878	0.0489948	0.589566
	SLC2A11	66035	solute carrier family 2 member 11	30.0249	-0.0501658	0.127377	0.04879	0.589566
	FCRL2	79368	Fc receptor like 2	78.9175	-0.0538439	0.112672	0.0484266	0.589566
	IL4R	3566	interleukin 4 receptor	2026.81	-0.0546712	0.10759	0.0495118	0.589566
	CNOT8	9337	CCR4-NOT transcription complex subunit 8	157.701	-0.0547023	0.109883	0.048375	0.589566
	ETV6	2120	ETS variant 6	634.983	-0.056021	0.104744	0.0487721	0.589566
	DHX58	79132	DExH-box helicase 58	175.203	-0.057675	0.0981264	0.0491539	0.589566
	KCTD21	283219	potassium channel tetramerization domain containing 21	135.67	-0.0579294	0.0962334	0.0495122	0.589566
	IRF2BP1	26145	interferon regulatory factor 2 binding protein 1	129.063	-0.058538	0.0961401	0.0485077	0.589566
	DAXX	1616	death domain associated protein	321.552	-0.0590251	0.0902131	0.0496377	0.589566
	STK38	11329	serine/threonine kinase 38	1349.2	-0.0595786	0.0654132	0.0492177	0.589566
	USP15	9958	ubiquitin specific peptidase 15	696.937	-0.0598167	0.0890251	0.0484607	0.589566
	MRPS17P1	359803	mitochondrial ribosomal protein S17 pseudogene 1	34.075	0.0481715	0.136137	0.0498052	0.589751
	SMIM11B	102723553	small integral membrane protein 11B	23.6084	0.0475518	0.141003	0.0497772	0.589751
	FYN	2534	FYN proto-oncogene, Src family tyrosine kinase	901.174	0.0596736	0.0726232	0.0500618	0.590077
	AP5S1	55317	adaptor related protein complex 5 subunit sigma 1	73.947	0.0575925	0.096259	0.0500865	0.590077
	INPP1	3628	inositol polyphosphate-1-phosphatase	69.1609	0.0530906	0.11185	0.0499761	0.590077
	ZNF788P	388507	zinc finger family member 788, pseudogene	24.8299	0.0452859	0.159275	0.0500601	0.590077
	DPYSL3	1809	dihydropyrimidinase like 3	48.1349	-0.0433557	0.172273	0.0500923	0.590077
	HMGB1P3	10356	high mobility group box 1 pseudogene 3	10.0192	-0.0436537	0.171376	0.0498962	0.590077
	IRF2BP2	359948	interferon regulatory factor 2 binding protein 2	606.254	0.0593528	0.085135	0.0501772	0.590568
	RPS18	6222	ribosomal protein S18	1574.11	0.0590656	0.0854343	0.0507099	0.591612
	TTF1	7270	transcription termination factor 1	172.792	0.0589267	0.0864285	0.0507874	0.591612
	MSRB2	22921	methionine sulfoxide reductase B2	140.309	0.0571209	0.0972434	0.0504837	0.591612
	STAG3L2	442582	stromal antigen 3-like 2 (pseudogene)	119.315	0.0568478	0.0971356	0.051009	0.591612
	DNAJC9	23234	DnaJ heat shock protein family (Hsp40) member C9	89.6307	0.0567878	0.0976586	0.0508761	0.591612
	TIRAP	114609	TIR domain containing adaptor protein	94.2524	0.0551596	0.103987	0.050523	0.591612
	P2RY2	5029	purinergic receptor P2Y2	39.5713	0.0533616	0.109915	0.0504625	0.591612
	ZSWIM4	65249	zinc finger SWIM-type containing 4	43.148	0.0532346	0.109211	0.0510147	0.591612
	PDF	64146	peptide deformylase, mitochondrial	50.0116	0.0528591	0.111534	0.0504957	0.591612
	KLHDC4	54758	kelch domain containing 4	180.481	0.0525544	0.111732	0.0508966	0.591612
	TMEM161A	54929	transmembrane protein 161A	22.6743	0.0432562	0.169378	0.0510466	0.591612
	ACE	1636	angiotensin I converting enzyme	9.30333	0.042304	0.175001	0.050779	0.591612
	SLC38A11	151258	solute carrier family 38 member 11	14.1644	-0.0437388	0.166506	0.05102	0.591612
	FBXO3	26273	F-box protein 3	189.764	-0.0548276	0.104508	0.0508018	0.591612
	ZFP36	7538	ZFP36 ring finger protein	2254.6	-0.0556555	0.102208	0.0506029	0.591612
	COL18A1	80781	collagen type XVIII alpha 1 chain	760.831	-0.0573039	0.0957734	0.0507996	0.591612
	MRFAP1	93621	Morf4 family associated protein 1	1090.23	-0.0583488	0.0574328	0.050314	0.591612
	MARK2	2011	microtubule affinity regulating kinase 2	1110.63	-0.059026	0.0660157	0.0508061	0.591612
	NASP	4678	nuclear autoantigenic sperm protein	423.27	-0.058356	0.0894864	0.0511322	0.592101
	PEBP1	5037	phosphatidylethanolamine binding protein 1	301.459	0.0591751	0.0724919	0.0512712	0.593207
	TTC17	55761	tetratricopeptide repeat domain 17	282.4	0.0587544	0.0847884	0.0514823	0.595144
	DPY19L2P2	349152	DPY19L2 pseudogene 2	63.9483	0.0525167	0.110451	0.0515799	0.595767
	DCLK1	9201	doublecortin like kinase 1	9.75885	0.0347701	0.185078	0.0517647	0.596441
	BCL9	607	BCL9 transcription coactivator	59.2127	-0.0487487	0.125521	0.0517694	0.596441
	FAM160B1	57700	family with sequence similarity 160 member B1	344.176	-0.053277	0.107642	0.0517419	0.596441
	NUBPL	80224	nucleotide binding protein like	30.9574	0.0467499	0.13816	0.0518364	0.596709
	PBX1	5087	PBX homeobox 1	83.1898	0.0515995	0.112645	0.0520445	0.598095
	CMKLR1	1240	chemerin chemokine-like receptor 1	93.1786	0.0455255	0.147439	0.0520262	0.598095
	GAB3	139716	GRB2 associated binding protein 3	375.79	0.0582702	0.0636766	0.0524038	0.598249
	NTPCR	84284	nucleoside-triphosphatase, cancer-related	48.8125	0.0501053	0.118043	0.0521793	0.598249
	GOPC	57120	golgi associated PDZ and coiled-coil motif containing	35.2499	-0.0217913	0.169002	0.0523428	0.598249
	CKB	1152	creatine kinase B	47.6015	-0.0478145	0.128795	0.0524024	0.598249
	C14orf28	122525	chromosome 14 open reading frame 28	21.3151	-0.0486957	0.124102	0.0523431	0.598249
	MINDY3	80013	MINDY lysine 48 deubiquitinase 3	51.0055	-0.0538855	0.104708	0.0522673	0.598249
	NFIC	4782	nuclear factor I C	354.806	-0.0575668	0.0906422	0.0523045	0.598249
	ANP32A	8125	acidic nuclear phosphoprotein 32 family member A	1552	-0.058648	0.0701215	0.0524087	0.598249
	DNAH1	25981	dynein axonemal heavy chain 1	259.962	0.0584623	0.0815412	0.0526574	0.598564
	IPCEF1	26034	interaction protein for cytohesin exchange factors 1	309.916	0.0568971	0.0930207	0.0526996	0.598564
	PDP2	57546	pyruvate dehyrogenase phosphatase catalytic subunit 2	97.7655	0.0532042	0.106093	0.0526811	0.598564
	RNASE1	6035	ribonuclease A family member 1, pancreatic	12.5084	0.0432603	0.163705	0.0525131	0.598564
	SFRP1	6422	secreted frizzled related protein 1	55.3436	-0.0467364	0.135016	0.0526388	0.598564
	CD300H	100130520	CD300H molecule (gene/pseudogene)	52.9085	-0.0503029	0.116202	0.0526248	0.598564
	TANC2	26115	tetratricopeptide repeat, ankyrin repeat and coiled-coil containing 2	96.2825	0.0500636	0.116639	0.0528495	0.598771
	UFSP2	55325	UFM1 specific peptidase 2	33.1147	-0.0458002	0.141585	0.0527923	0.598771
	BAIAP3	8938	BAI1 associated protein 3	103.133	-0.0460083	0.139724	0.0528343	0.598771
	TNIP2	79155	TNFAIP3 interacting protein 2	49.4398	-0.0492568	0.119513	0.053064	0.600702
	SLC19A2	10560	solute carrier family 19 member 2	12.7083	-0.0426671	0.165016	0.0531907	0.601637
	CAPS	828	calcyphosine	187.471	0.0535383	0.103898	0.053303	0.601909
	AP003419.1			75.621	0.0372459	0.182085	0.0532807	0.601909
	FAM102B	284611	family with sequence similarity 102 member B	100.437	-0.0577845	0.0853627	0.0534234	0.6021
	ZBTB1	22890	zinc finger and BTB domain containing 1	186.745	-0.0581668	0.0811632	0.0533798	0.6021
	HLA-C	3107	major histocompatibility complex, class I, C	59577.9	-0.0582453	0.0789889	0.0534523	0.6021
	TNXB	7148	tenascin XB	40.0252	0.0453219	0.141361	0.0537482	0.604933
	HLA-DMB	3109	major histocompatibility complex, class II, DM beta	808.441	0.0579803	0.0800988	0.0539537	0.605812
	ARF5	381	ADP ribosylation factor 5	133.297	0.0468121	0.129779	0.0539595	0.605812
	ADAM23	8745	ADAM metallopeptidase domain 23	20.0151	-0.0406962	0.172583	0.0540039	0.605812
	CDKN2B	1030	cyclin dependent kinase inhibitor 2B	22.2188	-0.0474143	0.126166	0.0539759	0.605812
	BNIP2	663	BCL2 interacting protein 2	793.268	-0.0574039	0.0860917	0.0540574	0.605913
	NOL9	79707	nucleolar protein 9	185.464	0.0566127	0.090522	0.0542547	0.605921
	SLC16A10	117247	solute carrier family 16 member 10	21.0185	-0.033844	0.182685	0.05423	0.605921
	MBOAT2	129642	membrane bound O-acyltransferase domain containing 2	451.473	-0.0551642	0.0969092	0.0541684	0.605921
	TBL1X	6907	transducin beta like 1 X-linked	771.357	-0.0572511	0.0864745	0.0542801	0.605921
	DGLUCY	80017	D-glutamate cyclase	615.307	-0.0579296	0.0791517	0.0541843	0.605921
	KAT2B	8850	lysine acetyltransferase 2B	549.984	0.0579196	0.0729846	0.0544786	0.606209
	IKZF2	22807	IKAROS family zinc finger 2	70.0671	0.0474806	0.124472	0.0544353	0.606209
	MDM1	56890	Mdm1 nuclear protein	48.4589	-0.047694	0.123385	0.0544266	0.606209
	ERN1	2081	endoplasmic reticulum to nucleus signaling 1	427.208	-0.0571516	0.0863602	0.0545281	0.606209
	ANTXR2	118429	ANTXR cell adhesion molecule 2	662.04	-0.0578628	0.0771904	0.0545195	0.606209
	NUP188	23511	nucleoporin 188	205.578	0.0531279	0.102912	0.0545808	0.6063
	RIN2	54453	Ras and Rab interactor 2	77.6463	-0.053804	0.100485	0.05474	0.607574
	CREBBP	1387	CREB binding protein	1108.58	0.0576328	0.0799062	0.0548001	0.607703
	AC110079.1			111.185	0.0569682	0.0866497	0.0548407	0.607703
	TUBB	203068	tubulin beta class I	503.257	0.0563559	0.0900583	0.0549612	0.608543
	CAPRIN2	65981	caprin family member 2	109.483	0.0535419	0.100855	0.0550088	0.608576
	TFDP2	7029	transcription factor Dp-2	277.097	0.0554852	0.0937782	0.0551065	0.608686
	CTU1	90353	cytosolic thiouridylase subunit 1	61.0578	-0.0527179	0.10328	0.0551079	0.608686
	VLDLR	7436	very low density lipoprotein receptor	27.4482	0.0464669	0.127711	0.0552718	0.610002
	ZNF709	163051	zinc finger protein 709	8.78415	-0.0361756	0.18039	0.0553535	0.61041
	KANTR	102723508	KDM5C adjacent transcript	60.8226	0.0505374	0.109559	0.0554799	0.611309
	STAG3L5P	101735302	stromal antigen 3-like 5 pseudogene	83.8904	0.0551557	0.0942088	0.0555487	0.611573
	CPEB2	132864	cytoplasmic polyadenylation element binding protein 2	147.243	-0.0471218	0.122577	0.0558188	0.614052
	FLVCR1	28982	feline leukemia virus subgroup C cellular receptor 1	99.7472	0.0491696	0.113329	0.0560169	0.61567
	SCO2	9997	SCO cytochrome c oxidase assembly protein 2	256.444	-0.0502854	0.109316	0.0560751	0.61567
	LIN7A	8825	lin-7 homolog A, crumbs cell polarity complex component	293.794	-0.0510712	0.106724	0.0561013	0.61567
	SEC22B	9554	SEC22 homolog B, vesicle trafficking protein (gene/pseudogene)	698.19	0.0572047	0.069044	0.0562247	0.616528
	OSBPL8	114882	oxysterol binding protein like 8	1061.71	-0.0571304	0.072239	0.0565661	0.619773
	LRRC8A	56262	leucine rich repeat containing 8 VRAC subunit A	209.384	0.0566947	0.0818798	0.0566975	0.620211
	BABAM1	29086	BRISC and BRCA1 A complex member 1	514.216	0.0549107	0.0924474	0.0569089	0.620211
	MPIG6B	80739	megakaryocyte and platelet inhibitory receptor G6b	165.562	0.0494899	0.110465	0.0569243	0.620211
	IL17RC	84818	interleukin 17 receptor C	35.415	0.0470094	0.120545	0.0568469	0.620211
	TCF7L2	6934	transcription factor 7 like 2	134.388	-0.0521461	0.10244	0.0566591	0.620211
	LPCAT3	10162	lysophosphatidylcholine acyltransferase 3	304.575	-0.0535073	0.0978115	0.0568311	0.620211
	ARGLU1	55082	arginine and glutamate rich 1	788.055	-0.0570526	0.0736086	0.0567654	0.620211
	CCNJL	79616	cyclin J like	215.352	0.0492125	0.111188	0.0570548	0.621137
	SMIM7	79086	small integral membrane protein 7	247.285	0.0562095	0.0816565	0.0579217	0.621645
	PABPC1	26986	poly(A) binding protein cytoplasmic 1	854.358	0.0538205	0.0951303	0.0577394	0.621645
	TMEM106A	113277	transmembrane protein 106A	127.479	0.0528189	0.0987536	0.0576138	0.621645
	KLHDC8B	200942	kelch domain containing 8B	172.056	0.0502438	0.106385	0.0578531	0.621645
	SORBS3	10174	sorbin and SH3 domain containing 3	108.521	0.0462139	0.121929	0.0578738	0.621645
	ZNF566	84924	zinc finger protein 566	50.3261	0.0451608	0.128325	0.0576901	0.621645
	CDC6	990	cell division cycle 6	24.822	0.0436503	0.140427	0.0573193	0.621645
	CDC42EP1	11135	CDC42 effector protein 1	32.4583	0.0436048	0.139164	0.0577464	0.621645
	AC112128.1			10.703	0.0415326	0.156661	0.0575472	0.621645
	ATP7A	538	ATPase copper transporting alpha	15.5648	-0.0395155	0.16773	0.0578012	0.621645
	MGAM2	93432	maltase-glucoamylase 2 (putative)	81.3535	-0.0484185	0.113347	0.0574338	0.621645
	GSE1	23199	Gse1 coiled-coil protein	175.909	-0.0495709	0.108526	0.0578682	0.621645
	TRAK1	22906	trafficking kinesin protein 1	254.039	-0.054812	0.0921087	0.0572793	0.621645
	STIM2	57620	stromal interaction molecule 2	191.365	-0.0551482	0.0891292	0.0579213	0.621645
	DNAJC3	5611	DnaJ heat shock protein family (Hsp40) member C3	591.997	-0.0558739	0.0852138	0.0577441	0.621645
	PBX2	5089	PBX homeobox 2	1812.58	-0.0562199	0.0577507	0.0571594	0.621645
	POU2F2	5452	POU class 2 homeobox 2	1365.87	-0.0565525	0.0800443	0.0574065	0.621645
	EML2	24139	EMAP like 2	197.964	-0.0567786	0.0759492	0.0573676	0.621645
	MPZL2	10205	myelin protein zero like 2	63.2091	0.0523217	0.0984155	0.0588057	0.621814
	CETN2	1069	centrin 2	87.1221	0.0511594	0.102709	0.0583741	0.621814
	LRP3	4037	LDL receptor related protein 3	104.265	0.0495496	0.107154	0.0587265	0.621814
	TSNARE1	203062	t-SNARE domain containing 1	48.9405	0.0486075	0.1103	0.0587171	0.621814
	TRDC	28526	T cell receptor delta constant	120.257	0.048526	0.111249	0.0583445	0.621814
	PGAP3	93210	post-GPI attachment to proteins 3	89.478	0.0473318	0.115279	0.0585954	0.621814
	PHYHD1	254295	phytanoyl-CoA dioxygenase domain containing 1	8.94498	0.0395695	0.164688	0.0588536	0.621814
	TMEM132B	114795	transmembrane protein 132B	28.3303	-0.0384125	0.170791	0.0583525	0.621814
	PRLR	5618	prolactin receptor	7.2286	-0.0405166	0.160242	0.058526	0.621814
	ANKRD24	170961	ankyrin repeat domain 24	14.6516	-0.0411832	0.154741	0.0587863	0.621814
	YEATS2	55689	YEATS domain containing 2	50.5923	-0.0437319	0.134107	0.0588947	0.621814
	ZNF180	7733	zinc finger protein 180	45.9049	-0.0483662	0.111028	0.0587817	0.621814
	SNPH	9751	syntaphilin	50.6229	-0.049623	0.106858	0.058764	0.621814
	MXD3	83463	MAX dimerization protein 3	342.782	-0.0524664	0.0989988	0.0581553	0.621814
	TSPAN31	6302	tetraspanin 31	122.682	-0.0537536	0.0934675	0.0587996	0.621814
	RICTOR	253260	RPTOR independent companion of MTOR complex 2	999.075	-0.0545664	0.0916756	0.05801	0.621814
	ATF1	466	activating transcription factor 1	99.0676	-0.0545764	0.0900648	0.0587629	0.621814
	TDP2	51567	tyrosyl-DNA phosphodiesterase 2	583.243	-0.0553509	0.0876226	0.0580854	0.621814
	UNC93B1	81622	unc-93 homolog B1, TLR signaling regulator	936.286	-0.0556478	0.0849926	0.0583442	0.621814
	BUD13	84811	BUD13 homolog	128.944	-0.0557308	0.0833255	0.0586566	0.621814
	LPAR2	9170	lysophosphatidic acid receptor 2	924.764	-0.0559175	0.0807133	0.05886	0.621814
	SESN3	143686	sestrin 3	1194.66	0.051275	0.10136	0.05901	0.622548
	ZNF483	158399	zinc finger protein 483	48.9481	0.0446004	0.127633	0.0591051	0.622589
	ZMYM2	7750	zinc finger MYM-type containing 2	381.498	-0.0526383	0.0969194	0.0590941	0.622589
	INAFM2	100505573	InaF motif containing 2	272.147	0.0550152	0.0866347	0.0592405	0.622821
	CA5B	11238	carbonic anhydrase 5B	164.484	0.0525147	0.0969394	0.0593343	0.622821
	MSR1	4481	macrophage scavenger receptor 1	26.0159	-0.0423687	0.14338	0.0592811	0.622821
	RMND5B	64777	required for meiotic nuclear division 5 homolog B	148.615	-0.0556158	0.0818016	0.0593554	0.622821
	PAK2	5062	p21 (RAC1) activated kinase 2	1378.34	-0.0559523	0.0634766	0.0593449	0.622821
	OAZ2	4947	ornithine decarboxylase antizyme 2	591.649	0.0552955	0.0840231	0.0595002	0.62386
	KAZN	23254	kazrin, periplakin interacting protein	111.587	0.0499222	0.10466	0.0595536	0.623941
	GAK	2580	cyclin G associated kinase	967.588	0.0555577	0.0797565	0.0599897	0.626585
	RPL21P16	729402	ribosomal protein L21 pseudogene 16	237.902	0.0490869	0.106733	0.0599001	0.626585
	RSF1	51773	remodeling and spacing factor 1	137.886	0.0445246	0.125926	0.0598795	0.626585
	GATB	5188	glutamyl-tRNA amidotransferase subunit B	38.8365	-0.0404272	0.156098	0.0599715	0.626585
	NF2	4771	neurofibromin 2	148.737	0.0554516	0.0798493	0.0602451	0.62727
	ST6GALNAC4	27090	ST6 N-acetylgalactosaminide alpha-2,6-sialyltransferase 4	86.4518	0.0482567	0.108443	0.0605152	0.62727
	RAB34	83871	RAB34, member RAS oncogene family	68.2693	0.0473557	0.111789	0.0603924	0.62727
	MLKL	197259	mixed lineage kinase domain like pseudokinase	282.972	0.0468621	0.11394	0.0602383	0.62727
	FBXO43	286151	F-box protein 43	17.2406	0.0391958	0.162421	0.0604033	0.62727
	RTKN	6242	rhotekin	7.64928	0.0390377	0.163009	0.0604966	0.62727
	TMEM191B	728229	transmembrane protein 191B	6.98653	-0.0382922	0.166676	0.0604254	0.62727
	XRN1	54464	5'-3' exoribonuclease 1	673.645	-0.0516744	0.0980047	0.0603852	0.62727
	CDC14A	8556	cell division cycle 14A	78.4574	-0.0520508	0.0967208	0.0604323	0.62727
	CSK	1445	C-terminal Src kinase	1305.98	-0.0542537	0.088528	0.0602041	0.62727
	NAPA	8775	NSF attachment protein alpha	1515.5	0.0556792	0.0704369	0.0606875	0.628102
	PHC1	1911	polyhomeotic homolog 1	207.743	-0.0517492	0.0973381	0.0606644	0.628102
	OASL	8638	2'-5'-oligoadenylate synthetase like	327.389	-0.0507694	0.100252	0.0607569	0.628343
	WNK2	65268	WNK lysine deficient protein kinase 2	15.2002	0.0408204	0.149785	0.0609512	0.629875
	SUV39H1	6839	suppressor of variegation 3-9 homolog 1	51.632	0.0496043	0.103388	0.0610277	0.630188
	GNPTAB	79158	N-acetylglucosamine-1-phosphate transferase subunits alpha and beta	7.31358	0.0388556	0.16204	0.0612235	0.631412
	PXYLP1	92370	2-phosphoxylose phosphatase 1	71.3513	-0.052423	0.0941755	0.0612388	0.631412
	ARF3	377	ADP ribosylation factor 3	1465.08	0.0553675	0.0698379	0.0616273	0.631557
	RFWD3	55159	ring finger and WD repeat domain 3	182.89	0.0539567	0.0868353	0.061669	0.631557
	WDR4	10785	WD repeat domain 4	25.2299	0.0464134	0.112968	0.0617078	0.631557
	TRBV12-3	28577	T cell receptor beta variable 12-3	14.8678	0.0408783	0.14711	0.061578	0.631557
	TNS2	23371	tensin 2	9.34683	0.0398001	0.154881	0.0616881	0.631557
	ZNF711	7552	zinc finger protein 711	6.51972	-0.0377185	0.166751	0.0614419	0.631557
	JAM3	83700	junctional adhesion molecule 3	44.8477	-0.0432128	0.129768	0.0614273	0.631557
	PPP1R3B	79660	protein phosphatase 1 regulatory subunit 3B	1268.17	-0.0509656	0.0982313	0.0617158	0.631557
	ASAP1	50807	ArfGAP with SH3 domain, ankyrin repeat and PH domain 1	903.242	-0.0534322	0.0893504	0.0617091	0.631557
	ACAD8	27034	acyl-CoA dehydrogenase family member 8	131.14	-0.0538018	0.0879659	0.0615222	0.631557
	ZER1	10444	zyg-11 related cell cycle regulator	1009.3	0.0533588	0.089129	0.0619949	0.632514
	PDXK	8566	pyridoxal kinase	665.551	0.0499674	0.100988	0.0619152	0.632514
	CROCCP3	114819	CROCC pseudogene 3	55.405	0.0474963	0.108669	0.0619495	0.632514
	FIGN	55137	fidgetin, microtubule severing factor	25.3588	0.0364313	0.170044	0.0619624	0.632514
	RBFOX2	23543	RNA binding fox-1 homolog 2	30.7085	-0.0398324	0.153143	0.0621592	0.633717
	YY1AP1	55249	YY1 associated protein 1	959.894	0.0548931	0.0768791	0.0623539	0.634745
	TTC7A	57217	tetratricopeptide repeat domain 7A	91.103	0.0477138	0.107267	0.0623817	0.634745
	RNASEK-C17orf49	100529209	RNASEK-C17orf49 readthrough	7.3654	-0.0313023	0.175771	0.0623996	0.634745
	RACK1	10399	receptor for activated C kinase 1	4290.69	0.0538771	0.0503153	0.0627011	0.635964
	AL136295.5			55.2752	0.0410264	0.14216	0.0626561	0.635964
	KYNU	8942	kynureninase	152.16	-0.0520508	0.093142	0.0627059	0.635964
	ICAM3	3385	intercellular adhesion molecule 3	948.367	-0.0524125	0.0918575	0.0626707	0.635964
	CFP	5199	complement factor properdin	2965.86	0.0539941	0.083579	0.0629098	0.63614
	KLHL36	79786	kelch like family member 36	409.987	0.0536232	0.0859192	0.0628927	0.63614
	PSMC5	5705	proteasome 26S subunit, ATPase 5	82.764	-0.0480806	0.105407	0.0628372	0.63614
	CIC	23152	capicua transcriptional repressor	881.267	-0.0539762	0.0837609	0.0628872	0.63614
	MRPS24	64951	mitochondrial ribosomal protein S24	110.672	0.0532018	0.0879242	0.0629816	0.636394
	RPL24	6152	ribosomal protein L24	707.059	0.0542718	0.0807501	0.0631314	0.636493
	MRPL11	65003	mitochondrial ribosomal protein L11	54.1147	0.0426835	0.128456	0.0631125	0.636493
	LYRM2	57226	LYR motif containing 2	129.926	-0.0524353	0.0910475	0.0630981	0.636493
	KDR	3791	kinase insert domain receptor	14.2055	-0.0354772	0.17041	0.063254	0.636788
	CTR9	9646	CTR9 homolog, Paf1/RNA polymerase II complex component	350.428	-0.0548563	0.0687867	0.0632139	0.636788
	LRRC1	55227	leucine rich repeat containing 1	14.5016	-0.0408664	0.141174	0.0633256	0.637039
	ACP3			6.59244	0.0358959	0.169127	0.0633889	0.637206
	PGP	283871	phosphoglycolate phosphatase	125.223	0.0535215	0.0851016	0.0635057	0.637441
	ELP1	8518	elongator complex protein 1	105.638	-0.050157	0.0981617	0.0635007	0.637441
	NUFIP2	57532	nuclear FMR1 interacting protein 2	904.235	-0.0546639	0.0633436	0.0635689	0.637606
	OXA1L	5018	OXA1L mitochondrial inner membrane protein	656.948	0.0541574	0.0572341	0.0643005	0.638441
	OST4	100128731	oligosaccharyltransferase complex subunit 4, non-catalytic	670.885	0.053352	0.083261	0.064712	0.638441
	DPP3	10072	dipeptidyl peptidase 3	128.299	0.0533255	0.0844258	0.0642993	0.638441
	E2F2	1870	E2F transcription factor 2	179.401	0.0528118	0.0882277	0.0637751	0.638441
	PITHD1	57095	PITH domain containing 1	316.684	0.0518818	0.0913329	0.0642242	0.638441
	PICK1	9463	protein interacting with PRKCA 1	80.8428	0.049084	0.0994885	0.0648947	0.638441
	DNAJC17	55192	DnaJ heat shock protein family (Hsp40) member C17	66.1631	0.0488717	0.099944	0.0650275	0.638441
	NPC1	4864	NPC intracellular cholesterol transporter 1	55.2705	0.0484117	0.101149	0.0651512	0.638441
	MFSD4B	91749	major facilitator superfamily domain containing 4B	184.944	0.0474451	0.105829	0.0639156	0.638441
	DBP	1628	D-box binding PAR bZIP transcription factor	132.431	0.0463267	0.108726	0.0644406	0.638441
	ABCA9	10350	ATP binding cassette subfamily A member 9	14.9382	0.0400067	0.144148	0.0644966	0.638441
	SMIM35	100526771	small integral membrane protein 35	7.51478	0.0384426	0.156216	0.0642531	0.638441
	ABHD2	11057	abhydrolase domain containing 2	9.68727	0.0384207	0.153904	0.0651307	0.638441
	DERPC	113455421	DERPC proline and glycine rich nuclear protein	38.9332	0.0299767	0.173723	0.0651967	0.638441
	GAREM2	150946	GRB2 associated regulator of MAPK1 subtype 2	12.7004	-0.0398657	0.144143	0.0648418	0.638441
	POLR3G	10622	RNA polymerase III subunit G	45.6496	-0.0403171	0.140669	0.0648094	0.638441
	LYNX1	66004	Ly6/neurotoxin 1	26.4452	-0.0406841	0.137327	0.0649548	0.638441
	MST1	4485	macrophage stimulating 1	28.5476	-0.0412296	0.134531	0.0645173	0.638441
	SERPINE2	5270	serpin family E member 2	52.2106	-0.0421578	0.12694	0.0649389	0.638441
	FCGBP	8857	Fc fragment of IgG binding protein	57.5805	-0.0423818	0.126587	0.0645317	0.638441
	MAP3K12	7786	mitogen-activated protein kinase kinase kinase 12	113.571	-0.0450331	0.112894	0.0647977	0.638441
	SPPL2A	84888	signal peptide peptidase like 2A	198.178	-0.0512401	0.093856	0.064084	0.638441
	MTMR11	10903	myotubularin related protein 11	92.2915	-0.0515204	0.0931032	0.0639393	0.638441
	MAPK1	5594	mitogen-activated protein kinase 1	318.266	-0.0518032	0.0914014	0.0643675	0.638441
	LITAF	9516	lipopolysaccharide induced TNF factor	10308.2	-0.0522127	0.0902624	0.0640856	0.638441
	BRAT1	221927	BRCA1 associated ATM activator 1	327.889	-0.0530734	0.087102	0.0637058	0.638441
	HSBP1	3281	heat shock factor binding protein 1	273.731	-0.0531405	0.0856581	0.0642273	0.638441
	CHST15	51363	carbohydrate sulfotransferase 15	2012.05	-0.0532005	0.0844436	0.0646169	0.638441
	ROCK1	6093	Rho associated coiled-coil containing protein kinase 1	863.488	-0.0534411	0.0814169	0.0651683	0.638441
	PRKCSH	5589	protein kinase C substrate 80K-H	1463.11	-0.053959	0.053567	0.0638999	0.638441
	RBM33	155435	RNA binding motif protein 33	838.57	-0.0540828	0.0590265	0.0649782	0.638441
	DLGAP4	22839	DLG associated protein 4	299.936	-0.0543615	0.0705956	0.0647067	0.638441
	BTN3A3	10384	butyrophilin subfamily 3 member A3	573.473	-0.0543902	0.067765	0.0647108	0.638441
	H2BC6			68.0989	-0.0418527	0.127923	0.0653105	0.639096
	EHD4	30844	EH domain containing 4	153.02	0.0528635	0.0840494	0.0656782	0.640441
	RPSA	3921	ribosomal protein SA	145.711	0.0449859	0.111808	0.0655482	0.640441
	LARP7	51574	La ribonucleoprotein domain family member 7	43.2146	0.0440346	0.115499	0.0656586	0.640441
	AL669831.3			92.72	-0.0434427	0.118244	0.0656411	0.640441
	DUSP5	1847	dual specificity phosphatase 5	107.422	-0.0515861	0.0901289	0.0656827	0.640441
	RBM3	5935	RNA binding motif protein 3	922.698	0.0524515	0.0861674	0.0657503	0.640643
	PRMT7	54496	protein arginine methyltransferase 7	110.025	0.0487853	0.0988779	0.0660252	0.641946
	EMILIN2	84034	elastin microfibril interfacer 2	704.107	-0.049081	0.0980511	0.0659815	0.641946
	CPVL	54504	carboxypeptidase vitellogenic like	466.82	-0.0518723	0.0884198	0.0659998	0.641946
	TMED1	11018	transmembrane p24 trafficking protein 1	91.6635	0.0482146	0.100283	0.0662474	0.642781
	C1orf52	148423	chromosome 1 open reading frame 52	82.1478	-0.0476983	0.10193	0.0661644	0.642781
	ARHGEF2	9181	Rho/Rac guanine nucleotide exchange factor 2	1266.68	-0.0534025	0.0539513	0.0662525	0.642781
	SKAP1	8631	src kinase associated phosphoprotein 1	61.9766	0.0417447	0.125929	0.0663603	0.642969
	KRBA2	124751	KRAB-A domain containing 2	15.8685	0.0414502	0.127786	0.0663662	0.642969
	RGP1	9827	RGP1 homolog, RAB6A GEF complex partner 1	213.104	-0.0537949	0.0713518	0.0664349	0.643179
	DAPK2	23604	death associated protein kinase 2	490.007	0.0528115	0.0818531	0.0667449	0.644256
	FLCN	201163	folliculin	470.126	0.0510561	0.0901646	0.0669712	0.644256
	ALDH5A1	7915	aldehyde dehydrogenase 5 family member A1	130.058	0.0474957	0.101763	0.0667519	0.644256
	PPP1R13L	10848	protein phosphatase 1 regulatory subunit 13 like	47.3855	0.043447	0.115867	0.0668668	0.644256
	SCAPER	49855	S-phase cyclin A associated protein in the ER	22.7739	0.0356701	0.163748	0.066925	0.644256
	RAPGEF3	10411	Rap guanine nucleotide exchange factor 3	6.74777	0.0334029	0.169645	0.0669378	0.644256
	GPRIN1	114787	G protein regulated inducer of neurite outgrowth 1	9.27026	-0.0405066	0.133385	0.0667165	0.644256
	NOTCH2NLC	100996717	notch 2 N-terminal like C	108.184	-0.0465248	0.104856	0.0666577	0.644256
	ZFAND5	7763	zinc finger AN1-type containing 5	912.948	-0.0536753	0.0713045	0.0668225	0.644256
	ZNF234	10780	zinc finger protein 234	47.4591	0.0460399	0.105673	0.0671829	0.644724
	GFI1	2672	growth factor independent 1 transcriptional repressor	79.6948	0.045046	0.109094	0.0671286	0.644724
	TNFRSF4	7293	TNF receptor superfamily member 4	36.8963	0.0439945	0.113138	0.0670906	0.644724
	MIDN	90007	midnolin	1728.86	-0.0523524	0.0837158	0.0672089	0.644724
	SIRT2	22933	sirtuin 2	293.227	0.0530646	0.0774987	0.0674982	0.645362
	STARD10	10809	StAR related lipid transfer domain containing 10	187.055	0.0499854	0.093308	0.0674224	0.645362
	POLL	27343	DNA polymerase lambda	411.778	0.0496595	0.0941846	0.0675593	0.645362
	SEC22A	26984	SEC22 homolog A, vesicle trafficking protein	51.2927	0.0476553	0.100403	0.0674381	0.645362
	MTND1P23	100887749	MT-ND1 pseudogene 23	220.035	-0.0437644	0.113361	0.0675151	0.645362
	UBQLN2	29978	ubiquilin 2	380.549	-0.0505716	0.0911491	0.0675192	0.645362
	SMG5	23381	SMG5 nonsense mediated mRNA decay factor	667.287	0.0530797	0.0547036	0.067802	0.646378
	THOC5	8563	THO complex 5	488.853	-0.0506233	0.0905376	0.0678078	0.646378
	CYTIP	9595	cytohesin 1 interacting protein	1116.35	-0.0534697	0.0629283	0.0677217	0.646378
	SPNS3	201305	sphingolipid transporter 3 (putative)	47.7421	0.042368	0.119044	0.0678839	0.646651
	HELB	92797	DNA helicase B	285.459	0.0506136	0.0901618	0.0680869	0.647228
	LTB4R	1241	leukotriene B4 receptor	978.497	0.0502157	0.091672	0.0680389	0.647228
	COL17A1	1308	collagen type XVII alpha 1 chain	22.9894	0.0393123	0.138575	0.0680442	0.647228
	H3-3B			7206.79	-0.0504469	0.0907051	0.0681376	0.64726
	MPO	4353	myeloperoxidase	168.214	0.0402585	0.129654	0.0687309	0.649122
	PTX3	5806	pentraxin 3	15.841	0.0392308	0.137611	0.0685894	0.649122
	PHF8	23133	PHD finger protein 8	24.1705	0.0385582	0.143257	0.0684415	0.649122
	TRMT11	60487	tRNA methyltransferase 11 homolog	7.76315	0.0358512	0.159431	0.0687993	0.649122
	DNAI4			7.62694	0.0348647	0.163413	0.0687663	0.649122
	ZNF85	7639	zinc finger protein 85	16.7973	-0.0409351	0.125887	0.0684529	0.649122
	YIPF1	54432	Yip1 domain family member 1	295.511	-0.0481437	0.0975201	0.0685833	0.649122
	ITPR2	3709	inositol 1,4,5-trisphosphate receptor type 2	215.532	-0.0494676	0.093447	0.0685837	0.649122
	TRAM1	23471	translocation associated membrane protein 1	702.83	-0.0531792	0.0635501	0.0688095	0.649122
	LIMD2	80774	LIM domain containing 2	3240.56	-0.0532342	0.0654605	0.0686465	0.649122
	KNL1	57082	kinetochore scaffold 1	42.1643	0.038412	0.143037	0.0689025	0.64955
	CLEC12A	160364	C-type lectin domain family 12 member A	652.53	-0.0529897	0.0709744	0.0691023	0.650984
	C19orf53	28974	chromosome 19 open reading frame 53	204.758	0.0515214	0.0842049	0.0692649	0.651615
	NES	10763	nestin	29.6994	-0.0354634	0.160272	0.0692474	0.651615
	DDX46	9879	DEAD-box helicase 46	505.45	0.0528276	0.0703473	0.0697292	0.652168
	SIRT6	51548	sirtuin 6	135.983	0.0518032	0.0815334	0.0697556	0.652168
	ELOB	6923	elongin B	264.207	0.0503356	0.0885919	0.0698667	0.652168
	FSCN1	6624	fascin actin-bundling protein 1	52.8376	0.0459746	0.10236	0.069866	0.652168
	CCDC157	550631	coiled-coil domain containing 157	58.4352	0.0438358	0.109344	0.0698953	0.652168
	BBS2	583	Bardet-Biedl syndrome 2	78.2969	0.0413881	0.119988	0.0699451	0.652168
	YARS2	51067	tyrosyl-tRNA synthetase 2	7.89812	0.0224962	0.165653	0.0699266	0.652168
	AC243919.1			16.8788	-0.0374159	0.147901	0.0698022	0.652168
	CASTOR1	652968	cytosolic arginine sensor for mTORC1 subunit 1	24.2491	-0.0396982	0.131189	0.0696481	0.652168
	BNIP3	664	BCL2 interacting protein 3	50.4058	-0.0468156	0.100327	0.0694823	0.652168
	TLK1	9874	tousled like kinase 1	309.469	-0.0513819	0.0845713	0.06946	0.652168
	SRPK2	6733	SRSF protein kinase 2	575.934	-0.05148	0.0834873	0.0697518	0.652168
	MANBA	4126	mannosidase beta	410.321	-0.0529633	0.0683383	0.0694767	0.652168
	TEAD1	7003	TEA domain transcription factor 1	10.1104	-0.0252824	0.1688	0.0700273	0.652488
	POLE	5426	DNA polymerase epsilon, catalytic subunit	186.295	0.0423641	0.114841	0.0701605	0.653283
	VHL	7428	von Hippel-Lindau tumor suppressor	474.559	0.0524421	0.073922	0.0703613	0.653322
	KPNA6	23633	karyopherin subunit alpha 6	514.957	0.0521794	0.0586557	0.0722822	0.653322
	SIRPB2	284759	signal regulatory protein beta 2	1061.64	0.0520319	0.07861	0.0702593	0.653322
	C17orf49	124944	chromosome 17 open reading frame 49	297.733	0.0519589	0.07255	0.0722813	0.653322
	COX8A	1351	cytochrome c oxidase subunit 8A	427.52	0.051415	0.0801211	0.0715365	0.653322
	ANKLE2	23141	ankyrin repeat and LEM domain containing 2	168.594	0.0511618	0.0839223	0.0704294	0.653322
	LY6G5B	58496	lymphocyte antigen 6 family member G5B	212.798	0.0506352	0.0838519	0.0719855	0.653322
	MAP4K2	5871	mitogen-activated protein kinase kinase kinase kinase 2	487.73	0.0506039	0.0824047	0.072879	0.653322
	EXOSC6	118460	exosome component 6	204.981	0.0504041	0.0860463	0.0713344	0.653322
	DGKA	1606	diacylglycerol kinase alpha	337.896	0.0485179	0.0923274	0.0718724	0.653322
	LRRC28	123355	leucine rich repeat containing 28	76.0594	0.0480874	0.092598	0.0727817	0.653322
	HDGFL3	50810	HDGF like 3	85.0542	0.0473618	0.0953757	0.0723069	0.653322
	ZNF683	257101	zinc finger protein 683	67.072	0.0453313	0.102874	0.0710301	0.653322
	CTTN	2017	cortactin	101.456	0.0446713	0.10271	0.0728294	0.653322
	EIF4B	1975	eukaryotic translation initiation factor 4B	131.076	0.0443544	0.10503	0.0717579	0.653322
	SEPTIN5	5413	septin 5	95.0406	0.0439093	0.1061	0.0720623	0.653322
	XK	7504	X-linked Kx blood group	187.641	0.0436448	0.106142	0.0727114	0.653322
	ZNF567	163081	zinc finger protein 567	36.4373	0.0425911	0.112563	0.0709509	0.653322
	TLR3	7098	toll like receptor 3	26.77	0.041736	0.11308	0.0728947	0.653322
	PLVAP	83483	plasmalemma vesicle associated protein	57.2266	0.0417207	0.114902	0.0718205	0.653322
	TRBV7-2	28596	T cell receptor beta variable 7-2	27.7602	0.0416328	0.114874	0.0720737	0.653322
	PPP1R21	129285	protein phosphatase 1 regulatory subunit 21	82.2713	0.0411567	0.119895	0.0706076	0.653322
	AC241952.1			30.9158	0.0406748	0.121768	0.0709902	0.653322
	SEPTIN11	55752	septin 11	29.8372	0.0395413	0.125962	0.0722153	0.653322
	GLB1L2	89944	galactosidase beta 1 like 2	15.9936	0.0387877	0.130443	0.0724797	0.653322
	ZNF385D	79750	zinc finger protein 385D	42.2596	0.037178	0.147033	0.0707622	0.653322
	KALRN	8997	kalirin RhoGEF kinase	10.6497	0.0367419	0.145238	0.0726525	0.653322
	KCTD19	146212	potassium channel tetramerization domain containing 19	41.4459	0.0355995	0.156002	0.0710799	0.653322
	ANKRD18A	253650	ankyrin repeat domain 18A	23.4205	0.0334267	0.163199	0.0718673	0.653322
	CORO7-PAM16	100529144	CORO7-PAM16 readthrough	9.59696	0.0289203	0.168799	0.0725364	0.653322
	AP1M2	10053	adaptor related protein complex 1 subunit mu 2	10.8955	-0.0257261	0.168119	0.0724738	0.653322
	ABHD14A-ACY1	100526760	ABHD14A-ACY1 readthrough	7.59167	-0.0284017	0.169556	0.0714874	0.653322
	HPGD	3248	15-hydroxyprostaglandin dehydrogenase	11.8596	-0.0339375	0.160766	0.0724056	0.653322
	SMIM11A	54065	small integral membrane protein 11A	17.4673	-0.0359435	0.15477	0.0707987	0.653322
	UCHL1	7345	ubiquitin C-terminal hydrolase L1	25.5536	-0.0371307	0.146678	0.0710247	0.653322
	RAI14	26064	retinoic acid induced 14	23.6434	-0.0371697	0.143738	0.072031	0.653322
	PLEKHA3	65977	pleckstrin homology domain containing A3	16.4794	-0.03753	0.143552	0.0711011	0.653322
	ANOS1	3730	anosmin 1	23.9177	-0.0385258	0.135274	0.0713552	0.653322
	GDAP2	54834	ganglioside induced differentiation associated protein 2	26.8707	-0.0386372	0.133357	0.0717642	0.653322
	H2BP2			14.7262	-0.0386794	0.135107	0.0709868	0.653322
	SLC44A3-AS1	101928079	SLC44A3 antisense RNA 1	54.1542	-0.0424584	0.114093	0.0703576	0.653322
	SEPTIN14	346288	septin 14	89.6848	-0.0435531	0.107708	0.0717698	0.653322
	NBPF20	100288142	NBPF member 20	69.825	-0.0435893	0.10688	0.0722919	0.653322
	DHFR2	200895	dihydrofolate reductase 2	45.5269	-0.0465774	0.0972636	0.0726704	0.653322
	NDUFB5	4711	NADH:ubiquinone oxidoreductase subunit B5	134.05	-0.0469499	0.0968946	0.0720437	0.653322
	DNAJC16	23341	DnaJ heat shock protein family (Hsp40) member C16	106.337	-0.0470484	0.0970495	0.0716612	0.653322
	VMA21	203547	vacuolar ATPase assembly factor VMA21	127.642	-0.0472943	0.0959875	0.0719521	0.653322
	ASNS	440	asparagine synthetase (glutamine-hydrolyzing)	88.5786	-0.0478128	0.0956687	0.0709136	0.653322
	FASN	2194	fatty acid synthase	230.062	-0.0481097	0.0951664	0.0705879	0.653322
	RRAGD	58528	Ras related GTP binding D	184.462	-0.0494797	0.0892337	0.0717087	0.653322
	COQ8B	79934	coenzyme Q8B	120.654	-0.0497601	0.0868319	0.0726321	0.653322
	ZNF407	55628	zinc finger protein 407	97.9563	-0.0504376	0.0842727	0.0723172	0.653322
	MYLIP	29116	myosin regulatory light chain interacting protein	486.744	-0.0508444	0.0815457	0.0726008	0.653322
	ZNF200	7752	zinc finger protein 200	284.859	-0.0512763	0.0822242	0.0709737	0.653322
	TMEM65	157378	transmembrane protein 65	172.064	-0.0518706	0.0782045	0.0709033	0.653322
	ARF6	382	ADP ribosylation factor 6	829.822	-0.0521678	0.0575697	0.0721819	0.653322
	CLTC	1213	clathrin heavy chain	1211.77	-0.052351	0.0648811	0.0718654	0.653322
	TRAPPC6B	122553	trafficking protein particle complex 6B	54.1563	0.0399485	0.121138	0.0733209	0.655622
	IKBKGP1	246210	inhibitor of nuclear factor kappa B kinase subunit gamma pseudogene 1	63.6852	-0.0306785	0.167023	0.0732251	0.655622
	NEPRO	25871	nucleolus and neural progenitor protein	77.7527	-0.0490729	0.0885595	0.0733239	0.655622
	OPRL1	4987	opioid related nociceptin receptor 1	177.603	-0.0500446	0.0844688	0.073348	0.655622
	PKN2	5586	protein kinase N2	454.183	-0.0509957	0.0788491	0.0733916	0.655622
	ZNF383	163087	zinc finger protein 383	92.8731	0.0415172	0.113141	0.0734523	0.655735
	BASP1	10409	brain abundant membrane attached signal protein 1	4441.57	-0.0443381	0.102749	0.0736574	0.656878
	FXR1	8087	FMR1 autosomal homolog 1	274.682	-0.0516075	0.0717288	0.0736767	0.656878
	CDA	978	cytidine deaminase	1026.91	0.0503511	0.0820624	0.0738311	0.656965
	SMIM3	85027	small integral membrane protein 3	110.685	0.0472083	0.0940634	0.0738506	0.656965
	ZEB1	6935	zinc finger E-box binding homeobox 1	16.972	0.036872	0.141137	0.0738791	0.656965
	HCAR3	8843	hydroxycarboxylic acid receptor 3	950.851	-0.0424811	0.108797	0.0737934	0.656965
	UBXN10	127733	UBX domain protein 10	13.5049	0.0376293	0.135277	0.0739347	0.657032
	CA11	770	carbonic anhydrase 11	32.2709	0.0419332	0.110512	0.0740597	0.657714
	FAM126B	285172	family with sequence similarity 126 member B	1124.45	-0.0474849	0.0929215	0.0741112	0.657743
	SMG6	23293	SMG6 nonsense mediated mRNA decay factor	51.4501	-0.0436251	0.104359	0.074185	0.65797
	TRIM13	10206	tripartite motif containing 13	127.527	0.0468016	0.09472	0.074347	0.65855
	HS6ST1	9394	heparan sulfate 6-O-sulfotransferase 1	127.117	-0.0509968	0.07647	0.0743437	0.65855
	ANAPC16	119504	anaphase promoting complex subunit 16	547.286	0.0514384	0.0685619	0.0748965	0.658649
	CDK5RAP3	80279	CDK5 regulatory subunit associated protein 3	863.986	0.0511986	0.0589014	0.0763861	0.658649
	MGST3	4259	microsomal glutathione S-transferase 3	117.907	0.0506773	0.076441	0.0754213	0.658649
	GPS1	2873	G protein pathway suppressor 1	279.497	0.0499331	0.0821785	0.0750529	0.658649
	MAPKAPK5	8550	MAPK activated protein kinase 5	171.041	0.0497189	0.0807966	0.0765122	0.658649
	ZNF75A	7627	zinc finger protein 75a	110.023	0.0487142	0.0877446	0.074954	0.658649
	ECD	11319	ecdysoneless cell cycle regulator	134.456	0.0484812	0.0868587	0.0763094	0.658649
	ZNF605	100289635	zinc finger protein 605	123.494	0.048166	0.089626	0.0750275	0.658649
	RNF187	149603	ring finger protein 187	807.494	0.0480867	0.0880547	0.0765309	0.658649
	RASAL3	64926	RAS protein activator like 3	235.116	0.0479709	0.090213	0.0750905	0.658649
	BNIP3L	665	BCL2 interacting protein 3 like	3003.99	0.0475911	0.0901419	0.0762216	0.658649
	THOC2	57187	THO complex 2	172.988	0.0463446	0.0937923	0.0764322	0.658649
	FGFBP2	83888	fibroblast growth factor binding protein 2	277.983	0.0462851	0.0949588	0.0755144	0.658649
	MAST4	375449	microtubule associated serine/threonine kinase family member 4	82.5924	0.0436293	0.103344	0.0750236	0.658649
	SPINDOC	144097	spindlin interactor and repressor of chromatin binding	37.4698	0.0435497	0.10227	0.0761703	0.658649
	GFI1B	8328	growth factor independent 1B transcriptional repressor	132.462	0.0429869	0.104993	0.0753744	0.658649
	ITGB3	3690	integrin subunit beta 3	142.872	0.0427251	0.105529	0.0756485	0.658649
	KIF11	3832	kinesin family member 11	42.5376	0.0423606	0.106638	0.0757598	0.658649
	ATP13A2	23400	ATPase cation transporting 13A2	121.252	0.0420494	0.108639	0.0750848	0.658649
	DACT3	147906	dishevelled binding antagonist of beta catenin 3	35.2626	0.0387337	0.123367	0.0757711	0.658649
	SHCBP1	79801	SHC binding and spindle associated 1	36.7045	0.0379607	0.128708	0.0756477	0.658649
	ALOX12P2	245	arachidonate 12-lipoxygenase pseudogene 2	24.8322	0.0366943	0.136293	0.0763425	0.658649
	TRBV30	28557	T cell receptor beta variable 30 (gene/pseudogene)	8.89378	0.035674	0.146459	0.075199	0.658649
	CDRT4	284040	CMT1A duplicated region transcript 4	16.5331	0.0356663	0.143692	0.0764084	0.658649
	ERCC6L	54821	ERCC excision repair 6 like, spindle assembly checkpoint helicase	9.0186	0.0350083	0.152023	0.0745444	0.658649
	MREG	55686	melanoregulin	10.6956	-0.0307822	0.164213	0.0760598	0.658649
	NHSL1	57224	NHS like 1	20.1126	-0.0362438	0.140595	0.0759597	0.658649
	BCL7A	605	BAF chromatin remodeling complex subunit BCL7A	41.8166	-0.0395248	0.1186	0.0758884	0.658649
	ZNF703	80139	zinc finger protein 703	70.4085	-0.0397842	0.119304	0.0747443	0.658649
	SPATA6	54558	spermatogenesis associated 6	35.3832	-0.0406367	0.112926	0.0760674	0.658649
	KCNJ2	3759	potassium voltage-gated channel subfamily J member 2	894.21	-0.0432435	0.102896	0.0764552	0.658649
	CDKN1C	1028	cyclin dependent kinase inhibitor 1C	203.666	-0.0441439	0.102343	0.0745138	0.658649
	HIP1R	9026	huntingtin interacting protein 1 related	155.693	-0.0461922	0.0954654	0.075298	0.658649
	ASPRV1	151516	aspartic peptidase retroviral like 1	111.553	-0.0464127	0.0955601	0.0746221	0.658649
	MAP3K8	1326	mitogen-activated protein kinase kinase kinase 8	199.349	-0.0464937	0.0952402	0.0746973	0.658649
	CREB5	9586	cAMP responsive element binding protein 5	1423.2	-0.0465522	0.0953534	0.0744391	0.658649
	CXCR1	3577	C-X-C motif chemokine receptor 1	6734.57	-0.0475414	0.0904175	0.076126	0.658649
	SNX1	6642	sorting nexin 1	1009.53	-0.0476446	0.0904669	0.0757919	0.658649
	UBE2F	140739	ubiquitin conjugating enzyme E2 F (putative)	308.732	-0.0478279	0.0893843	0.0761874	0.658649
	PLA2G6	8398	phospholipase A2 group VI	147.556	-0.0488793	0.0852419	0.0763097	0.658649
	GHDC	84514	GH3 domain containing	121.395	-0.0490854	0.0853252	0.0756312	0.658649
	HNRNPA2B1	3181	heterogeneous nuclear ribonucleoprotein A2/B1	3223.33	-0.0496691	0.0430193	0.0764709	0.658649
	KDM5A	5927	lysine demethylase 5A	904.283	-0.05118	0.068703	0.0758314	0.658649
	GMIP	51291	GEM interacting protein	2409.06	-0.051264	0.0717869	0.0748716	0.658649
	SHOC2	8036	SHOC2 leucine rich repeat scaffold protein	611.051	-0.0513937	0.0661098	0.0753967	0.658649
	PLCD3	113026	phospholipase C delta 3	46.869	-0.0430037	0.103335	0.0767312	0.65981
	ZGPAT	84619	zinc finger CCCH-type and G-patch domain containing	157.97	-0.0453618	0.0963065	0.0767626	0.65981
	ABCC13	150000	ATP binding cassette subfamily C member 13 (pseudogene)	66.0964	0.0429799	0.103275	0.0768501	0.660146
	TUBA4A	7277	tubulin alpha 4a	1249.76	0.0500388	0.0768563	0.0774161	0.660336
	VPS4A	27183	vacuolar protein sorting 4 homolog A	130.724	0.0495704	0.0801466	0.0773551	0.660336
	TRBC2	28638	T cell receptor beta constant 2	1219.91	0.0491608	0.0826048	0.0772148	0.660336
	COX19	90639	cytochrome c oxidase assembly factor COX19	157.76	0.0490238	0.0833893	0.077137	0.660336
	AL390879.1			22.8214	0.0415265	0.107499	0.0774237	0.660336
	EPAS1	2034	endothelial PAS domain protein 1	31.4057	0.0398497	0.114505	0.0773534	0.660336
	CLDND2	125875	claudin domain containing 2	24.5291	0.0392917	0.117125	0.077428	0.660336
	ADTRP	84830	androgen dependent TFPI regulating protein	23.6961	0.0369409	0.131997	0.077375	0.660336
	KIAA0586	9786	KIAA0586	115.647	-0.0488224	0.0842823	0.0771576	0.660336
	MBD6	114785	methyl-CpG binding domain protein 6	1275.21	-0.0506378	0.0720274	0.0770534	0.660336
	SAMD8	142891	sterile alpha motif domain containing 8	267.086	-0.0508452	0.0694636	0.0769319	0.660336
	STK17B	9262	serine/threonine kinase 17b	1815	-0.0509151	0.0569366	0.0774531	0.660336
	SYAP1	94056	synapse associated protein 1	286.46	0.0494095	0.0806485	0.0775993	0.660774
	MSTO1	55154	misato mitochondrial distribution and morphology regulator 1	81.5734	0.0447146	0.0972916	0.0776014	0.660774
	CLPX	10845	caseinolytic mitochondrial matrix peptidase chaperone subunit	284.071	0.049703	0.0785329	0.0777659	0.660828
	HMBS	3145	hydroxymethylbilane synthase	168.268	0.0450322	0.0961391	0.0778336	0.660828
	RBM38	55544	RNA binding motif protein 38	67.9	0.0402396	0.112104	0.0777802	0.660828
	AC240274.1			47.5878	-0.0438412	0.0995627	0.0778499	0.660828
	SKIL	6498	SKI like proto-oncogene	242.066	-0.047785	0.0876601	0.0777436	0.660828
	ADHFE1	137872	alcohol dehydrogenase iron containing 1	40.3396	0.0397671	0.113891	0.0779951	0.661649
	TMEM63C	57156	transmembrane protein 63C	46.7891	0.039172	0.116564	0.0781256	0.662344
	FOXK2	3607	forkhead box K2	42.2363	0.0392651	0.115918	0.0782343	0.662442
	DCBLD2	131566	discoidin, CUB and LCCL domain containing 2	7.99115	0.0362983	0.13475	0.0782273	0.662442
	CS	1431	citrate synthase	627.718	0.0505755	0.0557684	0.0788419	0.662646
	ETFA	2108	electron transfer flavoprotein subunit alpha	150.074	0.0501994	0.0718242	0.0787229	0.662646
	TMEM63A	9725	transmembrane protein 63A	601.426	0.0486665	0.0829779	0.0785444	0.662646
	GIMAP5	55340	GTPase, IMAP family member 5	842.877	0.0481881	0.0853657	0.0783337	0.662646
	RPS4X	6191	ribosomal protein S4 X-linked	443.038	0.0480385	0.0856208	0.0786014	0.662646
	PER2	8864	period circadian regulator 2	83.3937	0.0471828	0.0889236	0.0784635	0.662646
	RSRC1	51319	arginine and serine rich coiled-coil 1	73.9703	0.046984	0.0893911	0.0786397	0.662646
	GZMH	2999	granzyme H	390.093	0.0466319	0.0903381	0.0788196	0.662646
	LCK	3932	LCK proto-oncogene, Src family tyrosine kinase	102.949	0.0442616	0.097723	0.0784456	0.662646
	PEAR1	375033	platelet endothelial aggregation receptor 1	29.3976	0.0384197	0.119256	0.0788899	0.662646
	GSTZ1	2954	glutathione S-transferase zeta 1	19.8692	-0.0359126	0.136217	0.0788291	0.662646
	NAIPP1			119.111	-0.0375537	0.124595	0.0788233	0.662646
	ARHGAP30	257106	Rho GTPase activating protein 30	4521.96	-0.0502164	0.0722147	0.0785384	0.662646
	PCGF5	84333	polycomb group ring finger 5	1523.12	0.046991	0.0889968	0.07897	0.662911
	FBXO9	26268	F-box protein 9	517.816	0.0476322	0.0864761	0.0791772	0.663682
	FMC1-LUC7L2	100996928	FMC1-LUC7L2 readthrough	33.3241	0.0180692	0.156986	0.0791165	0.663682
	CUL3	8452	cullin 3	574.32	-0.0498018	0.0745727	0.0792078	0.663682
	AKIP1	56672	A-kinase interacting protein 1	36.0461	0.0441522	0.0971229	0.079345	0.664423
	NPIPB12	440353	nuclear pore complex interacting protein family, member B12	738.978	0.0499632	0.0723134	0.079444	0.664437
	SHFL	55337	shiftless antiviral inhibitor of ribosomal frameshifting	276.655	0.0496712	0.0751978	0.0794205	0.664437
	SYTL2	54843	synaptotagmin like 2	354.867	0.0456516	0.0924764	0.0796533	0.665779
	TP53	7157	tumor protein p53	348.447	0.0497781	0.0725476	0.0800539	0.666222
	OSGEP	55644	O-sialoglycoprotein endopeptidase	215.741	0.0486531	0.0806671	0.080097	0.666222
	RAD54L2	23132	RAD54 like 2	168.505	0.0481357	0.0832498	0.0800676	0.666222
	TCEAL8	90843	transcription elongation factor A like 8	49.5591	0.0424288	0.101463	0.0800575	0.666222
	ZNF500	26048	zinc finger protein 500	26.7305	0.0358018	0.134634	0.0798798	0.666222
	TNFSF13B	10673	TNF superfamily member 13b	1177.98	-0.0415471	0.104447	0.0799044	0.666222
	CCNC	892	cyclin C	95.0819	-0.0457112	0.0918655	0.0800766	0.666222
	ALDH9A1	223	aldehyde dehydrogenase 9 family member A1	339.473	-0.0478503	0.084771	0.0798489	0.666222
	CCNI	10983	cyclin I	3407.01	0.0497638	0.0718113	0.0803603	0.666617
	MAP2K2	5605	mitogen-activated protein kinase kinase 2	1355.74	0.0496784	0.0713273	0.0808455	0.666617
	EIF2B4	8890	eukaryotic translation initiation factor 2B subunit delta	125.657	0.0482014	0.0825693	0.0803371	0.666617
	ATP5PO	539	ATP synthase peripheral stalk subunit OSCP	161.069	0.0481893	0.0818488	0.0808776	0.666617
	CENPT	80152	centromere protein T	193.093	0.0479415	0.083232	0.0807149	0.666617
	TST	7263	thiosulfate sulfurtransferase	130.97	0.0464262	0.0887988	0.0808587	0.666617
	TCF19	6941	transcription factor 19	53.1984	0.0434372	0.0978333	0.0806901	0.666617
	PPP1R12B	4660	protein phosphatase 1 regulatory subunit 12B	658.598	0.0409799	0.105608	0.0805768	0.666617
	TPH1	7166	tryptophan hydroxylase 1	6.72888	0.0327792	0.152883	0.0803344	0.666617
	SSPN	8082	sarcospan	13.1607	-0.0344147	0.142598	0.0808046	0.666617
	NANOG	79923	Nanog homeobox	28.8278	-0.0357409	0.132954	0.0808334	0.666617
	ECHDC3	79746	enoyl-CoA hydratase domain containing 3	50.5986	-0.0413363	0.104366	0.0805986	0.666617
	RNF138	51444	ring finger protein 138	231.018	-0.0467603	0.0881362	0.0804375	0.666617
	TUT7	79670	terminal uridylyl transferase 7	880.439	-0.0491033	0.0775156	0.0803499	0.666617
	VPS13B	157680	vacuolar protein sorting 13 homolog B	289.231	-0.0496099	0.0721224	0.0808366	0.666617
	CDK5RAP2	55755	CDK5 regulatory subunit associated protein 2	454.086	-0.035245	0.135982	0.0811157	0.667773
	ATR	545	ATR serine/threonine kinase	163.534	-0.0468926	0.0869383	0.0810888	0.667773
	NTAN1	123803	N-terminal asparagine amidase	162.804	0.0476009	0.0839691	0.0812735	0.668668
	VIL1	7429	villin 1	20.3463	0.0358797	0.130781	0.0813667	0.669032
	SPATS2L	26010	spermatogenesis associated serine rich 2 like	88.287	-0.0409194	0.104848	0.0814217	0.66908
	BLVRB	645	biliverdin reductase B	1841.08	0.0440455	0.0952741	0.081531	0.669197
	VIPR1	7433	vasoactive intestinal peptide receptor 1	139.024	0.0417377	0.101896	0.0816812	0.669197
	RAP1GAP	5909	RAP1 GTPase activating protein	243.79	0.0379497	0.117145	0.0816352	0.669197
	ZNF616	90317	zinc finger protein 616	49.2774	-0.0402055	0.107117	0.0816539	0.669197
	F8A3	474384	coagulation factor VIII associated 3	121.05	-0.0433132	0.0972926	0.0816041	0.669197
	LBH	81606	LBH regulator of WNT signaling pathway	803.819	0.0461191	0.0887939	0.0818103	0.669252
	TMCC2	9911	transmembrane and coiled-coil domain family 2	458.232	0.0423561	0.0998539	0.0818351	0.669252
	SOCS3	9021	suppressor of cytokine signaling 3	790.493	-0.0369151	0.122809	0.0818275	0.669252
	SNN	8303	stannin	1340.49	-0.0497948	0.064926	0.0819785	0.670023
	STING1			538.149	0.0476228	0.0819562	0.0827164	0.670127
	CINP	51550	cyclin dependent kinase 2 interacting protein	71.3071	0.0437872	0.0949984	0.0825884	0.670127
	PER1	5187	period circadian regulator 1	191.91	0.0420841	0.0999508	0.0825514	0.670127
	SLC25A26	115286	solute carrier family 25 member 26	36.1037	0.0376583	0.117566	0.0823363	0.670127
	EMILIN1	11117	elastin microfibril interfacer 1	7.61668	0.0329444	0.149186	0.0820608	0.670127
	COPS2	9318	COP9 signalosome subunit 2	17.4461	-0.0274455	0.162717	0.0828264	0.670127
	C11orf49	79096	chromosome 11 open reading frame 49	30.4165	-0.0378489	0.116125	0.0826052	0.670127
	MTHFD2	10797	methylenetetrahydrofolate dehydrogenase (NADP+ dependent) 2, methenyltetrahydrofolate cyclohydrolase	207.97	-0.0435535	0.0961149	0.0821137	0.670127
	DIMT1	27292	DIMT1 rRNA methyltransferase and ribosome maturation factor	60.7512	-0.0446381	0.0926732	0.0824658	0.670127
	C4orf3	401152	chromosome 4 open reading frame 3	833.582	-0.0448736	0.0921147	0.0823303	0.670127
	SOS1	6654	SOS Ras/Rac guanine nucleotide exchange factor 1	253.526	-0.0457372	0.0895884	0.0822285	0.670127
	DUSP1	1843	dual specificity phosphatase 1	2190.83	-0.0462674	0.0875418	0.0825193	0.670127
	TBKBP1	9755	TBK1 binding protein 1	363.024	-0.0477848	0.0812451	0.0826704	0.670127
	TRAF3	7187	TNF receptor associated factor 3	240.205	-0.0479606	0.0807051	0.0824358	0.670127
	GPAT4	137964	glycerol-3-phosphate acyltransferase 4	409.431	-0.0485052	0.0770409	0.0827442	0.670127
	PPP1CB	5500	protein phosphatase 1 catalytic subunit beta	647.29	-0.0487128	0.0754337	0.0828143	0.670127
	HSPA5	3309	heat shock protein family A (Hsp70) member 5	1384.6	-0.0498395	0.0555387	0.0822522	0.670127
	TSPOAP1	9256	TSPO associated protein 1	101.297	0.0406665	0.10405	0.0829142	0.67044
	TRIM27	5987	tripartite motif containing 27	801.063	-0.0491432	0.0707008	0.0831422	0.671885
	CCND3	896	cyclin D3	2034.09	0.0492619	0.0681	0.0834764	0.672991
	REV1	51455	REV1 DNA directed polymerase	118.233	0.0428425	0.0968571	0.083467	0.672991
	IFT81	28981	intraflagellar transport 81	9.35086	-0.0339736	0.140164	0.0834435	0.672991
	PRKD2	25865	protein kinase D2	1146.9	-0.0487209	0.0741309	0.083403	0.672991
	FCGR3B	2215	Fc fragment of IgG receptor IIIb	23807.1	-0.0469338	0.0839141	0.0835282	0.673011
	OCIAD2	132299	OCIA domain containing 2	47.2968	0.0418739	0.0994889	0.0836587	0.673267
	ZC3H11A	9877	zinc finger CCCH-type containing 11A	1120.54	-0.0495551	0.060145	0.083615	0.673267
	DGAT1	8694	diacylglycerol O-acyltransferase 1	437.35	0.0488766	0.0710524	0.084075	0.673764
	CSE1L	1434	chromosome segregation 1 like	212.301	0.0477543	0.0792709	0.08412	0.673764
	STAB1	23166	stabilin 1	157.251	0.044286	0.0923274	0.0839075	0.673764
	FAM156B	727866	family with sequence similarity 156 member B	57.1661	0.0356364	0.127274	0.0838999	0.673764
	SSH1	54434	slingshot protein phosphatase 1	42.3899	-0.0365585	0.121095	0.0839841	0.673764
	IGF2BP3	10643	insulin like growth factor 2 mRNA binding protein 3	93.4846	-0.038598	0.110609	0.0839847	0.673764
	BCL6	604	BCL6 transcription repressor	5791.25	-0.0438471	0.0933836	0.0841306	0.673764
	B3GALT4	8705	beta-1,3-galactosyltransferase 4	139.012	-0.0458397	0.0872535	0.0841649	0.673764
	PTGER2	5732	prostaglandin E receptor 2	158.345	-0.0480853	0.0774527	0.0840473	0.673764
	CST3	1471	cystatin C	3163.1	0.0491803	0.065461	0.084481	0.673935
	RCSD1	92241	RCSD domain containing 1	1544.17	0.0491649	0.0659134	0.0844436	0.673935
	CORO1C	23603	coronin 1C	912.603	0.0490402	0.0674598	0.084574	0.673935
	APEX1	328	apurinic/apyrimidinic endodeoxyribonuclease 1	379.394	0.0479924	0.0770631	0.0846191	0.673935
	CCDC88C	440193	coiled-coil domain containing 88C	312.892	0.0475322	0.0800819	0.0843678	0.673935
	GTF2IRD2B	389524	GTF2I repeat domain containing 2B	146.257	0.0450185	0.0894862	0.0845898	0.673935
	WASH4P	374677	WASP family homolog 4, pseudogene	8.63363	0.0303923	0.15604	0.0846842	0.673935
	GDA	9615	guanine deaminase	9.41295	0.0273462	0.161678	0.0845444	0.673935
	ZNF135	7694	zinc finger protein 135	6.9536	-0.0334066	0.141836	0.0845414	0.673935
	EIF5A2	56648	eukaryotic translation initiation factor 5A2	38.8627	-0.0397041	0.105471	0.0846536	0.673935
	ZNF524	147807	zinc finger protein 524	147.635	-0.0472428	0.0810128	0.0847298	0.673935
	SOD1	6647	superoxide dismutase 1	6.87878	0.0326389	0.146111	0.0848155	0.674224
	PPFIA1	8500	PTPRF interacting protein alpha 1	206.796	0.0424455	0.0963981	0.0851819	0.674525
	TP53INP2	58476	tumor protein p53 inducible nuclear protein 2	136.392	0.0400729	0.10357	0.0852306	0.674525
	NPIPB15	440348	nuclear pore complex interacting protein family member B15	18.1245	0.0363468	0.120215	0.0852313	0.674525
	UQCRFS1P1	100128525	ubiquinol-cytochrome c reductase, Rieske iron-sulfur polypeptide 1 pseudogene 1	9.43174	0.0335247	0.139657	0.085249	0.674525
	ZNF287	57336	zinc finger protein 287	23.4031	0.0333558	0.141282	0.0850036	0.674525
	AFF4	27125	AF4/FMR2 family member 4	10.4439	0.0324192	0.146865	0.0851042	0.674525
	MTMR9	66036	myotubularin related protein 9	147.63	-0.0423219	0.0969936	0.0849175	0.674525
	RAB11FIP1	80223	RAB11 family interacting protein 1	2469.06	-0.0492754	0.0552852	0.0849626	0.674525
	FAM104A	84923	family with sequence similarity 104 member A	612.125	0.0474615	0.0788776	0.085444	0.674893
	CPLANE1	65250	ciliogenesis and planar polarity effector 1	38.7973	-0.0387871	0.108027	0.0854258	0.674893
	SGPP1	81537	sphingosine-1-phosphate phosphatase 1	103.688	-0.0455253	0.0870053	0.085436	0.674893
	ADAMTS7P1	390660	ADAMTS7 pseudogene 1	10.8389	0.0335307	0.138718	0.0857057	0.676569
	DNAAF2	55172	dynein axonemal assembly factor 2	10.6698	0.0241884	0.161753	0.0858371	0.677214
	PHF12	57649	PHD finger protein 12	994.393	-0.0489415	0.0632295	0.0859867	0.678003
	ZNF471	57573	zinc finger protein 471	17.4947	0.032392	0.145243	0.0861505	0.678118
	KCTD13	253980	potassium channel tetramerization domain containing 13	190.322	-0.0476478	0.0767043	0.0861273	0.678118
	KAT7	11143	lysine acetyltransferase 7	411.655	-0.0488864	0.0638502	0.0861109	0.678118
	AC087721.2			45.054	0.0413199	0.0986543	0.0862647	0.678409
	GAL3ST4	79690	galactose-3-O-sulfotransferase 4	33.754	0.0406912	0.100525	0.0862869	0.678409
	RABEPK	10244	Rab9 effector protein with kelch motifs	68.1353	0.0413985	0.0980491	0.0866722	0.679105
	LINC01347	731275	long intergenic non-protein coding RNA 1347	33.5185	0.0394469	0.10419	0.0866742	0.679105
	SERPING1	710	serpin family G member 1	814.773	0.0354819	0.123123	0.086658	0.679105
	CDHR4	389118	cadherin related family member 4	16.1086	0.0346182	0.129065	0.0866352	0.679105
	MTAP	4507	methylthioadenosine phosphorylase	106.652	-0.0459122	0.0844524	0.0865432	0.679105
	SMAP2	64744	small ArfGAP2	6229.2	-0.047361	0.0776519	0.0866235	0.679105
	HM13	81502	histocompatibility minor 13	1020.18	0.0485329	0.0670834	0.0868403	0.679505
	RPS26	6231	ribosomal protein S26	713.2	0.0482587	0.0685866	0.0875222	0.679505
	GPX1	2876	glutathione peroxidase 1	4737.08	0.0467301	0.0798144	0.0874773	0.679505
	KIAA2026	158358	KIAA2026	262.833	0.0465458	0.0809272	0.0872991	0.679505
	IGFBP4	3487	insulin like growth factor binding protein 4	27.7874	0.0398869	0.102097	0.0872817	0.679505
	EPHX2	2053	epoxide hydrolase 2	69.8952	0.0384361	0.107231	0.0872836	0.679505
	GPR34	2857	G protein-coupled receptor 34	21.1319	0.0371504	0.112625	0.0873957	0.679505
	CCNB2	9133	cyclin B2	16.6639	0.0356585	0.121222	0.0871059	0.679505
	AC068631.2			13.6021	0.0267517	0.160616	0.0869857	0.679505
	SLC39A6	25800	solute carrier family 39 member 6	7.18555	0.026351	0.161011	0.0867914	0.679505
	MEX3D	399664	mex-3 RNA binding family member D	18.0158	-0.0378388	0.109487	0.0874285	0.679505
	CADM4	199731	cell adhesion molecule 4	29.1504	-0.0380708	0.108452	0.0874858	0.679505
	SLAMF7	57823	SLAM family member 7	389.889	-0.0440027	0.0900988	0.0872256	0.679505
	HDGFL2	84717	HDGF like 2	247.312	-0.0441752	0.089598	0.0872068	0.679505
	ACTL6A	86	actin like 6A	122.552	-0.0463513	0.0818958	0.0872205	0.679505
	NFKB1	4790	nuclear factor kappa B subunit 1	582.279	-0.0476624	0.0753038	0.0868851	0.679505
	PSMB2	5690	proteasome subunit beta 2	336.22	0.048646	0.0618605	0.0875806	0.679572
	PSKH1	5681	protein serine kinase H1	200.487	0.0474402	0.0749935	0.0879347	0.679613
	EIF2D	1939	eukaryotic translation initiation factor 2D	151.646	0.0465782	0.0801536	0.0877827	0.679613
	RBBP6	5930	RB binding protein 6, ubiquitin ligase	90.5572	0.0434475	0.0911576	0.0878656	0.679613
	FCAR	2204	Fc fragment of IgA receptor	661.628	0.0425782	0.0936685	0.0878282	0.679613
	INAVA	55765	innate immunity activator	55.3057	0.0355285	0.120668	0.0879107	0.679613
	ISYNA1	51477	inositol-3-phosphate synthase 1	67.173	-0.0398838	0.101685	0.0877123	0.679613
	ZYX	7791	zyxin	256.949	-0.0446363	0.0877383	0.0876624	0.679613
	ABI3	51225	ABI family member 3	380.925	0.0479831	0.0692511	0.0884514	0.680406
	ITPA	3704	inosine triphosphatase	106.642	0.045259	0.0850552	0.0882464	0.680406
	CACNB4	785	calcium voltage-gated channel auxiliary subunit beta 4	72.1492	0.0352853	0.120917	0.0886636	0.680406
	ITGAV	3685	integrin subunit alpha V	54.522	-0.0396567	0.101829	0.088317	0.680406
	PGS1	9489	phosphatidylglycerophosphate synthase 1	609.232	-0.0421633	0.0942076	0.0885562	0.680406
	C1QTNF6	114904	C1q and TNF related 6	44.9107	-0.0429842	0.0921283	0.0882781	0.680406
	C18orf25	147339	chromosome 18 open reading frame 25	273.831	-0.0442497	0.0880879	0.0885984	0.680406
	AASDHPPT	60496	aminoadipate-semialdehyde dehydrogenase-phosphopantetheinyl transferase	123.981	-0.0447923	0.0867957	0.0881145	0.680406
	ENC1	8507	ectodermal-neural cortex 1	146.105	-0.0459212	0.0820068	0.0886858	0.680406
	SELL	6402	selectin L	14524.8	-0.0461402	0.0812864	0.0884936	0.680406
	TLNRD1	59274	talin rod domain containing 1	260.343	-0.0464977	0.0799377	0.0882482	0.680406
	TMEM250	90120	transmembrane protein 250	418.372	-0.0468247	0.0779786	0.0884457	0.680406
	AXIN1	8312	axin 1	465.191	-0.047826	0.0708492	0.0884537	0.680406
	NAP1L4	4676	nucleosome assembly protein 1 like 4	533.056	0.0481116	0.0664428	0.0888833	0.680773
	KCNB1	3745	potassium voltage-gated channel subfamily B member 1	31.3649	0.0377785	0.108007	0.0888806	0.680773
	FAR1	84188	fatty acyl-CoA reductase 1	638.798	-0.0477578	0.0707222	0.0887961	0.680773
	NEU1	4758	neuraminidase 1	286.166	-0.0478232	0.0695781	0.0890051	0.681323
	NDUFS7	374291	NADH:ubiquinone oxidoreductase core subunit S7	77.4381	0.0393642	0.102001	0.0891213	0.681831
	TAZ	6901	tafazzin	314.845	0.0476397	0.0707481	0.0892837	0.682023
	MFSD2A	84879	major facilitator superfamily domain containing 2A	28.7902	0.0350201	0.121561	0.0892741	0.682023
	UGGT1	56886	UDP-glucose glycoprotein glucosyltransferase 1	18.4467	0.0320889	0.141607	0.0893429	0.682023
	RASA2	5922	RAS p21 protein activator 2	372.437	-0.0475579	0.071361	0.0893465	0.682023
	TAGLN	6876	transgelin	129.699	-0.0392836	0.101854	0.0895475	0.683175
	RPLP0	6175	ribosomal protein lateral stalk subunit P0	3170.33	0.0481712	0.062669	0.0896341	0.683297
	RPL37	6167	ribosomal protein L37	988.71	0.0478886	0.0633785	0.0907889	0.683297
	TPCN2	219931	two pore segment channel 2	226.704	0.0467839	0.0749449	0.0906022	0.683297
	CIZ1	25792	CDKN1A interacting zinc finger protein 1	200.095	0.0464779	0.0773613	0.0902269	0.683297
	POLR2L	5441	RNA polymerase II subunit L	196.387	0.0456487	0.0816721	0.0899823	0.683297
	GALT	2592	galactose-1-phosphate uridylyltransferase	162.462	0.04447	0.0856038	0.0904796	0.683297
	PEX13	5194	peroxisomal biogenesis factor 13	93.3361	0.0431296	0.0897507	0.0905497	0.683297
	PRR11	55771	proline rich 11	71.8117	0.0409566	0.0962588	0.0901476	0.683297
	BAG3	9531	BCL2 associated athanogene 3	55.1008	0.0407368	0.096278	0.0908649	0.683297
	NET1	10276	neuroepithelial cell transforming 1	41.1798	0.038587	0.102825	0.090945	0.683297
	MYBL2	4605	MYB proto-oncogene like 2	76.0704	0.0378421	0.106332	0.0901503	0.683297
	CHI3L2	1117	chitinase 3 like 2	65.6295	0.0374143	0.107776	0.0903756	0.683297
	WEE1	7465	WEE1 G2 checkpoint kinase	40.7328	0.0360924	0.11331	0.0907273	0.683297
	SV2A	9900	synaptic vesicle glycoprotein 2A	29.7129	0.0360878	0.114665	0.0897571	0.683297
	LAIR2	3904	leukocyte associated immunoglobulin like receptor 2	10.7947	0.0346458	0.121198	0.0909264	0.683297
	SLC7A3	84889	solute carrier family 7 member 3	10.4816	-0.0231358	0.159706	0.0903119	0.683297
	TIFA	92610	TRAF interacting protein with forkhead associated domain	251.871	-0.0367342	0.11071	0.0903688	0.683297
	KMO	8564	kynurenine 3-monooxygenase	43.0832	-0.0376887	0.105989	0.0910161	0.683297
	PORCN	64840	porcupine O-acyltransferase	33.1909	-0.0380624	0.1058	0.0898665	0.683297
	LHFPL2	10184	LHFPL tetraspan subfamily member 2	185.11	-0.0384305	0.103311	0.0909976	0.683297
	C17orf80	55028	chromosome 17 open reading frame 80	57.8897	-0.0398641	0.0989416	0.0907388	0.683297
	KLHL2	11275	kelch like family member 2	154.836	-0.0417734	0.0936157	0.090551	0.683297
	SERPINA1	5265	serpin family A member 1	10952.4	-0.0437365	0.0885604	0.0898302	0.683297
	KPNA1	3836	karyopherin subunit alpha 1	148.329	-0.0450104	0.083784	0.0903723	0.683297
	SLC22A18	5002	solute carrier family 22 member 18	247.828	-0.0451896	0.0825813	0.0908634	0.683297
	SLC12A9	56996	solute carrier family 12 member 9	2064.01	-0.0454792	0.0819562	0.0903605	0.683297
	XPO6	23214	exportin 6	6283.59	-0.0456217	0.0813818	0.0903378	0.683297
	RALGPS2	55103	Ral GEF with PH domain and SH3 binding motif 2	218.383	-0.0461452	0.0797593	0.0897156	0.683297
	TFEB	7942	transcription factor EB	636.77	-0.0466381	0.0763438	0.0902904	0.683297
	LPP	4026	LIM domain containing preferred translocation partner in lipoma	494.462	0.0471962	0.0708834	0.0911155	0.683667
	AC092933.1			27.0517	0.0326506	0.13452	0.0912025	0.683944
	LAT	27040	linker for activation of T cells	465.944	0.0457844	0.0794612	0.0913421	0.684614
	CD4	920	CD4 molecule	1260.12	0.0456023	0.0801782	0.0914493	0.685041
	TMSB10	9168	thymosin beta 10	3378.42	0.0474261	0.0675635	0.0915552	0.685082
	TNIK	23043	TRAF2 and NCK interacting kinase	183.954	0.0407445	0.0956859	0.0915454	0.685082
	MTRNR2L8	100463486	MT-RNR2 like 8	3714.04	0.0470382	0.071097	0.0916918	0.685352
	CHMP1A	5119	charged multivesicular body protein 1A	791.437	-0.0468147	0.072897	0.0916872	0.685352
	C8orf82	414919	chromosome 8 open reading frame 82	70.1511	-0.0419611	0.0920428	0.0918184	0.685923
	RAD18	56852	RAD18 E3 ubiquitin protein ligase	46.5196	-0.0368143	0.108244	0.0921516	0.688035
	COPS7B	64708	COP9 signalosome subunit 7B	150.574	0.0450944	0.081435	0.0922874	0.688233
	SPNS1	83985	sphingolipid transporter 1 (putative)	98.8899	0.040153	0.0967822	0.0922615	0.688233
	KIR2DL4	3805	killer cell immunoglobulin like receptor, two Ig domains and long cytoplasmic tail 4	6.66736	0.0302278	0.147308	0.0923294	0.688233
	MAMDC4	158056	MAM domain containing 4	20.4014	0.0345784	0.119259	0.0924129	0.688479
	CDK2	1017	cyclin dependent kinase 2	85.3375	0.0405467	0.0954457	0.0925163	0.688779
	LY6G6F	259215	lymphocyte antigen 6 family member G6F	29.6697	0.0339331	0.123134	0.0925542	0.688779
	TMBIM1	64114	transmembrane BAX inhibitor motif containing 1	1318.04	0.0475885	0.061563	0.0926854	0.689004
	ORC1	4998	origin recognition complex subunit 1	17.5464	0.0340119	0.122423	0.0926709	0.689004
	PLEC	5339	plectin	2083.89	-0.0470588	0.0685451	0.0928039	0.689509
	C21orf58	54058	chromosome 21 open reading frame 58	24.2422	0.0358601	0.111621	0.0929124	0.689935
	MANEA	79694	mannosidase endo-alpha	49.389	-0.0404973	0.0951804	0.0930131	0.689935
	LILRB4	11006	leukocyte immunoglobulin like receptor B4	285.181	-0.0441535	0.084334	0.0929677	0.689935
	RUNDC1	146923	RUN domain containing 1	316.887	0.0474996	0.0605448	0.0933598	0.691974
	AL365475.1			7.42265	0.0325826	0.131013	0.0934352	0.691974
	DSCC1	79075	DNA replication and sister chromatid cohesion 1	15.6169	0.0314048	0.1391	0.0934401	0.691974
	HLTF	6596	helicase like transcription factor	29.4918	0.030734	0.143034	0.0935171	0.692021
	DSP	1832	desmoplakin	27.6888	-0.0324041	0.132085	0.0935479	0.692021
	LRRC49	54839	leucine rich repeat containing 49	18.8729	-0.0304128	0.144595	0.093648	0.692386
	NUDT16	131870	nudix hydrolase 16	451.948	-0.0438996	0.0845243	0.093712	0.692484
	AHR	196	aryl hydrocarbon receptor	224.696	0.0443148	0.0829421	0.0938047	0.69259
	GGT5	2687	gamma-glutamyltransferase 5	16.0162	0.0342351	0.119187	0.093828	0.69259
	NAPRT	93100	nicotinate phosphoribosyltransferase	543.598	0.0465396	0.0707034	0.0940839	0.69298
	PSME4	23198	proteasome activator subunit 4	434.969	0.0458291	0.0757045	0.0940424	0.69298
	LRG1	116844	leucine rich alpha-2-glycoprotein 1	1358.5	-0.0399943	0.0957944	0.0940195	0.69298
	ZNF148	7707	zinc finger protein 148	396.962	-0.0472254	0.0631533	0.0940278	0.69298
	RUFY1	80230	RUN and FYVE domain containing 1	496.142	0.0472697	0.056282	0.0952708	0.693251
	TNFAIP8L2	79626	TNF alpha induced protein 8 like 2	409.263	0.0469983	0.0619422	0.095512	0.693251
	LPIN2	9663	lipin 2	948.83	0.0469962	0.0621478	0.0954619	0.693251
	RPL7L1	285855	ribosomal protein L7 like 1	543.394	0.0469409	0.0634273	0.0953332	0.693251
	NDUFA11	126328	NADH:ubiquinone oxidoreductase subunit A11	317.76	0.0469092	0.0656871	0.0946763	0.693251
	SERF2	10169	small EDRK-rich factor 2	2864.23	0.0464584	0.0698948	0.0948728	0.693251
	GOLGB1	2804	golgin B1	405.38	0.0455531	0.0752792	0.0955175	0.693251
	MRPL38	64978	mitochondrial ribosomal protein L38	161.114	0.0454058	0.0762958	0.0953825	0.693251
	TDP1	55775	tyrosyl-DNA phosphodiesterase 1	85.4663	0.0442073	0.082751	0.0944125	0.693251
	GOLGA8N	643699	golgin A8 family member N	136.577	0.0434138	0.0855793	0.0943568	0.693251
	MICOS13	125988	mitochondrial contact site and cristae organizing system subunit 13	69.0786	0.0421257	0.0892351	0.0947095	0.693251
	PAQR8	85315	progestin and adipoQ receptor family member 8	119.845	0.0419314	0.0891726	0.0954951	0.693251
	MLC1	23209	modulator of VRAC current 1	112.39	0.0410642	0.0923487	0.0945764	0.693251
	CASS4	57091	Cas scaffold protein family member 4	351.928	0.0402494	0.0940784	0.095275	0.693251
	ZNF721	170960	zinc finger protein 721	93.8965	0.0375645	0.102587	0.0948832	0.693251
	GPX7	2882	glutathione peroxidase 7	27.4392	0.0366078	0.106152	0.0948553	0.693251
	ZSCAN5A	79149	zinc finger and SCAN domain containing 5A	20.4579	0.0361217	0.108629	0.0944286	0.693251
	GTF2H2C	728340	GTF2H2 family member C	37.0123	0.035816	0.110191	0.0942585	0.693251
	EMC3-AS1	442075	EMC3 antisense RNA 1	29.7727	0.0329798	0.126514	0.0944107	0.693251
	ZIC5	85416	Zic family member 5	10.4934	-0.0277616	0.153553	0.094559	0.693251
	PYCR3	65263	pyrroline-5-carboxylate reductase 3	9.52791	-0.0281619	0.15183	0.0952764	0.693251
	FAAH2	158584	fatty acid amide hydrolase 2	8.88996	-0.0301646	0.143674	0.0952523	0.693251
	VAMP8	8673	vesicle associated membrane protein 8	10.0606	-0.0319822	0.132122	0.0952579	0.693251
	EXOSC4	54512	exosome component 4	62.9394	-0.0378707	0.101269	0.0951918	0.693251
	UBXN4	23190	UBX domain protein 4	104.336	-0.0392709	0.0970375	0.0950654	0.693251
	ZDHHC20	253832	zinc finger DHHC-type containing 20	555.366	-0.0437489	0.0834417	0.0954543	0.693251
	SRI	6717	sorcin	230.388	-0.0445258	0.0803343	0.0955437	0.693251
	TLR7	51284	toll like receptor 7	143.697	-0.0450765	0.079335	0.0942429	0.693251
	RPL13	6137	ribosomal protein L13	6362.12	0.0467557	0.0613221	0.0969242	0.694147
	ZMIZ2	83637	zinc finger MIZ-type containing 2	410.214	0.0451964	0.0756637	0.0967602	0.694147
	CTSB	1508	cathepsin B	2892.19	0.0450108	0.0763747	0.0969987	0.694147
	TRBC1	28639	T cell receptor beta constant 1	782.197	0.0442251	0.0803251	0.0967677	0.694147
	PPM1F	9647	protein phosphatase, Mg2+/Mn2+ dependent 1F	94.4711	0.0402471	0.092851	0.0968784	0.694147
	ZNF587	84914	zinc finger protein 587	291.444	0.0399181	0.0940854	0.0964646	0.694147
	NECAP2	55707	NECAP endocytosis associated 2	82.8466	0.0397822	0.0940724	0.096979	0.694147
	CDCA7L	55536	cell division cycle associated 7 like	120.603	0.0380355	0.0991141	0.0970762	0.694147
	SLC2A3	6515	solute carrier family 2 member 3	221.072	0.0368231	0.104033	0.0961522	0.694147
	ZBTB16	7704	zinc finger and BTB domain containing 16	45.6536	0.0359032	0.107291	0.0965032	0.694147
	CREB3L2	64764	cAMP responsive element binding protein 3 like 2	44.1863	0.0330797	0.12248	0.0964659	0.694147
	H4C15			81.3614	0.0318882	0.131014	0.0963082	0.694147
	CRYM-AS1	400508	CRYM antisense RNA 1	7.79677	0.0288793	0.147618	0.0969335	0.694147
	ADM	133	adrenomedullin	14.9819	-0.0288482	0.148817	0.0959587	0.694147
	TWSG1	57045	twisted gastrulation BMP signaling modulator 1	8.27426	-0.0290425	0.148234	0.0957952	0.694147
	RWDD4	201965	RWD domain containing 4	18.7897	-0.0307856	0.138406	0.0963651	0.694147
	CNIH2	254263	cornichon family AMPA receptor auxiliary protein 2	6.68054	-0.0316735	0.131405	0.096984	0.694147
	CFAP251			26.4634	-0.0340475	0.116095	0.0967422	0.694147
	DDIAS	220042	DNA damage induced apoptosis suppressor	45.7281	-0.0349101	0.111988	0.0963619	0.694147
	LARGE2	120071	LARGE xylosyl- and glucuronyltransferase 2	24.9686	-0.0367552	0.103526	0.0969458	0.694147
	HDAC9	9734	histone deacetylase 9	63.6438	-0.0380349	0.099595	0.0965051	0.694147
	CLEC18A	348174	C-type lectin domain family 18 member A	38.4157	-0.0382567	0.098785	0.0966462	0.694147
	GALK1	2584	galactokinase 1	192.413	-0.0420091	0.0877294	0.0970305	0.694147
	CTBS	1486	chitobiase	590.716	-0.0450633	0.0768525	0.0963896	0.694147
	DDRGK1	65992	DDRGK domain containing 1	168.99	-0.0451125	0.0757029	0.0970921	0.694147
	UBL3	5412	ubiquitin like 3	336.449	-0.0453585	0.075001	0.0965587	0.694147
	WTAP	9589	WT1 associated protein	677.955	-0.0466953	0.0634173	0.0965516	0.694147
	GOLPH3	64083	golgi phosphoprotein 3	410.715	-0.0467386	0.0627618	0.0965589	0.694147
	SEM1	7979	SEM1 26S proteasome complex subunit	49.2398	0.0393543	0.0951238	0.0971822	0.694161
	DAPP1	27071	dual adaptor of phosphotyrosine and 3-phosphoinositides 1	693.403	-0.0411455	0.0900891	0.0972093	0.694161
	PIM3	415116	Pim-3 proto-oncogene, serine/threonine kinase	909.479	-0.0424401	0.0862437	0.0972467	0.694161
	ESYT1	23344	extended synaptotagmin 1	766.349	0.0429363	0.0845098	0.0974076	0.694908
	CXorf38	159013	chromosome X open reading frame 38	38.804	0.034989	0.110304	0.0974532	0.694908
	KLRC3	3823	killer cell lectin like receptor C3	8.19308	0.029955	0.141619	0.0975642	0.695151
	PLEKHO2	80301	pleckstrin homology domain containing O2	2211.48	-0.0446149	0.0776519	0.0976156	0.695151
	UBR2	23304	ubiquitin protein ligase E3 component n-recognin 2	1177.16	-0.0468219	0.0567185	0.0976401	0.695151
	GATA1	2623	GATA binding protein 1	247.057	0.0397706	0.0935622	0.0976941	0.695172
	TWNK	56652	twinkle mtDNA helicase	40.5779	0.0382798	0.0977408	0.0978423	0.695501
	FAM20C	56975	FAM20C golgi associated secretory pathway kinase	55.8855	-0.038394	0.0974215	0.0978132	0.695501
	IL18RAP	8807	interleukin 18 receptor accessory protein	806.531	-0.0370248	0.101641	0.0979723	0.696063
	RGPD6	729540	RANBP2 like and GRIP domain containing 6	105.051	0.0370772	0.101234	0.0982336	0.697193
	MASTL	84930	microtubule associated serine/threonine kinase like	31.7241	0.032459	0.123954	0.0981857	0.697193
	HCST	10870	hematopoietic cell signal transducer	365.379	0.0463767	0.0616605	0.0987722	0.698932
	PRKCQ	5588	protein kinase C theta	156.417	0.0438211	0.0799811	0.0987708	0.698932
	SELENOF	9403	selenoprotein F	92.7185	0.0342711	0.112252	0.0987861	0.698932
	KCTD1	284252	potassium channel tetramerization domain containing 1	17.4088	-0.0326289	0.122012	0.0987049	0.698932
	GPER1	2852	G protein-coupled estrogen receptor 1	15.1639	-0.0333802	0.117445	0.0985867	0.698932
	SLC25A46	91137	solute carrier family 25 member 46	180.519	-0.0426174	0.0845451	0.0986162	0.698932
	NNT	23530	nicotinamide nucleotide transhydrogenase	242.465	0.0432709	0.0819737	0.0989474	0.699121
	DTNBP1	84062	dystrobrevin binding protein 1	139.251	-0.0408062	0.0897943	0.0988735	0.699121
	VPS8	23355	VPS8 subunit of CORVET complex	649.837	-0.0432442	0.0820552	0.0989665	0.699121
	AP003071.5			10.9977	0.0320873	0.125106	0.0990769	0.699538
	CYP4F29P	54055	cytochrome P450 family 4 subfamily F member 29, pseudogene	15.8453	0.0311992	0.131189	0.0991671	0.699755
	SF3B1	23451	splicing factor 3b subunit 1	1176.93	-0.0462175	0.0627503	0.0992101	0.699755
	AC093323.1			78.7438	0.0397669	0.0923995	0.0992718	0.699828
	WRAP53	55135	WD repeat containing antisense to TP53	57.0705	0.0402185	0.0910125	0.0994528	0.700427
	ZDHHC14	79683	zinc finger DHHC-type containing 14	12.5376	0.0316281	0.127707	0.0994595	0.700427
	WWC3	55841	WWC family member 3	764.492	-0.0463992	0.0587656	0.099512	0.700435
	CETN3	1070	centrin 3	10.2697	-0.0315234	0.12819	0.0996187	0.700463
	SLC25A28	81894	solute carrier family 25 member 28	203.124	-0.0423095	0.0847549	0.0995816	0.700463
	PDPK2P	653650	3-phosphoinositide dependent protein kinase 2, pseudogene	9.26875	0.0314914	0.128284	0.0997017	0.700686
	GLUD1	2746	glutamate dehydrogenase 1	562.851	-0.0464451	0.051751	0.100133	0.703356
	ARHGAP15	55843	Rho GTPase activating protein 15	35.5673	0.0360171	0.103224	0.10019	0.703392
	CCR3	1232	C-C motif chemokine receptor 3	250.434	0.0372714	0.098783	0.100415	0.704608
	FAM98B	283742	family with sequence similarity 98 member B	104.692	0.0410021	0.0879528	0.100601	0.704982
	SHKBP1	92799	SH3KBP1 binding protein 1	617.327	-0.0409525	0.0880799	0.100623	0.704982
	B4GALT5	9334	beta-1,4-galactosyltransferase 5	1234.79	-0.0427957	0.0822214	0.100621	0.704982
	H1-2			195.5	0.0386358	0.094473	0.100762	0.705475
	AIF1L	83543	allograft inflammatory factor 1 like	25.8519	-0.0287018	0.143979	0.100797	0.705475
	RPL27A	6157	ribosomal protein L27a	1919.61	0.0463168	0.0527912	0.100909	0.705551
	FAM111B	374393	family with sequence similarity 111 member B	15.1114	0.0316781	0.125091	0.100911	0.705551
	SETX	23064	senataxin	1250.83	0.046125	0.0588077	0.100996	0.705729
	DMAC2	55101	distal membrane arm assembly complex 2	58.8149	-0.0374203	0.0977879	0.101092	0.705729
	CYTH1	9267	cytohesin 1	2302.71	-0.0462656	0.0548582	0.10104	0.705729
	FAN1	22909	FANCD2 and FANCI associated nuclease 1	126.415	0.0429657	0.0810186	0.101265	0.706499
	ICA1	3382	islet cell autoantigen 1	20.9217	0.0301778	0.13486	0.101306	0.706499
	SLC25A39	51629	solute carrier family 25 member 39	1056.36	0.0383373	0.0947687	0.101517	0.706532
	NRXN2	9379	neurexin 2	7.58296	-0.0273474	0.148673	0.101466	0.706532
	IRAK3	11213	interleukin 1 receptor associated kinase 3	1006.28	-0.0417109	0.0851896	0.101435	0.706532
	RAB14	51552	RAB14, member RAS oncogene family	652.636	-0.0455325	0.0655285	0.101518	0.706532
	NFATC2IP	84901	nuclear factor of activated T cells 2 interacting protein	463.795	0.0441552	0.0752126	0.101734	0.707402
	CD200	4345	CD200 molecule	22.9041	0.0332798	0.113874	0.101746	0.707402
	IFI16	3428	interferon gamma inducible protein 16	1917.56	-0.0431391	0.0797121	0.101941	0.708396
	CBWD5	220869	COBW domain containing 5	161.715	-0.042929	0.0803641	0.102142	0.709431
	NBPF1	55672	NBPF member 1	63.5586	-0.038189	0.0945952	0.102339	0.710071
	ANKHD1	54882	ankyrin repeat and KH domain containing 1	776.422	-0.0451488	0.0676923	0.102304	0.710071
	TAOK3	51347	TAO kinase 3	757.35	0.045601	0.0618278	0.102809	0.710308
	COX5B	1329	cytochrome c oxidase subunit 5B	397.537	0.0445126	0.0717158	0.102815	0.710308
	ACSS2	55902	acyl-CoA synthetase short chain family member 2	291.893	0.0444427	0.0722848	0.102731	0.710308
	SHPRH	257218	SNF2 histone linker PHD RING helicase	71.4932	0.038526	0.0934308	0.102637	0.710308
	STARD8	9754	StAR related lipid transfer domain containing 8	59.4183	0.03792	0.095174	0.102603	0.710308
	DGKG	1608	diacylglycerol kinase gamma	63.0205	0.0361124	0.100568	0.102873	0.710308
	MMAA	166785	metabolism of cobalamin associated A	36.3638	0.0350825	0.10437	0.102808	0.710308
	SRPK1	6732	SRSF protein kinase 1	883.251	-0.0395957	0.0905926	0.10245	0.710308
	NSMAF	8439	neutral sphingomyelinase activation associated factor	329.747	-0.0435363	0.077032	0.102893	0.710308
	GOLGA7	51125	golgin A7	465.429	-0.045177	0.0665829	0.102781	0.710308
	KCNAB2	8514	potassium voltage-gated channel subfamily A regulatory beta subunit 2	1566.44	0.0457937	0.0551531	0.103746	0.710684
	PCSK7	9159	proprotein convertase subtilisin/kexin type 7	1139.31	0.0454605	0.062224	0.103402	0.710684
	PHKG2	5261	phosphorylase kinase catalytic subunit gamma 2	175.076	0.0447722	0.0685843	0.103654	0.710684
	MT-CO1			29100.4	0.0446437	0.0702569	0.103203	0.710684
	AKAP9	10142	A-kinase anchoring protein 9	484.542	0.041111	0.0852751	0.103774	0.710684
	RFNG	5986	RFNG O-fucosylpeptide 3-beta-N-acetylglucosaminyltransferase	228.676	0.0408475	0.0864464	0.103266	0.710684
	KLHL24	54800	kelch like family member 24	71	0.0386761	0.092274	0.10369	0.710684
	GPR157	80045	G protein-coupled receptor 157	72.6966	0.0381852	0.0934875	0.103914	0.710684
	DNM1	1759	dynamin 1	39.3071	0.0366087	0.0981539	0.103881	0.710684
	ZNF420	147923	zinc finger protein 420	25.0726	0.0328441	0.113745	0.103812	0.710684
	EPS8	2059	epidermal growth factor receptor pathway substrate 8	17.675	-0.028727	0.140354	0.103702	0.710684
	RNA5-8SP6	100873336	RNA, 5.8S ribosomal pseudogene 6	2869.15	-0.0295878	0.135803	0.103303	0.710684
	CD59	966	CD59 molecule (CD59 blood group)	846.993	-0.0359709	0.100219	0.103888	0.710684
	SMG1P5	595101	SMG1 pseudogene 5	73.2659	-0.0394732	0.0902809	0.103382	0.710684
	HSPH1	10808	heat shock protein family H (Hsp110) member 1	249.011	-0.0418896	0.0828148	0.103704	0.710684
	KRT23	25984	keratin 23	734.126	-0.0436624	0.0760958	0.103199	0.710684
	DHX38	9785	DEAH-box helicase 38	429.409	-0.044337	0.0718686	0.103546	0.710684
	NUDCD3	23386	NudC domain containing 3	281.414	-0.0444402	0.0706355	0.103938	0.710684
	NAAA	27163	N-acylethanolamine acid amidase	402.335	-0.0448318	0.0681185	0.103642	0.710684
	C1orf50	79078	chromosome 1 open reading frame 50	52.2057	0.037306	0.0958214	0.104176	0.711601
	TOLLIP	54472	toll interacting protein	41.2581	0.0336536	0.109229	0.104126	0.711601
	COMMD1	150684	copper metabolism domain containing 1	47.733	0.037807	0.0942698	0.104322	0.71169
[truncated: 14,529 more rows]
